# Supplementary material for: Synthesis of fused-pyran derivatives via a base-mediated annulation of bis-allenoates followed by auto-oxidation in air
Source: Royal Society of Chemistry journal article supplement (doi:10.1039/d4ob00835a), 2024-01-01
Supplement: d4ob00835a1.pdf [file d4ob00835a1.pdf]

Synthesis of fused-pyran derivatives via a base-mediated annulation of bis-allenoates  
followed by auto-oxidation in air

Jun-Bo Zhao,<sup>a</sup> Jing-Kui Yang<sup>a\*</sup>

<sup>a</sup>School of Chemical Sciences, University of Chinese Academy of Sciences, Beijing, 100040, PRC.

\*Email: [jkyang@ucas.edu.cn](mailto:jkyang@ucas.edu.cn).

**Table of contents:**

|                                                            |     |
|------------------------------------------------------------|-----|
| 1. General Information.....                                | 2   |
| 2. Experimental Procedures .....                           | 2   |
| 2.1 Preparation and Characterization of Substrates 3 ..... | 2   |
| 2.2 Optimization of the reaction conditions.....           | 24  |
| 2.3 Synthesis and characterization of product 4 .....      | 26  |
| 2.4 Synthesis and characterization of product 6 .....      | 42  |
| 3. Mechanistic Studies .....                               | 60  |
| 3.1 Control experiments .....                              | 60  |
| 3.2 Deuterium labelling experiments .....                  | 61  |
| 3.3 Oxygen-18 labelling experiments .....                  | 62  |
| 3.4 NMR monitoring experiments.....                        | 63  |
| 3.5 Mass spectra of T1 and T2 .....                        | 65  |
| 4. Single Crystal X-Ray Crystallography .....              | 66  |
| 5. NMR Spectra .....                                       | 77  |
| 6. References.....                                         | 237 |

## 1. General Information

All solvents and reagents were obtained from commercial sources and used without further purification. All reactions were monitored by TLC or NMR analysis. Thin layer chromatography (TLC) was performed on glass plates coated with 0.25 mm silica gel. Purification of reaction products was achieved using flash chromatography on silica gel (300–400 mesh). NMR spectra were recorded using JNM-ECZ600R/S1 or JEOL ECZ400S spectrometers (<sup>1</sup>H NMR at 600/400 MHz, <sup>13</sup>C NMR at 151/101 MHz). Chemical shifts are reported in ppm. The <sup>1</sup>H NMR spectra were referenced to CDCl<sub>3</sub> (δ = 7.26, containing 0.03% TMS), or CD<sub>2</sub>Cl<sub>2</sub> (δ = 5.32, containing 0.05% TMS) as the internal standard. The <sup>13</sup>C NMR spectra were referenced to CDCl<sub>3</sub> (δ = 77.16) or CD<sub>2</sub>Cl<sub>2</sub> (δ = 53.84). NMR data are reported as follows: chemical shift, multiplicity (s = singlet, d = doublet, t = triplet, q = quartet, m = multiplet, br = broad). High-resolution mass spectra were acquired under electron spray ionization (ESI) conditions using a ThermoFisher mass spectrometer (Q Exactive Focus) interfaced with an ultra-performance liquid chromatography system (Vanquish Flex). IR spectra were measured with a Bruker VERTEX 70 spectrometer. Single-crystal X-ray diffraction data were collected on a Bruker D8 VENTURE diffractometer equipped with a molybdenum microfocus source. Melting points were determined using an X-4A microscopic melting point apparatus; the reported temperatures are uncorrected.

## 2. Experimental Procedures

### 2.1 Preparation and Characterization of Substrates 3

**General Procedures:** Substrates **3** were synthesized following a modified experimental procedure described in the literature.<sup>1,2</sup>

A 25 mL round-bottomed flask was charged with a solution of the phosphoranylid **1** (760 mg, 2.0 mmol) in dichloromethane (DCM, 10 mL). To this solution, triethylamine (TEA, 253 mg, 2.5 mmol) was added, and the resulting mixture was stirred at 40 °C in an oil bath for 10 minutes. Subsequently, pimeloyl chloride **2** (197-236 mg, 1.0-1.2 mmol) was introduced dropwise to the reaction mixture over a period of 5 minutes. The progress of the reaction was monitored by thin-layer chromatography (TLC). Upon completion, the reaction mixture was concentrated under reduced pressure to remove the solvent. The residue was then isolated via flash column chromatography on silica gel, employing a mixture of ethyl acetate and n-hexane as the eluent. The evaporation of the solvent under reduced pressure yielded a mixture of compounds **3**, **3'**, and **3''** as a gummy liquid. This product mixture was found to be unstable and was therefore directly transferred to the subsequent reaction without delay.

Table S1 Synthesis of the Substrates 3

| R                                                    | Compound           | Yield <sup>a</sup><br>(%) | [M + Na] <sup>+</sup><br>Calcd for | found    |
|------------------------------------------------------|--------------------|---------------------------|------------------------------------|----------|
| C <sub>6</sub> H <sub>5</sub>                        | <b>3a/3a'/3a''</b> | 95                        | 351.1355                           | 351.1355 |
| 2-OMeC <sub>6</sub> H <sub>4</sub>                   | <b>3b/3b'/3b''</b> | 72 <sup>b</sup>           | 411.1567                           | 411.1559 |
| 3-OMeC <sub>6</sub> H <sub>4</sub>                   | <b>3c/3c'/3c''</b> | 96                        | 411.1567                           | 411.1561 |
| 4-OMe C <sub>6</sub> H <sub>4</sub>                  | <b>3d/3d'/3d''</b> | 93                        | 411.1567                           | 411.1563 |
| 3,4-(OMe) <sub>2</sub> C <sub>6</sub> H <sub>3</sub> | <b>3e/3e'/3e''</b> | 94 <sup>b</sup>           | 471.1778                           | 471.1776 |
| 5-F-2-OMeC <sub>6</sub> H <sub>3</sub>               | <b>3f/3f'/3f''</b> | 87                        | 447.1378                           | 447.1375 |
| 4-PhC <sub>6</sub> H <sub>4</sub>                    | <b>3g/3g'/3g''</b> | 85                        | 503.1982                           | 503.1980 |
| 2-MeC <sub>6</sub> H <sub>4</sub>                    | <b>3h/3h'/3h''</b> | 79                        | 379.1669                           | 379.1666 |
| 4-MeC <sub>6</sub> H <sub>4</sub>                    | <b>3i/3i'/3i''</b> | 83                        | 379.1669                           | 379.1666 |
| 4-OCF <sub>3</sub> C <sub>6</sub> H <sub>4</sub>     | <b>3j/3j'/3j''</b> | 86                        | 519.1001                           | 519.1001 |
| 3-FC <sub>6</sub> H <sub>4</sub>                     | <b>3k/3k'/3k''</b> | 92                        | 387.1167                           | 387.1167 |
| 4-FC <sub>6</sub> H <sub>4</sub>                     | <b>3l/3l'/3l''</b> | 91                        | 387.1167                           | 387.1166 |
| 2-ClC <sub>6</sub> H <sub>4</sub>                    | <b>3m/3m'/3m''</b> | 78 <sup>b</sup>           | 419.0576                           | 419.0576 |
| 3-ClC <sub>6</sub> H <sub>4</sub>                    | <b>3n/3n'/3n''</b> | 94                        | 419.0576                           | 419.0575 |
| 4-ClC <sub>6</sub> H <sub>4</sub>                    | <b>3o/3o'/3o''</b> | 95                        | 419.0576                           | 419.0577 |
| 2,4- Cl <sub>2</sub> C <sub>6</sub> H <sub>3</sub>   | <b>3p/3p'/3p''</b> | 73 <sup>b</sup>           | 486.9797                           | 486.9789 |
| 3-BrC <sub>6</sub> H <sub>4</sub>                    | <b>3q/3q'/3q''</b> | 93                        | 506.9566                           | 506.9564 |
| 4-BrC <sub>6</sub> H <sub>4</sub>                    | <b>3r/3r'/3r''</b> | 95                        | 506.9566                           | 506.9565 |
| 4-IC <sub>6</sub> H <sub>4</sub>                     | <b>3s/3s'/3s''</b> | 69 <sup>b</sup>           | 602.9288                           | 602.9286 |
| 4-COOMeC <sub>6</sub> H <sub>4</sub>                 | <b>3t/3t'/3t''</b> | 72 <sup>b</sup>           | 467.1465                           | 467.1456 |
| 4-CF <sub>3</sub> C <sub>6</sub> H <sub>4</sub>      | <b>3u/3u'/3u''</b> | 88                        | 487.1103                           | 487.1099 |
| 2-naphthyl                                           | <b>3v/3v'/3v''</b> | 91                        | 451.1669                           | 451.1664 |
| 2-thienyl                                            | <b>3w/3w'/3w''</b> | 96                        | 363.0484                           | 363.0480 |
| cyclopropyl                                          | <b>3x/3x'/3x''</b> | 82 <sup>c</sup>           | 279.1356                           | 279.1353 |

<sup>a</sup> Isolated yields. <sup>b</sup> PhMe, 80 °C. <sup>c</sup> CHCl<sub>3</sub>, 60 °C.

**1,11-diphenylundeca-2,3,8,9-tetraene-1,11-dione / 1,11-diphenylundeca-2,3-dien-8-yne-1,11-dione / 1,11-diphenylundeca-3,8-diyne-1,11-dione (3a/3a'/3a'')**

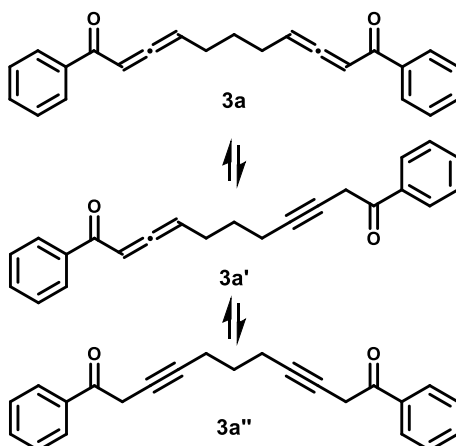

312 mg (95% yield) yellowish gummy liquid, isolated by flash column chromatography (SiO<sub>2</sub>, ethyl acetate: n-hexane, 1:5). R<sub>f</sub> = 0.3.

**<sup>1</sup>H NMR** (CDCl<sub>3</sub>, 600 MHz): δ 7.98 (m, 2H), 7.92 – 7.68 (m, 4H), 7.65 – 7.27 (m, 11H), 6.40 – 6.31 (m, 2H), 5.57 (m, 2H), 3.81 (t, *J* = 2.4 Hz, 2H), 2.37 – 2.01 (m, 7H), 1.75 – 1.43 (m, 4H).

**<sup>13</sup>C NMR** (CDCl<sub>3</sub>, 151 MHz): δ 214.03, 214.01, 194.02, 193.96, 191.99, 191.78, 191.75, 137.82, 137.80, 135.64, 133.61, 133.59, 132.76, 132.72, 128.76, 128.73, 128.71, 128.59, 128.44, 128.42, 94.52, 94.51, 94.38, 94.28, 94.18, 94.17, 84.92, 73.24, 31.05, 31.01, 27.88, 27.86, 27.79, 26.95, 26.80, 18.30, 18.11.

**HRMS** (ESI) *m/z*: [M + Na]<sup>+</sup> calcd for C<sub>23</sub>H<sub>20</sub>O<sub>2</sub>Na<sup>+</sup>, 351.1355; found 351.1355.

**1,11-bis(2-methoxyphenyl)undeca-2,3,8,9-tetraene-1,11-dione / 1,11-bis(2-methoxyphenyl)undeca-2,3-dien-8-yne-1,11-dione / 1,11-bis(2-methoxyphenyl)undeca-3,8-diyne-1,11-dione (3b/3b'/3b'')**

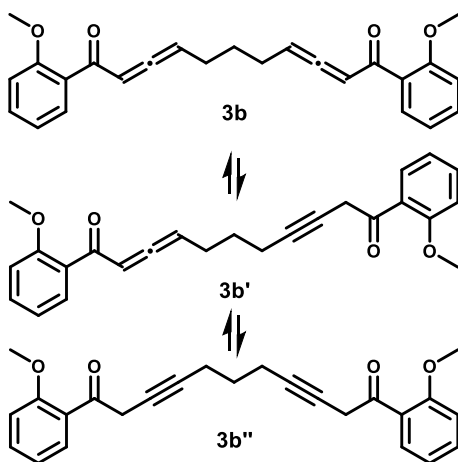

279 mg (72% yield) yellowish gummy liquid, isolated by flash column chromatography (SiO<sub>2</sub>, ethyl acetate: n-hexane, 1:3). R<sub>f</sub> = 0.2.

<sup>1</sup>H NMR (CDCl<sub>3</sub>, 600 MHz): δ 7.74 (dt, *J* = 7.7, 1.9 Hz, 1H), 7.48 – 7.36 (m, 3H), 7.02 – 6.89 (m, 4H), 6.35 – 6.28 (m, 1H), 5.49 – 5.40 (m, 1H), 3.91 – 3.79 (m, 7H), 2.13 (m, 2H), 1.99 (m, 3H), 1.53 (m, 1H), 1.46 – 1.38 (m, 1H).

<sup>13</sup>C NMR (CDCl<sub>3</sub>, 151 MHz): δ 214.14, 213.97, 196.18, 196.08, 194.14, 193.86, 193.81, 158.79, 157.59, 157.57, 157.51, 134.09, 134.06, 132.49, 132.40, 132.37, 132.32, 130.92, 129.80, 129.78, 129.71, 129.05, 128.66, 126.87, 120.86, 120.84, 120.37, 120.33, 111.64, 111.48, 111.44, 97.80, 97.70, 97.68, 94.45, 94.42, 83.65, 73.90, 73.81, 55.74, 55.70, 35.53, 35.49, 29.79, 28.19, 27.95, 27.92, 27.89, 26.76, 26.74, 26.61, 18.23, 18.06.

HRMS (ESI) *m/z*: [M+Na]<sup>+</sup> calcd for C<sub>25</sub>H<sub>24</sub>O<sub>4</sub>Na<sup>+</sup>, 411.1567; found 411.1559.

**1,11-bis(3-methoxyphenyl)undeca-2,3,8,9-tetraene-1,11-dione / 1,11-bis(3-methoxyphenyl)undeca-2,3-dien-8-yne-1,11-dione / 1,11-bis(3-methoxyphenyl)undeca-3,8-diyne-1,11-dione (3c/3c'/3c'')**

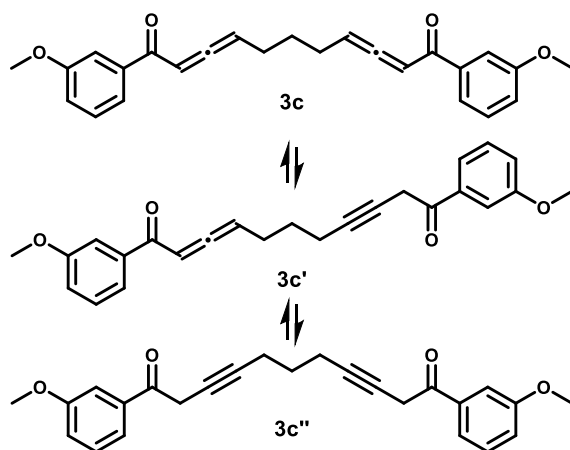

373 mg (96% yield) yellowish gummy liquid, isolated by flash column chromatography (SiO<sub>2</sub>, ethyl acetate: n-hexane, 1:3). R<sub>f</sub> = 0.2.

<sup>1</sup>H NMR (CDCl<sub>3</sub>, 600 MHz): δ 7.55 (m, 1H), 7.50 (m, 1H), 7.44 (m, 2H), 7.40 – 7.29 (m, 4H), 7.13 – 7.04 (m, 2H), 6.45 – 6.26 (m, 1H), 5.69 – 5.47 (m, 1H), 3.86 – 3.81 (m, 7H), 3.80 (m, 2H), 2.37 – 2.13 (m, 5H), 1.74 – 1.55 (m, 3H).

<sup>13</sup>C NMR (CDCl<sub>3</sub>, 151 MHz): δ 213.93, 193.78, 191.58, 191.40, 191.36, 159.95, 159.73, 139.12, 139.10, 136.98, 129.73, 129.39, 129.37, 121.37, 121.35, 121.31, 120.11, 120.07, 119.19, 119.17, 113.19, 113.17, 112.91, 112.87, 94.53, 94.50, 94.39, 94.24, 94.13, 94.11, 84.88, 73.21, 55.57, 55.53, 31.13, 31.10, 27.90, 27.79, 26.96, 26.81, 18.31, 18.12.

HRMS (ESI) m/z: [M+Na]<sup>+</sup> calcd for C<sub>25</sub>H<sub>24</sub>O<sub>4</sub>Na<sup>+</sup>, 411.1567; found 411.1561.

**1,11-bis(4-methoxyphenyl)undeca-2,3,8,9-tetraene-1,11-dione / 1,11-bis(4-methoxyphenyl)undeca-2,3-dien-8-yne-1,11-dione / 1,11-bis(4-methoxyphenyl)undeca-3,8-diyne-1,11-dione (3d/3d'/3d'')**

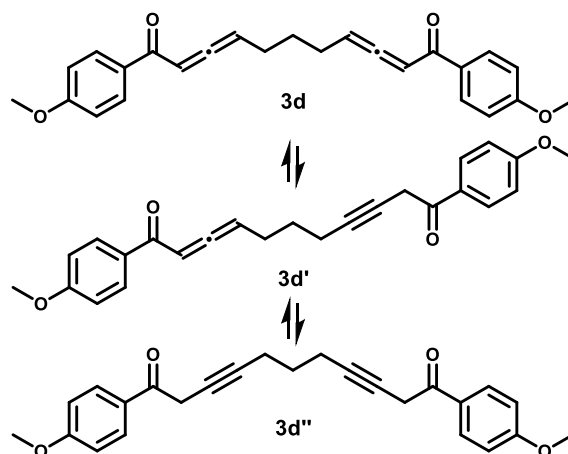

361 mg (93% yield) yellowish gummy liquid, isolated by flash column chromatography (SiO<sub>2</sub>, ethyl acetate: n-hexane, 1:5). R<sub>f</sub> = 0.3.

<sup>1</sup>H NMR (CDCl<sub>3</sub>, 600 MHz): δ 7.95 (m, 2H), 7.90 – 7.85 (m, 4H), 6.90 (m, 6H), 6.39 – 6.33 (m, 2H), 5.57 (m, 2H), 3.85 (m, 10H), 3.74 (t, *J* = 2.5 Hz, 2H), 2.30 – 2.16 (m, 6H), 1.64 (m, 4H).

<sup>13</sup>C NMR (CDCl<sub>3</sub>, 151 MHz): δ 213.31, 213.27, 192.51, 189.95, 189.75, 189.69, 163.86, 163.40, 163.39, 131.05, 131.02, 131.01, 130.62, 128.66, 128.63, 113.88, 113.72, 113.65, 113.64, 94.34, 94.32, 94.16, 93.81, 93.69, 93.65, 84.62, 84.58, 73.58, 55.58, 55.54, 30.75, 30.72, 27.93, 27.91, 27.83, 27.00, 26.98, 26.83, 18.33, 18.11.

HRMS (ESI) m/z: [M+Na]<sup>+</sup> calcd for C<sub>25</sub>H<sub>24</sub>O<sub>4</sub>Na<sup>+</sup>, 411.1567; found 411.1563.

**1,11-bis(3,4-dimethoxyphenyl)undeca-2,3,8,9-tetraene-1,11-dione / 1,11-bis(3,4-dimethoxyphenyl)undeca-2,3-dien-8-yne-1,11-dione / 1,11-bis(3,4-dimethoxyphenyl)undeca-3,8-diyne-1,11-dione (3e/3e'/3e'')**

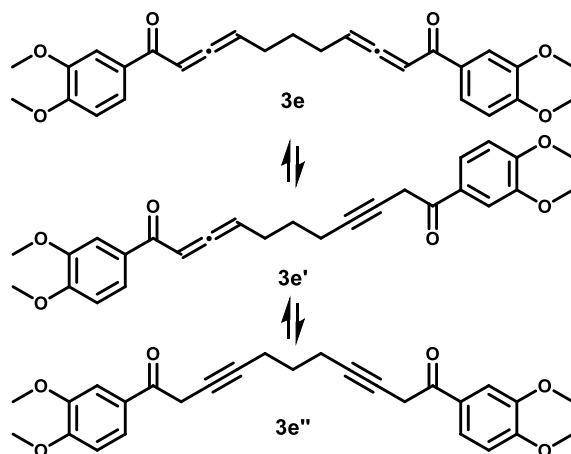

421 mg (94% yield) yellow gummy liquid, isolated by flash column chromatography (SiO<sub>2</sub>, ethyl acetate: n-hexane, 1:5). R<sub>f</sub> = 0.3.

<sup>1</sup>H NMR (CDCl<sub>3</sub>, 600 MHz): δ 7.65 (m, 6H), 7.53 (m, 5H), 7.48 – 7.42 (m, 7H), 6.89 – 6.81 (m, 2H), 6.40 (m, 1H), 5.59 (m, 1H), 3.94 – 3.88 (m, 10H), 3.75 (t, *J* = 2.1 Hz, 1H), 2.24 (m, 3H), 1.65 (m, 2H).

<sup>13</sup>C NMR (CDCl<sub>3</sub>, 151 MHz): δ 213.24, 213.20, 213.16, 192.56, 189.63, 189.43, 189.36, 153.66, 153.21, 149.11, 149.02, 132.94, 132.25, 132.20, 132.13, 132.04, 132.02, 130.71, 128.75, 128.63, 128.55, 123.59, 123.56, 123.38, 123.31, 110.98, 110.95, 110.92, 110.62, 110.09, 109.89, 84.57, 73.58, 56.17, 56.13, 56.06, 56.03, 30.61, 30.57, 27.90, 27.80, 26.93, 26.80, 18.30, 18.10.

HRMS (ESI) *m/z*: [M+Na]<sup>+</sup> calcd for C<sub>27</sub>H<sub>28</sub>O<sub>6</sub>Na<sup>+</sup>, 471.1778; found 471.1776.

**1,11-bis(5-fluoro-2-methoxyphenyl)undeca-2,3,8,9-tetraene-1,11-dione / 1,11-bis(5-fluoro-2-methoxyphenyl)undeca-2,3-dien-8-yne-1,11-dione / 1,11-bis(5-fluoro-2-methoxyphenyl)undeca-3,8-diyne-1,11-dione (3f/3f'/3f'')**

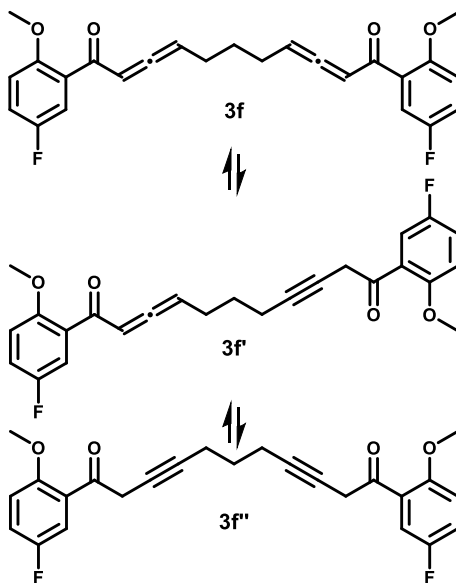

369 mg (87% yield) yellowish gummy liquid, isolated by flash column chromatography (SiO<sub>2</sub>, ethyl acetate: n-hexane, 1:3). R<sub>f</sub> = 0.2.

<sup>1</sup>H NMR (CDCl<sub>3</sub>, 600 MHz): δ 7.47 (m, 2H), 7.19 – 7.05 (m, 6H), 6.94 – 6.84 (m, 4H), 6.33 (m, 2H), 5.56 – 5.45 (m, 2H), 3.92 – 3.78 (m, 16H), 2.70 – 2.45 (m, 2H), 2.31 – 1.97 (m, 8H), 1.69 – 1.37 (m, 6H).

<sup>13</sup>C NMR (CDCl<sub>3</sub>, 151 MHz): δ 214.46, 214.31, 195.15, 191.39, 156.90 (d, J<sub>FC</sub> = 240.1 Hz), 156.54 (d, J<sub>FC</sub> = 240.1 Hz), 155.10, 153.80, 127.40, 120.62, 120.47, 118.68, 118.56, 118.42, 117.20, 117.04, 116.41 (d, J<sub>FC</sub> = 9.7 Hz), 116.25 (d, J<sub>FC</sub> = 9.5 Hz), 113.03 (d, J<sub>FC</sub> = 7.4 Hz), 112.81 (d, J<sub>FC</sub> = 7.8 Hz), 97.55, 97.44, 97.41, 94.73, 83.88, 73.57, 56.42, 56.32, 35.50, 27.91, 26.78, 26.76, 26.59, 18.24, 18.06.

HRMS (ESI) m/z: [M + Na]<sup>+</sup> calcd for C<sub>25</sub>H<sub>22</sub>F<sub>2</sub>O<sub>4</sub>Na<sup>+</sup>, 447.1378; found 447.1375.

**1,11-di([1,1'-biphenyl]-4-yl)undeca-2,3,8,9-tetraene-1,11-dione / 1,11-di([1,1'-biphenyl]-4-yl)undeca-2,3-dien-8-yne-1,11-dione / 1,11-di([1,1'-biphenyl]-4-yl)undeca-3,8-diyne-1,11-dione (3g/3g'/3g'')**



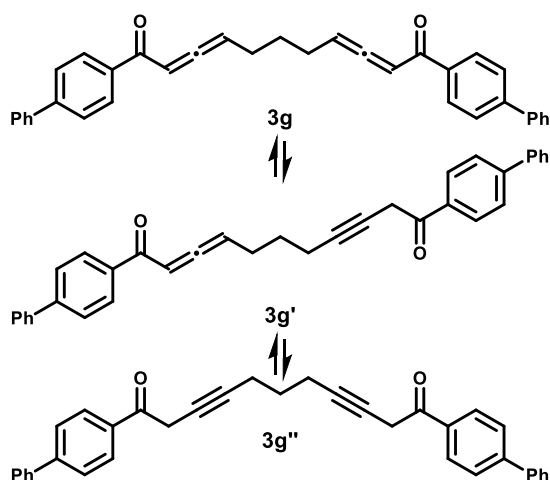

408 mg (85% yield) yellowish gummy liquid, isolated by flash column chromatography (SiO<sub>2</sub>, ethyl acetate: n-hexane, 1:5). R<sub>f</sub> = 0.3.

<sup>1</sup>H NMR (CDCl<sub>3</sub>, 600 MHz): δ 8.00 (dt, *J* = 61.9, 7.7 Hz, 3H), 7.64 (m, 9H), 7.49 – 7.34 (m, 7H), 6.43 (m, 1H), 5.62 (m, 1H), 3.84 (m, 1H), 2.74 – 2.51 (m, 1H), 2.39 – 2.11 (m, 4H), 1.78 – 1.57 (m, 3H).

<sup>13</sup>C NMR (CDCl<sub>3</sub>, 151 MHz): δ 213.88, 213.84, 193.58, 193.50, 191.30, 191.03, 190.93, 146.21, 145.45, 145.41, 140.04, 139.98, 139.80, 136.48, 136.45, 134.30, 129.38, 129.34, 129.32, 129.30, 129.24, 129.09, 129.05, 128.96, 128.44, 128.28, 128.25, 127.37, 127.35, 127.11, 127.07, 124.90, 94.58, 94.55, 94.41, 94.22, 94.07, 93.96, 84.93, 73.31, 31.08, 31.03, 27.86, 27.78, 26.95, 26.82, 18.32.

HRMS (ESI) *m/z*: [M + Na]<sup>+</sup> calcd for C<sub>35</sub>H<sub>28</sub>O<sub>2</sub>Na<sup>+</sup>, 503.1982; found 503.1980.

**1,11-di-*o*-tolylundeca-2,3,8,9-tetraene-1,11-dione / 1,11-di-*o*-tolylundeca-2,3-dien-8-yne-1,11-dione / 1,11-di-*o*-tolylundeca-3,8-diyne-1,11-dione (3h/3h'/3h'')**

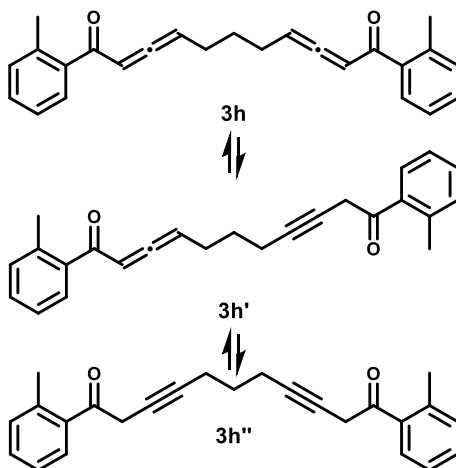

281 mg (79% yield) yellowish gummy liquid, isolated by flash column chromatography (SiO<sub>2</sub>, ethyl acetate: n-hexane, 1:5). R<sub>f</sub> = 0.3.

<sup>1</sup>H NMR (CDCl<sub>3</sub>, 600 MHz): δ 7.40 – 7.26 (m, 3H), 7.23 – 7.11 (m, 3H), 6.12 (ddt, *J* = 8.9, 6.0, 2.9 Hz, 1H), 5.38 – 5.31 (m, 1H), 2.38 (d, *J* = 6.3 Hz, 5H), 1.92 (m, 2H), 1.36 (t, *J* = 7.3 Hz, 1H).

<sup>13</sup>C NMR (CDCl<sub>3</sub>, 151 MHz): δ 214.94, 214.77, 214.74, 196.81, 196.72, 138.78, 138.75, 136.61, 136.55, 132.24, 131.96, 131.17, 131.15, 131.13, 130.43, 130.38, 129.19, 128.09, 128.07, 125.90, 125.76, 125.02, 97.71, 97.66, 94.41, 94.38, 94.30, 84.66, 73.40, 33.40, 29.82, 27.80, 27.78, 27.75, 26.70, 26.69, 26.65, 21.60, 20.05, 20.01, 18.11.

HRMS (ESI) *m/z*: [M + Na]<sup>+</sup> calcd for C<sub>25</sub>H<sub>24</sub>O<sub>2</sub>Na<sup>+</sup>, 379.1669; found 379.1666.

**1,11-di-p-tolylundeca-2,3,8,9-tetraene-1,11-dione / 1,11-di-p-tolylundeca-2,3-dien-8-yne-1,11-dione / 1,11-di-p-tolylundeca-3,8-diyne-1,11-dione (3i/3i'/3i'')**

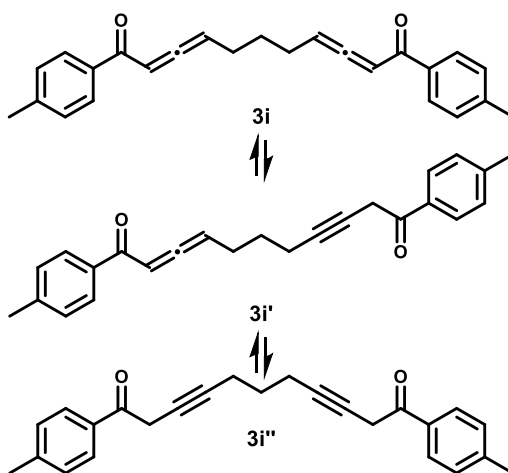

295 mg (83% yield) yellowish gummy liquid, isolated by flash column chromatography (SiO<sub>2</sub>, ethyl acetate: n-hexane, 1:5). R<sub>f</sub> = 0.3.

<sup>1</sup>H NMR (CDCl<sub>3</sub>, 600 MHz): δ 7.87 (m, 2H), 7.77 (dd, *J* = 8.3, 3.0 Hz, 4H), 7.26 – 7.17 (m, 6H), 6.41 – 6.32 (m, 2H), 5.57 (m, 2H), 3.77 (t, *J* = 2.4 Hz, 2H), 2.42 – 2.34 (m, 10H), 2.29 – 2.14 (m, 6H), 1.69 – 1.58 (m, 4H).

<sup>13</sup>C NMR (CDCl<sub>3</sub>, 151 MHz): δ 213.6, 213.5, 193.6, 193.5, 191.3, 191.1, 191.0, 144.4, 143.5, 135.2, 133.1, 129.4, 129.2, 129.1, 128.9, 128.8, 128.6, 124.4, 94.4, 94.3, 94.2, 94.0, 93.9, 84.7, 73.4, 30.9, 30.8, 27.9, 27.8, 26.9, 26.8, 21.7, 18.3, 18.1.

HRMS (ESI) *m/z*: [M + Na]<sup>+</sup> calcd for C<sub>25</sub>H<sub>24</sub>O<sub>2</sub>Na<sup>+</sup>, 379.1669; found 379.1666.

**1,11-bis(4-(trifluoromethoxy)phenyl)undeca-2,3,8,9-tetraene-1,11-dione / 1,11-bis(4-(trifluoromethoxy)phenyl)undeca-2,3-dien-8-yne-1,11-dione / 1,11-bis(4-(trifluoromethoxy)phenyl)undeca-3,8-diyne-1,11-dione (3j/3j'/3j'')**

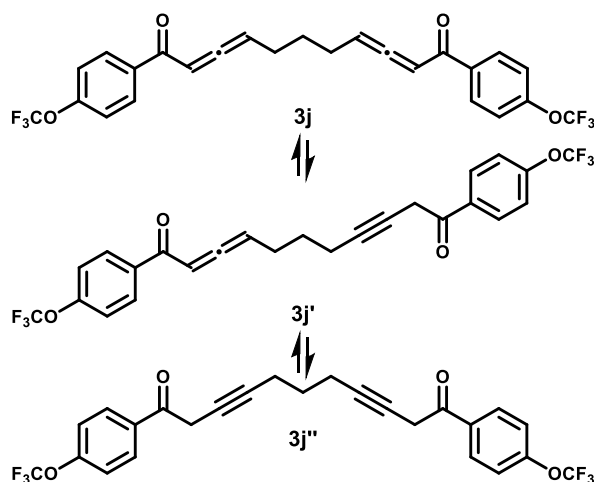

427 mg (86% yield) yellow gummy liquid, isolated by flash column chromatography (SiO<sub>2</sub>, ethyl acetate: n-hexane, 1:5). R<sub>f</sub> = 0.3.

**<sup>1</sup>H NMR** (CDCl<sub>3</sub>, 600 MHz): δ 8.06 – 7.99 (m, 1H), 7.94 – 7.87 (m, 2H), 7.46 – 7.38 (m, 1H), 7.30 – 7.09 (m, 5H), 6.35 (m, 1H), 5.68 – 5.55 (m, 1H), 3.83 – 3.74 (m, 1H), 2.68 – 2.15 (m, 6H), 1.89 – 1.53 (m, 4H).

**<sup>13</sup>C NMR** (CDCl<sub>3</sub>, 151 MHz): δ 214.12, 214.10, 214.04, 213.97, 192.44, 192.35, 190.30, 189.99, 189.94, 170.56, 170.31, 153.77, 152.97, 152.38, 149.92, 136.02, 135.97, 133.79, 132.53, 132.38 (d, *J*<sub>FC</sub> = 10.8 Hz), 130.82, 130.78, 130.71, 130.67, 130.43, 128.62 (d, *J*<sub>FC</sub> = 12.6 Hz), 128.49, 126.09 (d, *J*<sub>FC</sub> = 7.6 Hz), 122.99, 121.34, 121.28, 121.14, 120.53 (q, *J*<sub>FC</sub> = 256.70 Hz), 119.63, 117.85, 99.23, 99.18, 94.76, 94.62, 94.15, 93.98, 93.94, 85.15, 75.69, 72.90, 33.74, 31.09, 31.03, 27.79, 27.72, 27.68, 26.86, 26.75, 24.57, 19.59, 18.21.

**HRMS** (ESI) *m/z*: [M + Na]<sup>+</sup> calcd for C<sub>25</sub>H<sub>18</sub>F<sub>6</sub>O<sub>4</sub>Na<sup>+</sup>, 519.1001; found 519.1001.

**1,11-bis(3-fluorophenyl)undeca-2,3,8,9-tetraene-1,11-dione / 1,11-bis(3-fluorophenyl)undeca-2,3-dien-8-yne-1,11-dione / 1,11-bis(3-fluorophenyl)undeca-3,8-diyne-1,11-dione (3k/3k'/3k'')**

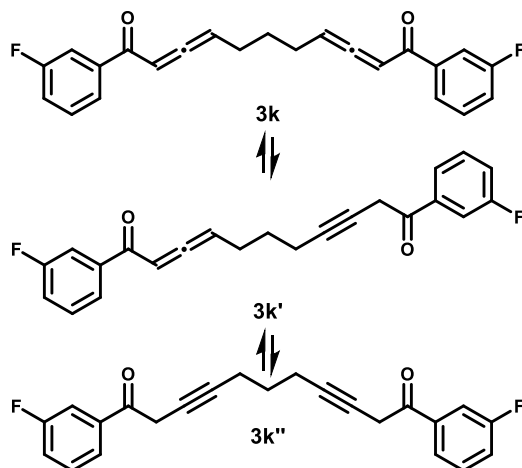

335 mg (92% yield) yellowish gummy liquid, isolated by flash column chromatography (SiO<sub>2</sub>, ethyl acetate: n-hexane, 1:5). R<sub>f</sub> = 0.3.

<sup>1</sup>H NMR (CDCl<sub>3</sub>, 600 MHz): δ 7.84 – 6.94 (m, 11H), 6.34 (m, 1H), 5.70 – 5.48 (m, 1H), 3.86 – 3.68 (m, 1H), 2.78 – 2.10 (m, 6H), 2.07 – 1.47 (m, 5H).

<sup>13</sup>C NMR (CDCl<sub>3</sub>, 151 MHz): δ 214.18, 214.16, 214.10, 192.66, 190.48, 190.30, 190.24, 163.00 (d, J<sub>FC</sub> = 246.13 Hz), 162.88 (d, J<sub>FC</sub> = 247.64 Hz), 161.78, 153.70, 139.76, 137.65, 136.10, 132.35 (d, J = 10.8 Hz), 131.65, 130.41 (d, J = 7.6 Hz), 130.09 (d, J<sub>FC</sub> = 7.6 Hz), 130.02, 128.60 (d, J = 12.6 Hz), 124.48, 124.45, 124.43, 124.41, 120.60 (d, J<sub>FC</sub> = 21.7 Hz), 120.19, 119.63 (dd, J<sub>FC</sub> = 21.3, 6.5 Hz), 116.27 (d, J<sub>FC</sub> = 21.0 Hz), 115.62, 115.47, 111.50 (d, J<sub>FC</sub> = 22.8 Hz), 99.70, 99.51, 94.75, 94.73, 94.63, 94.16, 94.06, 94.03, 85.17, 85.15, 75.68, 72.85, 72.69, 33.72, 33.60, 31.17, 27.79, 27.71, 27.66, 26.88, 26.71, 24.55, 24.27, 19.58, 19.20, 18.22, 18.03.

HRMS (ESI) m/z: [M + Na]<sup>+</sup> calcd for C<sub>23</sub>H<sub>18</sub>F<sub>2</sub>O<sub>2</sub>Na<sup>+</sup>, 387.1167; found 387.1167.

**1,11-bis(4-(trifluoromethoxy)phenyl)undeca-2,3,8,9-tetraene-1,11-dione / 1,11-bis(4-(trifluoromethoxy)phenyl)undeca-2,3-dien-8-yne-1,11-dione / 1,11-bis(4-(trifluoromethoxy)phenyl)undeca-3,8-diyne-1,11-dione (3l/3l'/3l'')**

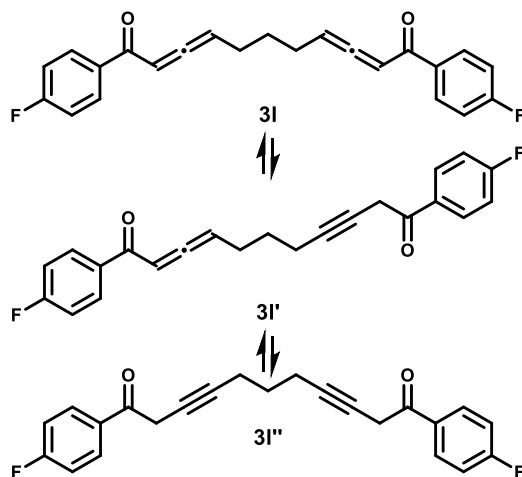

331 mg (91% yield) yellowish gummy liquid, isolated by flash column chromatography (SiO<sub>2</sub>, ethyl acetate: n-hexane, 1:5). R<sub>f</sub> = 0.3.

<sup>1</sup>H NMR (CDCl<sub>3</sub>, 600 MHz): δ 8.05 – 7.80 (m, 4H), 7.52 – 7.33 (m, 1H), 7.10 (m, 5H), 6.34 (m, 1H), 5.59 (m, 1H), 3.77 (d, *J* = 1.9 Hz, 1H), 2.33 – 2.08 (m, 4H), 1.73 – 1.46 (m, 3H).

<sup>13</sup>C NMR (CDCl<sub>3</sub>, 151 MHz): δ 213.86, 192.41, 192.33, 190.19, 189.92, 189.87, 166.02 (d, *J*<sub>FC</sub> = 256.7 Hz), 165.57 (d, *J*<sub>FC</sub> = 255.2 Hz), 134.03, 132.36 (d, *J*<sub>FC</sub> = 10.5 Hz), 132.00, 131.65 (d, *J*<sub>FC</sub> = 3.3 Hz), 131.47, 131.45, 131.41, 131.39, 131.36, 131.32, 131.29, 131.26, 131.07, 131.01, 128.61 (d, *J*<sub>FC</sub> = 12.3 Hz), 126.54, 126.48, 115.87 (d, *J*<sub>FC</sub> = 22.0 Hz), 115.52 (dd, *J*<sub>FC</sub> = 21.9, 4.5 Hz), 98.10, 94.61, 94.59, 94.46, 94.06, 94.03, 93.88, 85.00, 73.10, 72.97, 33.76, 31.00, 30.96, 28.10, 27.82, 27.72, 26.89, 26.75, 18.25.

HRMS (ESI) *m/z*: [M + Na]<sup>+</sup> calcd for C<sub>23</sub>H<sub>18</sub>F<sub>2</sub>O<sub>2</sub>Na<sup>+</sup>, 387.1167; found 387.1166.

**1,11-bis(2-chlorophenyl)undeca-2,3,8,9-tetraene-1,11-dione / 1,11-bis(2-chlorophenyl)undeca-2,3-dien-8-yne-1,11-dione / 1,11-bis(2-chlorophenyl)undeca-3,8-diyne-1,11-dione (3m/3m'/3m'')**

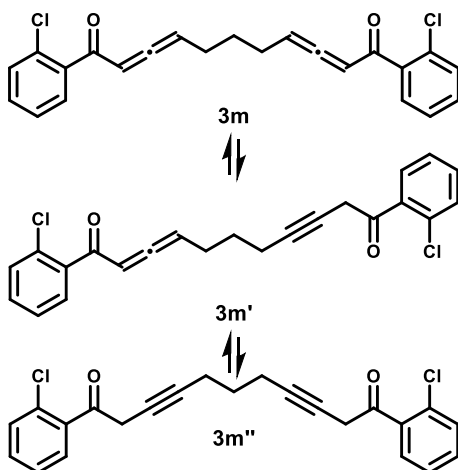

309 mg (78% yield) yellowish gummy liquid, isolated by flash column chromatography (SiO<sub>2</sub>, ethyl acetate: n-hexane, 1:5). R<sub>f</sub> = 0.3.

<sup>1</sup>H NMR (CDCl<sub>3</sub>, 600 MHz): δ 7.42 – 7.20 (m, 8H), 6.11 (m, 2H), 5.41 – 5.34 (m, 2H), 2.03 (m, 2H), 1.93 – 1.77 (m, 4H).

<sup>13</sup>C NMR (CDCl<sub>3</sub>, 151 MHz): δ 215.46, 215.41, 194.37, 194.31, 139.00, 132.20, 131.04, 131.01, 130.99, 130.93, 130.78, 130.76, 130.56, 130.47, 130.40, 129.93, 129.88, 129.86, 129.53, 128.68, 128.65, 128.61, 128.58, 127.04, 126.97, 126.42, 126.38, 103.48, 97.77, 95.24, 95.04, 94.98, 84.57, 72.52, 34.52, 27.66, 27.64, 26.43, 17.95.

HRMS (ESI) m/z: [M + Na]<sup>+</sup> calcd for C<sub>23</sub>H<sub>18</sub>Cl<sub>2</sub>O<sub>2</sub>Na<sup>+</sup>, 419.0576; found 419.0576.

**1,11-bis(3-chlorophenyl)undeca-2,3,8,9-tetraene-1,11-dione / 1,11-bis(3-chlorophenyl)undeca-2,3-dien-8-yne-1,11-dione / 1,11-bis(3-chlorophenyl)undeca-3,8-diyne-1,11-dione (3n/3n'/3n'')**

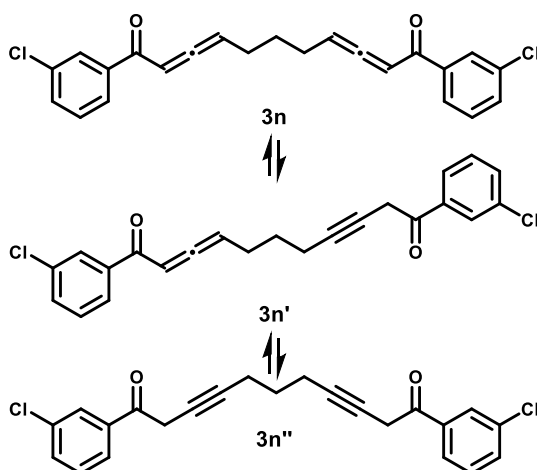

373 mg (94% yield) yellowish gummy liquid, isolated by flash column chromatography (SiO<sub>2</sub>, ethyl acetate: n-hexane, 1:5). R<sub>f</sub> = 0.3.

<sup>1</sup>H NMR (CDCl<sub>3</sub>, 600 MHz): δ 7.98 – 7.64 (m, 4H), 7.56 – 7.16 (m, 8H), 6.32 (m, 1H), 5.93 (m, 1H), 5.67 – 5.56 (m, 1H), 3.78 (m, 1H), 2.69 – 2.09 (m, 7H), 1.96 – 1.48 (m, 6H).

<sup>13</sup>C NMR (CDCl<sub>3</sub>, 151 MHz): δ 214.31, 214.29, 214.22, 192.68, 190.49, 190.42, 139.28, 139.26, 137.10, 135.69, 135.08, 134.57, 133.53, 132.61, 132.57, 130.10, 129.81, 129.77, 129.42, 129.36, 128.88, 128.60, 126.86, 126.83, 124.65, 122.69, 99.81, 99.63, 97.93, 94.81, 94.70, 94.28, 94.19, 85.26, 75.69, 75.52, 72.85, 33.76, 33.64, 31.15, 28.23, 27.87, 27.68, 27.54, 26.98, 26.77, 24.58, 24.10, 19.62, 18.28.

HRMS (ESI) m/z: [M + Na]<sup>+</sup> calcd for C<sub>23</sub>H<sub>18</sub>Cl<sub>2</sub>O<sub>2</sub>Na<sup>+</sup>, 419.0576; found 419.0575.

**1,11-bis(4-chlorophenyl)undeca-2,3,8,9-tetraene-1,11-dione / 1,11-bis(4-chlorophenyl)undeca-2,3-dien-8-yne-1,11-dione / 1,11-bis(4-chlorophenyl)undeca-3,8-diyne-1,11-dione (3o/3o'/3o'')**

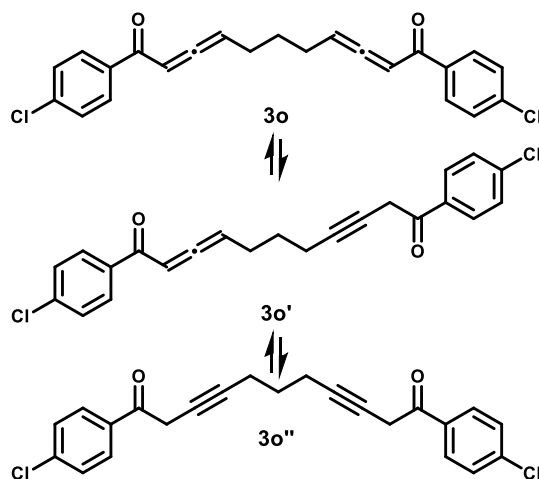

377 mg (95% yield) yellowish gummy liquid, isolated by flash column chromatography (SiO<sub>2</sub>, ethyl acetate: n-hexane, 1:5). R<sub>f</sub> = 0.3.

<sup>1</sup>H NMR (CDCl<sub>3</sub>, 600 MHz): δ 7.93 – 7.69 (m, 5H), 7.46 – 7.26 (m, 10H), 6.34 (m, 1H), 5.95 – 5.84 (m, 1H), 5.67 – 5.54 (m, 1H), 3.77 (m, 1H), 2.67 – 2.10 (m, 11H), 1.95 – 1.46 (m, 10H).

<sup>13</sup>C NMR (CDCl<sub>3</sub>, 151 MHz): δ 214.02, 192.72, 190.34, 140.09, 139.15, 136.02, 135.40, 133.88, 132.41, 132.34, 130.19, 130.15, 130.13, 129.92, 129.03, 129.00, 128.75, 128.72, 128.67, 128.58, 128.49, 125.81, 125.77, 98.82, 97.57, 94.71, 94.69, 94.57, 94.14, 93.98, 93.93, 85.11, 75.75, 72.99, 33.75, 31.07, 28.10, 28.06, 27.79, 27.69, 26.89, 26.75, 24.57, 19.60, 18.26.

HRMS (ESI) m/z: [M + Na]<sup>+</sup> calcd for C<sub>23</sub>H<sub>18</sub>Cl<sub>2</sub>O<sub>2</sub>Na<sup>+</sup>, 419.0576; found 419.0577.

**1,11-bis(2,4-dichlorophenyl)undeca-2,3,8,9-tetraene-1,11-dione / 1,11-bis(2,4-dichlorophenyl)undeca-2,3-dien-8-yne-1,11-dione / 1,11-bis(2,4-dichlorophenyl)undeca-3,8-diyne-1,11-dione (3p/3p'/3p'')**

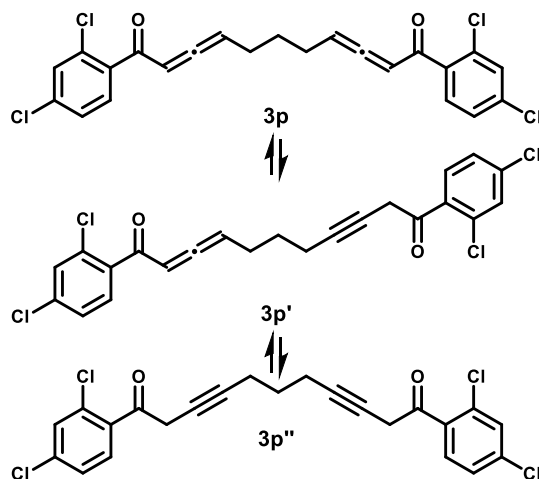

340 mg (73% yield) yellowish gummy liquid, isolated by flash column chromatography (SiO<sub>2</sub>, ethyl acetate: n-hexane, 1:5). R<sub>f</sub> = 0.3.

<sup>1</sup>H NMR (CDCl<sub>3</sub>, 600 MHz): δ 7.47 – 7.37 (m, 4H), 7.36 – 7.22 (m, 8H), 6.16 – 6.08 (m, 3H), 5.44 (m, 5H), 2.66 – 1.74 (m, 8H), 1.71 – 1.28 (m, 4H).

<sup>13</sup>C NMR (CDCl<sub>3</sub>, 151 MHz): δ 215.49, 215.47, 193.19, 137.42, 137.40, 136.55, 131.98, 130.38, 129.94, 129.84, 129.79, 129.74, 127.33, 126.94, 126.92, 126.89, 104.05, 97.77, 97.74, 95.55, 95.30, 95.27, 95.10, 34.58, 33.78, 33.60, 28.11, 27.75, 27.72, 27.39, 27.13, 26.55, 26.54, 26.37, 26.29, 24.53, 23.80, 19.51, 18.75, 18.04.

HRMS (ESI) m/z: [M + Na]<sup>+</sup> calcd for C<sub>23</sub>H<sub>16</sub>Cl<sub>4</sub>O<sub>2</sub>Na<sup>+</sup>, 486.9797; found 486.9789.

**1,11-bis(3-bromophenyl)undeca-2,3,8,9-tetraene-1,11-dione / 1,11-bis(3-bromophenyl)undeca-2,3-dien-8-yne-1,11-dione / 1,11-bis(3-bromophenyl)undeca-3,8-diyne-1,11-dione (3q/3q'/3q'')**



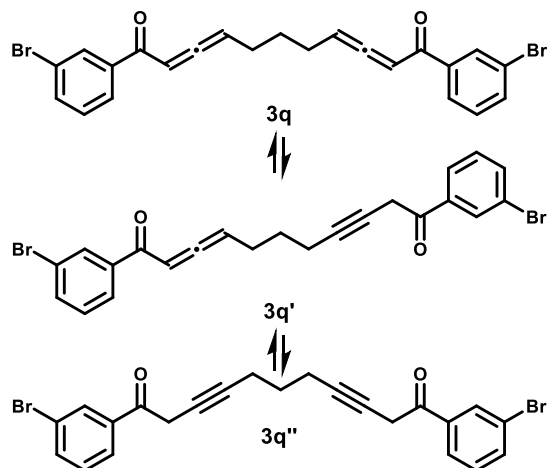

452 mg (93% yield) yellowish gummy liquid, isolated by flash column chromatography (SiO<sub>2</sub>, ethyl acetate: n-hexane, 1:5). R<sub>f</sub> = 0.3.

<sup>1</sup>H NMR (CDCl<sub>3</sub>, 600 MHz): δ 7.96 (m, 1H), 7.89 (dt, *J* = 7.8, 1.5 Hz, 1H), 7.78 – 7.60 (m, 3H), 7.53 (q, *J* = 2.0 Hz, 1H), 7.44 (m, 1H), 7.37 – 7.27 (m, 3H), 7.20 (m, 1H), 6.29 (m, 1H), 5.97 – 5.88 (m, 1H), 5.66 – 5.54 (m, 1H), 3.81 – 3.73 (m, 1H), 2.71 – 2.38 (m, 4H), 2.36 – 2.13 (m, 4H), 1.92 – 1.53 (m, 6H).

<sup>13</sup>C NMR (CDCl<sub>3</sub>, 151 MHz): δ 214.31, 214.30, 192.57, 190.40, 190.34, 139.48, 139.46, 139.45, 137.27, 136.43, 135.92, 135.51, 135.47, 132.41, 132.33, 132.27, 131.80, 131.77, 130.34, 130.30, 130.27, 130.07, 127.52, 127.50, 127.30, 127.24, 123.14, 123.05, 123.02, 122.56, 99.84, 99.66, 97.95, 94.81, 94.70, 94.27, 94.16, 85.27, 75.67, 72.84, 33.76, 31.12, 28.02, 27.87, 27.67, 26.98, 26.76, 24.57, 19.61, 18.28.

HRMS (ESI) *m/z*: [M + Na]<sup>+</sup> calcd for C<sub>23</sub>H<sub>18</sub>Br<sub>2</sub>O<sub>2</sub>Na<sup>+</sup>, 506.9566; found 506.9564.

**1,11-bis(4-bromophenyl)undeca-2,3,8,9-tetraene-1,11-dione / 1,11-bis(4-bromophenyl)undeca-2,3-dien-8-yne-1,11-dione / 1,11-bis(4-bromophenyl)undeca-3,8-diyne-1,11-dione (3r/3r'/3r'')**

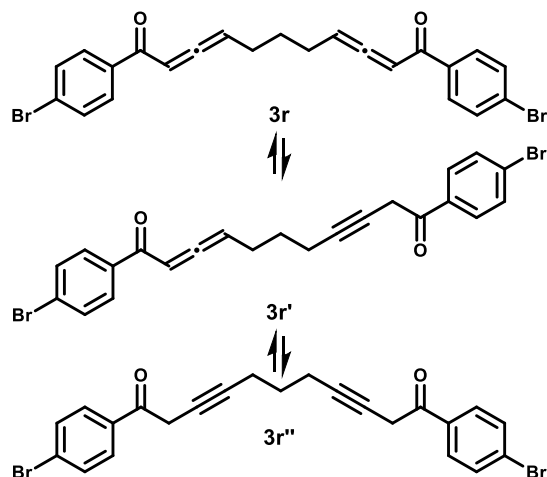

462 mg (95% yield) yellowish gummy liquid, isolated by flash column chromatography (SiO<sub>2</sub>, ethyl acetate: n-hexane, 1:5). R<sub>f</sub> = 0.3.

**<sup>1</sup>H NMR** (CDCl<sub>3</sub>, 600 MHz): δ 7.87 – 7.79 (m, 1H), 7.76 – 7.67 (m, 3H), 7.63 – 7.51 (m, 4H), 7.49 – 7.41 (m, 2H), 7.30 – 7.26 (m, 1H), 6.33 (m, 1H), 5.67 – 5.53 (m, 1H), 3.77 (t, *J* = 2.5 Hz, 1H), 2.67 – 2.35 (m, 3H), 2.33 – 2.11 (m, 4H), 1.95 – 1.46 (m, 6H).

**<sup>13</sup>C NMR** (CDCl<sub>3</sub>, 151 MHz): δ 214.06, 192.92, 190.81, 190.54, 190.47, 136.46, 134.30, 132.81, 132.43, 132.10, 131.96, 131.75, 131.72, 131.66, 130.32, 130.28, 130.02, 128.86, 128.68, 128.60, 127.83, 127.75, 126.05, 126.02, 98.92, 94.92, 94.75, 94.72, 94.60, 94.16, 94.12, 94.01, 93.94, 85.15, 72.98, 33.76, 31.07, 31.01, 27.79, 27.69, 26.90, 26.75, 24.58, 19.63, 19.26, 18.27.

**HRMS** (ESI) *m/z*: [M + Na]<sup>+</sup> calcd for C<sub>23</sub>H<sub>18</sub>Br<sub>2</sub>O<sub>2</sub>Na<sup>+</sup>, 506.9566; found 506.9565.

**1,11-bis(4-iodophenyl)undeca-2,3,8,9-tetraene-1,11-dione / 1,11-bis(4-iodophenyl)undeca-2,3-dien-8-yne-1,11-dione / 1,11-bis(4-iodophenyl)undeca-3,8-diyne-1,11-dione (3s/3s'/3s'')**

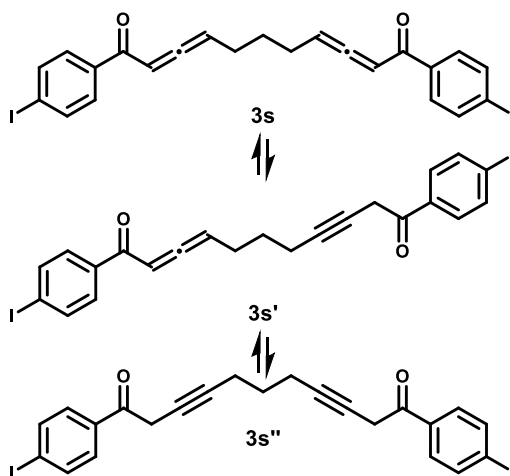

400 mg (69% yield) yellowish gummy liquid, isolated by flash column chromatography (SiO<sub>2</sub>, ethyl acetate: n-hexane, 1:5). R<sub>f</sub> = 0.3.

**<sup>1</sup>H NMR** (CDCl<sub>3</sub>, 600 MHz): δ 7.86 – 7.48 (m, 16H), 7.44 (m, 1H), 7.20 – 7.08 (m, 2H), 6.32 (m, 1H), 5.97 – 5.86 (m, 1H), 5.60 (m, 1H), 3.76 (m, 1H), 3.08 – 2.83 (m, 1H), 2.72 – 2.06 (m, 10H), 1.92 – 1.47 (m, 8H).

**<sup>13</sup>C NMR** (CDCl<sub>3</sub>, 151 MHz): δ 214.06, 190.74, 170.54, 138.11, 138.03, 137.95, 137.91, 137.75, 137.71, 137.01, 134.84, 133.39, 132.43, 132.36, 131.66, 130.23, 130.18, 130.16, 130.10, 129.85, 128.68, 128.59, 126.21, 126.13, 101.72, 100.52, 98.97, 95.41, 94.75, 94.72, 94.60, 94.13, 93.98, 93.90, 33.75, 30.96, 29.81, 28.11, 27.79, 27.69, 27.60, 26.89, 26.75, 24.58, 24.09, 21.67, 19.63.

**HRMS** (ESI) m/z: [M + Na]<sup>+</sup> calcd for C<sub>23</sub>H<sub>18</sub>I<sub>2</sub>O<sub>2</sub>Na<sup>+</sup>, 602.9288; found 602.9286.

**dimethyl 4,4'-(undeca-2,3,8,9-tetraenedioyl)dibenzoate / dimethyl 4,4'-(undeca-2,3-dien-8-ynedioyl)dibenzoate / dimethyl 4,4'-(undeca-3,8-diynedioyl)dibenzoate (3t/3t'/3t'')**

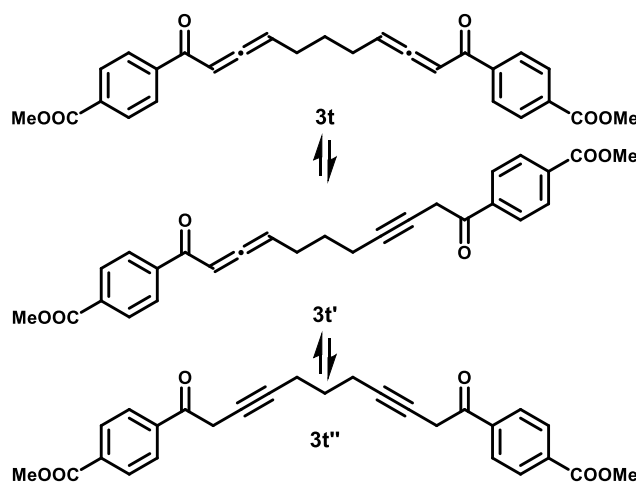

320 mg (72% yield) yellow gummy liquid, isolated by flash column chromatography (SiO<sub>2</sub>, ethyl acetate: n-hexane, 1:3). R<sub>f</sub> = 0.3.

**<sup>1</sup>H NMR** (CDCl<sub>3</sub>, 600 MHz): δ 8.12 – 7.94 (m, 7H), 7.88 – 7.81 (m, 3H), 6.36 – 6.28 (m, 1H), 5.65 – 5.54 (m, 1H), 3.97 (d, *J* = 3.4 Hz, 1H), 3.94 – 3.87 (m, 8H), 3.82 (t, *J* = 2.4 Hz, 1H), 2.29 – 2.11 (m, 5H), 1.64 – 1.50 (m, 3H).

**<sup>13</sup>C NMR** (CDCl<sub>3</sub>, 151 MHz): δ 214.44, 214.40, 193.42, 191.64, 191.37, 191.28, 166.37, 166.32, 166.17, 141.26, 141.21, 141.18, 139.52, 138.75, 134.28, 133.45, 133.39, 130.16, 130.03, 129.97, 129.89, 129.61, 129.58, 129.55, 128.63, 128.61, 128.58, 128.55, 128.53, 128.47, 128.35, 124.32, 124.30, 95.06, 94.77, 94.74, 94.65, 94.54, 94.41, 94.34, 85.19, 72.82, 52.57, 52.48, 48.94, 31.26, 28.12, 27.72, 27.60, 27.52, 27.11, 26.81, 26.66, 18.19.

**HRMS** (ESI)  $m/z$ :  $[M + Na]^+$  calcd for  $C_{27}H_{24}O_6Na^+$ , 467.1465; found 467.1456.

**1,11-bis(4-(trifluoromethyl)phenyl)undeca-2,3,8,9-tetraene-1,11-dione / 1,11-bis(4-(trifluoromethyl)phenyl)undeca-2,3-dien-8-yne-1,11-dione / 1,11-bis(4-(trifluoromethyl)phenyl)undeca-3,8-diyne-1,11-dione (3u/3u'/3u'')**

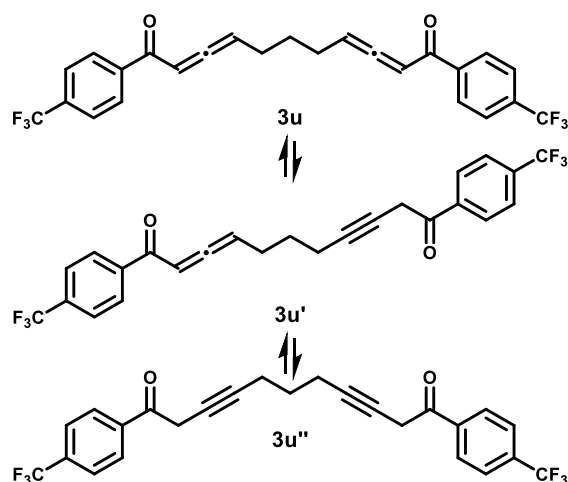

408 mg (88% yield) yellow gummy liquid, isolated by flash column chromatography ( $SiO_2$ , ethyl acetate: n-hexane, 1:6).  $R_f = 0.3$ .

**$^1H$  NMR** ( $CDCl_3$ , 600 MHz):  $\delta$  8.07 (m, 1H), 7.93 (dd,  $J = 8.4, 3.6$  Hz, 3H), 7.76 – 7.46 (m, 11H), 6.35 (m, 2H), 6.06 – 5.96 (m, 2H), 5.70 – 5.57 (m, 1H), 3.84 (m, 2H), 2.71 – 2.12 (m, 7H), 1.99 – 1.48 (m, 5H).

**$^{13}C$  NMR** ( $CDCl_3$ , 151 MHz):  $\delta$  214.56, 214.53, 214.51, 214.40, 192.94, 191.18, 190.85, 190.78, 140.63, 138.26, 137.25, 134.01 (d,  $J_{FC} = 32.9$  Hz), 131.15 (q,  $J_{FC} = 32.7$  Hz), 129.07, 129.04, 128.99, 128.76 (d,  $J_{FC} = 21.3$  Hz), 127.12, 126.58 (d,  $J_{FC} = 32.2$  Hz), 125.88, 125.85, 125.83, 125.80, 125.52, 125.49, 125.46, 125.43, 124.88, 124.80, 124.77, 124.75, 122.97 (d,  $J_{FC} = 32.5$  Hz), 100.62, 98.47, 94.91, 94.52, 94.27, 85.36, 75.67, 75.50, 72.68, 33.75, 33.63, 31.25, 28.20, 28.13, 27.99, 27.76, 27.65, 26.86, 26.84, 26.71, 24.58, 24.26, 19.62.

**HRMS** (ESI)  $m/z$ :  $[M + Na]^+$  calcd for  $C_{25}H_{18}F_6O_2Na^+$ , 487.1103; found 487.1099.

**1,11-di(naphthalen-2-yl)undeca-2,3,8,9-tetraene-1,11-dione / 1,11-di(naphthalen-2-yl)undeca-2,3-dien-8-yne-1,11-dione / 1,11-di(naphthalen-2-yl)undeca-3,8-diyne-1,11-dione (3v/3v'/3v'')**

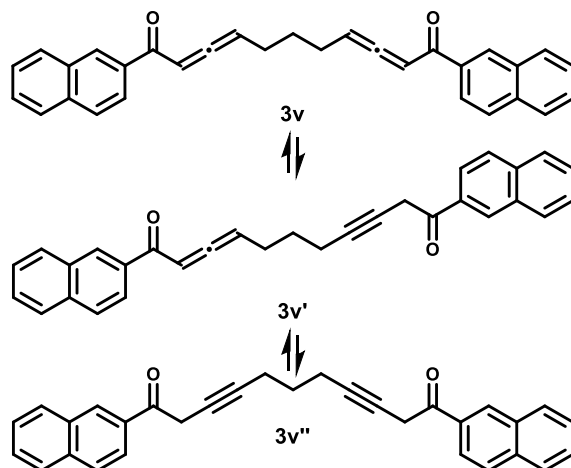

390 mg (91% yield) yellow gummy liquid, isolated by flash column chromatography (SiO<sub>2</sub>, ethyl acetate: n-hexane, 1:5). R<sub>f</sub> = 0.3.

**<sup>1</sup>H NMR** (CDCl<sub>3</sub>, 600 MHz): δ 8.39 – 8.29 (m, 1H), 8.08 – 7.76 (m, 9H), 7.62 – 7.41 (m, 5H), 6.52 – 6.43 (m, 1H), 5.61 – 5.55 (m, 1H), 3.97 – 3.89 (m, 1H), 2.65 – 2.41 (m, 1H), 2.36 – 2.14 (m, 4H), 1.78 – 1.55 (m, 3H).

**<sup>13</sup>C NMR** (CDCl<sub>3</sub>, 151 MHz): δ 213.96, 213.93, 213.90, 193.88, 191.62, 191.47, 191.34, 135.81, 135.46, 135.06, 135.03, 132.92, 132.51, 132.43, 132.42, 130.60, 130.58, 130.22, 130.20, 130.18, 129.76, 129.73, 129.71, 129.57, 129.54, 129.50, 128.79, 128.77, 128.66, 128.60, 128.58, 128.37, 128.34, 128.32, 128.29, 127.89, 127.88, 127.86, 127.76, 126.97, 126.95, 126.82, 126.80, 126.76, 124.76, 124.70, 124.67, 124.23, 124.21, 94.52, 94.48, 94.36, 94.25, 94.17, 94.08, 84.97, 73.48, 31.11, 31.09, 27.93, 27.91, 27.84, 27.78, 26.98, 26.94, 26.80, 18.35, 18.11.

**HRMS** (ESI) m/z: [M + Na]<sup>+</sup> calcd for C<sub>31</sub>H<sub>24</sub>O<sub>2</sub>Na<sup>+</sup>, 451.1669; found 451.1664.

**1,11-di(thiophen-2-yl)undeca-2,3,8,9-tetraene-1,11-dione / 1,11-di(thiophen-2-yl)undeca-2,3-dien-8-yne-1,11-dione / 1,11-di(thiophen-2-yl)undeca-3,8-diyne-1,11-dione (3w/3w'/3w'')**

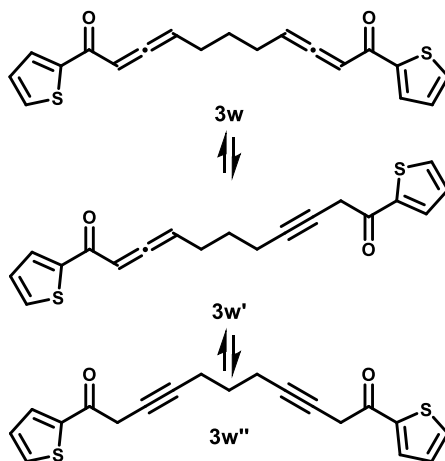

327 mg (96% yield) yellowish gummy liquid, isolated by flash column chromatography (SiO<sub>2</sub>, ethyl acetate: n-hexane, 1:5). R<sub>f</sub> = 0.3.

<sup>1</sup>H NMR (CDCl<sub>3</sub>, 600 MHz): δ 7.85 – 7.40 (m, 5H), 7.10 (m, 2H), 6.31 (m, 1H), 5.70 (m, 1H), 3.74 (d, *J* = 2.7 Hz, 1H), 2.68 – 2.46 (m, 1H), 2.29 (m, 4H), 1.70 (m, 3H).

<sup>13</sup>C NMR (CDCl<sub>3</sub>, 151 MHz): δ 212.78, 212.74, 212.71, 186.81, 182.66, 182.55, 182.53, 143.69, 143.67, 143.65, 142.48, 134.36, 133.66, 133.62, 133.07, 133.04, 132.49, 132.46, 132.44, 132.36, 132.29, 131.64, 131.62, 128.63, 128.55, 128.32, 128.25, 127.99, 127.92, 95.43, 95.33, 94.47, 94.41, 94.38, 94.34, 84.61, 73.08, 31.52, 31.49, 27.60, 27.57, 27.05, 27.03, 26.83, 18.33, 18.07.

HRMS (ESI) *m/z*: [M + Na]<sup>+</sup> calcd for C<sub>19</sub>H<sub>16</sub>O<sub>2</sub>S<sub>2</sub>Na<sup>+</sup>, 363.0484; found 363.0480.

**1,11-dicyclopropylundeca-2,3,8,9-tetraene-1,11-dione / 1,11-dicyclopropylundeca-2,3-dien-8-yne-1,11-dione / 1,11-dicyclopropylundeca-3,8-diyne-1,11-dione (3x/3x'/3x'')**

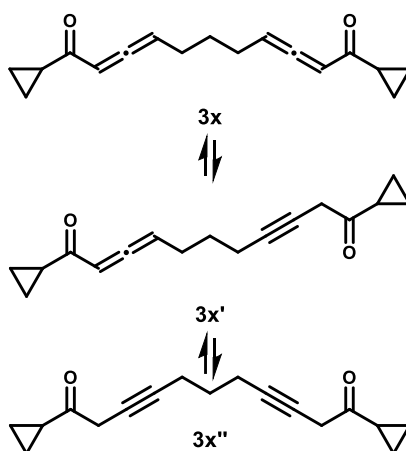

210 mg (82% yield) colorless gummy liquid, isolated by flash column chromatography (SiO<sub>2</sub>, ethyl acetate: n-hexane, 1:1). R<sub>f</sub> = 0.3.

**<sup>1</sup>H NMR** (CDCl<sub>3</sub>, 600 MHz): δ 5.78 (m, 2H), 5.65 (m, 2H), 2.36 – 2.15 (m, 6H), 1.73 – 1.59 (m, 2H), 1.02 – 0.91 (m, 4H), 0.85 – 0.74 (m, 4H).

**<sup>13</sup>C NMR** (CDCl<sub>3</sub>, 151 MHz): δ 213.10, 200.10, 98.30, 98.26, 94.93, 94.91, 83.78, 73.26, 34.83, 34.73, 27.89, 27.84, 27.80, 27.75, 27.37, 27.06, 27.04, 26.77, 23.53, 19.21, 18.24, 17.54, 17.47, 17.43, 17.38, 11.62, 10.97, 10.91.

**HRMS** (ESI) m/z: [M + Na]<sup>+</sup> calcd for C<sub>17</sub>H<sub>20</sub>O<sub>2</sub>Na<sup>+</sup>, 279.1356; found 279.1353.

## 2.2 Optimization of the reaction conditions

Table S2 Optimization of the reaction conditions

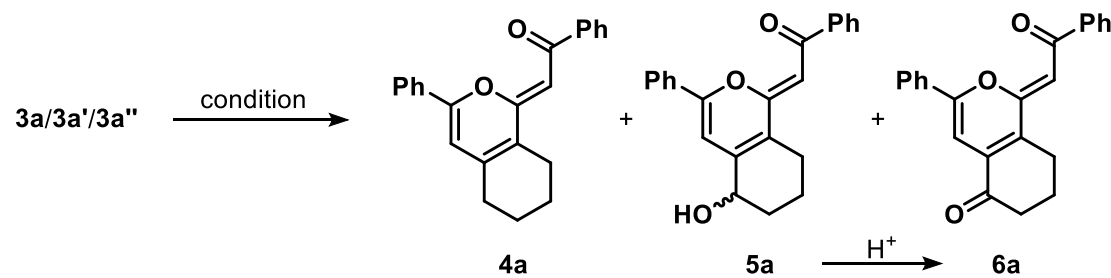

| Entry | Additive                                                   | Atmosphere | Solvent | Temperature | Time  | Yield <sup>b</sup> |    |       |
|-------|------------------------------------------------------------|------------|---------|-------------|-------|--------------------|----|-------|
|       |                                                            |            |         |             |       | 4a                 | 6a | total |
| 1     | Na <sub>2</sub> S (30 mol%)/ H <sub>2</sub> O              | air        | THF     | rt          | 3 h   | 53                 | 25 | 78    |
| 2     | K <sub>2</sub> CO <sub>3</sub> (30 mol%)/ H <sub>2</sub> O | air        | THF     | rt          | 3 h   | 0                  | 0  | 0     |
| 3     | KOH (30 mol%)/ H <sub>2</sub> O                            | air        | THF     | rt          | 2 h   | 62                 | 17 | 79    |
| 4     | t-BuOK (30 mol%)                                           | air        | THF     | rt          | 0.2 h | 59                 | 2  | 61    |
| 5     | 4 + one drop of water                                      | air        | THF     | rt          | 0.2 h | 59                 | 11 | 70    |
| 6     | Et <sub>3</sub> N (30 mol%)                                | air        | THF     | rt          | 3 h   | 0                  | 0  | 0     |
| 7     | PPh <sub>3</sub> (30 mol%)                                 | air        | THF     | rt          | 3 h   | 0                  | 0  | 0     |
| 8     | Na <sub>2</sub> S (20 mol%)/ H <sub>2</sub> O              | air        | THF     | rt          | 3.5 h | 51                 | 23 | 74    |
| 9     | Na <sub>2</sub> S (40 mol%)/ H <sub>2</sub> O              | air        | THF     | rt          | 2.5 h | 55                 | 20 | 75    |
| 10    | Na <sub>2</sub> S (30 mol%)                                | air        | THF     | rt          | 3 h   | 0                  | 0  | 0     |



|    |                                                               |                |                    |        |                  |    |    |    |
|----|---------------------------------------------------------------|----------------|--------------------|--------|------------------|----|----|----|
| 11 | H <sub>2</sub> O (30 mol%)                                    | air            | THF                | rt     | 3 h              | 0  | 0  | 0  |
| 12 | KOH (30 mol%)/ H <sub>2</sub> O                               | N <sub>2</sub> | THF                | rt     | 2 h              | 83 | 2  | 85 |
| 13 | KOH (30 mol%)/ H <sub>2</sub> O                               | N <sub>2</sub> | DCM                | rt     | 5 h              | 81 | 3  | 84 |
| 14 | KOH (30 mol%)/ H <sub>2</sub> O                               | N <sub>2</sub> | PhMe               | rt     | 5 h              | 82 | 3  | 85 |
| 15 | KOH (30 mol%)/ H <sub>2</sub> O                               | N <sub>2</sub> | CH <sub>3</sub> CN | rt     | 2 h              | 75 | 4  | 79 |
| 16 | KOH (30 mol%)/ H <sub>2</sub> O                               | N <sub>2</sub> | EA                 | rt     | 3 h              | 82 | 4  | 86 |
| 17 | KOH (30 mol%)/ H <sub>2</sub> O                               | N <sub>2</sub> | THF                | 50 °C  | 1 h              | 84 | 2  | 86 |
| 18 | KOH (30 mol%)/ H <sub>2</sub> O                               | N <sub>2</sub> | THF                | reflux | 1 h              | 83 | 2  | 85 |
| 19 | Na <sub>2</sub> S (30 mol%)/ H <sub>2</sub> O                 | air            | THF                | rt     | 5 h              | 35 | 41 | 76 |
| 20 | Na <sub>2</sub> S (30 mol%)/ H <sub>2</sub> O                 | air            | THF                | rt     | 8 h              | 13 | 64 | 77 |
| 21 | Na <sub>2</sub> S (30 mol%)/ H <sub>2</sub> O                 | air            | THF                | rt     | 10 h             | 12 | 64 | 76 |
| 22 | Na <sub>2</sub> S (30 mol%)/ H <sub>2</sub> O                 | air            | EA                 | rt     | 10 h             | 11 | 72 | 83 |
| 23 | Na <sub>2</sub> S (30 mol%)/ H <sub>2</sub> O                 | air            | CH <sub>3</sub> CN | rt     | 8 h              | 13 | 63 | 76 |
| 24 | Na <sub>2</sub> S (30 mol%)/ H <sub>2</sub> O                 | air            | DCM                | rt     | 12 h             | 12 | 56 | 68 |
| 25 | Na <sub>2</sub> S (30 mol%)/ H <sub>2</sub> O                 | air            | PhMe               | rt     | 12 h             | 14 | 59 | 73 |
| 26 | Na <sub>2</sub> S (30 mol%)/ H <sub>2</sub> O                 | air            | EA                 | 50 °C  | 8 h              | 6  | 78 | 84 |
| 27 | Na <sub>2</sub> S (30 mol%)/ H <sub>2</sub> O                 | air            | EA                 | reflux | 8 h              | 5  | 76 | 81 |
| 28 | Na <sub>2</sub> S (30 mol%)/ H <sub>2</sub> O                 | O <sub>2</sub> | EA                 | 50 °C  | 8 h              | 4  | 75 | 79 |
| 29 | Na <sub>2</sub> S (30 mol%)/ H <sub>2</sub> O                 | N <sub>2</sub> | THF                | 50 °C  | 2 h              | 79 | 5  | 84 |
| 30 | KOH (30 mol%)/ H <sub>2</sub> O                               | air            | EA                 | 50 °C  | 5 h <sup>c</sup> | 12 | 67 | 79 |
| 31 | NaOH (30 mol%)/ H <sub>2</sub> O                              | air            | EA                 | 50 °C  | 5 h <sup>c</sup> | 9  | 71 | 80 |
| 32 | (NH <sub>4</sub> ) <sub>2</sub> S (30 mol%)/ H <sub>2</sub> O | air            | EA                 | 50 °C  | 8 h              | 0  | 0  | 0  |
| 33 | NaHS (30 mol%)/ H <sub>2</sub> O                              | air            | EA                 | 50 °C  | 8 h              | 0  | 0  | 0  |

<sup>a</sup> Reaction conditions: **3a/3a'/3a''** (0.50 mmol), solvent (5.0 mL). <sup>b</sup> Isolated yield. <sup>c</sup> After 5 hours, the yield of the products no longer changed.

### 2.3 Synthesis and characterization of product 4

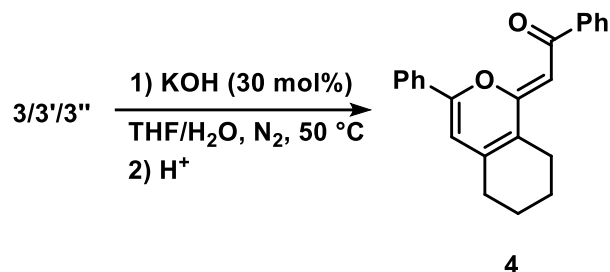

**General Procedures:** A 25 mL round-bottomed flask was charged with 0.5 mmol of the freshly prepared raw material **3**, followed by the addition of 5 mL of anhydrous tetrahydrofuran (THF). The resulting solution was stirred under a nitrogen ( $\text{N}_2$ ) atmosphere at 50  $^\circ\text{C}$ . Subsequently, 1 mL of an aqueous potassium hydroxide (KOH) solution (8.4 mg KOH in 1 mL water, 0.15 mmol) was added to the reaction mixture. The progress of the reaction was monitored using thin-layer chromatography (TLC). Upon completion, the reaction mixture was cooled to room temperature and neutralized by the cautious addition of 2 mL of hydrochloric acid (10 mol/L). The product was then extracted into dichloromethane (DCM) using three portions ( $3 \times 3$  mL). The combined organic phases were washed with saturated sodium chloride solution, dried over magnesium sulfate ( $\text{MgSO}_4$ ), filtered, and the solvent was removed under reduced pressure. The crude product was purified by column chromatography, employing a gradient elution with a mixture of ethyl acetate and n-hexane (starting from 1:20 to 1:6) to afford the desired product **4**.

#### (Z)-1-phenyl-2-(3-phenyl-5,6,7,8-tetrahydro-1H-isochromen-1-ylidene)ethan-1-one (**4a**)

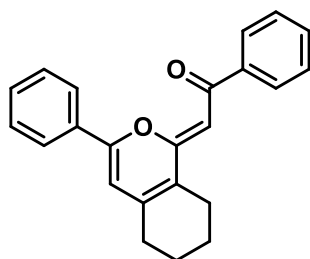

138 mg (84% yield) yellow solid, purified by flash column chromatography ( $\text{SiO}_2$ , ethyl acetate: n-hexane, 1:10).  $R_f = 0.3$ .

**m.p.** = 165.8-166.2  $^\circ\text{C}$

**$^1\text{H NMR}$**  ( $\text{CDCl}_3$ , 600 MHz):  $\delta$  8.16 (dd,  $J = 7.2, 1.4$  Hz, 2H), 7.97 – 7.94 (m, 2H), 7.51 – 7.39 (m, 6H), 6.45 (s, 1H), 6.04 (s, 1H), 2.52 (t,  $J = 6.1$  Hz, 2H), 2.38 (t,  $J = 6.3$  Hz, 2H), 1.87 – 1.76 (m, 4H).

$^{13}\text{C}$  NMR ( $\text{CDCl}_3$ , 101 MHz):  $\delta$  186.8, 160.0, 150.3, 143.4, 141.7, 132.1, 130.8, 130.2, 129.0, 128.3, 127.5, 124.8, 123.2, 107.9, 92.0, 30.3, 24.6, 22.7, 21.6.

HRMS (ESI)  $m/z$ :  $[\text{M}+\text{H}]^+$  calcd for  $\text{C}_{23}\text{H}_{21}\text{O}_2^+$ , 329.1536; found 329.1520.

IR (neat)  $\nu$  ( $\text{cm}^{-1}$ ): 3053, 2927, 2860, 1643, 1616, 1563, 1478, 1258, 1211, 984.

**(Z)-1-(2-methoxyphenyl)-2-(3-(2-methoxyphenyl)-5,6,7,8-tetrahydro-1H-isochromen-1-ylidene)ethan-1-one (4b)**

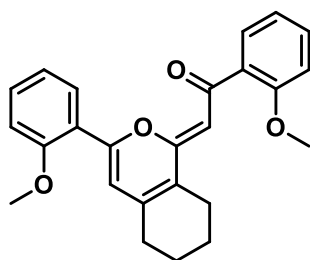

137mg (71% yield) yellow solid, purified by flash column chromatography ( $\text{SiO}_2$ , ethyl acetate:

n-hexane, 1: 6).  $R_f$  = 0.25.

**m.p.** = 86.7-88.0  $^\circ\text{C}$

$^1\text{H}$  NMR ( $\text{CDCl}_3$ , 600 MHz):  $\delta$  8.69 (d,  $J$  = 7.9 Hz, 1H), 7.63 (dd,  $J$  = 7.5, 1.8 Hz, 1H), 7.34 (ddd,  $J$  = 8.7, 7.4, 1.8 Hz, 2H), 7.19 – 7.12 (m, 1H), 7.03 – 6.96 (m, 2H), 6.93 (ddd,  $J$  = 8.3, 6.3, 1.0 Hz, 2H), 5.92 (s, 1H), 3.93 (s, 3H), 3.86 (s, 3H), 2.49 (t,  $J$  = 6.1 Hz, 2H), 2.30 (t,  $J$  = 6.3 Hz, 2H), 1.83 – 1.72 (m, 4H).

$^{13}\text{C}$  NMR ( $\text{CDCl}_3$ , 151 MHz):  $\delta$  187.9, 162.7, 157.2, 157.0, 151.4, 143.8, 133.5, 130.8, 129.8, 129.4, 122.8, 121.8, 120.7, 120.3, 111.6, 110.9, 110.1, 95.8, 55.9, 55.5, 30.2, 24.0, 22.3, 21.7.

HRMS (ESI)  $m/z$ :  $[\text{M}+\text{Na}]^+$  calcd for  $\text{C}_{25}\text{H}_{24}\text{O}_4\text{Na}^+$ , 411.1566; found 411.1562.

IR (neat)  $\nu$  ( $\text{cm}^{-1}$ ): 3067, 2920, 1640, 1614, 1593, 1569, 1484, 1242, 1159, 1019.

**(Z)-1-(3-methoxyphenyl)-2-(3-(3-methoxyphenyl)-5,6,7,8-tetrahydro-1H-isochromen-1-ylidene)ethan-1-one (4c)**

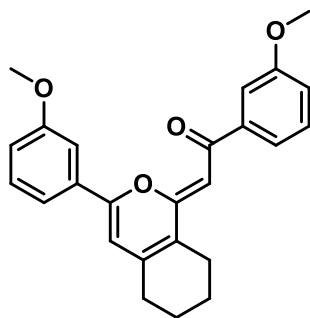

165 mg (85% yield) yellow solid, purified by flash column chromatography (SiO<sub>2</sub>, Ethyl acetate: n-hexane, 1:4). R<sub>f</sub> = 0.25.

**m.p.** = 158.9-159.2 °C

**<sup>1</sup>H NMR** (CDCl<sub>3</sub>, 600 MHz): δ 7.86 (dd, *J* = 2.6, 1.6 Hz, 1H), 7.71 (ddd, *J* = 7.8, 1.6, 0.9 Hz, 1H), 7.54 – 7.49 (m, 2H), 7.38 (t, *J* = 8.0 Hz, 1H), 7.33 (t, *J* = 7.8 Hz, 1H), 7.00 (ddd, *J* = 8.2, 2.6, 1.0 Hz, 1H), 6.97 (ddd, *J* = 8.2, 2.6, 0.9 Hz, 1H), 6.40 (s, 1H), 6.01 (s, 1H), 3.97 (s, 3H), 3.87 (s, 3H), 2.49 (t, *J* = 5.9 Hz, 2H), 2.35 (t, *J* = 6.1 Hz, 2H), 1.85 – 1.81 (m, 2H), 1.78 – 1.74 (m, 2H).

**<sup>13</sup>C NMR** (CDCl<sub>3</sub>, 151 MHz): δ 186.7, 163.3, 160.1, 159.7, 154.1, 143.7, 143.4, 133.0, 129.9, 129.2, 123.3, 119.9, 117.6, 117.0, 116.6, 112.4, 112.4, 110.2, 104.6, 91.3, 55.7, 55.5, 29.9, 24.1, 22.1, 21.6.

**HRMS** (ESI) *m/z*: [M+Na]<sup>+</sup> calcd for C<sub>25</sub>H<sub>24</sub>O<sub>4</sub>Na<sup>+</sup>, 411.1566; found 411.1558.

**IR** (neat) *v* (cm<sup>-1</sup>): 3060, 2987, 2927, 1643, 1620, 1565, 1501, 1246, 1042.

**(Z)-1-(4-methoxyphenyl)-2-(3-(4-methoxyphenyl)-5,6,7,8-tetrahydro-1H-isochromen-1-ylidene)ethan-1-one (4d)**

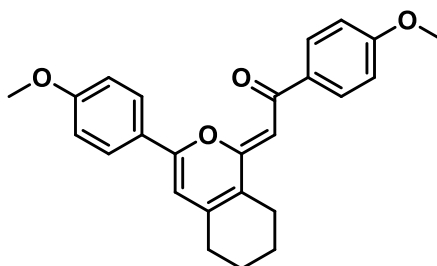

167 mg (86% yield) orange solid, purified by flash column chromatography (SiO<sub>2</sub>, Ethyl acetate: n-hexane, 1:6). R<sub>f</sub> = 0.20.

**m.p.** = 158.5-159.4 °C

**<sup>1</sup>H NMR** (CDCl<sub>3</sub>, 600 MHz): δ 8.13 – 8.09 (m, 2H), 7.96 – 7.93 (m, 2H), 7.01 – 6.98 (m, 2H), 6.94 – 6.91 (m, 2H), 6.28 (s, 1H), 5.98 (s, 1H), 2.47 (t, *J* = 6.3 Hz, 2H), 2.34 (t, *J* = 6.3 Hz, 2H), 1.85 – 1.80 (m, 2H), 1.77 – 1.72 (m, 2H).

**<sup>13</sup>C NMR** (CDCl<sub>3</sub>, 151 MHz): δ 186.0, 163.3, 161.9, 161.2, 154.4, 143.3, 134.9, 129.5, 127.0, 124.4, 122.0, 114.3, 113.4, 102.9, 90.6, 55.5, 55.4, 29.9, 24.1, 22.2, 21.6.

**HRMS** (ESI) *m/z*: [M+H]<sup>+</sup> calcd for C<sub>25</sub>H<sub>25</sub>O<sub>4</sub><sup>+</sup>, 389.1747; found 389.1733.

**IR** (neat) *v* (cm<sup>-1</sup>): 2987, 2900, 1642, 1596, 1575, 1502, 1409, 1256.

**(Z)-1-(3,4-dimethoxyphenyl)-2-(3-(3,4-dimethoxyphenyl)-5,6,7,8-tetrahydro-1H-isochromen-1-ylidene)ethan-1-one (4e)**

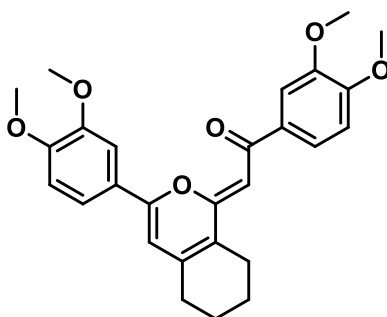

197 mg (88% yield) orange solid, purified by flash column chromatography (SiO<sub>2</sub>, Ethyl acetate: n-hexane, 1:4). R<sub>f</sub> = 0.20.

**m.p.** = 165.1-166.0 °C

**<sup>1</sup>H NMR** (CDCl<sub>3</sub>, 600 MHz): δ 7.88 (d, *J* = 2.1 Hz, 1H), 7.74 (dd, *J* = 8.4, 2.1 Hz, 1H), 7.59 (d, *J* = 2.0 Hz, 1H), 7.53 (dd, *J* = 8.3, 2.0 Hz, 1H), 6.96 (d, *J* = 8.5 Hz, 1H), 6.86 (d, *J* = 8.3 Hz, 1H), 6.29 (s, 1H), 6.00 (s, 1H), 2.48 (t, *J* = 6.2 Hz, 2H), 2.35 (t, *J* = 6.3 Hz, 2H), 1.86 – 1.74 (m, 4H);

**<sup>13</sup>C NMR** (CDCl<sub>3</sub>, 151 MHz): δ 185.8, 163.1, 154.2, 151.4, 150.8, 149.3, 148.9, 143.3, 135.3, 124.7, 122.1, 120.9, 118.5, 111.2, 110.6, 110.0, 108.5, 103.0, 90.6, 56.3, 56.1, 56.0, 29.9, 24.1, 22.2, 21.7.

**HRMS** (ESI) *m/z*: [M+Na]<sup>+</sup> calcd for C<sub>27</sub>H<sub>28</sub>O<sub>6</sub>Na<sup>+</sup>, 471.1778; found 471.1771.

**IR** (neat) *v* (cm<sup>-1</sup>): 2987, 2894, 1644, 1592, 1575, 1275, 1259, 1063.

**(Z)-1-(5-fluoro-2-methoxyphenyl)-2-(3-(5-fluoro-2-methoxyphenyl)-5,6,7,8-tetrahydro-1H-isochromen-1-ylidene)ethan-1-one (4f)**

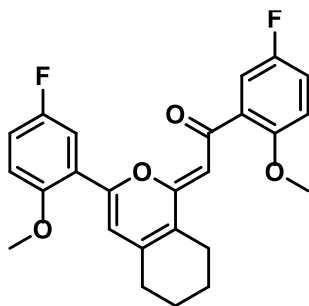

161 mg (76% yield) orange solid, purified by flash column chromatography (SiO<sub>2</sub>, Ethyl acetate: n-hexane, 1:10). R<sub>f</sub> = 0.25.

**m.p.** = 151.2-152.7 °C

**<sup>1</sup>H NMR** (CDCl<sub>3</sub>, 600 MHz): δ 8.42 (d, *J* = 10.0 Hz, 1H), 7.36 (dd, *J* = 8.8, 3.3 Hz, 1H), 7.05 – 6.99 (m, 3H), 6.87 (ddd, *J* = 11.2, 9.0, 4.2 Hz, 2H), 5.94 (s, 1H), 3.91 (s, 3H), 3.84 (s, 3H), 2.50 (t, *J* = 6.1 Hz, 2H), 2.31 (t, *J* = 6.2 Hz, 2H), 1.82 – 1.74 (m, 4H).

**<sup>13</sup>C NMR** (CDCl<sub>3</sub>, 151 MHz): δ 186.1, 162.7, 157.5 (d, *J*<sub>FC</sub> = 238.6 Hz), 157.2 (d, *J*<sub>FC</sub> = 240.1 Hz), 153.5, 153.2, 150.4, 144.0, 134.4, 123.6, 121.4 (d, *J*<sub>FC</sub> = 8.2 Hz), 117.1 (d, *J*<sub>FC</sub> = 21.1 Hz), 116.9 (d, *J*<sub>FC</sub> = 21.1 Hz), 116.4 (d, *J*<sub>FC</sub> = 23.9 Hz), 115.8 (d, *J*<sub>FC</sub> = 26.4 Hz), 113.1 (d, *J*<sub>FC</sub> = 7.6 Hz), 112.1 (d, *J*<sub>FC</sub> = 8.1 Hz), 110.8, 95.6, 56.7, 56.1, 30.2, 24.1, 22.2, 21.7.

**<sup>19</sup>F NMR** (CDCl<sub>3</sub>, 565 MHz): δ -120.77, -123.65.

**HRMS** (ESI) *m/z*: [M+Na]<sup>+</sup> calcd for C<sub>25</sub>H<sub>22</sub>F<sub>2</sub>O<sub>4</sub>Na<sup>+</sup>, 447.1378; found 447.1373.

**IR** (neat) *v* (cm<sup>-1</sup>): 3067, 2933, 1638, 1612, 1573, 1479, 1252, 1156, 1022.

**(Z)-1-([1,1'-biphenyl]-4-yl)-2-(3-([1,1'-biphenyl]-4-yl)-5,6,7,8-tetrahydro-1H-isochromen-1-ylidene)ethan-1-one (4g)**

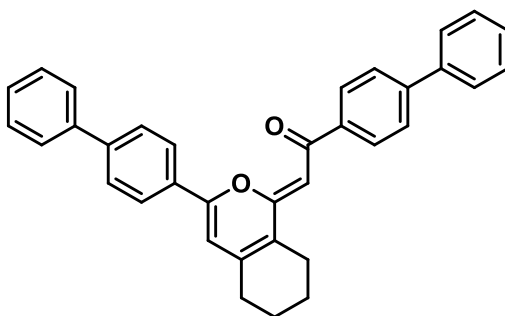

173 mg (72% yield) yellow solid, purified by flash column chromatography (SiO<sub>2</sub>, Ethyl acetate: n-hexane, 1:10). R<sub>f</sub> = 0.35.

**m.p.** = 169.4-170.3 °C

**<sup>1</sup>H NMR** (CDCl<sub>3</sub>, 600 MHz): δ 8.24 – 8.16 (m, 2H), 8.08 – 8.02 (m, 2H), 7.73 – 7.62 (m, 8H), 7.46 (t, *J* = 7.7 Hz, 4H), 7.38 (td, *J* = 7.2, 1.4 Hz, 2H), 6.49 (s, 1H), 6.10 (s, 1H), 2.53 (t, *J* = 6.4 Hz, 2H), 2.42 (t, *J* = 6.3 Hz, 2H), 1.87 (m, 2H), 1.82 – 1.76 (m, 2H).

**<sup>13</sup>C NMR** (CDCl<sub>3</sub>, 101 MHz): δ 186.8, 163.4, 154.1, 143.5, 143.4, 142.7, 140.9, 140.6, 140.4, 130.5, 129.0, 128.9, 128.1, 127.8, 127.6, 127.3, 127.1, 127.0, 125.7, 123.2, 104.5, 91.4, 29.9, 24.2, 22.2, 21.6.

**HRMS** (ESI) *m/z*: [M+H]<sup>+</sup> calcd for C<sub>35</sub>H<sub>29</sub>O<sub>2</sub><sup>+</sup>, 481.2162; found 481.2160.

**IR** (neat) *v* (cm<sup>-1</sup>): 3060, 2926, 2851, 1645, 1617, 1601, 1567, 1482, 1212.

**(Z)-1-(o-tolyl)-2-(3-(o-tolyl)-5,6,7,8-tetrahydro-1H-isochromen-1-ylidene)ethan-1-one (4h)**

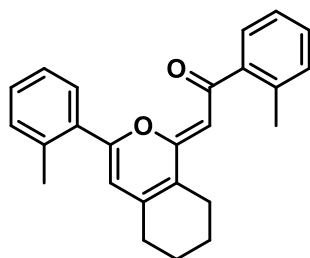

119 mg (67% yield) yellow solid, purified by flash column chromatography (SiO<sub>2</sub>, Ethyl acetate: n-hexane, 1:10). R<sub>f</sub> = 0.35.

**m.p.** = 163.0-163.6 °C

**<sup>1</sup>H NMR** (CD<sub>2</sub>Cl<sub>2</sub>, 600 MHz): δ 7.51 (d, *J* = 7.7 Hz, 1H), 7.39 (d, *J* = 7.4 Hz, 1H), 7.33 (t, *J* = 6.8 Hz, 1H), 7.28 – 7.12 (m, 5H), 6.07 (s, 1H), 5.62 (s, 1H), 2.50 – 2.47 (m, 5H), 2.39 (s, 3H), 2.28 (t, *J* = 6.2 Hz, 2H), 1.78 (m, 4H).

**<sup>13</sup>C NMR** (CD<sub>2</sub>Cl<sub>2</sub>, 151 MHz): δ 191.44, 163.09, 156.08, 144.29, 143.53, 137.48, 135.62, 132.70, 131.45, 131.03, 130.02, 129.23, 129.02, 127.18, 126.27, 125.67, 123.02, 109.59, 95.60, 30.13, 24.46, 22.50, 21.87, 21.21, 20.11.

**HRMS** (ESI) *m/z*: [M+Na]<sup>+</sup> calcd for C<sub>25</sub>H<sub>24</sub>O<sub>2</sub>Na<sup>+</sup>, 379.1668; found 379.1662.

**IR** (neat) *v* (cm<sup>-1</sup>): 3046, 2927, 1637, 1614, 1562, 1475, 1459, 1235, 1213, 1039, 986.

**(Z)-1-(p-tolyl)-2-(3-(p-tolyl)-5,6,7,8-tetrahydro-1H-isochromen-1-ylidene)ethan-1-one (4i)**

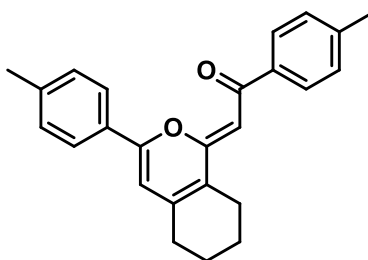

123 mg (69% yield) yellow solid, purified by flash column chromatography (SiO<sub>2</sub>, Ethyl acetate: n-hexane, 1:10). R<sub>f</sub> = 0.3.

**m.p.** = 188.6-190.4 °C

**<sup>1</sup>H NMR** (CDCl<sub>3</sub>, 600 MHz): δ 8.03 (d, *J* = 8.0 Hz, 2H), 7.86 (d, *J* = 7.8 Hz, 2H), 7.27 (d, *J* = 8.0 Hz, 2H), 7.23 (d, *J* = 7.8 Hz, 2H), 6.36 (s, 1H), 6.00 (s, 1H), 2.48 (t, *J* = 6.2 Hz, 2H), 2.39 (d, *J* = 4.6 Hz, 6H), 2.35 (t, *J* = 6.4 Hz, 2H), 1.83 (m, 2H), 1.76 (m, 2H).

**<sup>13</sup>C NMR** (CDCl<sub>3</sub>, 151 MHz): δ 187.0, 163.4, 154.6, 143.3, 141.1, 140.4, 139.5, 129.7, 129.0, 128.9, 127.7, 125.3, 122.7, 103.7, 91.2, 29.9, 24.1, 22.2, 21.6, 21.6.

**HRMS** (ESI) *m/z*: [M+H]<sup>+</sup> calcd for C<sub>25</sub>H<sub>25</sub>O<sub>2</sub><sup>+</sup>, 357.1849; found 357.1842.

**IR** (neat) *v* (cm<sup>-1</sup>): 3053, 2933, 2867, 1645, 1621, 1605, 1569, 1495, 1169.

**(Z)-1-(4-(trifluoromethoxy)phenyl)-2-(3-(4-(trifluoromethoxy)phenyl)-5,6,7,8-tetrahydro-1H-isochromen-1-ylidene)ethan-1-one (4j)**

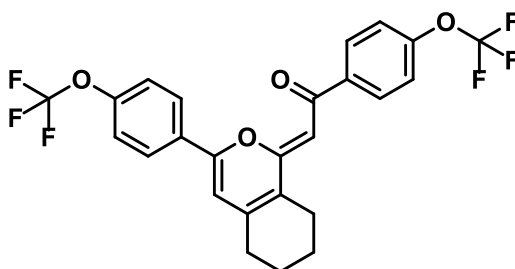

206 mg (83% yield) yellow solid, purified by flash column chromatography (SiO<sub>2</sub>, Ethyl acetate: n-hexane, 1:10). R<sub>f</sub> = 0.30.

**m.p.** = 129.1-129.8 °C

**<sup>1</sup>H NMR** (CDCl<sub>3</sub>, 600 MHz): δ 8.22 – 8.17 (m, 2H), 8.00 – 7.96 (m, 2H), 7.29 (dd, *J* = 39.5, 8.4 Hz, 4H), 6.42 (s, 1H), 5.99 (s, 1H), 2.51 (t, *J* = 6.3 Hz, 2H), 2.36 (t, *J* = 6.3 Hz, 2H), 1.87 – 1.76 (m, 4H).



<sup>13</sup>C NMR (CDCl<sub>3</sub>, 151 MHz): δ 185.5, 163.7, 153.1, 151.2, 150.6, 143.8, 140.3, 130.2, 129.4, 127.0, 123.7, 121.3, 120.6 (q,  $J_{FC} = 258.2$  Hz), 120.4, 105.1, 91.1, 30.0, 24.1, 22.1, 21.5.

(the two -OCF<sub>3</sub> are very similar.  $\Delta\delta < \pm 0.02$ ppm)

<sup>19</sup>F NMR (CDCl<sub>3</sub>, 565 MHz): δ -57.54, -57.62.

HRMS (ESI) m/z: [M+Na]<sup>+</sup> calcd for C<sub>25</sub>H<sub>18</sub>F<sub>6</sub>O<sub>4</sub>Na<sup>+</sup>, 519.1001; found 519.0997.

IR (neat)  $\nu$  (cm<sup>-1</sup>): 3046, 2940, 1651, 1623, 1514, 1490, 1252, 1202, 1153, 986.

**(Z)-1-(3-fluorophenyl)-2-(3-(3-fluorophenyl)-5,6,7,8-tetrahydro-1H-isochromen-1-ylidene)ethan-1-one 4k**

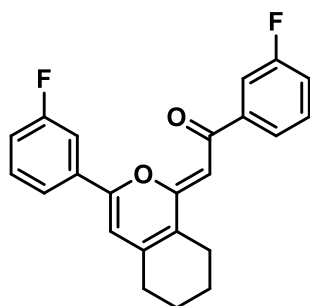

147 mg (81% yield) orange solid, purified by flash column chromatography (SiO<sub>2</sub>, Ethyl acetate: n-hexane, 1:10). R<sub>f</sub> = 0.30.

m.p. = 185.6-186.5 °C

<sup>1</sup>H NMR (CDCl<sub>3</sub>, 600 MHz): δ 8.02 – 7.96 (m, 1H), 7.80 (dt,  $J = 10.0, 2.1$  Hz, 1H), 7.71 (dt,  $J = 7.7, 1.4$  Hz, 1H), 7.64 (dt,  $J = 9.9, 2.0$  Hz, 1H), 7.46 (td,  $J = 8.0, 5.8$  Hz, 1H), 7.39 (td,  $J = 7.9, 5.5$  Hz, 1H), 7.13 (m, 2H), 6.42 (s, 1H), 5.98 (s, 1H), 2.51 (t,  $J = 6.0$  Hz, 2H), 2.36 (t,  $J = 6.3$  Hz, 2H), 1.88 – 1.75 (m, 4H).

<sup>13</sup>C NMR (CDCl<sub>3</sub>, 151 MHz): δ 185.5, 163.6, 163.2 (d,  $J_{FC} = 246.1$  Hz), 163.0 (d,  $J_{FC} = 246.1$  Hz), 153.1, 144.2 (d,  $J_{FC} = 6.0$  Hz), 143.7, 133.7 (d,  $J_{FC} = 7.9$  Hz), 130.7 (d,  $J_{FC} = 8.2$  Hz), 129.9 (d,  $J_{FC} = 7.7$  Hz), 124.0, 123.2 (d,  $J_{FC} = 2.8$  Hz), 121.1 (d,  $J_{FC} = 2.8$  Hz), 117.8 (d,  $J_{FC} = 21.3$  Hz), 117.2 (d,  $J_{FC} = 21.4$  Hz), 114.5 (d,  $J_{FC} = 22.0$  Hz), 112.1 (d,  $J_{FC} = 24.0$  Hz), 105.4, 91.2, 29.9, 24.1, 22.1, 21.5.

<sup>19</sup>F NMR (CDCl<sub>3</sub>, 565 MHz): δ -111.69, -113.03.

HRMS (ESI) m/z: [M+Na]<sup>+</sup> calcd for C<sub>23</sub>H<sub>18</sub>F<sub>2</sub>O<sub>2</sub>Na<sup>+</sup>, 387.1167; found 387.1158.

IR (neat)  $\nu$  (cm<sup>-1</sup>): 3060, 2933, 1645, 1624, 1566, 1505, 1470, 1263, 1004.

**(Z)-1-(4-fluorophenyl)-2-(3-(4-fluorophenyl)-5,6,7,8-tetrahydro-1H-isochromen-1-ylidene)ethan-1-one (4l)**

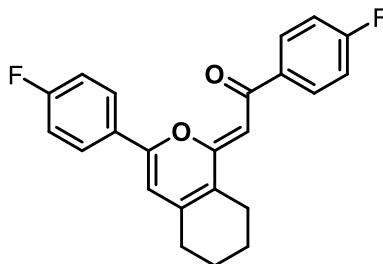

151 mg (83% yield) orange solid, purified by flash column chromatography (SiO<sub>2</sub>, Ethyl acetate: n-hexane, 1:10). R<sub>f</sub> = 0.35.

**m.p.** = 196.3-197.9 °C

**<sup>1</sup>H NMR** (CDCl<sub>3</sub>, 600 MHz): δ 8.19 – 8.13 (m, 2H), 7.98 – 7.93 (m, 2H), 7.17 (t, *J* = 8.6 Hz, 2H), 7.10 (t, *J* = 8.6 Hz, 2H), 6.37 (s, 1H), 5.98 (s, 1H), 2.50 (t, *J* = 6.2 Hz, 2H), 2.36 (t, *J* = 6.3 Hz, 2H), 1.87 – 1.75 (m, 4H).

**<sup>13</sup>C NMR** (CDCl<sub>3</sub>, 151 MHz): δ 185.7, 164.6 (d, *J*<sub>FC</sub> = 250.7 Hz), 164.1 (d, *J*<sub>FC</sub> = 252.2 Hz), 163.6, 153.6, 143.8, 138.2, 129.9 (d, *J*<sub>FC</sub> = 9.0 Hz), 127.8 (d, *J*<sub>FC</sub> = 3.1 Hz), 127.5 (d, *J*<sub>FC</sub> = 8.4 Hz), 123.1, 116.2 (d, *J*<sub>FC</sub> = 22.0 Hz), 115.3 (d, *J*<sub>FC</sub> = 21.5 Hz), 104.3, 90.9, 30.0, 24.1, 22.1, 21.6.

**<sup>19</sup>F NMR** (CDCl<sub>3</sub>, 565 MHz): δ -109.51, -109.79.

**HRMS** (ESI) *m/z*: [M+Na]<sup>+</sup> calcd for C<sub>23</sub>H<sub>18</sub>F<sub>2</sub>O<sub>2</sub>Na<sup>+</sup>, 387.1167; found 387.1158.

**IR** (neat) *v* (cm<sup>-1</sup>): 3033, 2927, 1647, 1620, 1587, 1568, 1485, 1210, 1145.

**(Z)-1-(2-chlorophenyl)-2-(3-(2-chlorophenyl)-5,6,7,8-tetrahydro-1H-isochromen-1-ylidene)ethan-1-one (4m)**

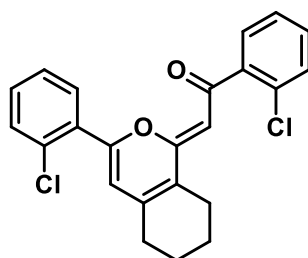

145 mg (73% yield) yellow solid, purified by flash column chromatography (SiO<sub>2</sub>, Ethyl acetate: n-hexane, 1:10). R<sub>f</sub> = 0.30.

**m.p.** = 149.2-150.5 °C

**<sup>1</sup>H NMR** (CDCl<sub>3</sub>, 600 MHz): δ 8.04 (d, *J* = 7.8 Hz, 1H), 7.45 (dt, *J* = 7.5, 1.4 Hz, 1H), 7.40 (dd, *J* = 8.0, 1.3 Hz, 1H), 7.38 – 7.33 (m, 1H), 7.32 – 7.26 (m, 2H), 7.24 – 7.16 (m, 2H), 6.70 (s, 1H), 5.70 (s, 1H), 2.50 (t, *J* = 6.0 Hz, 2H), 2.31 (t, *J* = 6.3 Hz, 2H), 1.85 – 1.74 (m, 4H).;

**<sup>13</sup>C NMR** (CDCl<sub>3</sub>, 151 MHz): δ 188.7, 163.3, 151.5, 143.4, 143.2, 131.5, 130.7, 130.6, 130.5, 130.4, 129.9, 129.8, 128.8, 127.6, 126.7, 123.8, 110.8, 96.2, 30.1, 24.1, 22.1, 21.5.

**HRMS** (ESI) *m/z*: [M+Na]<sup>+</sup> calcd for C<sub>23</sub>H<sub>18</sub>Cl<sub>2</sub>O<sub>2</sub>Na<sup>+</sup>, 419.0576; found 419.0570.

**IR** (neat) *v* (cm<sup>-1</sup>): 3060, 2933, 1639, 1616, 1564, 1486, 1460, 1210, 985.

**(Z)-1-(3-chlorophenyl)-2-(3-(3-chlorophenyl)-5,6,7,8-tetrahydro-1H-isochromen-1-ylidene)ethan-1-one (4n)**

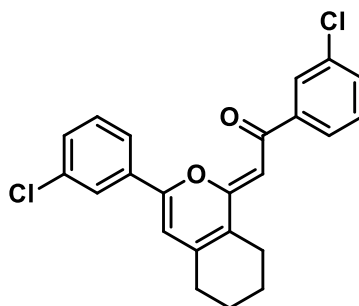

151 mg (76% yield) orange solid, purified by flash column chromatography (SiO<sub>2</sub>, Ethyl acetate: n-hexane, 1:10). R<sub>f</sub> = 0.30.

**m.p.** = 185.1-186.0 °C

**<sup>1</sup>H NMR** (CDCl<sub>3</sub>, 600 MHz): δ 8.20 (dt, *J* = 7.9, 1.4 Hz, 1H), 7.96 (t, *J* = 1.9 Hz, 1H), 7.91 (t, *J* = 1.9 Hz, 1H), 7.81 (dt, *J* = 7.7, 1.4 Hz, 1H), 7.48 – 7.41 (m, 2H), 7.40 – 7.34 (m, 2H), 6.43 (s, 1H), 5.97 (s, 1H), 2.51 (t, *J* = 5.9 Hz, 2H), 2.37 (t, *J* = 6.1 Hz, 2H), 1.85 (m, 2H), 1.80 – 1.75 (m, 2H).

**<sup>13</sup>C NMR** (CDCl<sub>3</sub>, 151 MHz): δ 185.5, 163.5, 152.8, 143.6, 143.6, 134.8, 134.5, 133.3, 130.8, 130.6, 130.2, 129.6, 127.7, 125.7, 124.9, 124.1, 123.7, 105.4, 91.2, 29.9, 24.1, 22.0, 21.5.

**HRMS** (ESI) *m/z*: [M+Na]<sup>+</sup> calcd for C<sub>23</sub>H<sub>18</sub>Cl<sub>2</sub>O<sub>2</sub>Na<sup>+</sup>, 419.0576; found 419.0569.

**IR** (neat) *v* (cm<sup>-1</sup>): 3053, 2933, 1643, 1619, 1566, 1502, 1468, 1252, 998.

**(Z)-1-(4-chlorophenyl)-2-(3-(4-chlorophenyl)-5,6,7,8-tetrahydro-1H-isochromen-1-ylidene)ethan-1-one (4o)**

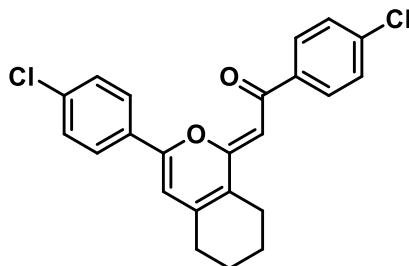

157 mg (79% yield) orange solid, purified by flash column chromatography (SiO<sub>2</sub>, Ethyl acetate: n-hexane, 1:10). R<sub>f</sub> = 0.30.

**m.p.** = 194.6-196.1 °C

**<sup>1</sup>H NMR** (CDCl<sub>3</sub>, 600 MHz): δ 8.10 – 8.07 (m, 2H), 7.89 – 7.86 (m, 2H), 7.46 – 7.43 (m, 2H), 7.41 – 7.38 (m, 2H), 6.41 (s, 1H), 5.98 (s, 1H), 2.51 (t, *J* = 6.1 Hz, 2H), 2.36 (t, *J* = 6.2 Hz, 2H), 1.88 – 1.82 (m, 2H), 1.80 – 1.75 (m, 2H).

**<sup>13</sup>C NMR** (CDCl<sub>3</sub>, 151 MHz): δ 185.8, 163.6, 153.3, 143.7, 140.3, 137.1, 136.3, 130.0, 129.3, 129.0, 128.6, 126.6, 123.6, 104.8, 91.1, 29.9, 24.1, 22.1, 21.5.

**HRMS** (ESI) *m/z*: [M+H]<sup>+</sup> calcd for C<sub>23</sub>H<sub>18</sub>Cl<sub>2</sub>O<sub>2</sub><sup>+</sup>, 397.0756; found 397.0753.

**IR** (neat) *v* (cm<sup>-1</sup>): 3062, 2934, 2852, 1646, 1619, 1585, 1565, 1505, 1478, 1077.

**(Z)-1-(2,4-dichlorophenyl)-2-(3-(2,4-dichlorophenyl)-5,6,7,8-tetrahydro-1H-isochromen-1-ylidene)ethan-1-one (4p)**

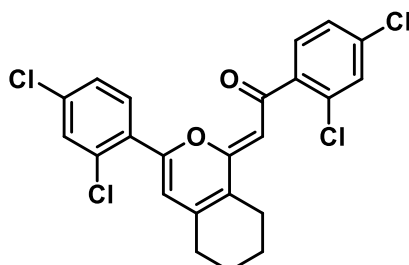

174 mg (75% yield) yellow sticky liquid, purified by flash column chromatography (SiO<sub>2</sub>, Ethyl acetate: n-hexane, 1:10). R<sub>f</sub> = 0.30.

**<sup>1</sup>H NMR** (CDCl<sub>3</sub>, 600 MHz): δ 7.92 (d, *J* = 8.5 Hz, 1H), 7.43 (d, *J* = 2.1 Hz, 1H), 7.38 – 7.33 (m, 2H), 7.26 (d, *J* = 2.0 Hz, 1H), 7.20 (dd, *J* = 8.2, 2.0 Hz, 1H), 6.65 (s, 1H), 5.66 (s, 1H), 2.49 (t, *J* = 6.2 Hz, 2H), 2.30 (t, *J* = 6.3 Hz, 2H), 1.84 – 1.74 (m, 4H).

**<sup>13</sup>C NMR** (CDCl<sub>3</sub>, 151 MHz): δ 187.6, 163.3, 150.7, 143.5, 141.6, 136.2, 135.1, 132.2, 131.4, 131.2, 130.6, 129.8, 129.6, 128.8, 127.9, 127.1, 124.1, 111.0, 96.3, 30.1, 24.0, 22.0, 21.4.

**HRMS** (ESI) *m/z*: [M+H]<sup>+</sup> calcd for C<sub>23</sub>H<sub>16</sub>Cl<sub>4</sub>O<sub>2</sub><sup>+</sup>, 464.9973; found 464.9977.

**IR** (neat) *v* (cm<sup>-1</sup>): 3053, 2927, 1644, 1621, 1581, 1494, 1265, 1099, 1036.

**(Z)-1-(3-bromophenyl)-2-(3-(3-bromophenyl)-5,6,7,8-tetrahydro-1H-isochromen-1-ylidene)ethan-1-one (4q)**

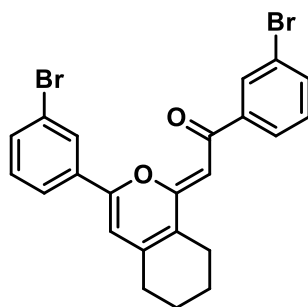

175 mg (72% yield) orange solid, purified by flash column chromatography (SiO<sub>2</sub>, Ethyl acetate: n-hexane, 1:10). R<sub>f</sub> = 0.30.

**m.p.** = 168.5-169.1 °C

**<sup>1</sup>H NMR** (CDCl<sub>3</sub>, 600 MHz): 8.28 (dt, *J* = 7.9, 1.3 Hz, 1H), 8.08 (dt, *J* = 15.5, 1.8 Hz, 2H), 7.86 (dt, *J* = 7.7, 1.3 Hz, 1H), 7.56 (m, 2H), 7.40 (t, *J* = 7.9 Hz, 1H), 7.30 (t, *J* = 7.8 Hz, 1H), 6.43 (s, 1H), 5.96 (s, 1H), 2.51 (t, *J* = 6.0 Hz, 2H), 2.37 (t, *J* = 6.2 Hz, 2H), 1.88 – 1.75 (m, 4H).

**<sup>13</sup>C NMR** (CDCl<sub>3</sub>, 151 MHz): δ 185.4, 163.5, 152.7, 143.8, 143.6, 133.8, 133.5, 133.2, 130.9, 130.6, 130.0, 127.7, 126.2, 124.3, 124.1, 122.9, 122.7, 105.4, 91.2, 29.9, 24.2, 22.1, 21.5.

**HRMS** (ESI) *m/z*: [M+Na]<sup>+</sup> calcd for C<sub>23</sub>H<sub>18</sub>Br<sub>2</sub>O<sub>2</sub>Na<sup>+</sup>, 506.9565; found 506.9565.

**IR** (neat) *v* (cm<sup>-1</sup>): 3060, 2940, 1640, 1613, 1557, 1488, 1467, 1455, 992.

**(Z)-1-(4-bromophenyl)-2-(3-(4-bromophenyl)-5,6,7,8-tetrahydro-1H-isochromen-1-ylidene)ethan-1-one (4r)**

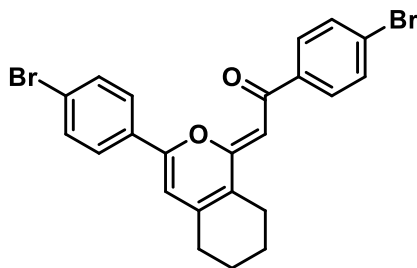

179 mg (74% yield) orange solid, purified by flash column chromatography (SiO<sub>2</sub>, Ethyl acetate: n-hexane, 1:10). R<sub>f</sub> = 0.35.

**m.p.** = 167.1-168.8 °C

**<sup>1</sup>H NMR** (CDCl<sub>3</sub>, 600 MHz): δ 8.03 – 7.99 (m, 2H), 7.82 – 7.78 (m, 2H), 7.62 – 7.58 (m, 2H), 7.57 – 7.54 (m, 2H), 6.43 (s, 1H), 5.97 (s, 1H), 2.50 (t, *J* = 6.0 Hz, 2H), 2.35 (t, *J* = 6.0 Hz, 2H), 1.87 – 1.74 (m, 4H).

**<sup>13</sup>C NMR** (CDCl<sub>3</sub>, 151 MHz): δ 185.9, 163.6, 153.4, 143.7, 140.7, 132.2, 131.5, 130.4, 129.2, 126.8, 125.6, 124.7, 123.7, 104.9, 91.0, 29.9, 24.1, 22.1, 21.5.

**HRMS** (ESI) *m/z*: [M+H]<sup>+</sup> calcd for C<sub>23</sub>H<sub>19</sub>O<sub>2</sub>Br<sub>2</sub><sup>+</sup>, 484.9746; found 484.9744.

**IR** (neat) *v* (cm<sup>-1</sup>): 3060, 2927, 2860, 1643, 1618, 1565, 1505, 1476, 1209.

**(Z)-1-(4-iodophenyl)-2-(3-(4-iodophenyl)-5,6,7,8-tetrahydro-1H-isochromen-1-ylidene)ethan-1-one (4s)**

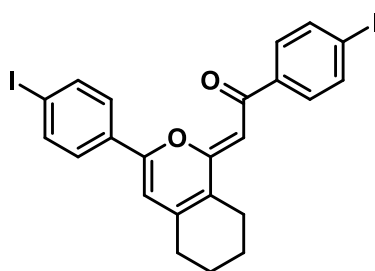

201 mg (69 % yield) orange solid, purified by flash column chromatography (SiO<sub>2</sub>, Ethyl acetate: n-hexane, 1:10). R<sub>f</sub> = 0.30.

**m.p.** = 194.2-195.5 °C

**<sup>1</sup>H NMR** (CDCl<sub>3</sub>, 600 MHz): δ 7.87 – 7.75 (m, 6H), 7.66 (d, *J* = 8.1 Hz, 2H), 6.43 (s, 1H), 5.96 (s, 1H), 2.50 (t, *J* = 6.1 Hz, 2H), 2.35 (t, *J* = 6.2 Hz, 2H), 1.81 (m, 4H).

<sup>13</sup>C NMR (CDCl<sub>3</sub>, 151 MHz): δ 186.2, 163.5, 153.5, 143.6, 141.3, 138.2, 137.5, 131.0, 129.2, 126.8, 123.8, 104.9, 98.0, 96.7, 91.1, 29.9, 24.2, 22.1, 21.6.

HRMS (ESI) m/z: [M+H]<sup>+</sup> calcd for C<sub>23</sub>H<sub>19</sub>O<sub>2</sub>I<sub>2</sub><sup>+</sup>, 580.9468; found 580.9458.

IR (neat) ν (cm<sup>-1</sup>): 3053, 2933, 1642, 1609, 1568, 1502, 1474, 1210, 992.

**methyl (Z)-4-(1-(2-(4-(methoxycarbonyl)phenyl)-2-oxoethylidene)-5,6,7,8-tetrahydro-1H-isochromen-3-yl)benzoate (4t)**

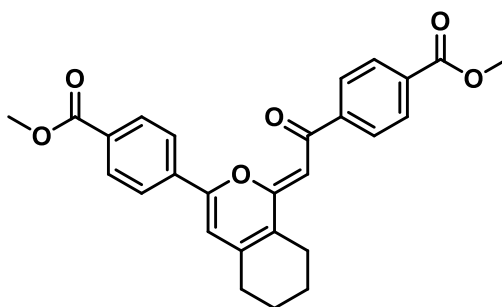

144 mg (65% yield) red sticky liquid, purified by flash column chromatography (SiO<sub>2</sub>, Ethyl acetate: n-hexane, 1:4). R<sub>f</sub> = 0.25.

<sup>1</sup>H NMR (CDCl<sub>3</sub>, 600 MHz): δ 8.25 – 8.20 (m, 2H), 8.16 – 8.12 (m, 2H), 8.12 – 8.08 (m, 2H), 8.02 – 7.96 (m, 2H), 6.56 (s, 1H), 6.06 (s, 1H), 3.94 (d, J = 1.9 Hz, 6H), 2.54 (t, J = 6.1 Hz, 2H), 2.40 (t, J = 6.2 Hz, 2H), 1.90 – 1.83 (m, 2H), 1.83 – 1.76 (m, 2H).

<sup>13</sup>C NMR (CDCl<sub>3</sub>, 151 MHz): δ 186.3, 166.8, 166.7, 163.6, 153.2, 145.7, 143.7, 135.4, 132.0, 131.4, 130.3, 129.7, 127.5, 125.1, 124.6, 106.4, 91.7, 52.5, 52.41, 29.9, 24.2, 22.1, 21.5.

HRMS (ESI) m/z: [M+Na]<sup>+</sup> calcd for C<sub>27</sub>H<sub>24</sub>O<sub>6</sub>Na<sup>+</sup>, 467.1465; found 467.1460.

IR (neat) ν (cm<sup>-1</sup>): 3060, 2947, 1715, 1644, 1608, 1563, 1488, 1433, 1271, 1102.

**(Z)-1-(4-(trifluoromethyl)phenyl)-2-(3-(4-(trifluoromethyl)phenyl)-5,6,7,8-tetrahydro-1H-isochromen-1-ylidene)ethan-1-one (4u)**

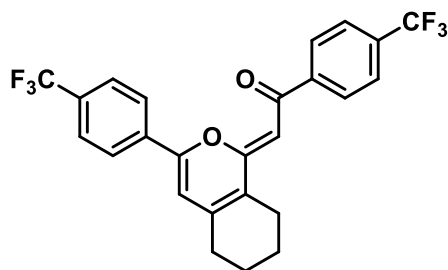

183 mg (79% yield) yellow solid, purified by flash column chromatography (SiO<sub>2</sub>, Ethyl acetate: n-hexane, 1:15). R<sub>f</sub> = 0.35.

**m.p.** = 169.4-170.7 °C

**<sup>1</sup>H NMR** (CDCl<sub>3</sub>, 600 MHz): δ 8.26 (d, *J* = 8.2 Hz, 2H), 8.03 (d, *J* = 8.0 Hz, 2H), 7.71 (dd, *J* = 26.7, 8.1 Hz, 4H), 6.53 (s, 1H), 6.04 (s, 1H), 2.54 (t, *J* = 6.0 Hz, 2H), 2.39 (t, *J* = 6.3 Hz, 2H), 1.91 – 1.76 (m, 4H).

**<sup>13</sup>C NMR** (CDCl<sub>3</sub>, 151 MHz): δ 185.9, 163.7, 152.8, 144.9, 143.8, 134.8, 132.5 (q, *J*<sub>FC</sub> = 31.7 Hz), 131.8 (q, *J*<sub>FC</sub> = 31.7 Hz), 127.9, 126.0 (q, *J*<sub>FC</sub> = 3.9 Hz), 125.5, 125.5 (q, *J*<sub>FC</sub> = 3.7 Hz), 124.6, 124.1 (q, *J*<sub>FC</sub> = 273.3 Hz), 124.0 (q, *J*<sub>FC</sub> = 271.8 Hz), 106.2, 91.6, 30.0, 24.2, 22.0, 21.5.

**<sup>19</sup>F NMR** (CDCl<sub>3</sub>, 565 MHz): δ -62.60, -62.73.

**HRMS** (ESI) *m/z*: [M+Na]<sup>+</sup> calcd for C<sub>25</sub>H<sub>18</sub>F<sub>6</sub>O<sub>2</sub>Na<sup>+</sup>, 487.1103; found 487.1094.

**IR** (neat) *v* (cm<sup>-1</sup>): 3013, 2940, 1644, 1621, 1566, 1486, 1317, 1114, 1066.

**(Z)-1-(naphthalen-2-yl)-2-(3-(naphthalen-2-yl)-5,6,7,8-tetrahydro-1H-isochromen-1-ylidene)ethan-1-one (4v)**

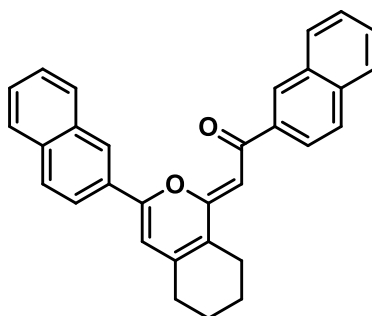

175 mg (82% yield) red solid, purified by flash column chromatography (SiO<sub>2</sub>, Ethyl acetate: n-hexane, 1:10). R<sub>f</sub> = 0.35.

**m.p.** = 182.6-183.7 °C



**<sup>1</sup>H NMR** (CDCl<sub>3</sub>, 600 MHz): δ 8.73 (s, 1H), 8.48 (s, 1H), 8.11 (ddd, *J* = 12.2, 8.6, 1.8 Hz, 2H), 7.99 (td, *J* = 7.4, 3.5 Hz, 2H), 7.92 – 7.82 (m, 4H), 7.57 – 7.48 (m, 4H), 6.52 (s, 1H), 6.18 (s, 1H), 2.50 (t, *J* = 6.2 Hz, 2H), 2.40 (t, *J* = 6.4 Hz, 2H), 1.87 – 1.75 (m, 4H).

**<sup>13</sup>C NMR** (CDCl<sub>3</sub>, 151 MHz): δ 187.2, 163.4, 154.3, 143.4, 139.5, 134.8, 134.2, 133.4, 133.0, 129.5, 129.4, 128.8, 128.6, 128.1, 127.8, 127.8, 127.7, 127.3, 127.2, 126.6, 126.4, 125.6, 124.9, 123.4, 122.2, 105.1, 91.8, 29.9, 24.2, 22.2, 21.6.

**HRMS** (ESI) *m/z*: [M+Na]<sup>+</sup> calcd for C<sub>23</sub>H<sub>21</sub>O<sub>3</sub>Na<sup>+</sup>, 451.1668; found 451.1664.

**IR** (neat) *v* (cm<sup>-1</sup>): 3053, 2933, 1648, 1614, 1572, 1512, 1273, 1123, 991.

**(Z)-1-(thiophen-2-yl)-2-(3-(thiophen-2-yl)-5,6,7,8-tetrahydro-1H-isochromen-1-ylidene)ethan-1-one (4w)**

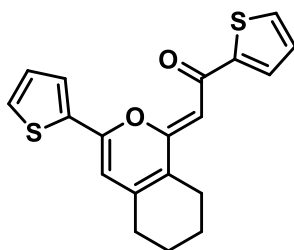

155 mg (91% yield) red solid, purified by flash column chromatography (SiO<sub>2</sub>, Ethyl acetate: n-hexane, 1:10). *R*<sub>f</sub> = 0.30.

**m.p.** = 194.4-195.6 °C

**<sup>1</sup>H NMR** (CDCl<sub>3</sub>, 600 MHz): δ 8.02 (dd, *J* = 3.7, 1.3 Hz, 1H), 7.64 (dd, *J* = 3.7, 1.2 Hz, 1H), 7.48 (dd, *J* = 4.9, 1.2 Hz, 1H), 7.36 (dd, *J* = 5.0, 1.3 Hz, 1H), 7.10 (ddd, *J* = 19.3, 5.0, 3.7 Hz, 2H), 6.17 (s, 1H), 5.95 (s, 1H), 2.46 (t, *J* = 6.3 Hz, 2H), 2.34 (t, *J* = 6.3 Hz, 2H), 1.86 – 1.72 (m, 4H).

**<sup>13</sup>C NMR** (CDCl<sub>3</sub>, 151 MHz): δ 179.0, 162.8, 150.4, 149.2, 143.4, 135.2, 130.5, 128.5, 128.2, 128.1, 127.7, 127.6, 122.5, 103.8, 90.7, 29.7, 24.1, 22.2, 21.6.

**HRMS** (ESI) *m/z*: [M+Na]<sup>+</sup> calcd for C<sub>19</sub>H<sub>16</sub>O<sub>2</sub>S<sub>2</sub>Na<sup>+</sup>, 363.0484; found 363.0482.

**IR** (neat) *v* (cm<sup>-1</sup>): 3100, 2933, 1642, 1600, 1565, 1486, 1258, 1208.

**(Z)-1-cyclopropyl-2-(3-cyclopropyl-5,6,7,8-tetrahydro-1H-isochromen-1-ylidene)ethan-1-one (4x)**

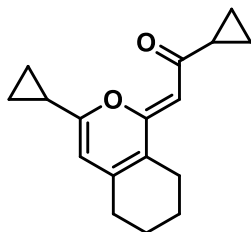

68 mg (53% yield) yellow sticky liquid, purified by flash column chromatography (SiO<sub>2</sub>, Ethyl acetate: n-hexane, 1:20). R<sub>f</sub> = 0.35.

<sup>1</sup>H NMR (CDCl<sub>3</sub>, 600 MHz): δ 5.63 (s, 1H), 5.32 (s, 1H), 2.31 (t, *J* = 6.3 Hz, 2H), 2.15 (t, *J* = 6.4 Hz, 2H), 1.99 (dt, *J* = 8.0, 3.5 Hz, 1H), 1.77 – 1.73 (m, 2H), 1.67 (m, 3H), 1.22 (dt, *J* = 6.6, 3.4 Hz, 2H), 1.04 – 1.01 (m, 2H), 0.87 (td, *J* = 7.1, 4.3 Hz, 2H), 0.74 (m, 2H).

<sup>13</sup>C NMR (CDCl<sub>3</sub>, 151 MHz): δ 195.6, 161.7, 159.6, 142.5, 119.9, 104.3, 94.9, 29.5, 23.9, 22.3, 21.6, 21.4, 13.8, 9.7, 7.3.

HRMS (ESI) *m/z*: [M+Na]<sup>+</sup> calcd for C<sub>17</sub>H<sub>20</sub>O<sub>2</sub>Na<sup>+</sup>, 279.1355; found 279.1351.

IR (neat) *v* (cm<sup>-1</sup>): 3006, 2920, 1690, 1654, 1506, 1385, 1277, 1063.

#### 2.4 Synthesis and characterization of product 6

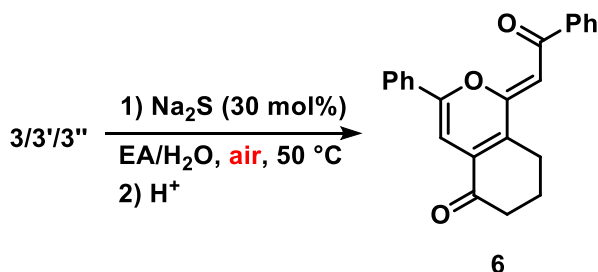

A 25 mL round-bottomed flask was charged with 0.5 mmol of the freshly prepared raw material **3**, followed by the addition of 5 mL of ethyl acetate (EA) to dissolve the material. To this solution, an aqueous sodium sulfide solution (11.7 mg Na<sub>2</sub>S in water, corresponding to 0.15 mmol) was added. The reaction mixture was stirred under an atmospheric air environment at 50 °C, and its progress was monitored by thin-layer chromatography (TLC). Upon completion of the reaction, the mixture was cooled to room temperature and neutralized by the addition of 2 mL of a 1 mol/L hydrochloric acid. The product was then extracted into dichloromethane (DCM) in three portions (3 × 3 mL). The combined organic phases were dried over magnesium sulfate (MgSO<sub>4</sub>), filtered, and the solvent was removed under reduced pressure. The residue was purified by flash column chromatography on silica gel using a gradient elution with a solvent system of n-hexane and ethyl acetate, starting from a ratio of 10:1 to 6:1, to afford the desired products **6**.

**(Z)-1-(2-oxo-2-phenylethylidene)-3-phenyl-7,8-dihydro-1H-isochromen-5(6H)-one (6a)**

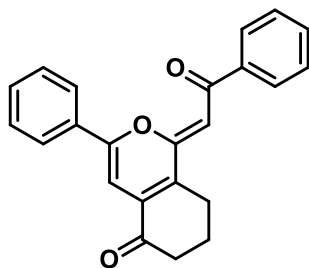

133 mg (78% yield) orange solid, purified by flash column chromatography (SiO<sub>2</sub>, Ethyl acetate: n-hexane, 1:6). R<sub>f</sub> = 0.25.

**m.p.** = 206.9-208.3 °C

**<sup>1</sup>H NMR** (CDCl<sub>3</sub>, 600 MHz): δ 8.14 – 8.08 (m, 2H), 7.99 – 7.94 (m, 2H), 7.55 – 7.40 (m, 6H), 7.07 (s, 1H), 6.36 (s, 1H), 2.70 – 2.62 (m, 4H), 2.22 (m, 2H).

**<sup>13</sup>C NMR** (CDCl<sub>3</sub>, 151 MHz): δ 195.4, 187.7, 160.9, 155.6, 140.9, 136.0, 133.9, 131.7, 131.5, 130.5, 129.0, 128.6, 127.7, 125.4, 97.4, 95.7, 37.4, 24.2, 21.5.

**HRMS** (ESI) m/z: [M+H]<sup>+</sup> calcd for C<sub>23</sub>H<sub>19</sub>O<sub>3</sub><sup>+</sup>, 343.1328; found 343.1320.

**IR** (neat) ν (cm<sup>-1</sup>): 3053, 2933, 1682, 1620, 1482, 1448, 1200, 1161, 1020.

**(Z)-3-(2-methoxyphenyl)-1-(2-(2-methoxyphenyl)-2-oxoethylidene)-7,8-dihydro-1H-isochromen-5(6H)-one (6b)**

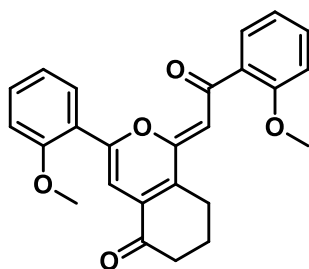

108 mg (54% yield) orange solid, purified by flash column chromatography (SiO<sub>2</sub>, Ethyl acetate: n-hexane, 1:3). R<sub>f</sub> = 0.25.

**m.p.** = 129.0-129.3 °C

**<sup>1</sup>H NMR** (CDCl<sub>3</sub>, 600 MHz): δ 8.50 (dd, *J* = 7.9, 1.8 Hz, 1H), 7.66 (dd, *J* = 7.6, 1.8 Hz, 1H), 7.55 (s, 1H), 7.42 – 7.34 (m, 2H), 7.15 – 7.10 (m, 1H), 7.03 (td, *J* = 7.4, 1.0 Hz, 1H), 6.95 (m, 2H), 6.31 (s, 1H), 3.96 (s, 3H), 3.88 (s, 3H), 2.61 (dt, *J* = 12.5, 6.4 Hz, 4H), 2.20 – 2.14 (m, 2H).

<sup>13</sup>C NMR (CDCl<sub>3</sub>, 151 MHz): δ 195.6, 188.4, 159.8, 157.6, 157.3, 152.5, 135.8, 134.3, 132.3, 131.8, 131.1, 130.1, 129.1, 121.4, 120.9, 120.3, 111.7, 111.0, 101.8, 101.2, 55.9, 55.6, 37.6, 24.2, 21.6.

HRMS (ESI) m/z: [M+Na]<sup>+</sup> calcd for C<sub>25</sub>H<sub>22</sub>O<sub>5</sub>Na<sup>+</sup>, 425.1359; found 425.1350.

IR (neat) ν (cm<sup>-1</sup>): 3153, 3053, 2933, 1680, 1621, 1593, 1564, 1508, 1252, 1021.

**(Z)-3-(3-methoxyphenyl)-1-(2-(3-methoxyphenyl)-2-oxoethylidene)-7,8-dihydro-1H-isochromen-5(6H)-one (6c)**

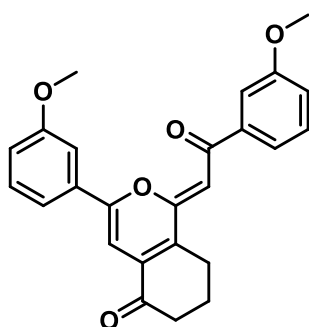

149 mg (74% yield) red solid, purified by flash column chromatography (SiO<sub>2</sub>, Ethyl acetate: n-hexane, 1:3). R<sub>f</sub> = 0.20.

m.p. = 149.3-149.6 °C

<sup>1</sup>H NMR (CDCl<sub>3</sub>, 600 MHz): δ 7.81 (dd, *J* = 2.6, 1.6 Hz, 1H), 7.70 (ddd, *J* = 7.8, 1.6, 0.9 Hz, 1H), 7.53 – 7.49 (m, 2H), 7.37 (dt, *J* = 13.8, 8.0 Hz, 2H), 7.08 – 7.03 (m, 1H), 7.05 (s, 2H), 6.98 (ddd, *J* = 8.2, 2.6, 0.9 Hz, 1H), 6.34 (s, 1H), 3.96 (s, 3H), 3.88 (s, 3H), 2.68 – 2.62 (m, 4H), 2.21 (m, 2H).

<sup>13</sup>C NMR (CDCl<sub>3</sub>, 151 MHz): δ 195.4, 187.0, 160.8, 160.1, 159.9, 155.3, 142.4, 136.1, 133.9, 132.9, 130.0, 129.5, 120.1, 117.9, 117.8, 117.2, 112.6, 110.2, 97.3, 95.9, 55.7, 55.6, 37.4, 24.2, 21.5.

HRMS (ESI) m/z: [M+Na]<sup>+</sup> calcd for C<sub>25</sub>H<sub>22</sub>O<sub>5</sub>Na<sup>+</sup>, 425.1359; found 425.1352.

IR (neat) ν (cm<sup>-1</sup>): 3046, 2933, 1690, 1624, 1576, 1513, 1257, 1169, 1033.

**(Z)-3-(4-methoxyphenyl)-1-(2-(4-methoxyphenyl)-2-oxoethylidene)-7,8-dihydro-1H-isochromen-5(6H)-one (6d)**

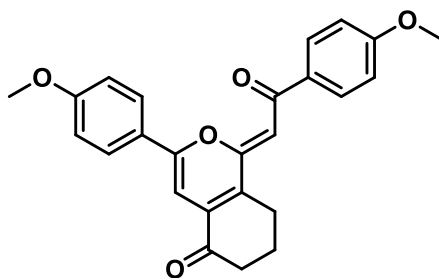

158 mg (79% yield) red solid, purified by flash column chromatography (SiO<sub>2</sub>, Ethyl acetate: n-hexane, 1:4). R<sub>f</sub> = 0.20.

**m.p.** = 202.7-203.2 °C

**<sup>1</sup>H NMR** (CDCl<sub>3</sub>, 600 MHz): δ 8.10 – 8.05 (m, 2H), 7.98 – 7.92 (m, 2H), 7.02 – 6.96 (m, 2H), 6.97 – 6.92 (m, 2H), 6.91 (s, 1H), 6.30 (s, 1H), 3.86 (d, *J* = 9.3 Hz, 6H), 2.67 – 2.60 (m, 4H), 2.23 – 2.16 (m, 2H).

**<sup>13</sup>C NMR** (CDCl<sub>3</sub>, 151 MHz): δ 195.7, 186.4, 162.6, 161.5, 160.7, 155.6, 134.8, 134.0, 133.8, 129.8, 127.2, 124.3, 114.4, 113.7, 96.8, 94.0, 55.6, 55.5, 37.5, 24.2, 21.6.

**HRMS** (ESI) *m/z*: [M+H]<sup>+</sup> calcd for C<sub>25</sub>H<sub>23</sub>O<sub>5</sub><sup>+</sup>, 403.1540; found 403.1527.

**IR** (neat) *v* (cm<sup>-1</sup>): 3060, 2933, 2833, 1690, 1626, 1599, 1570, 1501, 1255, 1017.

**(Z)-3-(3,4-dimethoxyphenyl)-1-(2-(3,4-dimethoxyphenyl)-2-oxoethylidene)-7,8-dihydro-1H-isochromen-5(6H)-one (6e)**

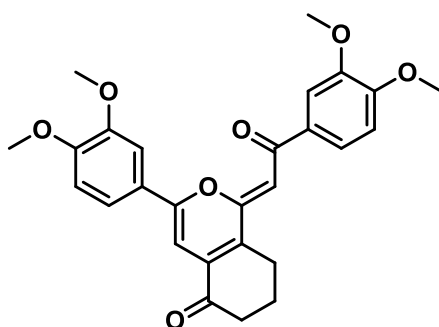

185 mg (80% yield) red solid, purified by flash column chromatography (SiO<sub>2</sub>, Ethyl acetate: n-hexane, 1:3). R<sub>f</sub> = 0.20.

**m.p.** = 173.5-174.0 °C

**<sup>1</sup>H NMR** (CDCl<sub>3</sub>, 600 MHz): δ 7.79 – 7.76 (m, 2H), 7.59 (d, *J* = 2.0 Hz, 1H), 7.55 (dd, *J* = 8.3, 2.0 Hz, 1H), 6.97 (d, *J* = 8.4 Hz, 1H), 6.92 (s, 1H), 6.88 (d, *J* = 8.3 Hz, 1H), 6.33 (s, 1H), 4.07 (s, 3H), 3.97 (s, 3H), 3.94 (d, *J* = 7.2 Hz, 6H), 2.65 (dt, *J* = 10.8, 6.7 Hz, 4H), 2.20 (m, 2H).

**<sup>13</sup>C NMR** (CDCl<sub>3</sub>, 151 MHz): δ 195.7, 185.9, 160.5, 155.5, 152.3, 151.1, 149.3, 149.2, 135.0, 134.1, 133.9, 124.6, 121.4, 118.9, 111.2, 110.6, 110.1, 108.4, 96.6, 94.2, 56.4, 56.2, 56.1, 37.5, 24.1, 21.6.

**HRMS** (ESI) *m/z*: [M+Na]<sup>+</sup> calcd for C<sub>27</sub>H<sub>26</sub>O<sub>7</sub>Na<sup>+</sup>, 485.1570; found 485.1565.

**IR** (neat) *v* (cm<sup>-1</sup>): 3080, 2940, 1684, 1625, 1593, 1580, 1563, 1504, 1256, 1162, 1019.

**(Z)-3-(5-fluoro-2-methoxyphenyl)-1-(2-(5-fluoro-2-methoxyphenyl)-2-oxoethylidene)-7,8-dihydro-1H-isochromen-5(6H)-one (6f)**

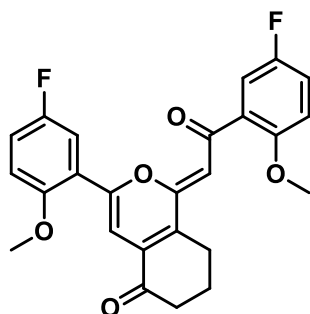

151 mg (69% yield) red solid, purified by flash column chromatography (SiO<sub>2</sub>, Ethyl acetate: n-hexane, 1:6). R<sub>f</sub> = 0.20.

**m.p.** = 193.8-194.4 °C

**<sup>1</sup>H NMR** (CDCl<sub>3</sub>, 600 MHz): δ 8.28 (dd, *J* = 10.0, 3.2 Hz, 1H), 7.58 (s, 1H), 7.40 (dd, *J* = 8.7, 3.2 Hz, 1H), 7.06 (m, 2H), 6.88 (td, *J* = 8.9, 4.2 Hz, 2H), 6.33 (s, 1H), 3.93 (s, 3H), 3.86 (s, 3H), 2.64 – 2.58 (m, 4H), 2.20 – 2.15 (m, 2H).

**<sup>13</sup>C NMR** (CDCl<sub>3</sub>, 151 MHz): δ 195.4, 186.6, 159.9, 157.2 (d, *J*<sub>FC</sub> = 238.6 Hz), 157.2 (d, *J*<sub>FC</sub> = 240.1 Hz), 153.9, 153.5, 151.3, 136.5, 134.1, 133.0 (d, *J*<sub>FC</sub> = 5.9 Hz), 121.3 (d, *J*<sub>FC</sub> = 8.2 Hz), 118.0 (d, *J*<sub>FC</sub> = 23.2 Hz), 117.3 (d, *J*<sub>FC</sub> = 23.3 Hz), 116.7 (d, *J*<sub>FC</sub> = 24.1 Hz), 115.4 (d, *J*<sub>FC</sub> = 25.1 Hz), 113.1 (d, *J*<sub>FC</sub> = 7.6 Hz), 112.1 (d, *J*<sub>FC</sub> = 8.0 Hz), 102.0 (d, *J*<sub>FC</sub> = 5.1 Hz), 101.5, 56.6, 56.2, 37.5, 24.1, 21.5.

**<sup>19</sup>F NMR** (CDCl<sub>3</sub>, 565 MHz): δ -121.32, -123.12.

**HRMS** (ESI) *m/z*: [M+Na]<sup>+</sup> calcd for C<sub>25</sub>H<sub>20</sub>F<sub>2</sub>O<sub>5</sub>Na<sup>+</sup>, 461.1171; found 461.1165.

**IR** (neat) *v* (cm<sup>-1</sup>): 3140, 3046, 2947, 1686, 1624, 1563, 1486, 1411, 1261, 1162.

**(Z)-3-([1,1'-biphenyl]-4-yl)-1-(2-([1,1'-biphenyl]-4-yl)-2-oxoethylidene)-7,8-dihydro-1H-isochromen-5(6H)-one (6g)**

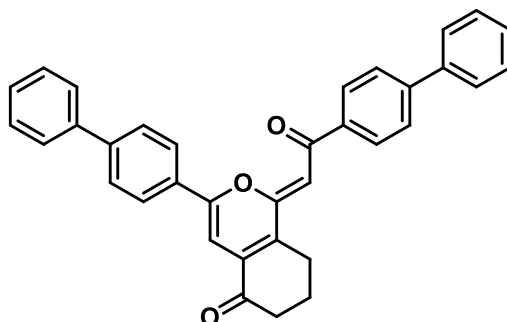

146 mg (59% yield) red solid, purified by flash column chromatography (SiO<sub>2</sub>, Ethyl acetate: n-hexane, 1:6). R<sub>f</sub> = 0.3.

**m.p.** = 131.8-132.3 °C

**<sup>1</sup>H NMR** (CDCl<sub>3</sub>, 600 MHz): δ 8.19 – 8.14 (m, 2H), 8.08 – 8.03 (m, 2H), 7.74 – 7.68 (m, 4H), 7.67 – 7.59 (m, 4H), 7.49 – 7.45 (m, 4H), 7.43 – 7.34 (m, 2H), 7.12 (s, 1H), 6.41 (s, 1H), 2.70 (dt, *J* = 27.2, 6.8 Hz, 4H), 2.24 (m, 2H).

**<sup>13</sup>C NMR** (CDCl<sub>3</sub>, 101 MHz): δ 195.4, 187.2, 160.9, 155.3, 144.4, 143.1, 140.3, 139.6, 135.9, 133.9, 130.4, 129.1, 129.0, 128.3, 128.1, 127.9, 127.6, 127.3, 127.2, 127.2, 125.9, 97.4, 95.8, 37.4, 29.8, 24.2, 21.5.

**HRMS** (ESI) *m/z*: [M+H]<sup>+</sup> calcd for C<sub>35</sub>H<sub>27</sub>O<sub>3</sub><sup>+</sup>, 495.1954; found 495.1952.

**IR** (neat) *v* (cm<sup>-1</sup>): 3045, 2935, 1680, 1628, 1604, 1559, 1509, 1485, 1186.

**(Z)-1-(2-oxo-2-(*o*-tolyl)ethylidene)-3-(*o*-tolyl)-7,8-dihydro-1H-isochromen-5(6H)-one (6h)**

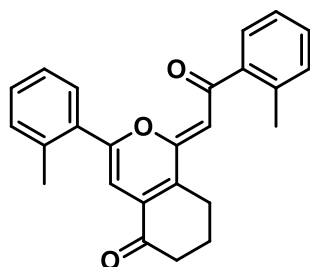

89 mg (48% yield) orange sticky liquid, purified by flash column chromatography (SiO<sub>2</sub>, Ethyl acetate: n-hexane, 1:6). R<sub>f</sub> = 0.25.

**<sup>1</sup>H NMR** (CDCl<sub>3</sub>, 600 MHz): δ 7.49 (dd, *J* = 7.7, 1.4 Hz, 1H), 7.43 (dd, *J* = 7.6, 1.5 Hz, 1H), 7.29 (td, *J* = 7.5, 1.4 Hz, 1H), 7.25 – 7.19 (m, 3H), 7.18 – 7.14 (m, 2H), 6.68 (s, 1H), 5.96 (s, 1H), 2.65 – 2.57 (m, 4H), 2.47 (s, 3H), 2.44 (s, 3H), 2.19 (m, 2H).

**<sup>13</sup>C NMR** (CDCl<sub>3</sub>, 151 MHz): δ 195.3, 192.5, 160.2, 157.0, 142.6, 137.0, 135.8, 133.6, 132.0, 131.3, 131.1, 129.9, 129.6, 129.0, 127.2, 126.1, 125.6, 101.7, 100.3, 37.4, 29.8, 24.2, 21.5, 21.4, 20.2.

**HRMS** (ESI) *m/z*: [M+Na]<sup>+</sup> calcd for C<sub>25</sub>H<sub>22</sub>O<sub>3</sub>Na<sup>+</sup>, 393.1461; found 393.1454.

**IR** (neat) *v* (cm<sup>-1</sup>): 3000, 2927, 1682, 1636, 1567, 1524, 1278, 1256.

**(Z)-1-(2-oxo-2-(p-tolyl)ethylidene)-3-(p-tolyl)-7,8-dihydro-1H-isochromen-5(6H)-one (6i)**

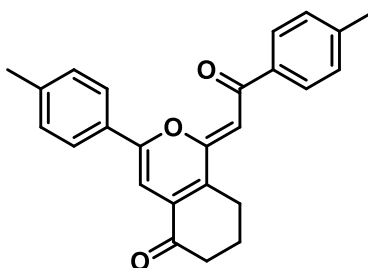

94 mg (51% yield) orange solid, purified by flash column chromatography (SiO<sub>2</sub>, Ethyl acetate: n-hexane, 1:6). R<sub>f</sub> = 0.25.

**m.p.** = 211.5-212.2 °C

**<sup>1</sup>H NMR** (CDCl<sub>3</sub>, 600 MHz): δ 8.00 (d, *J* = 8.0 Hz, 2H), 7.87 (d, *J* = 7.9 Hz, 2H), 7.30 – 7.24 (m, 4H), 7.01 (s, 1H), 6.33 (s, 1H), 2.66 (dt, *J* = 14.0, 6.4 Hz, 4H), 2.41 (d, *J* = 13.3 Hz, 6H), 2.21 (dt, *J* = 6.2 Hz, 2H).

**<sup>13</sup>C NMR** (CDCl<sub>3</sub>, 151 MHz): δ 195.6, 187.5, 160.8, 155.8, 142.3, 140.8, 138.4, 135.5, 133.9, 129.7, 129.3, 128.8, 127.8, 125.4, 97.2, 94.9, 37.4, 24.2, 21.7, 21.5.

**HRMS** (ESI) *m/z*: [M+H]<sup>+</sup> calcd for C<sub>25</sub>H<sub>23</sub>O<sub>3</sub><sup>+</sup>, 371.1641; found 371.1633.

**IR** (neat) *v* (cm<sup>-1</sup>): 3004, 2925, 1689, 1629, 1608, 1523, 1508, 1275, 1258.

**(Z)-1-(2-oxo-2-(4-(trifluoromethoxy)phenyl)ethylidene)-3-(4-(trifluoromethoxy)phenyl)-7,8-dihydro-1H-isochromen-5(6H)-one (6j)**



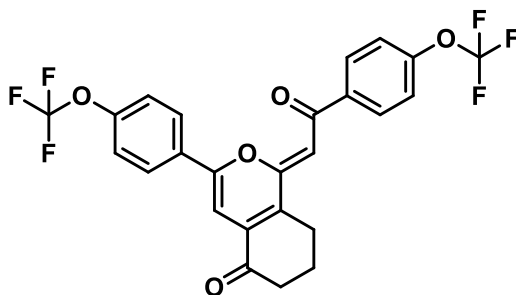

194 mg (76% yield) red solid, purified by flash column chromatography (SiO<sub>2</sub>, Ethyl acetate: n-hexane, 1:6). R<sub>f</sub> = 0.25.

**m.p.** = 138.1-138.9 °C

**<sup>1</sup>H NMR** (CDCl<sub>3</sub>, 600 MHz): δ 8.17 (dd, *J* = 8.7, 1.7 Hz, 2H), 7.99 (dd, *J* = 8.6, 1.7 Hz, 2H), 7.31 (dd, *J* = 20.3, 8.3 Hz, 4H), 7.07 (s, 1H), 6.33 (s, 1H), 2.70 – 2.63 (m, 4H), 2.26 – 2.19 (m, 2H).

**<sup>13</sup>C NMR** (CDCl<sub>3</sub>, 151 MHz): δ 195.1, 185.9, 161.2, 154.3, 151.8, 150.8, 139.1, 136.2, 134.0, 130.0, 129.6, 127.2, 121.3, 120.6, 120.5 (q, *J*<sub>FC</sub> = 258.2 Hz), 97.0, 96.4, 77.4, 77.2, 76.9, 37.4, 24.2, 21.5.

(the two -OCF<sub>3</sub> are very similar. Δδ < ±0.05 ppm)

**<sup>19</sup>F NMR** (CDCl<sub>3</sub>, 565 MHz): δ -57.52, -57.60.

**HRMS** (ESI) *m/z*: [M+Na]<sup>+</sup> calcd for C<sub>25</sub>H<sub>16</sub>F<sub>6</sub>O<sub>5</sub>Na<sup>+</sup>, 533.0794; found 533.0793.

**IR** (neat) *v* (cm<sup>-1</sup>): 3073, 2954, 1683, 1630, 1516, 1496, 1260, 1203, 1151, 1044.

**(Z)-3-(3-fluorophenyl)-1-(2-(3-fluorophenyl)-2-oxoethylidene)-7,8-dihydro-1H-isochromen-5(6H)-one (6k)**

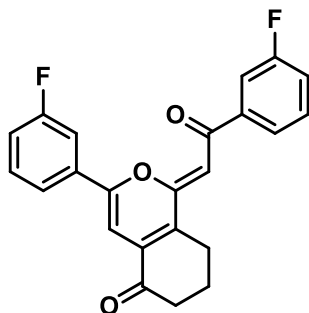

128 mg (68% yield) red solid, purified by flash column chromatography (SiO<sub>2</sub>, Ethyl acetate: n-hexane, 1:6). R<sub>f</sub> = 0.25.

**m.p.** = 212.0-212.7 °C

**<sup>1</sup>H NMR** (CDCl<sub>3</sub>, 600 MHz): δ 7.93 (ddd, *J* = 7.9, 1.7, 0.9 Hz, 1H), 7.82 (ddd, *J* = 10.0, 2.6, 1.7 Hz, 1H), 7.73 (dt, *J* = 7.7, 1.2 Hz, 1H), 7.65 (ddd, *J* = 9.6, 2.6, 1.6 Hz, 1H), 7.45 (dtd, *J* = 13.3, 8.0, 5.6 Hz, 2H), 7.22 (tdd, *J* = 8.3, 2.7, 0.9 Hz, 1H), 7.13 (tdd, *J* = 8.2, 2.6, 0.9 Hz, 1H), 7.08 (s, 1H), 6.32 (s, 1H), 2.68 (dt, *J* = 13.8, 6.4 Hz, 4H), 2.23 (dt, *J* = 12.2, 6.3 Hz, 2H).

**<sup>13</sup>C NMR** (CDCl<sub>3</sub>, 151 MHz): δ 195.1, 186.0, 163.2 (d, *J*<sub>FC</sub> = 246.1 Hz), 163.1 (d, *J*<sub>FC</sub> = 247.6 Hz), 161.1, 154.3, 143.0 (d, *J*<sub>FC</sub> = 6.0 Hz), 136.5, 133.9, 133.6 (d, *J*<sub>FC</sub> = 8.1 Hz), 130.7 (d, *J*<sub>FC</sub> = 8.1 Hz), 130.2 (d, *J*<sub>FC</sub> = 7.7 Hz), 123.4 (d, *J*<sub>FC</sub> = 2.9 Hz), 121.2 (d, *J*<sub>FC</sub> = 3.1 Hz), 118.8 (d, *J*<sub>FC</sub> = 21.3 Hz), 117.6 (d, *J*<sub>FC</sub> = 21.5 Hz), 114.7 (d, *J*<sub>FC</sub> = 22.2 Hz), 112.5 (d, *J*<sub>FC</sub> = 24.1 Hz), 97.1, 96.7, 37.4, 24.2, 21.5.

**<sup>19</sup>F NMR** (CDCl<sub>3</sub>, 565 MHz): δ -111.36, -112.23.

**HRMS** (ESI) *m/z*: [M+Na]<sup>+</sup> calcd for C<sub>23</sub>H<sub>16</sub>F<sub>2</sub>O<sub>3</sub>Na<sup>+</sup>, 401.0959; found 401.0954.

**IR** (neat) *v* (cm<sup>-1</sup>): 3073, 2954, 1679, 1628, 1563, 1510, 1318, 1111.

**(Z)-3-(4-fluorophenyl)-1-(2-(4-fluorophenyl)-2-oxoethylidene)-7,8-dihydro-1H-isochromen-5(6H)-one (6l)**

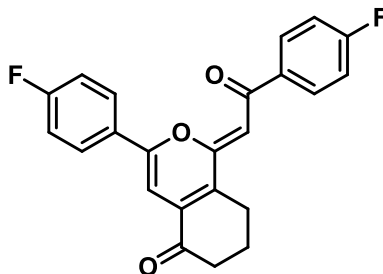

136 mg (72% yield) red solid, purified by flash column chromatography (SiO<sub>2</sub>, Ethyl acetate: n-hexane, 1:6). *R*<sub>f</sub> = 0.25.

**m.p.** = 234.7-235.2 °C

**<sup>1</sup>H NMR** (CDCl<sub>3</sub>, 600 MHz): δ 8.16 – 8.10 (m, 2H), 8.00 – 7.93 (m, 2H), 7.20 – 7.10 (m, 4H), 7.00 (s, 1H), 6.31 (s, 1H), 2.65 (dt, *J* = 9.6, 6.8 Hz, 4H), 2.25 – 2.18 (m, 2H).

**<sup>13</sup>C NMR** (CDCl<sub>3</sub>, 151 MHz): δ 195.3, 186.0, 165.1 (d, *J*<sub>FC</sub> = 253.7 Hz), 164.2 (d, *J*<sub>FC</sub> = 250.7 Hz), 161.0, 154.7, 137.1, 135.7, 134.0, 130.1 (d, *J*<sub>FC</sub> = 9.0 Hz), 127.7, 127.6 (d, *J*<sub>FC</sub> = 8.7 Hz), 116.2 (d, *J*<sub>FC</sub> = 22.0 Hz), 115.6 (d, *J*<sub>FC</sub> = 21.7 Hz), 96.8, 95.5, 37.4, 24.2, 21.5.

**<sup>19</sup>F NMR** (CDCl<sub>3</sub>, 565 MHz): δ -107.67, -109.16.

**HRMS** (ESI)  $m/z$ :  $[M+Na]^+$  calcd for  $C_{23}H_{16}F_2O_3Na^+$ , 401.0959; found 401.0952.

**IR** (neat)  $\nu$  ( $cm^{-1}$ ): 3080, 2927, 1682, 1627, 1593, 1565, 1502, 1203, 1157, 837.

**(Z)-3-(2-chlorophenyl)-1-(2-(2-chlorophenyl)-2-oxoethylidene)-7,8-dihydro-1H-isochromen-5(6H)-one (6m)**

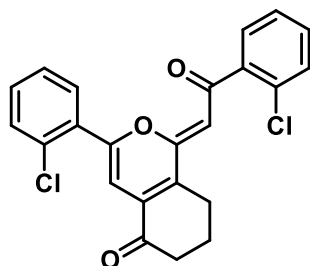

144 mg (70% yield) orange solid, purified by flash column chromatography ( $SiO_2$ , Ethyl acetate: *n*-hexane, 1:6).  $R_f$  = 0.25.

**m.p.** = 149.5-150.6 °C

**$^1H$  NMR** ( $CD_2Cl_2$ , 600 MHz):  $\delta$  7.75 (dt,  $J$  = 7.4, 2.3 Hz, 1H), 7.47 – 7.39 (m, 2H), 7.38 – 7.31 (m, 2H), 7.26 (t,  $J$  = 7.9 Hz, 2H), 7.22 (dd,  $J$  = 8.7, 6.4 Hz, 1H), 7.15 (s, 1H), 6.01 (s, 1H), 2.61 (t,  $J$  = 6.5 Hz, 4H), 2.18 (dt,  $J$  = 5.6 Hz, 2H).

**$^{13}C$  NMR** ( $CDCl_3$ , 151 MHz):  $\delta$  195.1, 189.2, 160.9, 152.9, 142.5, 137.2, 133.6, 132.2, 131.1, 131.0, 130.9, 130.7, 130.5, 130.2, 128.9, 127.5, 127.2, 102.3, 102.2, 37.5, 24.4, 21.7.

**HRMS** (ESI)  $m/z$ :  $[M+Na]^+$  calcd for  $C_{23}H_{16}Cl_2O_3Na^+$ , 433.0368; found 433.0363.

**IR** (neat)  $\nu$  ( $cm^{-1}$ ): 3073, 2933, 1686, 1625, 1510, 1431, 1290, 1038.

**(Z)-3-(3-chlorophenyl)-1-(2-(3-chlorophenyl)-2-oxoethylidene)-7,8-dihydro-1H-isochromen-5(6H)-one (6n)**

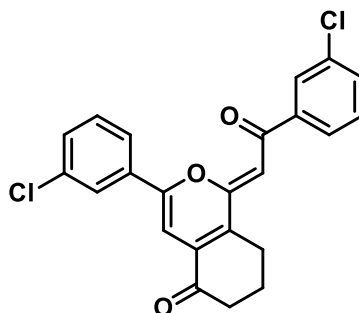

129 mg (63% yield) red solid, purified by flash column chromatography (SiO<sub>2</sub>, Ethyl acetate: n-hexane, 1:6). R<sub>f</sub> = 0.25.

**m.p.** = 217.0-217.3 °C

**<sup>1</sup>H NMR** (CDCl<sub>3</sub>, 600 MHz): δ 8.09 (dt, *J* = 7.8, 1.4 Hz, 1H), 8.01 (t, *J* = 1.9 Hz, 1H), 7.92 (t, *J* = 1.8 Hz, 1H), 7.83 (dt, *J* = 7.6, 1.3 Hz, 1H), 7.49 (ddd, *J* = 8.0, 2.1, 1.1 Hz, 1H), 7.44 (t, *J* = 7.8 Hz, 1H), 7.40 (ddt, *J* = 7.9, 5.4, 3.1 Hz, 2H), 7.26 (s, 1H), 7.08 (s, 1H), 6.30 (s, 1H), 2.68 (dt, *J* = 13.9, 6.7 Hz, 4H), 2.27 – 2.20 (m, 2H).

**<sup>13</sup>C NMR** (CDCl<sub>3</sub>, 151 MHz): δ 195.1, 185.9, 161.0, 154.1, 142.4, 136.5, 135.1, 134.8, 133.9, 133.2, 131.8, 130.6, 130.5, 129.9, 127.9, 125.9, 125.3, 123.7, 97.1, 96.7, 37.3, 24.2, 21.4.

**HRMS** (ESI) *m/z*: [M+Na]<sup>+</sup> calcd for C<sub>23</sub>H<sub>16</sub>Cl<sub>2</sub>O<sub>3</sub>Na<sup>+</sup>, 433.0368; found 433.0361.

**IR** (neat) *v* (cm<sup>-1</sup>): 3060, 2927, 1685, 1626, 1563, 1513, 1255, 1204, 1046.

**(Z)-3-(4-chlorophenyl)-1-(2-(4-chlorophenyl)-2-oxoethylidene)-7,8-dihydro-1H-isochromen-5(6H)-one (60)**

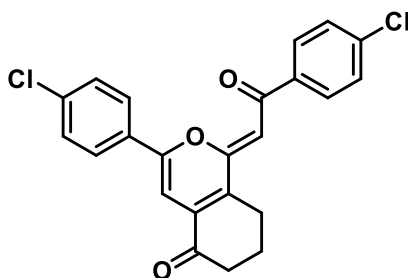

127 mg (62% yield) red solid, purified by flash column chromatography (SiO<sub>2</sub>, Ethyl acetate: n-hexane, 1:6). R<sub>f</sub> = 0.25.

**m.p.** = 210.9-211.2 °C

**<sup>1</sup>H NMR** (CDCl<sub>3</sub>, 600 MHz): δ 8.09 – 8.04 (m, 2H), 7.92 – 7.87 (m, 2H), 7.49 – 7.41 (m, 4H), 7.07 (s, 1H), 6.32 (s, 1H), 2.70 – 2.63 (m, 4H), 2.23 (dt, *J* = 12.3, 6.2 Hz, 2H).

**<sup>13</sup>C NMR** (CDCl<sub>3</sub>, 151 MHz): δ 195.2, 186.2, 161.1, 154.6, 139.1, 138.1, 136.7, 136.1, 134.0, 129.9, 129.3, 129.2, 128.9, 126.7, 96.9, 96.1, 37.4, 24.2, 21.5.

**HRMS** (ESI) *m/z*: [M+H]<sup>+</sup> calcd for C<sub>23</sub>H<sub>17</sub>Cl<sub>2</sub>O<sub>3</sub><sup>+</sup>, 411.0549; found 411.0541.

**IR** (neat) *v* (cm<sup>-1</sup>): 3094, 2940, 1681, 1627, 1587, 1566, 1518, 1485, 1089, 1003.

**(Z)-3-(2,4-dichlorophenyl)-1-(2-(2,4-dichlorophenyl)-2-oxoethylidene)-7,8-dihydro-1H-isochromen-5(6H)-one (6p)**

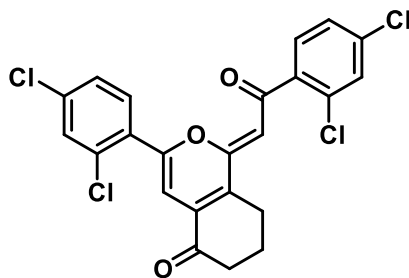

165 mg (69% yield) red solid, purified by flash column chromatography (SiO<sub>2</sub>, Ethyl acetate: n-hexane, 1:6). R<sub>f</sub> = 0.25.

**m.p.** = 192.8-193.3 °C

**<sup>1</sup>H NMR** (CDCl<sub>3</sub>, 600 MHz): δ 7.74 (d, *J* = 8.5 Hz, 1H), 7.46 (d, *J* = 2.1 Hz, 1H), 7.37 (d, *J* = 8.2 Hz, 1H), 7.34 (dd, *J* = 8.5, 2.1 Hz, 1H), 7.26 (d, *J* = 2.0 Hz, 1H), 7.24 (dd, *J* = 8.2, 2.0 Hz, 1H), 7.21 (s, 1H), 6.01 (s, 1H), 2.67 – 2.59 (m, 4H), 2.21 (dt, *J* = 12.2, 6.3 Hz, 2H).

**<sup>13</sup>C NMR** (CDCl<sub>3</sub>, 151 MHz): δ 194.7, 188.3, 160.7, 152.1, 140.5, 136.8, 136.6, 136.0, 133.6, 132.9, 131.4, 130.9, 130.7, 129.9, 129.7, 128.9, 127.8, 127.4, 102.3, 102.1, 37.3, 24.1, 21.3.

**HRMS** (ESI) *m/z*: [M+Na]<sup>+</sup> calcd for C<sub>23</sub>H<sub>14</sub>Cl<sub>4</sub>O<sub>3</sub>Na<sup>+</sup>, 500.9589; found 500.9582.

**IR** (neat) *v* (cm<sup>-1</sup>): 3060, 2920, 1681, 1621, 1581, 1562, 1515, 1202, 1026.

**(Z)-3-(3-bromophenyl)-1-(2-(3-bromophenyl)-2-oxoethylidene)-7,8-dihydro-1H-isochromen-5(6H)-one (6q)**

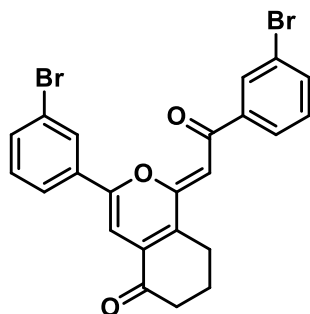

157 mg (63% yield) orange solid, purified by flash column chromatography (SiO<sub>2</sub>, Ethyl acetate: n-hexane, 1:6). R<sub>f</sub> = 0.25.

**m.p.** = 103.7-105.0 °C

**<sup>1</sup>H NMR** (CDCl<sub>3</sub>, 600 MHz): δ 8.15 (dq, *J* = 4.2, 1.5 Hz, 2H), 8.08 (t, *J* = 1.8 Hz, 1H), 7.87 (dt, *J* = 7.8, 1.3 Hz, 1H), 7.64 (ddd, *J* = 7.9, 2.0, 1.0 Hz, 1H), 7.56 (ddd, *J* = 8.0, 1.9, 1.1 Hz, 1H), 7.36 (dt, *J* = 22.9, 8.0 Hz, 2H), 7.08 (s, 1H), 6.29 (s, 1H), 2.72 – 2.64 (m, 4H), 2.24 (dt, *J* = 6.2 Hz, 2H).

**<sup>13</sup>C NMR** (CDCl<sub>3</sub>, 151 MHz): δ 195.1, 185.7, 161.0, 153.9, 142.6, 136.6, 134.7, 133.8, 133.5, 133.4, 130.8, 130.7, 130.2, 128.1, 126.3, 124.1, 123.1, 122.9, 97.0, 96.8, 37.3, 24.2, 21.4.

**HRMS** (ESI) *m/z*: [M+Na]<sup>+</sup> calcd for C<sub>23</sub>H<sub>16</sub>O<sub>3</sub>Br<sub>2</sub>Na<sup>+</sup>, 520.9358; found 520.9354.

**IR** (neat) *v* (cm<sup>-1</sup>): 3060, 2933, 1681, 1627, 1560, 1516, 1253, 1202.

**(Z)-3-(4-bromophenyl)-1-(2-(4-bromophenyl)-2-oxoethylidene)-7,8-dihydro-1H-isochromen-5(6H)-one (6r)**

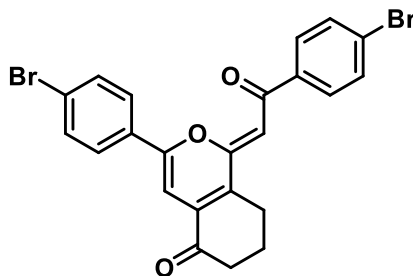

170 mg (68% yield) red solid, purified by flash column chromatography (SiO<sub>2</sub>, Ethyl acetate: n-hexane, 1:6). R<sub>f</sub> = 0.3.

**m.p.** = 214.9-215.7 °C

**<sup>1</sup>H NMR** (CDCl<sub>3</sub>, 600 MHz): δ 8.00 – 7.95 (m, 2H), 7.83 – 7.78 (m, 2H), 7.63 – 7.56 (m, 4H), 7.06 (s, 1H), 6.29 (s, 1H), 2.67 – 2.62 (m, 3H), 2.21 (dt, *J* = 12.2, 6.2 Hz, 2H).

**<sup>13</sup>C NMR** (CDCl<sub>3</sub>, 151 MHz): δ 195.1, 186.2, 161.1, 154.6, 139.5, 136.2, 133.9, 132.3, 131.8, 130.3, 129.3, 126.9, 126.7, 125.1, 96.9, 96.2, 37.3, 24.2, 21.4.

**HRMS** (ESI) *m/z*: [M+H]<sup>+</sup> calcd for C<sub>23</sub>H<sub>17</sub>Br<sub>2</sub>O<sub>3</sub><sup>+</sup>, 498.9539; found 498.9542.

**IR** (neat) *v* (cm<sup>-1</sup>): 3084, 2939, 2864, 1681, 1627, 1581, 1565, 1488, 1005.

**(Z)-3-(4-iodophenyl)-1-(2-(4-iodophenyl)-2-oxoethylidene)-7,8-dihydro-1H-isochromen-5(6H)-one (6s)**

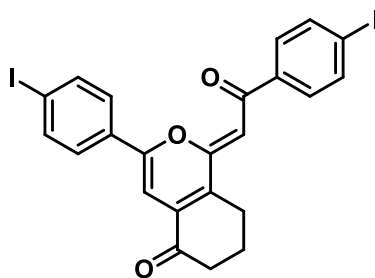

160 mg (54% yield) red solid, purified by flash column chromatography (SiO<sub>2</sub>, Ethyl acetate: n-hexane, 1:6). R<sub>f</sub> = 0.25.

**m.p.** = 229.6-230.0 °C

**<sup>1</sup>H NMR** (CDCl<sub>3</sub>, 600 MHz): δ 7.85 – 7.79 (m, 6H), 7.69 – 7.64 (m, 2H), 7.08 (s, 1H), 6.29 (s, 1H), 2.66 (td, *J* = 7.5, 6.7, 4.1 Hz, 4H), 2.22 (m, 2H).

**<sup>13</sup>C NMR** (CDCl<sub>3</sub>, 101 MHz): δ 195.2, 186.6, 161.1, 154.7, 140.1, 138.2, 137.8, 136.3, 133.9, 130.9, 129.3, 126.9, 99.2, 97.2, 96.9, 96.2, 37.3, 24.2, 21.4.

**HRMS** (ESI) *m/z*: [M+Na]<sup>+</sup> calcd for C<sub>23</sub>H<sub>16</sub>O<sub>3</sub>I<sub>2</sub><sup>+</sup>, 616.9081; found 616.9073.

**IR** (neat) *v* (cm<sup>-1</sup>): 3067, 2920, 1681, 1622, 1582, 1556, 1514, 1483, 1163, 999.

**methyl (Z)-4-(1-(2-(4-(methoxycarbonyl)phenyl)-2-oxoethylidene)-5-oxo-5,6,7,8-tetrahydro-1H-isochromen-3-yl)benzoate (6t)**

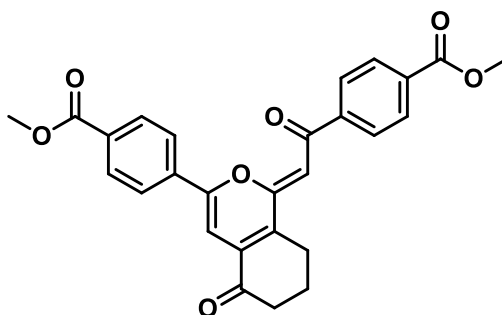

146 mg (64% yield) red solid, purified by flash column chromatography (SiO<sub>2</sub>, Ethyl acetate: n-hexane, 1:1). R<sub>f</sub> = 0.25.

**m.p.** = 228.8-229.2 °C

**<sup>1</sup>H NMR** (CDCl<sub>3</sub>, 600 MHz): δ 8.21 – 8.17 (m, 2H), 8.15 – 8.12 (m, 4H), 8.00 – 7.98 (m, 2H), 7.19 (s, 1H), 6.38 (s, 1H), 3.95 (d, *J* = 8.2 Hz, 6H), 2.69 (dt, *J* = 21.5, 6.8 Hz, 4H), 2.24 (dt, *J* = 6.3 Hz, 2H).

<sup>13</sup>C NMR (CDCl<sub>3</sub>, 151 MHz): δ 195.0, 186.7, 166.6, 161.2, 154.4, 144.3, 136.9, 135.3, 133.9, 132.8, 131.7, 130.2, 129.9, 127.6, 125.3, 97.7, 97.4, 52.5, 52.4, 37.3, 24.2, 21.4.

HRMS (ESI) m/z: [M+Na]<sup>+</sup> calcd for C<sub>27</sub>H<sub>22</sub>O<sub>7</sub>Na<sup>+</sup>, 481.1257; found 481.1249.

IR (neat) ν (cm<sup>-1</sup>): 3087, 2947, 1715, 1682, 1627, 1567, 1527, 1270, 1103.

**(Z)-1-(2-oxo-2-(4-(trifluoromethyl)phenyl)ethylidene)-3-(4-(trifluoromethyl)phenyl)-7,8-dihydro-1H-isochromen-5(6H)-one (6u)**

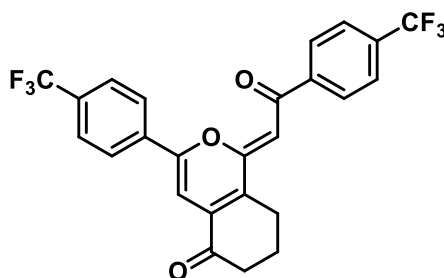

155 mg (65% yield) red solid, purified by flash column chromatography (SiO<sub>2</sub>, Ethyl acetate: n-hexane, 1:8). R<sub>f</sub> = 0.30.

m.p. = 196.3-197.7 °C

<sup>1</sup>H NMR (CDCl<sub>3</sub>, 600 MHz): δ 8.24 (d, J = 8.2 Hz, 2H), 8.05 (d, J = 8.0 Hz, 2H), 7.74 (dd, J = 8.1, 6.0 Hz, 4H), 7.20 (s, 1H), 6.38 (s, 1H), 2.70 (dt, J = 18.2, 6.6 Hz, 4H), 2.25 (m, 2H).

<sup>13</sup>C NMR (CDCl<sub>3</sub>, 151 MHz): δ 195.0, 186.2, 161.3, 154.1, 143.6, 136.9, 134.6, 134.0, 133.3 (q, J<sub>FC</sub> = 33.2 Hz), 132.2 (q, J<sub>FC</sub> = 33.2 Hz), 128.1, 126.1 (q, J<sub>FC</sub> = 3.0 Hz), 125.7 (q, J<sub>FC</sub> = 4.5 Hz), 125.7, 124.0 (q, J<sub>FC</sub> = 273.3 Hz), 123.9 (q, J<sub>FC</sub> = 273.3 Hz), 97.6, 97.3, 37.3, 24.2, 21.4.

<sup>19</sup>F NMR (CDCl<sub>3</sub>, 565 MHz): δ -62.74, -62.79.

HRMS (ESI) m/z: [M+Na]<sup>+</sup> calcd for C<sub>25</sub>H<sub>16</sub>F<sub>6</sub>O<sub>3</sub>Na<sup>+</sup>, 501.0895; found 501.0886.

IR (neat) ν (cm<sup>-1</sup>): 3080, 2947, 1682, 1630, 1564, 1508, 1323, 1161, 1112.

**(Z)-3-(naphthalen-2-yl)-1-(2-(naphthalen-2-yl)-2-oxoethylidene)-7,8-dihydro-1H-isochromen-5(6H)-one (6v)**



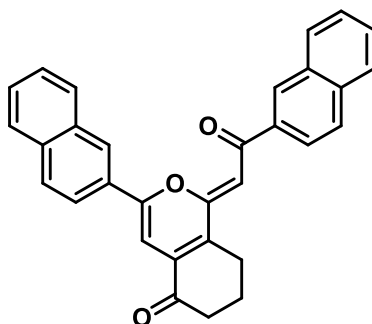

148 mg (67% yield) red solid, purified by flash column chromatography (SiO<sub>2</sub>, Ethyl acetate: n-hexane, 1:6). R<sub>f</sub> = 0.25.

**m.p.** = 192.6-193.0 °C

**<sup>1</sup>H NMR** (CDCl<sub>3</sub>, 600 MHz): δ 8.55 (d, *J* = 78.0 Hz, 1H), 8.08 (ddd, *J* = 22.2, 8.6, 1.8 Hz, 2H), 7.99 (d, *J* = 7.1 Hz, 1H), 7.95 – 7.85 (m, 4H), 7.82 (d, *J* = 7.1 Hz, 1H), 7.60 – 7.46 (m, 5H), 7.18 (s, 1H), 6.49 (s, 1H), 2.73 (t, *J* = 6.1 Hz, 2H), 2.67 (t, 2H), 2.24 (dt, *J* = 6.3 Hz, 2H).

**<sup>13</sup>C NMR** (CDCl<sub>3</sub>, 151 MHz): δ 195.5, 187.8, 160.7, 155.6, 138.3, 136.1, 135.1, 134.3, 133.9, 133.3, 132.9, 129.5, 129.5, 128.7, 128.6, 128.5, 127.9, 127.9, 127.7, 127.4, 126.7, 126.6, 125.8, 124.6, 122.2, 97.8, 96.2, 37.4, 24.3, 21.5.

**HRMS** (ESI) *m/z*: [M+Na]<sup>+</sup> calcd for C<sub>31</sub>H<sub>22</sub>O<sub>3</sub>Na<sup>+</sup>, 465.1461; found 465.1454.

**IR** (neat) *v* (cm<sup>-1</sup>): 3060, 2940, 1682, 1622, 1562, 1511, 1274, 1179, 1122.

**(Z)-1-(2-oxo-2-(thiophen-2-yl)ethylidene)-3-(thiophen-2-yl)-7,8-dihydro-1H-isochromen-5(6H)-one (6w)**

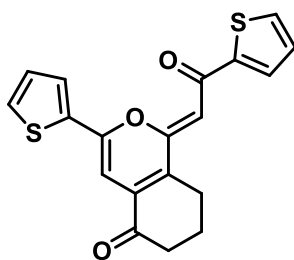

145 mg (82% yield) red solid, purified by flash column chromatography (SiO<sub>2</sub>, Ethyl acetate: n-hexane, 1:6). R<sub>f</sub> = 0.25.

**m.p.** = 230.2-231.0 °C

**<sup>1</sup>H NMR** (CDCl<sub>3</sub>, 600 MHz): δ 7.96 (dd, *J* = 3.7, 1.2 Hz, 1H), 7.68 (dd, *J* = 3.7, 1.1 Hz, 1H), 7.56 (dd, *J* = 4.9, 1.1 Hz, 1H), 7.41 (dd, *J* = 5.0, 1.2 Hz, 1H), 7.12 (ddd, *J* = 5.0, 3.7, 2.9 Hz, 2H), 6.81 (s, 1H), 6.26 (s, 1H), 2.67 – 2.61 (m, 4H), 2.20 (dt, *J* = 12.3, 6.2 Hz, 2H).

**<sup>13</sup>C NMR** (CDCl<sub>3</sub>, 151 MHz): δ 195.2, 179.1, 160.3, 151.6, 148.1, 135.3, 135.1, 133.9, 132.0, 129.3, 128.5, 128.4, 128.2, 128.0, 96.7, 95.1, 37.4, 24.1, 21.5.

**HRMS** (ESI) *m/z*: [M+Na]<sup>+</sup> calcd for C<sub>19</sub>H<sub>16</sub>O<sub>3</sub>S<sub>2</sub>Na<sup>+</sup>, 377.0276; found 377.0276.

**IR** (neat) *v* (cm<sup>-1</sup>): 3106, 2927, 1684, 1608, 1563, 1507, 1162, 1041.

**(Z)-3-cyclopropyl-1-(2-cyclopropyl-2-oxoethylidene)-7,8-dihydro-1H-isochromen-5(6H)-one (6x)**

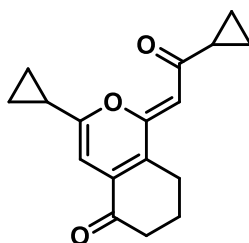

103 mg (76% yield) orange solid, purified by flash column chromatography (SiO<sub>2</sub>, Ethyl acetate: n-hexane, 1:15). R<sub>f</sub> = 0.25.

**m.p.** = 95.7-96.3 °C

**<sup>1</sup>H NMR** (CDCl<sub>3</sub>, 600 MHz): δ 6.26 (s, 1H), 5.62 (s, 1H), 2.54 (t, *J* = 6.3 Hz, 2H), 2.45 (t, *J* = 6.1 Hz, 2H), 2.10 (tt, *J* = 7.0, 5.2 Hz, 3H), 1.72 (tt, *J* = 8.3, 5.0 Hz, 1H), 1.19 – 1.15 (m, 2H), 1.09 – 1.05 (m, 2H), 0.92 – 0.88 (m, 2H), 0.83 (m, 2H).

**<sup>13</sup>C NMR** (CDCl<sub>3</sub>, 151 MHz): δ 196.5, 195.5, 160.8, 158.9, 134.1, 133.3, 101.6, 95.2, 37.4, 24.0, 21.8, 21.6, 14.1, 10.7, 7.3.

**HRMS** (ESI) *m/z*: [M+Na]<sup>+</sup> calcd for C<sub>17</sub>H<sub>18</sub>O<sub>3</sub>Na<sup>+</sup>, 293.1148; found 293.1143.

**IR** (neat) *v* (cm<sup>-1</sup>): 3087, 3006, 2927, 1678, 1637, 1570, 1526, 1376, 1098.

**(Z)-3-(4-methoxyphenyl)-1-(2-oxo-2-phenylethylidene)-7,8-dihydro-1H-isochromen-5(6H)-one (6ad)**

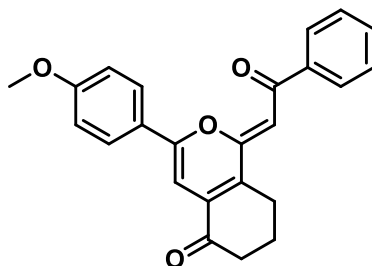

33 mg (15% yield) red solid, purified by flash column chromatography (SiO<sub>2</sub>, Ethyl acetate: n-hexane, 1:3). R<sub>f</sub> = 0.30.

**m.p.** = 196.8-197.4 °C

**<sup>1</sup>H NMR** (CDCl<sub>3</sub>, 600 MHz): δ 8.09 (d, *J* = 8.1 Hz, 2H), 7.96 (d, *J* = 8.3 Hz, 2H), 7.54 – 7.45 (m, 3H), 7.00 (d, *J* = 8.3 Hz, 2H), 6.96 (s, 1H), 6.34 (s, 1H), 3.86 (s, 3H), 2.65 (dt, *J* = 13.2, 6.6 Hz, 4H), 2.21 (m, 2H).

**<sup>13</sup>C NMR** (CDCl<sub>3</sub>, 151 MHz): δ 195.6, 187.6, 161.6, 161.2, 155.8, 141.1, 134.6, 134.3, 131.6, 128.6, 127.7, 127.2, 124.2, 114.4, 96.9, 94.3, 55.5, 37.5, 24.1, 21.6.

**HRMS** (ESI) *m/z*: [M+Na]<sup>+</sup> calcd for C<sub>24</sub>H<sub>20</sub>O<sub>4</sub>Na<sup>+</sup>, 395.1253; found 395.1248.

**IR** (neat) *v* (cm<sup>-1</sup>): 3053, 2947, 1683, 1627, 1605, 1566, 1507, 1255, 1180.

**(Z)-3-(4-methoxyphenyl)-1-(2-oxo-2-(4-(trifluoromethyl)phenyl)ethylidene)-7,8-dihydro-1H-isochromen-5(6H)-one (6du)**

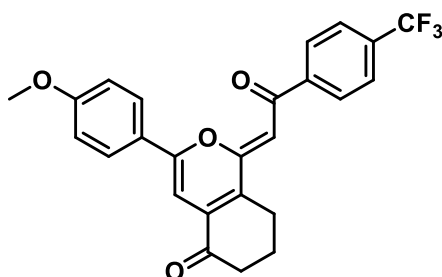

33 mg (15% yield) red solid, purified by flash column chromatography (SiO<sub>2</sub>, Ethyl acetate: n-hexane, 1:6). R<sub>f</sub> = 0.35.

**m.p.** = 181.0-181.3 °C

**<sup>1</sup>H NMR** (CDCl<sub>3</sub>, 600 MHz): δ 8.05 (dd, *J* = 15.5, 8.5 Hz, 4H), 7.72 (d, *J* = 8.2 Hz, 2H), 7.00 (d, *J* = 9.2 Hz, 3H), 6.30 (s, 1H), 3.86 (s, 3H), 2.70 – 2.63 (m, 4H), 2.26 – 2.20 (m, 2H).

$^{13}\text{C}$  NMR ( $\text{CDCl}_3$ , 151 MHz):  $\delta$  195.4, 186.1, 162.1, 161.8, 156.1, 144.1, 134.8, 134.1, 133.0 (q,  $J_{\text{FC}} = 32.2$  Hz), 127.9, 127.2, 125.6 (q,  $J_{\text{FC}} = 3.6$  Hz), 124.0, 123.9 (q,  $J_{\text{FC}} = 271.8$  Hz), 114.5, 96.3, 94.8, 55.5, 37.5, 24.1, 21.5.

$^{19}\text{F}$  NMR ( $\text{CDCl}_3$ , 565 MHz):  $\delta$  -62.67.

HRMS (ESI)  $m/z$ :  $[\text{M}+\text{Na}]^+$  calcd for  $\text{C}_{25}\text{H}_{19}\text{F}_3\text{O}_4\text{Na}^+$ , 463.1127; found 463.1119.

IR (neat)  $\nu$  ( $\text{cm}^{-1}$ ): 3067, 2933, 1686, 1631, 1598, 1569, 1500, 1318, 1252, 1164, 1112, 1063.

### 3. Mechanistic Studies

#### 3.1 Control experiments

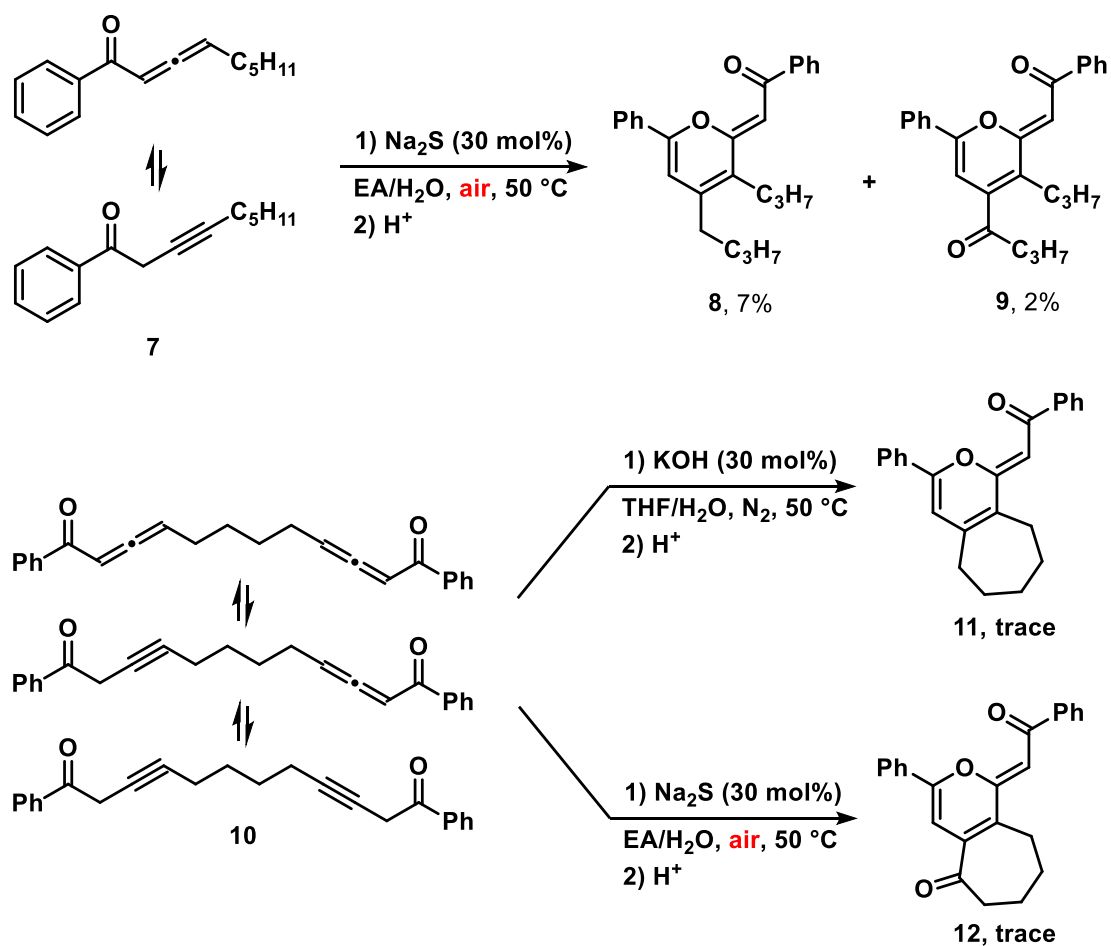

Scheme S1 Reactions of other Allenones / Alkynones.

### 3.2 Deuterium labelling experiments

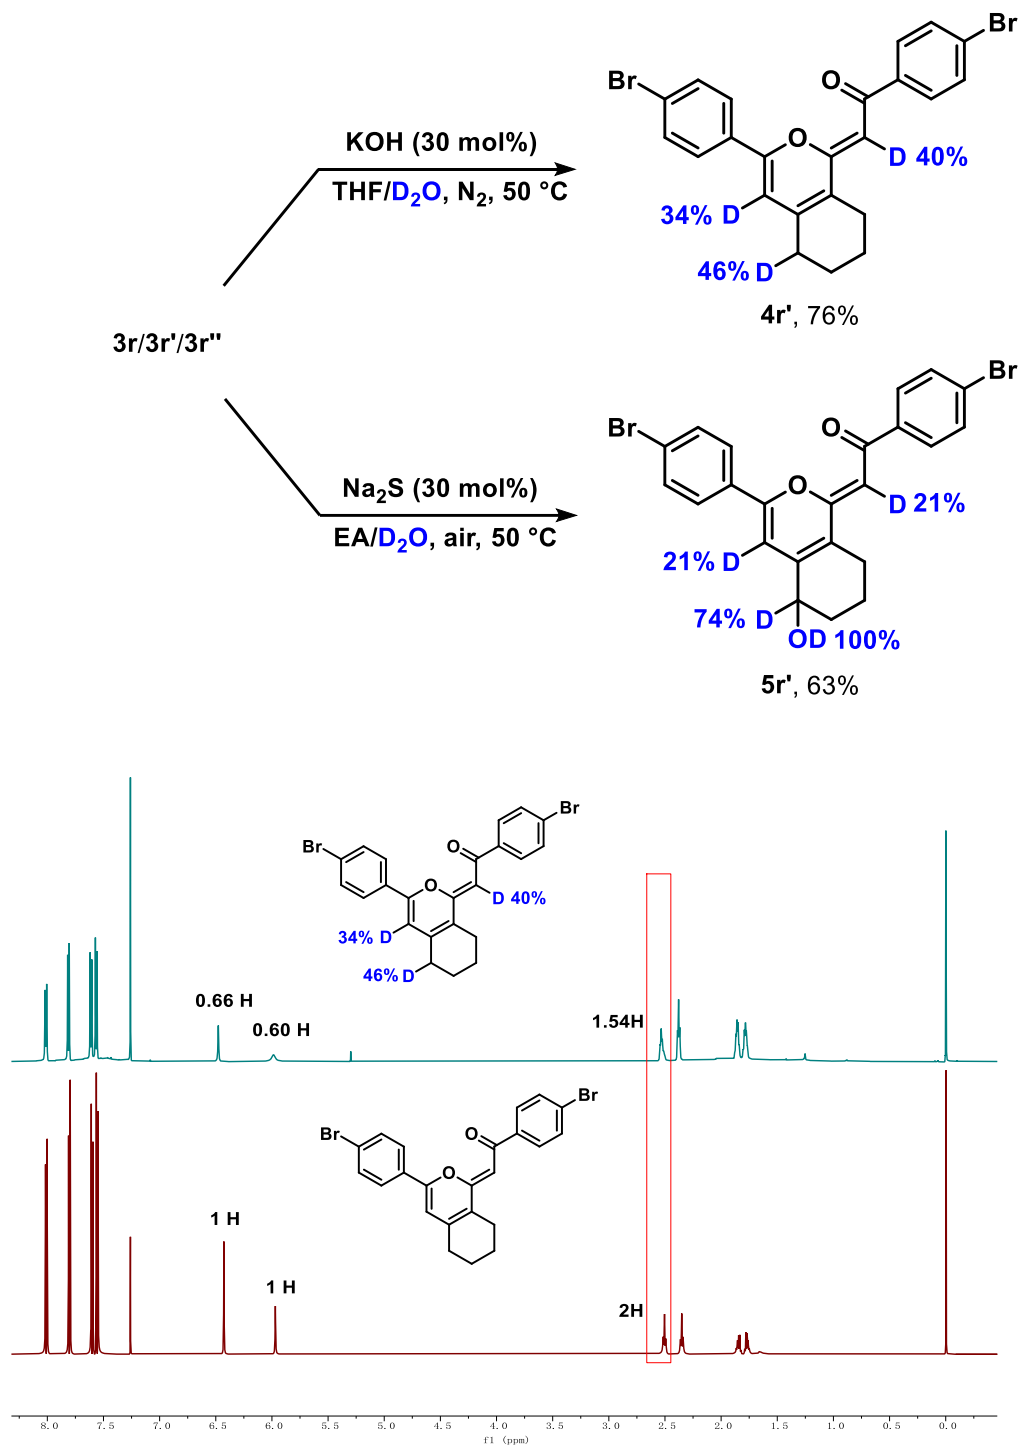

**Figure S1** <sup>1</sup>H NMR comparison of **4r'** and **4r**

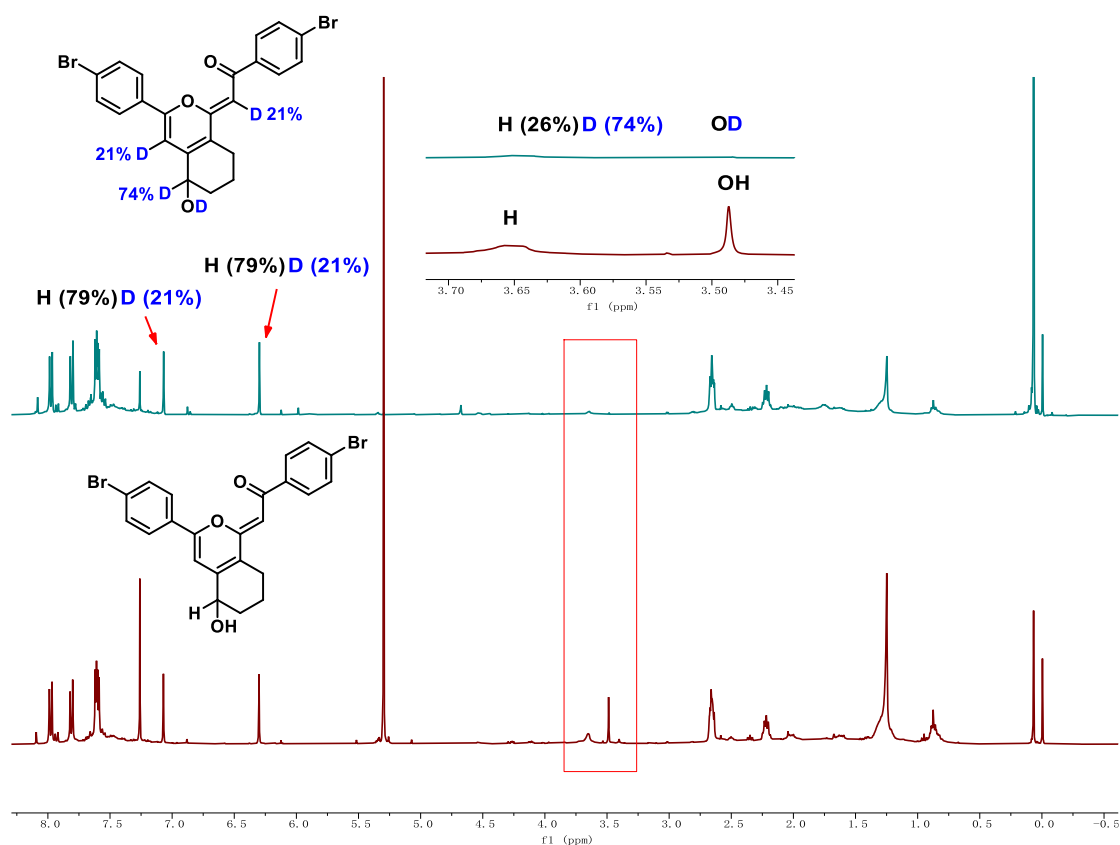

Figure S2  $^1\text{H}$  NMR comparison of **5r'** and **5r**

### 3.3 Oxygen-18 labelling experiments

Oxygen isotope labelling experiments were demonstrated to identify the source of oxygen in oxidation products. Dissolved the freshly prepared **3a/3a'/3a''** (328 mg, 1 mmol) in dry EA (5 mL), a solution of  $\text{Na}_2\text{S}$  (23 mg, 0.3 mmol) in  $\text{H}_2^{18}\text{O}$  (1 mL) was added. Upon completion of the reaction, a small amount of the reaction liquid was taken for testing by HRMS, but no  $^{18}\text{O}$  labelled products were detected.

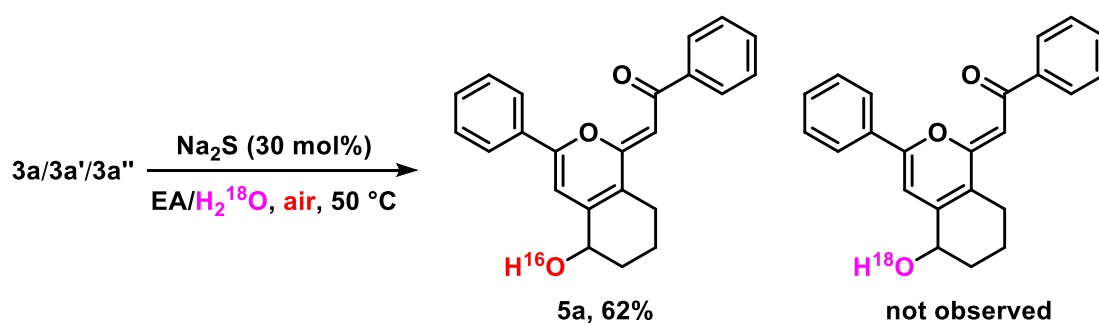

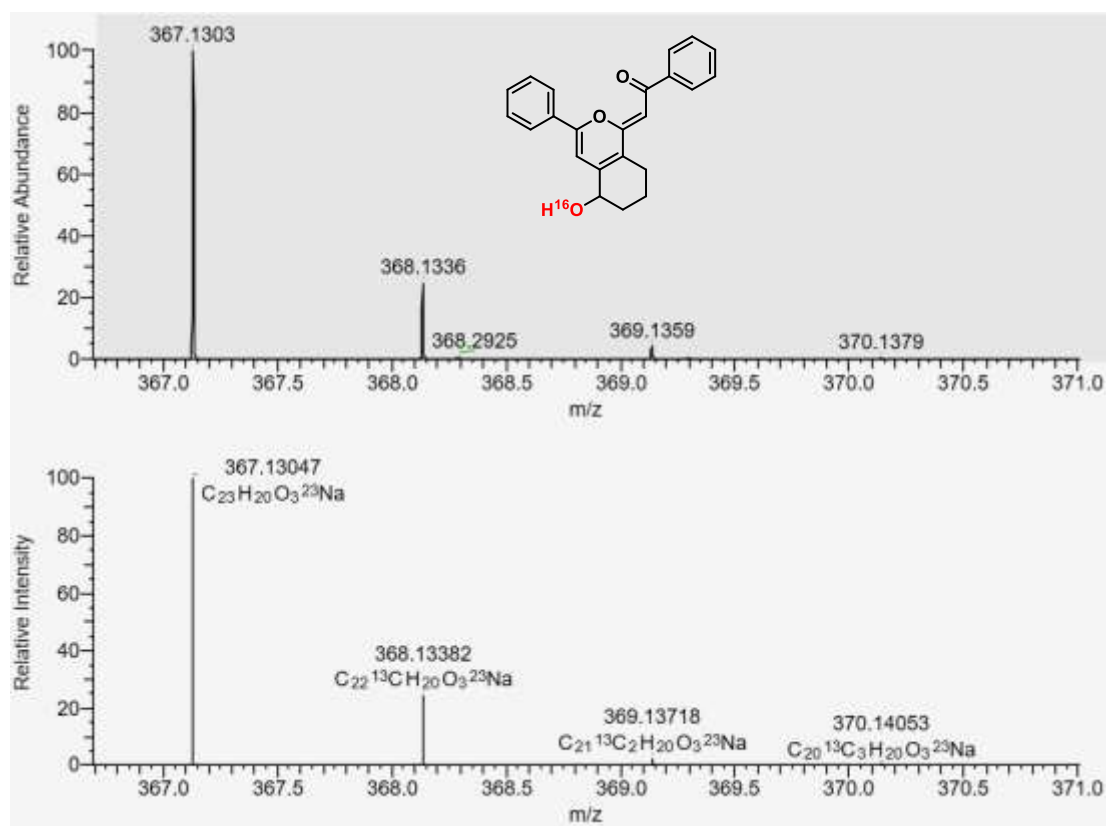

Figure S3 Mass spectra of **5a**

### 3.4 NMR monitoring experiments

To elucidate the course of reactant transformation during the reaction, we conducted NMR tracking experiments. It was observed that as the reaction progressed, the ratio of allenones to alkynones in the starting material continuously increased, indicating that alkynes are converted into allene intermediates during the reaction process.

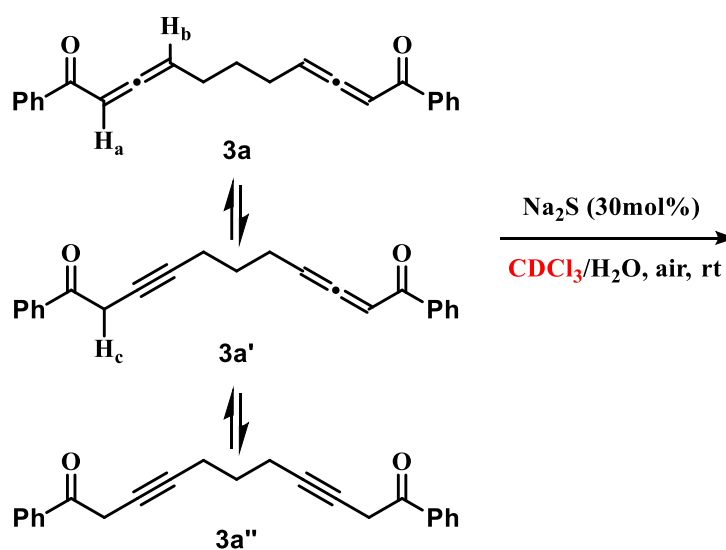

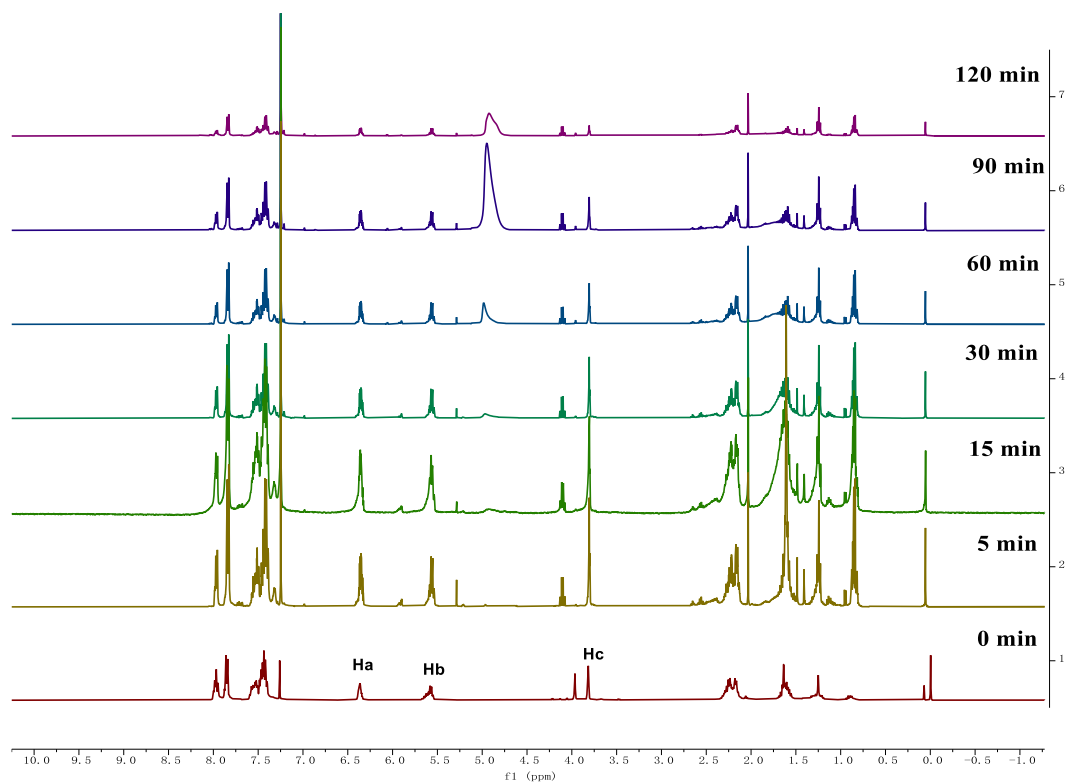

**Figure S4**  $^1\text{H}$  NMR monitoring in  $\text{CDCl}_3$

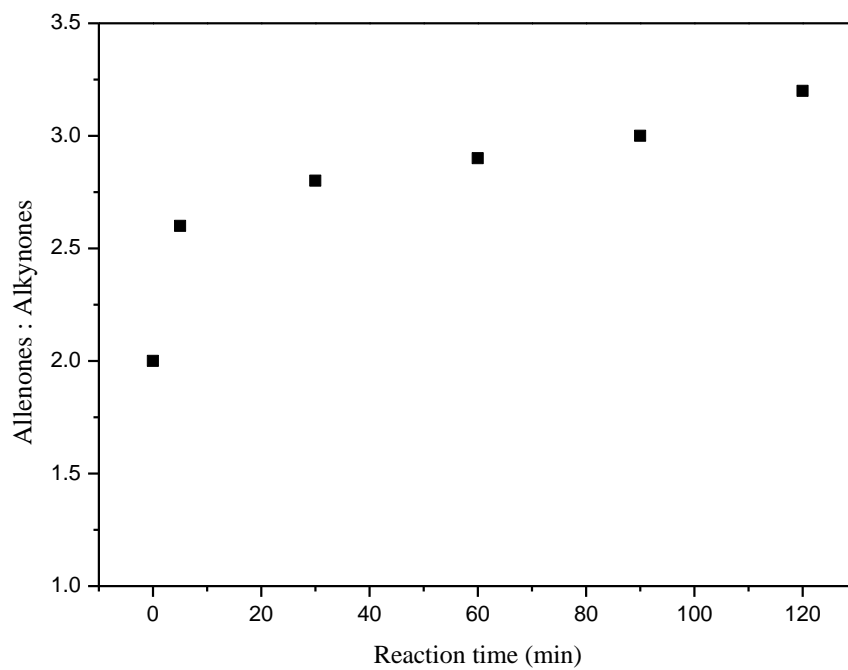

**Figure S5** The ratio of allenones to alkynes during the reaction process



### 3.5 Mass spectra of T1 and T2

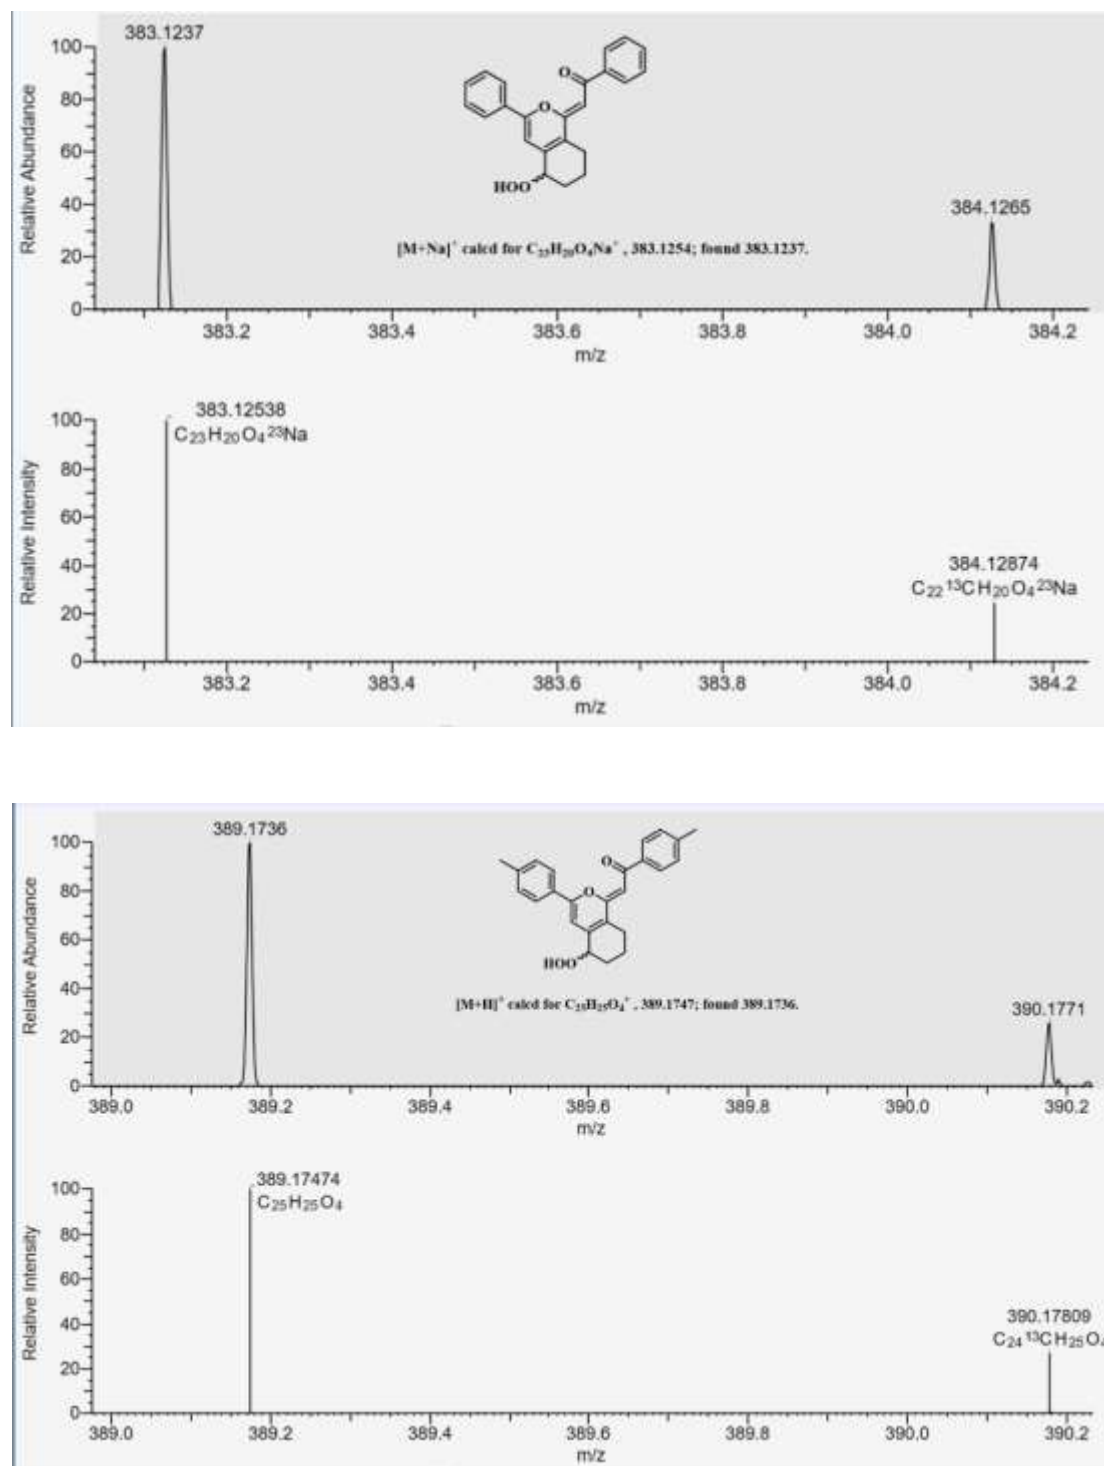

Figure S6 Mass spectra of T1

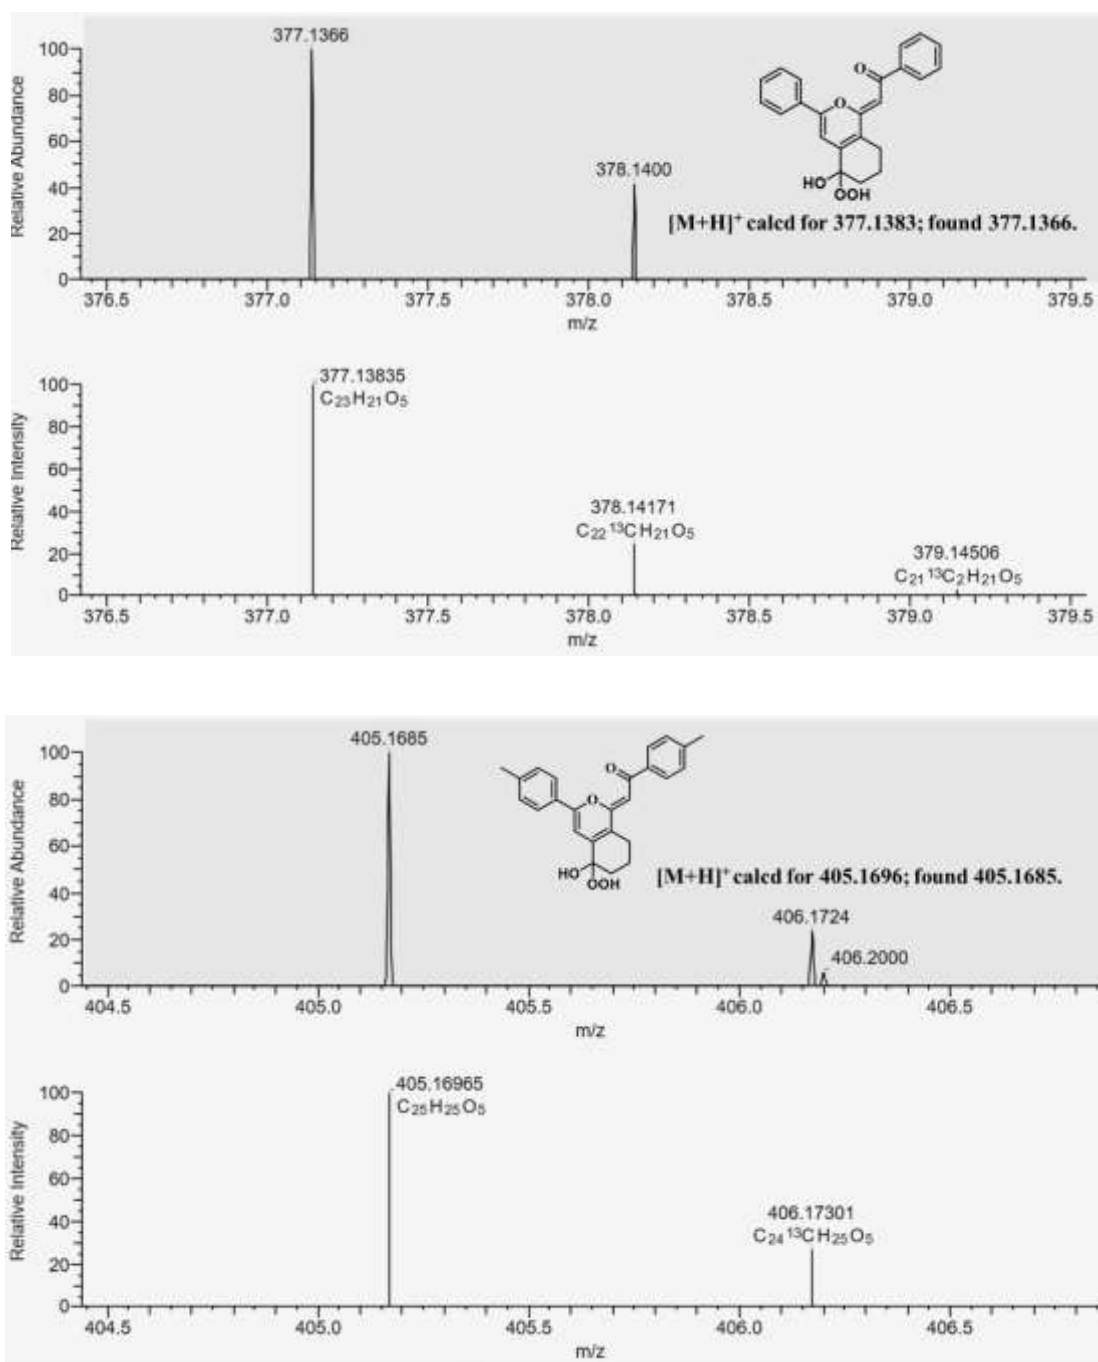

Figure S7 Mass spectra of T2

#### 4. Single Crystal X-Ray Crystallography

Figure S8 Plot (50% probability thermal ellipsoids) of the molecular structure of 4s.

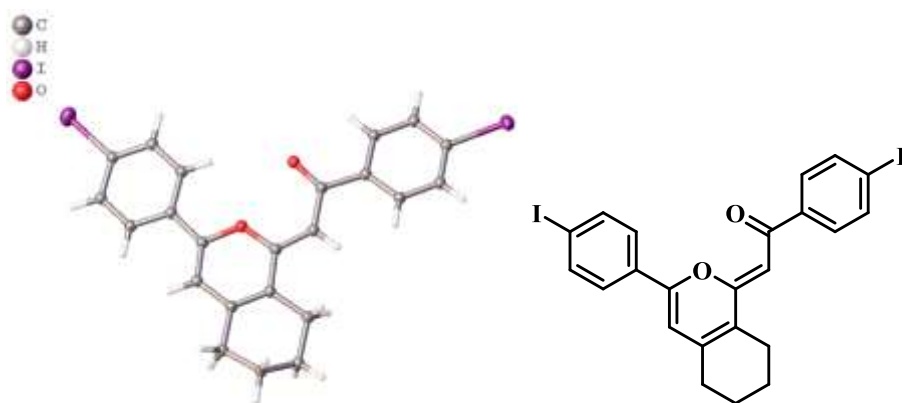

**Sample Preparation for Crystal:** The compound **4s** (15mg) was dissolved in 10 mL mixed solution (PE : EA : DCM= 5:3:2) in a 15 mL sample vial and kept still at room temperature. The orange crystals were observed after one week. The single crystals were then submitted to X-ray diffraction analysis.

**Table S3 Crystal data and structure refinement for mo\_zjb\_285\_a\_0m.**

|                                             |                                                               |
|---------------------------------------------|---------------------------------------------------------------|
| Identification code                         | mo_zjb_285_a_0m                                               |
| Empirical formula                           | C <sub>23</sub> H <sub>18</sub> I <sub>2</sub> O <sub>2</sub> |
| Formula weight                              | 580.17                                                        |
| Temperature/K                               | 150(2)                                                        |
| Crystal system                              | monoclinic                                                    |
| Space group                                 | P2/n                                                          |
| a/Å                                         | 16.5721(19)                                                   |
| b/Å                                         | 8.3586(8)                                                     |
| c/Å                                         | 17.0294(19)                                                   |
| $\alpha$ /°                                 | 90                                                            |
| $\beta$ /°                                  | 92.605(4)                                                     |
| $\gamma$ /°                                 | 90                                                            |
| Volume/Å <sup>3</sup>                       | 2356.5(4)                                                     |
| Z                                           | 4                                                             |
| $\rho_{\text{calc}}$ /cm <sup>3</sup>       | 1.635                                                         |
| $\mu$ /mm <sup>-1</sup>                     | 2.682                                                         |
| F(000)                                      | 1112.0                                                        |
| Crystal size/mm <sup>3</sup>                | 0.300 × 0.300 × 0.200                                         |
| Radiation                                   | MoK $\alpha$ ( $\lambda$ = 0.71073)                           |
| 2 $\theta$ range for data collection/°      | 3.354 to 56.596                                               |
| Index ranges                                | -22 ≤ h ≤ 22, -11 ≤ k ≤ 11, -22 ≤ l ≤ 22                      |
| Reflections collected                       | 53896                                                         |
| Independent reflections                     | 5851 [R <sub>int</sub> = 0.0578, R <sub>sigma</sub> = 0.0332] |
| Data/restraints/parameters                  | 5851/0/244                                                    |
| Goodness-of-fit on F <sup>2</sup>           | 1.068                                                         |
| Final R indexes [I ≥ 2 $\sigma$ (I)]        | R <sub>1</sub> = 0.0524, wR <sub>2</sub> = 0.1512             |
| Final R indexes [all data]                  | R <sub>1</sub> = 0.0712, wR <sub>2</sub> = 0.1651             |
| Largest diff. peak/hole / e Å <sup>-3</sup> | 1.78/-0.84                                                    |

**Table S4 Fractional Atomic Coordinates (×10<sup>4</sup>) and Equivalent Isotropic Displacement Parameters (Å<sup>2</sup>×10<sup>3</sup>) for mo\_zjb\_285\_a\_0m. U<sub>eq</sub> is defined as 1/3 of of the trace of the orthogonalised U<sub>ij</sub> tensor.**

| Atom | x          | y          | z          | U(eq)     |
|------|------------|------------|------------|-----------|
| I1   | 5131.0(3)  | 2562.4(6)  | 9623.5(3)  | 82.78(19) |
| I2   | 1443.2(3)  | 12098.9(5) | 3535.0(2)  | 66.33(16) |
| O1   | 5515.7(18) | 6107(4)    | 5951.7(19) | 45.0(7)   |
| O2   | 4139(2)    | 7792(6)    | 6025(2)    | 66.3(11)  |
| C1   | 5463(3)    | 3477(7)    | 8538(3)    | 57.6(13)  |
| C2   | 6146(4)    | 2852(7)    | 8196(4)    | 66.8(16)  |
| C3   | 6344(3)    | 3386(7)    | 7461(4)    | 59.6(13)  |
| C4   | 5894(3)    | 4603(6)    | 7078(3)    | 47.4(11)  |
| C5   | 6113(3)    | 5159(6)    | 6298(3)    | 47.5(11)  |
| C6   | 5562(3)    | 6657(6)    | 5207(3)    | 44.7(10)  |
| C7   | 4934(3)    | 7589(6)    | 4915(3)    | 43.4(10)  |
| C8   | 4239(3)    | 8094(6)    | 5323(3)    | 46.5(10)  |
| C9   | 3605(3)    | 9037(6)    | 4871(3)    | 42.3(9)   |
| C10  | 3703(3)    | 9691(7)    | 4130(3)    | 52.2(12)  |
| C11  | 3081(3)    | 10550(7)   | 3748(3)    | 56.4(12)  |
| C12  | 2370(3)    | 10764(6)   | 4104(3)    | 49.0(11)  |
| C13  | 5017(3)    | 4661(7)    | 8167(3)    | 58.4(13)  |
| C14  | 5228(3)    | 5224(6)    | 7439(3)    | 47.5(11)  |
| C15  | 6780(3)    | 4868(7)    | 5906(3)    | 55.1(13)  |
| C16  | 6862(3)    | 5417(6)    | 5126(3)    | 52.0(12)  |
| C17  | 6254(3)    | 6259(6)    | 4773(3)    | 45.8(10)  |
| C18  | 6271(3)    | 6805(8)    | 3933(3)    | 63.0(15)  |
| C19  | 6931(5)    | 5992(15)   | 3491(5)    | 114(3)    |
| C20  | 7684(5)    | 5863(15)   | 3955(6)    | 120(3)    |
| C21  | 7628(3)    | 5000(8)    | 4725(4)    | 68.9(17)  |
| C22  | 2252(3)    | 10159(7)   | 4840(3)    | 53.8(12)  |
| C23  | 2876(3)    | 9316(7)    | 5219(3)    | 50.0(11)  |

**Table S5 Anisotropic Displacement Parameters ( $\text{\AA}^2 \times 10^3$ ) for mo\_zjb\_285\_a\_0m. The Anisotropic displacement factor exponent takes the form:  $-2\pi^2[h^2a^{*2}U_{11}+2hka^*b^*U_{12}+\dots]$ .**

| Atom | $U_{11}$ | $U_{22}$ | $U_{33}$ | $U_{23}$  | $U_{13}$  | $U_{12}$  |
|------|----------|----------|----------|-----------|-----------|-----------|
| I1   | 86.8(4)  | 89.9(4)  | 71.6(3)  | 19.6(2)   | 2.9(2)    | -11.6(2)  |
| I2   | 69.0(3)  | 64.4(3)  | 64.4(3)  | -5.95(17) | -9.87(18) | 16.90(18) |
| O1   | 35.9(15) | 53.8(19) | 45.5(17) | -6.5(14)  | 4.1(13)   | 1.3(13)   |
| O2   | 55(2)    | 100(3)   | 45(2)    | 5.5(19)   | 7.8(17)   | 24(2)     |
| C1   | 60(3)    | 55(3)    | 56(3)    | 8(2)      | -10(2)    | -10(2)    |
| C2   | 62(3)    | 56(3)    | 82(4)    | 11(3)     | -1(3)     | 2(3)      |
| C3   | 46(3)    | 62(3)    | 71(4)    | -7(3)     | 4(2)      | 0(2)      |
| C4   | 34(2)    | 50(3)    | 58(3)    | -9(2)     | -6(2)     | -4.2(18)  |
| C5   | 31(2)    | 51(3)    | 60(3)    | -13(2)    | -1(2)     | 0.3(18)   |
| C6   | 39(2)    | 47(2)    | 48(3)    | -10(2)    | 3.5(19)   | -7.1(18)  |
| C7   | 36(2)    | 51(3)    | 44(2)    | -7.2(19)  | 7.8(19)   | -4.1(18)  |
| C8   | 43(2)    | 53(3)    | 44(2)    | -6(2)     | 3.5(19)   | 1(2)      |
| C9   | 44(2)    | 44(2)    | 39(2)    | -6.3(18)  | 5.8(18)   | -2.6(18)  |
| C10  | 47(3)    | 61(3)    | 48(3)    | 1(2)      | 7(2)      | 1(2)      |
| C11  | 64(3)    | 57(3)    | 48(3)    | 2(2)      | 3(2)      | 6(2)      |
| C12  | 57(3)    | 40(2)    | 49(3)    | -6(2)     | -8(2)     | 2(2)      |
| C13  | 44(3)    | 72(4)    | 59(3)    | -3(3)     | 6(2)      | -6(2)     |
| C14  | 36(2)    | 57(3)    | 49(3)    | -2(2)     | -1.4(19)  | 1.1(19)   |

|     |       |         |        |        |          |          |
|-----|-------|---------|--------|--------|----------|----------|
| C15 | 34(2) | 62(3)   | 70(3)  | -12(3) | -1(2)    | 0(2)     |
| C16 | 35(2) | 58(3)   | 64(3)  | -20(2) | 9(2)     | -5(2)    |
| C17 | 36(2) | 53(3)   | 49(3)  | -14(2) | 10.4(19) | -9.6(19) |
| C18 | 46(3) | 84(4)   | 61(3)  | -12(3) | 19(2)    | -9(3)    |
| C19 | 70(5) | 196(11) | 79(5)  | -25(6) | 33(4)    | 10(6)    |
| C20 | 81(5) | 168(10) | 116(7) | 2(7)   | 54(5)    | 31(6)    |
| C21 | 44(3) | 77(4)   | 87(4)  | -25(3) | 20(3)    | 3(3)     |
| C22 | 46(3) | 61(3)   | 55(3)  | -2(2)  | 7(2)     | 6(2)     |
| C23 | 41(2) | 62(3)   | 47(3)  | 1(2)   | 8(2)     | 5(2)     |

**Table S6 Bond Lengths for mo\_zjb\_285\_a\_0m.**

| Atom | Atom | Length/Å | Atom | Atom | Length/Å  |
|------|------|----------|------|------|-----------|
| I1   | C1   | 2.096(6) | C8   | C9   | 1.497(7)  |
| I2   | C12  | 2.099(5) | C9   | C23  | 1.390(6)  |
| O1   | C6   | 1.354(6) | C9   | C10  | 1.392(7)  |
| O1   | C5   | 1.379(6) | C10  | C11  | 1.394(7)  |
| O2   | C8   | 1.241(6) | C11  | C12  | 1.361(8)  |
| C1   | C13  | 1.372(8) | C12  | C22  | 1.373(7)  |
| C1   | C2   | 1.399(9) | C13  | C14  | 1.385(7)  |
| C2   | C3   | 1.383(9) | C15  | C16  | 1.418(8)  |
| C3   | C4   | 1.405(8) | C16  | C17  | 1.349(7)  |
| C4   | C14  | 1.389(7) | C16  | C21  | 1.508(7)  |
| C4   | C5   | 1.468(7) | C17  | C18  | 1.503(8)  |
| C5   | C15  | 1.339(7) | C18  | C19  | 1.515(9)  |
| C6   | C7   | 1.376(7) | C19  | C20  | 1.449(12) |
| C6   | C17  | 1.431(6) | C20  | C21  | 1.504(11) |
| C7   | C8   | 1.435(7) | C22  | C23  | 1.385(7)  |

**Table S7 Bond Angles for mo\_zjb\_285\_a\_0m.**

| Atom | Atom | Atom | Angle/°  | Atom | Atom | Atom | Angle/°  |
|------|------|------|----------|------|------|------|----------|
| C6   | O1   | C5   | 121.6(4) | C10  | C9   | C8   | 124.3(4) |
| C13  | C1   | C2   | 120.4(5) | C9   | C10  | C11  | 120.7(5) |
| C13  | C1   | I1   | 120.9(5) | C12  | C11  | C10  | 119.8(5) |
| C2   | C1   | I1   | 118.8(4) | C11  | C12  | C22  | 121.3(5) |
| C3   | C2   | C1   | 119.2(6) | C11  | C12  | I2   | 119.6(4) |
| C2   | C3   | C4   | 120.7(5) | C22  | C12  | I2   | 119.1(4) |
| C14  | C4   | C3   | 118.8(5) | C1   | C13  | C14  | 120.4(5) |
| C14  | C4   | C5   | 121.1(5) | C13  | C14  | C4   | 120.5(5) |
| C3   | C4   | C5   | 120.1(5) | C5   | C15  | C16  | 121.6(5) |
| C15  | C5   | O1   | 119.0(5) | C17  | C16  | C15  | 119.0(4) |
| C15  | C5   | C4   | 129.6(5) | C17  | C16  | C21  | 123.1(5) |
| O1   | C5   | C4   | 111.5(4) | C15  | C16  | C21  | 117.9(5) |
| O1   | C6   | C7   | 117.2(4) | C16  | C17  | C6   | 119.4(5) |
| O1   | C6   | C17  | 119.1(4) | C16  | C17  | C18  | 122.4(4) |
| C7   | C6   | C17  | 123.7(5) | C6   | C17  | C18  | 118.2(5) |
| C6   | C7   | C8   | 127.1(5) | C17  | C18  | C19  | 112.5(6) |
| O2   | C8   | C7   | 123.5(5) | C20  | C19  | C18  | 112.7(7) |
| O2   | C8   | C9   | 118.7(4) | C19  | C20  | C21  | 115.2(8) |
| C7   | C8   | C9   | 117.8(4) | C20  | C21  | C16  | 111.7(6) |
| C23  | C9   | C10  | 117.5(5) | C12  | C22  | C23  | 118.7(5) |

C23 C9 C8 118.2(4)

C22 C23 C9 122.0(5)

**Table S8 Torsion Angles for mo\_zjb\_285\_a\_0m.**

| A   | B   | C   | D   | Angle/°   | A   | B   | C   | D   | Angle/°   |
|-----|-----|-----|-----|-----------|-----|-----|-----|-----|-----------|
| C13 | C1  | C2  | C3  | -3.1(9)   | C1  | C13 | C14 | C4  | -0.3(8)   |
| I1  | C1  | C2  | C3  | 176.5(4)  | C3  | C4  | C14 | C13 | 0.6(7)    |
| C1  | C2  | C3  | C4  | 3.4(9)    | C5  | C4  | C14 | C13 | 178.5(5)  |
| C2  | C3  | C4  | C14 | -2.1(8)   | O1  | C5  | C15 | C16 | -4.4(8)   |
| C2  | C3  | C4  | C5  | 179.9(5)  | C4  | C5  | C15 | C16 | 175.2(5)  |
| C6  | O1  | C5  | C15 | 4.6(7)    | C5  | C15 | C16 | C17 | 0.3(8)    |
| C6  | O1  | C5  | C4  | -175.1(4) | C5  | C15 | C16 | C21 | -178.7(5) |
| C14 | C4  | C5  | C15 | 170.2(5)  | C15 | C16 | C17 | C6  | 3.6(7)    |
| C3  | C4  | C5  | C15 | -11.9(8)  | C21 | C16 | C17 | C6  | -177.5(5) |
| C14 | C4  | C5  | O1  | -10.2(6)  | C15 | C16 | C17 | C18 | -176.5(5) |
| C3  | C4  | C5  | O1  | 167.8(4)  | C21 | C16 | C17 | C18 | 2.5(8)    |
| C5  | O1  | C6  | C7  | 179.8(4)  | O1  | C6  | C17 | C16 | -3.4(7)   |
| C5  | O1  | C6  | C17 | -0.7(6)   | C7  | C6  | C17 | C16 | 176.1(5)  |
| O1  | C6  | C7  | C8  | 2.3(7)    | O1  | C6  | C17 | C18 | 176.6(4)  |
| C17 | C6  | C7  | C8  | -177.2(5) | C7  | C6  | C17 | C18 | -3.9(7)   |
| C6  | C7  | C8  | O2  | 3.3(8)    | C16 | C17 | C18 | C19 | 13.3(8)   |
| C6  | C7  | C8  | C9  | -176.7(4) | C6  | C17 | C18 | C19 | -166.7(6) |
| O2  | C8  | C9  | C23 | -9.9(7)   | C17 | C18 | C19 | C20 | -41.9(11) |
| C7  | C8  | C9  | C23 | 170.1(5)  | C18 | C19 | C20 | C21 | 56.9(13)  |
| O2  | C8  | C9  | C10 | 168.3(5)  | C19 | C20 | C21 | C16 | -39.5(11) |
| C7  | C8  | C9  | C10 | -11.6(7)  | C17 | C16 | C21 | C20 | 9.7(9)    |
| C23 | C9  | C10 | C11 | -1.9(8)   | C15 | C16 | C21 | C20 | -171.4(7) |
| C8  | C9  | C10 | C11 | 179.8(5)  | C11 | C12 | C22 | C23 | 0.0(8)    |
| C9  | C10 | C11 | C12 | 0.5(8)    | I2  | C12 | C22 | C23 | -178.3(4) |
| C10 | C11 | C12 | C22 | 0.5(8)    | C12 | C22 | C23 | C9  | -1.5(8)   |
| C10 | C11 | C12 | I2  | 178.8(4)  | C10 | C9  | C23 | C22 | 2.4(8)    |
| C2  | C1  | C13 | C14 | 1.6(8)    | C8  | C9  | C23 | C22 | -179.2(5) |
| I1  | C1  | C13 | C14 | -178.1(4) |     |     |     |     |           |

**Table S9 Hydrogen Atom Coordinates ( $\text{\AA} \times 10^4$ ) and Isotropic Displacement Parameters ( $\text{\AA}^2 \times 10^3$ ) for mo\_zjb\_285\_a\_0m.**

| Atom | x       | y        | z       | U(eq) |
|------|---------|----------|---------|-------|
| H2   | 6469.86 | 2069.77  | 8464.51 | 80    |
| H3   | 6790.62 | 2925.9   | 7212.16 | 72    |
| H7   | 4962.98 | 7935.51  | 4385.94 | 52    |
| H10  | 4200.36 | 9549.83  | 3881.75 | 63    |
| H11  | 3151.98 | 10985.23 | 3240.77 | 68    |
| H13  | 4562.28 | 5097.77  | 8410.12 | 70    |
| H14  | 4913.72 | 6039.86  | 7185.15 | 57    |
| H15  | 7208.86 | 4278.63  | 6157.47 | 66    |
| H18A | 6356.55 | 7976.69  | 3921.91 | 76    |
| H18B | 5742.07 | 6575.82  | 3663.55 | 76    |
| H19A | 6747.49 | 4907.88  | 3332.27 | 137   |
| H19B | 7026.08 | 6607.08  | 3007.18 | 137   |
| H20A | 7892.89 | 6954.62  | 4061.57 | 144   |
| H20B | 8081.82 | 5301.07  | 3637.82 | 144   |

|              |          |         |    |
|--------------|----------|---------|----|
| H21A 8099.7  | 5285.45  | 5074.4  | 83 |
| H21B 7643.93 | 3831.39  | 4631.83 | 83 |
| H22 1754.1   | 10314.87 | 5083.71 | 65 |
| H23 2802.11  | 8917.52  | 5733.65 | 60 |

### Experimental

Single crystals of C<sub>23</sub>H<sub>18</sub>I<sub>2</sub>O<sub>2</sub> [**mo\_zjb\_285\_a\_0m**] were []. A suitable crystal was selected and [] on a diffractometer. The crystal was kept at 150(2) K during data collection. Using Olex2 [1], the structure was solved with the Unknown [2] structure solution program using Unknown and refined with the Unknown [3] refinement package using Unknown minimisation.

1. Dolomanov, O.V., Bourhis, L.J., Gildea, R.J., Howard, J.A.K. & Puschmann, H. (2009), J. Appl. Cryst. 42, 339-341.
- 2.
- 3.

### Crystal structure determination of [**mo\_zjb\_285\_a\_0m**]

**Crystal Data** for C<sub>23</sub>H<sub>18</sub>I<sub>2</sub>O<sub>2</sub> (*M* = 580.17 g/mol): monoclinic, space group P2/n (no. 13), *a* = 16.5721(19) Å, *b* = 8.3586(8) Å, *c* = 17.0294(19) Å,  $\beta$  = 92.605(4)°, *V* = 2356.5(4) Å<sup>3</sup>, *Z* = 4, *T* = 150(2) K,  $\mu$ (MoK $\alpha$ ) = 2.682 mm<sup>-1</sup>, *D*<sub>calc</sub> = 1.635 g/cm<sup>3</sup>, 53896 reflections measured (3.354° ≤ 2 $\Theta$  ≤ 56.596°), 5851 unique (*R*<sub>int</sub> = 0.0578, *R*<sub>sigma</sub> = 0.0332) which were used in all calculations. The final *R*<sub>1</sub> was 0.0524 (*I* > 2 $\sigma$ (*I*)) and *wR*<sub>2</sub> was 0.1651 (all data). **The CCDC deposition number 2328809** contains the supplementary crystallographic data for this paper which can be obtained free of charge at <https://www.ccdc.cam.ac.uk/structures/>

### Refinement model description

Number of restraints - 0, number of constraints - unknown.

Details:

N/A

This report has been created with Olex2, compiled on 2018.05.29 svn.r3508 for OlexSys. Please [let us know](#) if there are any errors or if you would like to have additional features.

**Figure S9** Plot (50% probability thermal ellipsoids) of the molecular structure of **6du**.

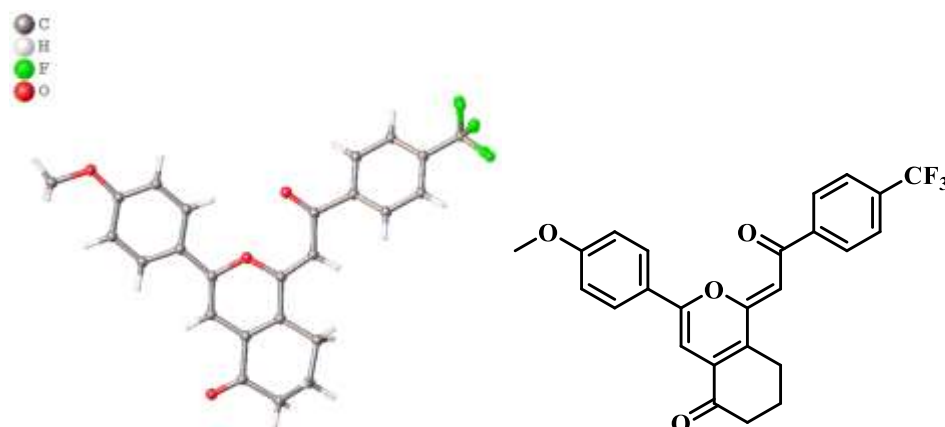

**Sample Preparation for Crystal:** The compound **6du** (10 mg) was dissolved in 10 mL mixed solution (PE:EA:DCM= 5:3:2) in a 15 mL sample vial and kept still at room temperature. The red crystals was observed after three days. The single crystals were then submitted to X-ray diffraction analysis.

**Table S10 Crystal data and structure refinement for 1.**

|                                             |                                                               |
|---------------------------------------------|---------------------------------------------------------------|
| Identification code                         | 1                                                             |
| Empirical formula                           | C <sub>25</sub> H <sub>19</sub> F <sub>3</sub> O <sub>4</sub> |
| Formula weight                              | 440.40                                                        |
| Temperature/K                               | 300                                                           |
| Crystal system                              | triclinic                                                     |
| Space group                                 | P-1                                                           |
| a/Å                                         | 9.6264(17)                                                    |
| b/Å                                         | 10.7417(18)                                                   |
| c/Å                                         | 11.025(2)                                                     |
| α/°                                         | 97.196(6)                                                     |
| β/°                                         | 113.780(6)                                                    |
| γ/°                                         | 92.477(6)                                                     |
| Volume/Å <sup>3</sup>                       | 1029.5(3)                                                     |
| Z                                           | 2                                                             |
| ρ <sub>calc</sub> /cm <sup>3</sup>          | 1.421                                                         |
| μ/mm <sup>-1</sup>                          | 0.113                                                         |
| F(000)                                      | 456.0                                                         |
| Crystal size/mm <sup>3</sup>                | 0.4 × 0.3 × 0.3                                               |
| Radiation                                   | MoKα (λ = 0.71073)                                            |
| 2θ range for data collection/°              | 4.088 to 56.546                                               |
| Index ranges                                | -12 ≤ h ≤ 12, -14 ≤ k ≤ 14, -14 ≤ l ≤ 14                      |
| Reflections collected                       | 38754                                                         |
| Independent reflections                     | 5079 [R <sub>int</sub> = 0.0598, R <sub>sigma</sub> = 0.0375] |
| Data/restraints/parameters                  | 5079/114/318                                                  |
| Goodness-of-fit on F <sup>2</sup>           | 1.070                                                         |
| Final R indexes [I ≥ 2σ (I)]                | R <sub>1</sub> = 0.0815, wR <sub>2</sub> = 0.2446             |
| Final R indexes [all data]                  | R <sub>1</sub> = 0.1031, wR <sub>2</sub> = 0.2684             |
| Largest diff. peak/hole / e Å <sup>-3</sup> | 0.62/-0.38                                                    |

**Table S11 Fractional Atomic Coordinates (×10<sup>4</sup>) and Equivalent Isotropic Displacement Parameters (Å<sup>2</sup>×10<sup>3</sup>) for 1. U<sub>eq</sub> is defined as 1/3 of the trace of the orthogonalised U<sub>ij</sub> tensor.**

| Atom | x          | y          | z          | U(eq)    |
|------|------------|------------|------------|----------|
| O1   | 5448.1(18) | 5009.6(13) | 2140.9(17) | 51.8(4)  |
| C1   | 10544(4)   | 1717(3)    | -227(4)    | 89.0(11) |
| O2   | 6616(3)    | 9180.9(19) | 1193(3)    | 101.5(9) |
| O3   | 4326(3)    | 3125.3(19) | 2936(3)    | 98.0(9)  |
| C2   | -462(5)    | 2146(4)    | 5462(5)    | 100.4(9) |
| C3   | 598(3)     | 2614(3)    | 4912(3)    | 71.5(8)  |
| C4   | 1200(3)    | 3861(3)    | 5281(3)    | 65.6(7)  |
| C5   | 2184(3)    | 4304(2)    | 4764(3)    | 58.3(6)  |
| C6   | 2560(3)    | 3505(2)    | 3877(3)    | 54.5(6)  |
| C7   | 3646(3)    | 3922(2)    | 3296(3)    | 60.8(6)  |
| C8   | 3785(3)    | 5246(2)    | 3182(3)    | 54.7(6)  |
| C9   | 4658(3)    | 5791(2)    | 2639(2)    | 49.4(5)  |
| C10  | 6351(3)    | 5422.8(19) | 1552(2)    | 47.2(5)  |
| C11  | 7145(3)    | 4406.4(19) | 1199(2)    | 48.1(5)  |
| C12  | 6952(3)    | 3194(2)    | 1466(3)    | 52.2(5)  |
| C13  | 7730(3)    | 2246(2)    | 1151(3)    | 57.1(6)  |



|     |          |            |          |           |
|-----|----------|------------|----------|-----------|
| C14 | 8723(3)  | 2493(2)    | 565(3)   | 56.2(6)   |
| O15 | 9431(2)  | 1489.6(17) | 289(2)   | 75.2(6)   |
| C16 | 6445(3)  | 6636(2)    | 1402(3)  | 53.8(6)   |
| C17 | 5663(3)  | 7505(2)    | 1916(3)  | 51.7(5)   |
| C18 | 4819(3)  | 7120(2)    | 2559(2)  | 50.6(5)   |
| C19 | 4042(4)  | 8023(2)    | 3175(3)  | 65.9(7)   |
| C20 | 4658(7)  | 9382(3)    | 3283(5)  | 127.2(19) |
| C21 | 4945(5)  | 9734(3)    | 2219(5)  | 96.0(12)  |
| C22 | 5831(3)  | 8859(2)    | 1738(3)  | 69.1(7)   |
| C23 | 973(4)   | 1807(3)    | 4040(4)  | 80.6(9)   |
| C24 | 1971(4)  | 2251(3)    | 3540(3)  | 70.1(7)   |
| C28 | 8113(3)  | 4622(2)    | 575(3)   | 70.1(8)   |
| C29 | 8896(4)  | 3682(2)    | 265(4)   | 72.2(8)   |
| F1  | 165(7)   | 1301(4)    | 6290(5)  | 123.6(15) |
| F2  | -596(5)  | 3043(4)    | 6443(5)  | 113.5(13) |
| F3  | -1744(7) | 1771(9)    | 4668(7)  | 180(3)    |
| F1A | -95(15)  | 1973(14)   | 6497(12) | 161(3)    |
| F2A | -1886(9) | 2609(7)    | 4834(10) | 107(2)    |
| F3A | -1259(9) | 900(7)     | 4708(11) | 116(2)    |

**Table S12 Anisotropic Displacement Parameters ( $\text{\AA}^2 \times 10^3$ ) for 1. The Anisotropic displacement factor exponent takes the form:  $-2\pi^2[h^2a^{*2}U_{11}+2hka^*b^*U_{12}+\dots]$ .**

| Atom | $U_{11}$ | $U_{22}$ | $U_{33}$  | $U_{23}$ | $U_{13}$ | $U_{12}$ |
|------|----------|----------|-----------|----------|----------|----------|
| O1   | 64.5(10) | 40.9(7)  | 72.1(10)  | 13.3(7)  | 49.0(9)  | 10.1(7)  |
| C1   | 111(2)   | 74.7(18) | 135(3)    | 36.0(19) | 97(2)    | 41.0(17) |
| O2   | 129(2)   | 49.8(11) | 182(3)    | 36.5(13) | 114(2)   | 16.1(11) |
| O3   | 132(2)   | 54.8(11) | 175(2)    | 31.3(13) | 126(2)   | 27.5(12) |
| C2   | 97.4(18) | 104(2)   | 141(2)    | 51.0(17) | 82.1(18) | 8.1(16)  |
| C3   | 63.0(15) | 85.7(19) | 91(2)     | 46.4(16) | 47.5(15) | 18.5(13) |
| C4   | 68.0(15) | 78.2(17) | 74.7(16)  | 32.1(13) | 46.7(14) | 23.4(13) |
| C5   | 61.1(14) | 61.3(14) | 68.2(15)  | 22.1(11) | 38.8(12) | 12.4(11) |
| C6   | 56.5(13) | 56.5(13) | 67.3(14)  | 25.5(11) | 37.5(12) | 15.0(10) |
| C7   | 69.8(15) | 55.0(13) | 83.2(17)  | 19.3(12) | 54.2(14) | 13.4(11) |
| C8   | 62.2(13) | 51.1(12) | 71.1(15)  | 16.4(10) | 45.2(12) | 15.0(10) |
| C9   | 55.1(12) | 46.3(11) | 60.7(13)  | 11.5(9)  | 36.5(11) | 12.0(9)  |
| C10  | 53.0(11) | 42.4(10) | 59.5(12)  | 10.0(9)  | 36.3(10) | 5.1(8)   |
| C11  | 55.3(12) | 39.1(10) | 63.1(13)  | 9.1(9)   | 37.6(11) | 5.7(8)   |
| C12  | 61.8(13) | 44.2(11) | 69.4(14)  | 16.6(10) | 43.9(12) | 8.8(9)   |
| C13  | 72.1(15) | 40.7(11) | 78.6(16)  | 19.5(10) | 47.9(13) | 13.1(10) |
| C14  | 63.7(14) | 44.0(11) | 77.2(16)  | 11.0(10) | 44.5(13) | 12.7(10) |
| O15  | 94.2(14) | 49.3(9)  | 118.2(16) | 20.6(10) | 76.8(13) | 23.4(9)  |
| C16  | 63.4(13) | 41.3(10) | 75.1(15)  | 12.2(10) | 46.4(12) | 6.1(9)   |
| C17  | 58.4(13) | 38.7(10) | 67.6(14)  | 9.7(9)   | 35.3(11) | 7.5(9)   |
| C18  | 57.6(12) | 43.1(11) | 60.3(13)  | 7.4(9)   | 33.3(11) | 10.2(9)  |
| C19  | 83.9(18) | 54.3(13) | 80.6(17)  | 9.1(12)  | 54.5(15) | 19.5(12) |
| C20  | 230(5)   | 54.2(17) | 176(4)    | 24(2)    | 159(4)   | 46(2)    |
| C21  | 123(3)   | 41.8(13) | 161(4)    | 14.1(17) | 97(3)    | 15.5(15) |
| C22  | 81.3(18) | 39.8(11) | 104(2)    | 14.0(12) | 55.8(17) | 7.6(11)  |
| C23  | 89(2)    | 64.1(16) | 112(2)    | 32.0(16) | 60(2)    | 5.4(15)  |
| C24  | 83.3(18) | 57.4(14) | 92(2)     | 22.0(13) | 55.8(17) | 12.5(13) |

|     |          |          |        |          |          |          |
|-----|----------|----------|--------|----------|----------|----------|
| C28 | 89.2(18) | 38.3(11) | 120(2) | 18.7(12) | 79.8(19) | 8.8(11)  |
| C29 | 86.3(18) | 48.8(13) | 121(2) | 18.1(13) | 81.1(19) | 11.1(12) |
| F1  | 191(4)   | 85(2)    | 172(3) | 67(2)    | 140(3)   | 30(2)    |
| F2  | 132(3)   | 112(2)   | 172(3) | 60(2)    | 127(3)   | 32(2)    |
| F3  | 120(3)   | 245(7)   | 178(3) | 44(4)    | 71(2)    | -55(4)   |
| F1A | 172(6)   | 197(8)   | 151(3) | 80(4)    | 92(4)    | 4(6)     |
| F2A | 99(3)    | 92(4)    | 194(5) | 59(4)    | 113(3)   | 25(3)    |
| F3A | 100(4)   | 86(3)    | 212(5) | 49(3)    | 110(4)   | 4(2)     |

**Table S13 Bond Lengths for 1.**

| Atom Atom Length/Å |     |           | Atom Atom Length/Å |     |          |
|--------------------|-----|-----------|--------------------|-----|----------|
| O1                 | C9  | 1.364(2)  | C8                 | C9  | 1.363(3) |
| O1                 | C10 | 1.367(2)  | C9                 | C18 | 1.447(3) |
| C1                 | O15 | 1.426(3)  | C10                | C11 | 1.461(3) |
| O2                 | C22 | 1.202(3)  | C10                | C16 | 1.338(3) |
| O3                 | C7  | 1.222(3)  | C11                | C12 | 1.391(3) |
| C2                 | C3  | 1.481(4)  | C11                | C28 | 1.389(3) |
| C2                 | F1  | 1.354(6)  | C12                | C13 | 1.380(3) |
| C2                 | F2  | 1.407(6)  | C13                | C14 | 1.386(3) |
| C2                 | F3  | 1.203(7)  | C14                | O15 | 1.367(3) |
| C2                 | F1A | 1.094(11) | C14                | C29 | 1.379(3) |
| C2                 | F2A | 1.409(9)  | C16                | C17 | 1.424(3) |
| C2                 | F3A | 1.479(9)  | C17                | C18 | 1.357(3) |
| C3                 | C4  | 1.379(4)  | C17                | C22 | 1.503(3) |
| C3                 | C23 | 1.380(5)  | C18                | C19 | 1.506(3) |
| C4                 | C5  | 1.384(3)  | C19                | C20 | 1.523(5) |
| C5                 | C6  | 1.387(3)  | C20                | C21 | 1.400(5) |
| C6                 | C7  | 1.509(3)  | C21                | C22 | 1.484(4) |
| C6                 | C24 | 1.383(4)  | C23                | C24 | 1.381(4) |
| C7                 | C8  | 1.449(3)  | C28                | C29 | 1.375(3) |

**Table S14 Bond Angles for 1.**

| Atom Atom Atom Angle/° |    |     |            | Atom Atom Atom Angle/° |     |     |            |
|------------------------|----|-----|------------|------------------------|-----|-----|------------|
| C9                     | O1 | C10 | 123.03(17) | C16                    | C10 | O1  | 119.84(19) |
| F1                     | C2 | C3  | 111.1(4)   | C16                    | C10 | C11 | 128.7(2)   |
| F1                     | C2 | F2  | 95.9(4)    | C12                    | C11 | C10 | 121.30(19) |
| F2                     | C2 | C3  | 113.0(3)   | C28                    | C11 | C10 | 120.79(19) |
| F3                     | C2 | C3  | 116.8(5)   | C28                    | C11 | C12 | 117.9(2)   |
| F3                     | C2 | F1  | 111.7(5)   | C13                    | C12 | C11 | 120.8(2)   |
| F3                     | C2 | F2  | 106.3(5)   | C12                    | C13 | C14 | 120.2(2)   |
| F1A                    | C2 | C3  | 123.5(8)   | O15                    | C14 | C13 | 115.6(2)   |
| F1A                    | C2 | F2A | 118.8(9)   | O15                    | C14 | C29 | 124.8(2)   |
| F1A                    | C2 | F3A | 101.2(9)   | C29                    | C14 | C13 | 119.5(2)   |
| F2A                    | C2 | C3  | 109.3(4)   | C14                    | O15 | C1  | 117.6(2)   |
| F2A                    | C2 | F3A | 85.6(5)    | C10                    | C16 | C17 | 119.9(2)   |
| F3A                    | C2 | C3  | 110.6(4)   | C16                    | C17 | C22 | 117.5(2)   |
| C4                     | C3 | C2  | 119.2(3)   | C18                    | C17 | C16 | 120.9(2)   |
| C4                     | C3 | C23 | 120.7(2)   | C18                    | C17 | C22 | 121.6(2)   |
| C23                    | C3 | C2  | 120.1(3)   | C9                     | C18 | C19 | 119.4(2)   |
| C3                     | C4 | C5  | 119.4(3)   | C17                    | C18 | C9  | 118.27(19) |

|     |     |     |            |     |     |     |          |
|-----|-----|-----|------------|-----|-----|-----|----------|
| C4  | C5  | C6  | 120.5(3)   | C17 | C18 | C19 | 122.3(2) |
| C5  | C6  | C7  | 123.1(2)   | C18 | C19 | C20 | 110.7(2) |
| C24 | C6  | C5  | 119.3(2)   | C21 | C20 | C19 | 118.7(3) |
| C24 | C6  | C7  | 117.5(2)   | C20 | C21 | C22 | 114.2(3) |
| O3  | C7  | C6  | 118.2(2)   | O2  | C22 | C17 | 120.2(2) |
| O3  | C7  | C8  | 124.6(2)   | O2  | C22 | C21 | 123.2(2) |
| C8  | C7  | C6  | 117.2(2)   | C21 | C22 | C17 | 116.5(2) |
| C9  | C8  | C7  | 125.8(2)   | C3  | C23 | C24 | 119.6(3) |
| O1  | C9  | C18 | 117.86(18) | C23 | C24 | C6  | 120.4(3) |
| C8  | C9  | O1  | 116.71(19) | C29 | C28 | C11 | 121.5(2) |
| C8  | C9  | C18 | 125.4(2)   | C28 | C29 | C14 | 120.0(2) |
| O1  | C10 | C11 | 111.41(17) |     |     |     |          |

**Table S15 Torsion Angles for 1.**

| A   | B   | C   | D   | Angle <sup>o</sup> | A   | B   | C   | D   | Angle <sup>o</sup> |
|-----|-----|-----|-----|--------------------|-----|-----|-----|-----|--------------------|
| O1  | C9  | C18 | C17 | 4.3(3)             | C12 | C13 | C14 | C29 | -1.8(4)            |
| O1  | C9  | C18 | C19 | -176.2(2)          | C13 | C14 | O15 | C1  | -175.7(3)          |
| O1  | C10 | C11 | C12 | -0.3(3)            | C13 | C14 | C29 | C28 | 1.5(5)             |
| O1  | C10 | C11 | C28 | 179.3(2)           | O15 | C14 | C29 | C28 | 179.3(3)           |
| O1  | C10 | C16 | C17 | 3.1(4)             | C16 | C10 | C11 | C12 | 177.9(3)           |
| O3  | C7  | C8  | C9  | 1.4(5)             | C16 | C10 | C11 | C28 | -2.5(4)            |
| C2  | C3  | C4  | C5  | -179.6(3)          | C16 | C17 | C18 | C9  | -3.7(4)            |
| C2  | C3  | C23 | C24 | -179.6(3)          | C16 | C17 | C18 | C19 | 176.9(2)           |
| C3  | C4  | C5  | C6  | 0.2(4)             | C16 | C17 | C22 | O2  | -0.9(5)            |
| C3  | C23 | C24 | C6  | -1.9(5)            | C16 | C17 | C22 | C21 | 177.0(3)           |
| C4  | C3  | C23 | C24 | 0.5(5)             | C17 | C18 | C19 | C20 | -14.3(4)           |
| C4  | C5  | C6  | C7  | -178.9(2)          | C18 | C17 | C22 | O2  | 178.2(3)           |
| C4  | C5  | C6  | C24 | -1.6(4)            | C18 | C17 | C22 | C21 | -3.9(5)            |
| C5  | C6  | C7  | O3  | 154.4(3)           | C18 | C19 | C20 | C21 | 40.6(6)            |
| C5  | C6  | C7  | C8  | -26.7(4)           | C19 | C20 | C21 | C22 | -48.1(7)           |
| C5  | C6  | C24 | C23 | 2.4(4)             | C20 | C21 | C22 | O2  | -153.9(4)          |
| C6  | C7  | C8  | C9  | -177.4(2)          | C20 | C21 | C22 | C17 | 28.3(5)            |
| C7  | C6  | C24 | C23 | 179.9(3)           | C22 | C17 | C18 | C9  | 177.3(2)           |
| C7  | C8  | C9  | O1  | 1.1(4)             | C22 | C17 | C18 | C19 | -2.1(4)            |
| C7  | C8  | C9  | C18 | -178.4(3)          | C23 | C3  | C4  | C5  | 0.3(5)             |
| C8  | C9  | C18 | C17 | -176.2(2)          | C24 | C6  | C7  | O3  | -23.0(4)           |
| C8  | C9  | C18 | C19 | 3.3(4)             | C24 | C6  | C7  | C8  | 155.9(3)           |
| C9  | O1  | C10 | C11 | 175.9(2)           | C28 | C11 | C12 | C13 | 1.6(4)             |
| C9  | O1  | C10 | C16 | -2.4(4)            | C29 | C14 | O15 | C1  | 6.4(5)             |
| C9  | C18 | C19 | C20 | 166.2(3)           | F1  | C2  | C3  | C4  | -113.1(4)          |
| C10 | O1  | C9  | C8  | 179.1(2)           | F1  | C2  | C3  | C23 | 66.9(6)            |
| C10 | O1  | C9  | C18 | -1.3(3)            | F2  | C2  | C3  | C4  | -6.6(5)            |
| C10 | C11 | C12 | C13 | -178.8(2)          | F2  | C2  | C3  | C23 | 173.5(4)           |
| C10 | C11 | C28 | C29 | 178.4(3)           | F3  | C2  | C3  | C4  | 117.1(7)           |
| C10 | C16 | C17 | C18 | 0.0(4)             | F3  | C2  | C3  | C23 | -62.8(7)           |
| C10 | C16 | C17 | C22 | 179.0(2)           | F1A | C2  | C3  | C4  | -73.9(12)          |
| C11 | C10 | C16 | C17 | -174.9(2)          | F1A | C2  | C3  | C23 | 106.2(12)          |
| C11 | C12 | C13 | C14 | 0.2(4)             | F2A | C2  | C3  | C4  | 73.7(6)            |
| C11 | C28 | C29 | C14 | 0.4(5)             | F2A | C2  | C3  | C23 | -106.2(6)          |
| C12 | C11 | C28 | C29 | -1.9(5)            | F3A | C2  | C3  | C4  | 166.3(5)           |

**Table S16 Hydrogen Atom Coordinates ( $\text{\AA} \times 10^4$ ) and Isotropic Displacement Parameters ( $\text{\AA}^2 \times 10^3$ ) for 1.**

| Atom | x        | y        | z        | U(eq) |
|------|----------|----------|----------|-------|
| H1A  | 10078.79 | 2047.75  | -1052.33 | 133   |
| H1B  | 10944.33 | 940.17   | -388.36  | 133   |
| H1C  | 11358.31 | 2314.71  | 412.8    | 133   |
| H4   | 946.3    | 4399.09  | 5872.87  | 79    |
| H5   | 2595.83  | 5143.49  | 5011.98  | 70    |
| H8   | 3229.25  | 5771.87  | 3508.68  | 66    |
| H12  | 6290.95  | 3020.56  | 1861.73  | 63    |
| H13  | 7586.82  | 1439.94  | 1332.55  | 68    |
| H16  | 7018.64  | 6912.17  | 963.26   | 65    |
| H19A | 4211.67  | 7842.32  | 4061.14  | 79    |
| H19B | 2951.76  | 7911.57  | 2627.77  | 79    |
| H20A | 3937.13  | 9924.43  | 3420.43  | 153   |
| H20B | 5602.25  | 9564.12  | 4085.96  | 153   |
| H21A | 5499.95  | 10569.06 | 2502.89  | 115   |
| H21B | 3978.34  | 9785.83  | 1477.08  | 115   |
| H23  | 555.81   | 969.31   | 3790.16  | 97    |
| H24  | 2249.21  | 1703.24  | 2973.2   | 84    |
| H28  | 8233.06  | 5418.74  | 363.18   | 84    |
| H29  | 9542.75  | 3849.1   | -146.78  | 87    |

**Table S17 Atomic Occupancy for 1.**

| Atom | Occupancy | Atom | Occupancy | Atom | Occupancy |
|------|-----------|------|-----------|------|-----------|
| F1   | 0.651(5)  | F2   | 0.651(5)  | F3   | 0.651(5)  |
| F1A  | 0.349(5)  | F2A  | 0.349(5)  | F3A  | 0.349(5)  |

**Experimental**

Single crystals of  $\text{C}_{25}\text{H}_{19}\text{F}_3\text{O}_4$  [1] were [1]. A suitable crystal was selected and [1] on a diffractometer. The crystal was kept at 300 K during data collection. Using Olex2 [1], the structure was solved with the Unknown [2] structure solution program using Unknown and refined with the Unknown [3] refinement package using Unknown minimisation.

1. Dolomanov, O.V., Bourhis, L.J., Gildea, R.J., Howard, J.A.K. & Puschmann, H. (2009), *J. Appl. Cryst.* 42, 339-341.
- 2.
- 3.

**Crystal structure determination of [6du]**

**Crystal Data** for  $\text{C}_{25}\text{H}_{19}\text{F}_3\text{O}_4$  ( $M=440.40$  g/mol): triclinic, space group P-1 (no. 2),  $a = 9.6264(17)$   $\text{\AA}$ ,  $b = 10.7417(18)$   $\text{\AA}$ ,  $c = 11.025(2)$   $\text{\AA}$ ,  $\alpha = 97.196(6)^\circ$ ,  $\beta = 113.780(6)^\circ$ ,  $\gamma = 92.477(6)^\circ$ ,  $V = 1029.5(3)$   $\text{\AA}^3$ ,  $Z = 2$ ,  $T = 300$  K,  $\mu(\text{MoK}\alpha) = 0.113$   $\text{mm}^{-1}$ ,  $D_{\text{calc}} = 1.421$   $\text{g/cm}^3$ , 38754 reflections measured ( $4.088^\circ \leq 2\theta \leq 56.546^\circ$ ), 5079 unique ( $R_{\text{int}} = 0.0598$ ,  $R_{\text{sigma}} = 0.0375$ ) which were used in all calculations. The final  $R_1$  was 0.0815 ( $I > 2\sigma(I)$ ) and  $wR_2$  was 0.2684 (all data). **The CCDC deposition number 2328810** contains the supplementary crystallographic data for this paper which can be obtained free of charge at <https://www.ccdc.cam.ac.uk/structures/>

**Refinement model description**

Number of restraints - 114, number of constraints - unknown.

Details:

1. Fixed Uiso

At 1.2 times of:

All C(H) groups, All C(H,H) groups

At 1.5 times of:

All C(H,H,H) groups

2. Rigid bond restraints

C2, F1, F2, F3, F1A, F2A, F3A

with sigma for 1-2 distances of 0.01 and sigma for 1-3 distances of 0.01

3. Uiso/Uaniso restraints and constraints

C2  $\approx$  F1  $\approx$  F2  $\approx$  F3  $\approx$  F1A  $\approx$  F2A  $\approx$  F3A: within 1.7Å with  
sigma of 0.01 and sigma for terminal atoms of 0.02 within 1.7Å

4. Rigid body (RIGU) restrains

C2, F1, F2, F3, F1A, F2A, F3A

with sigma for 1-2 distances of 0.001 and sigma for 1-3 distances of 0.001

5. Others

Sof(F1A)=Sof(F2A)=Sof(F3A)=1-FVAR(1)

Sof(F1)=Sof(F2)=Sof(F3)=FVAR(1)

6.a Secondary CH2 refined with riding coordinates:

C19(H19A,H19B), C20(H20A,H20B), C21(H21A,H21B)

6.b Aromatic/amide H refined with riding coordinates:

C4(H4), C5(H5), C8(H8), C12(H12), C13(H13), C16(H16), C23(H23), C24(H24),  
C28(H28), C29(H29)

6.c Idealised Me refined as rotating group:

C1(H1A,H1B,H1C)

This report has been created with Olex2, compiled on 2018.05.29 svn.r3508 for OlexSys. Please [let us know](#) if there are any errors or if you would like to have additional features.

## 5. NMR Spectra



$^{13}\text{C}$  NMR (151 MHz,  $\text{CDCl}_3$ ) of **3a**

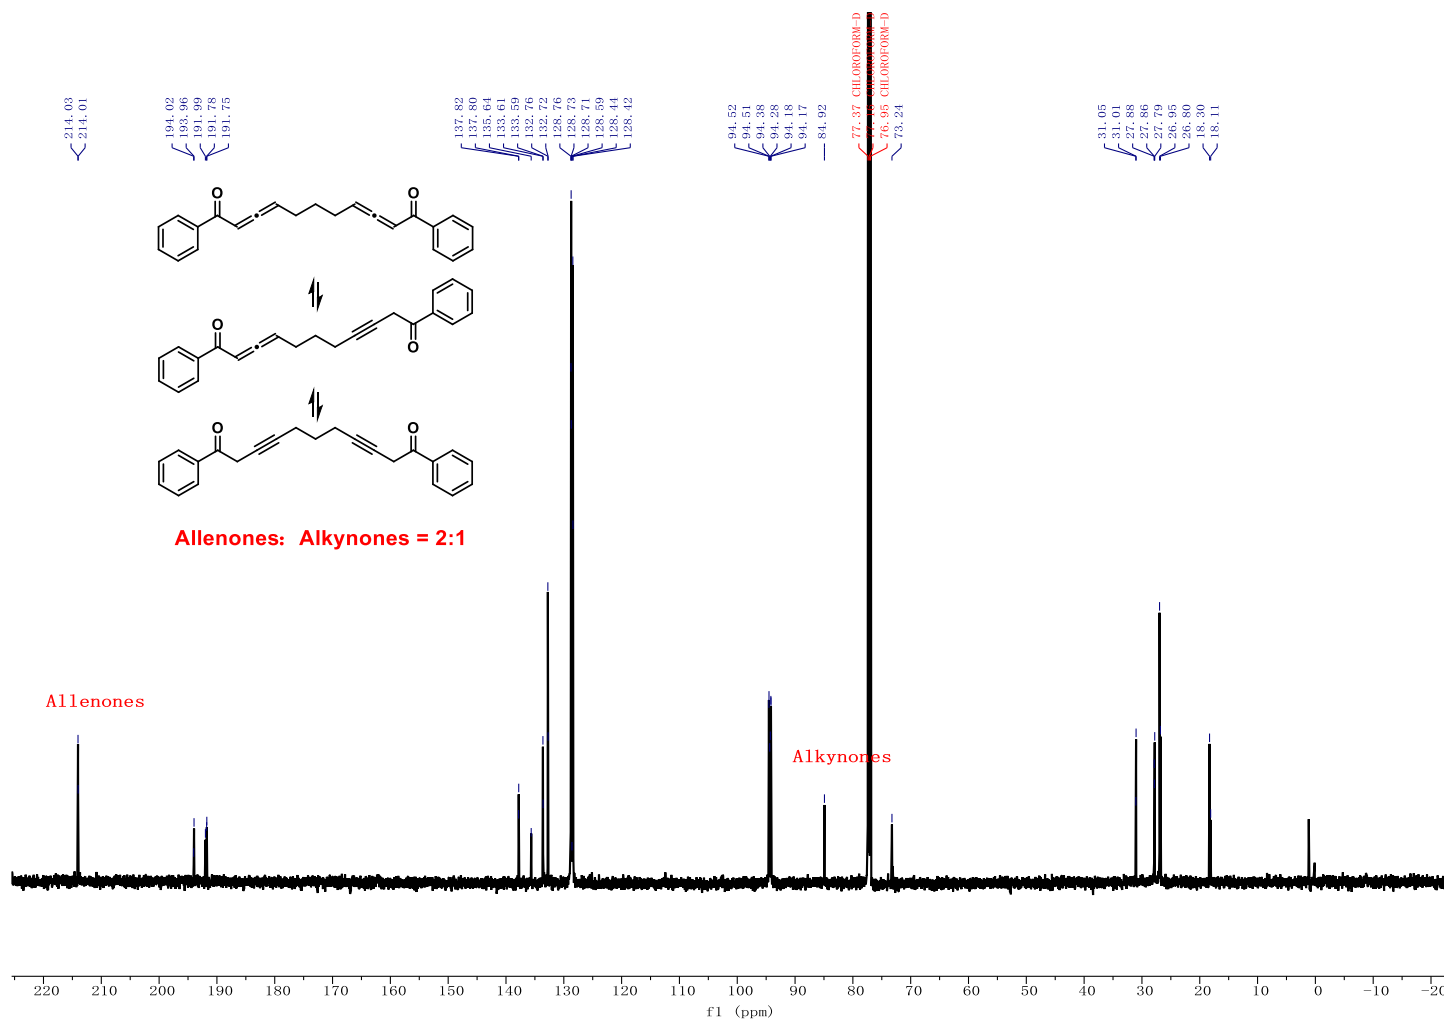

<sup>1</sup>H NMR (600 MHz, CDCl<sub>3</sub>) of **3b**

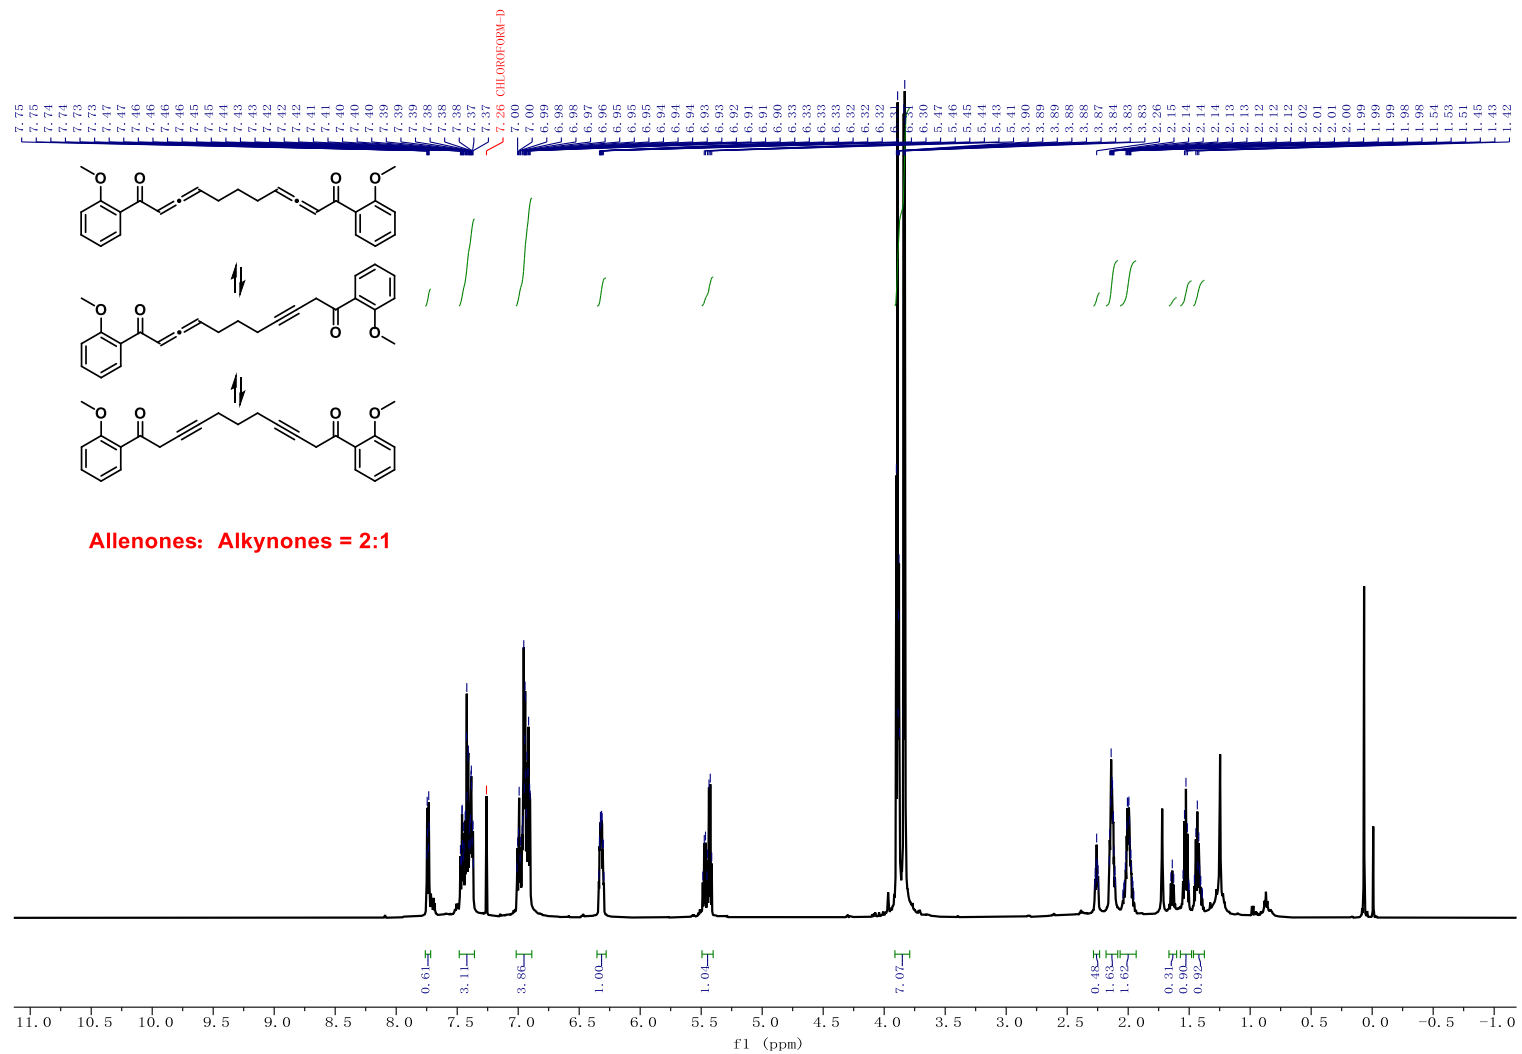



$^{13}\text{C}$  NMR (151 MHz,  $\text{CDCl}_3$ ) of **3b**

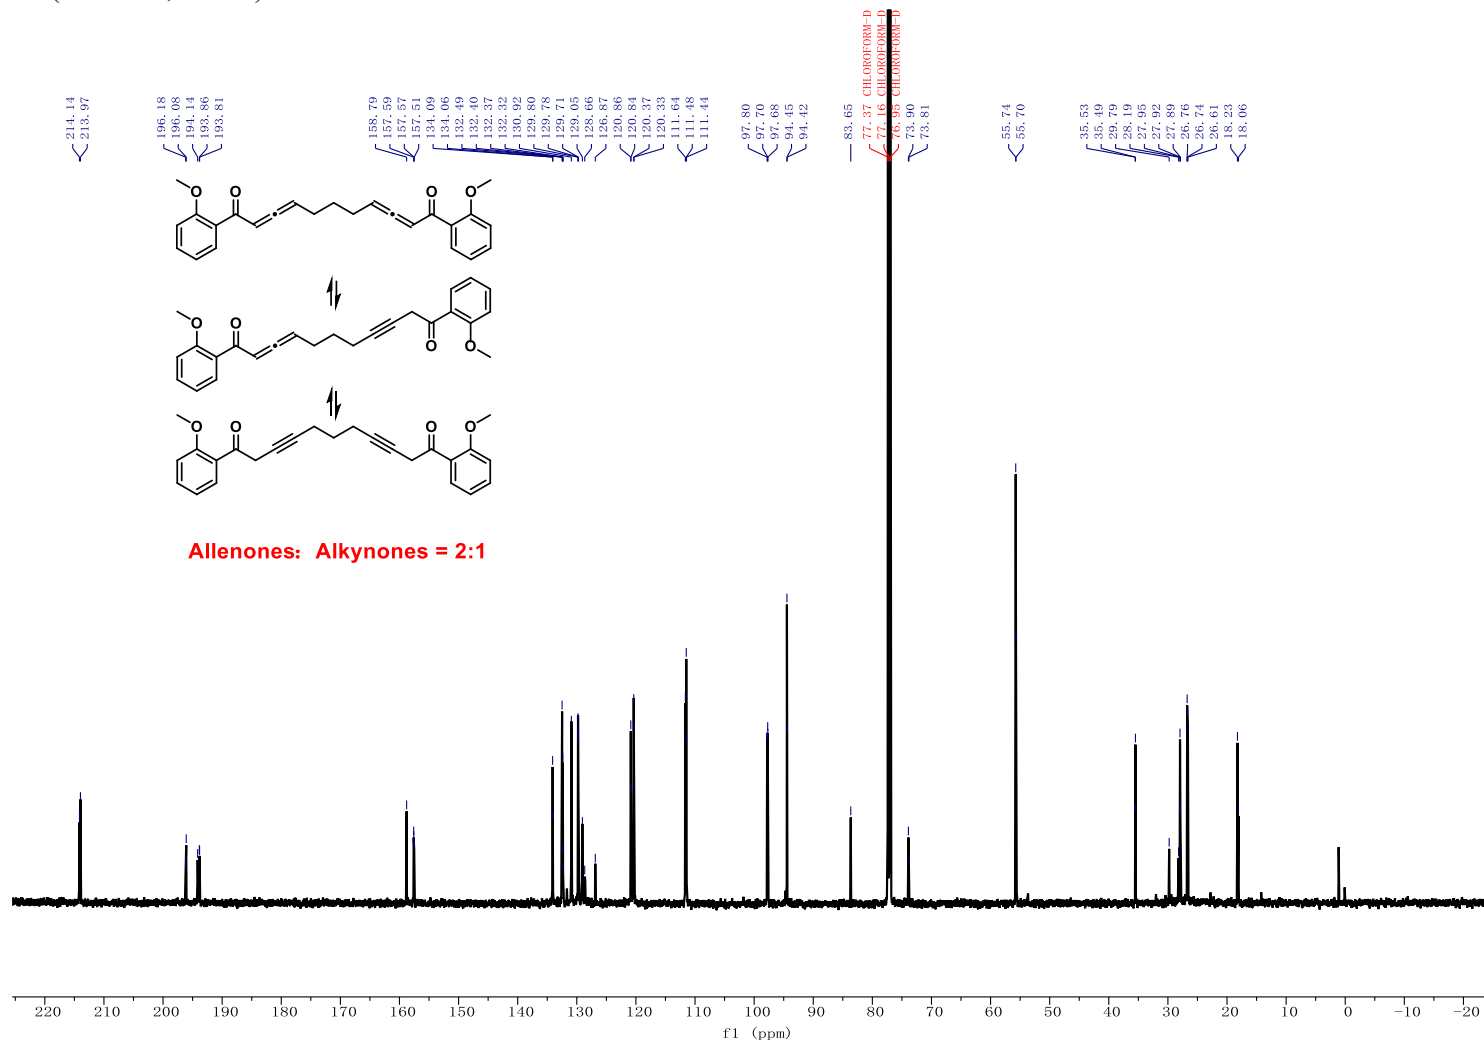

<sup>1</sup>H NMR (600 MHz, CDCl<sub>3</sub>) of 3c

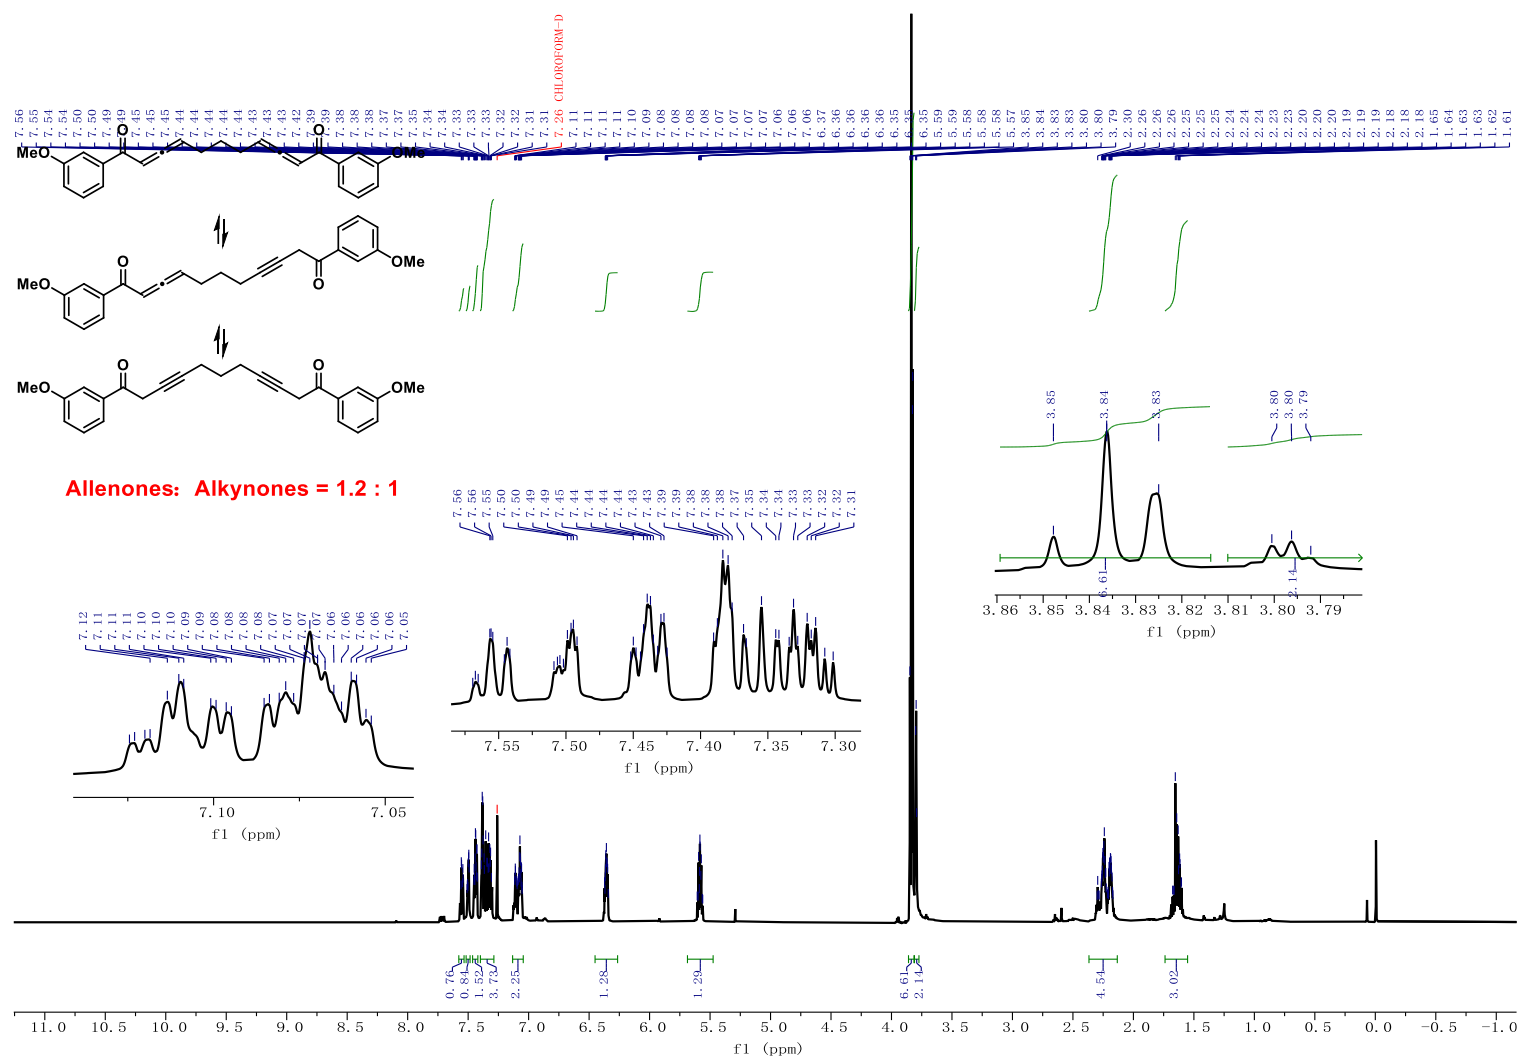

$^{13}\text{C}$  NMR (151 MHz,  $\text{CDCl}_3$ ) of **3c**

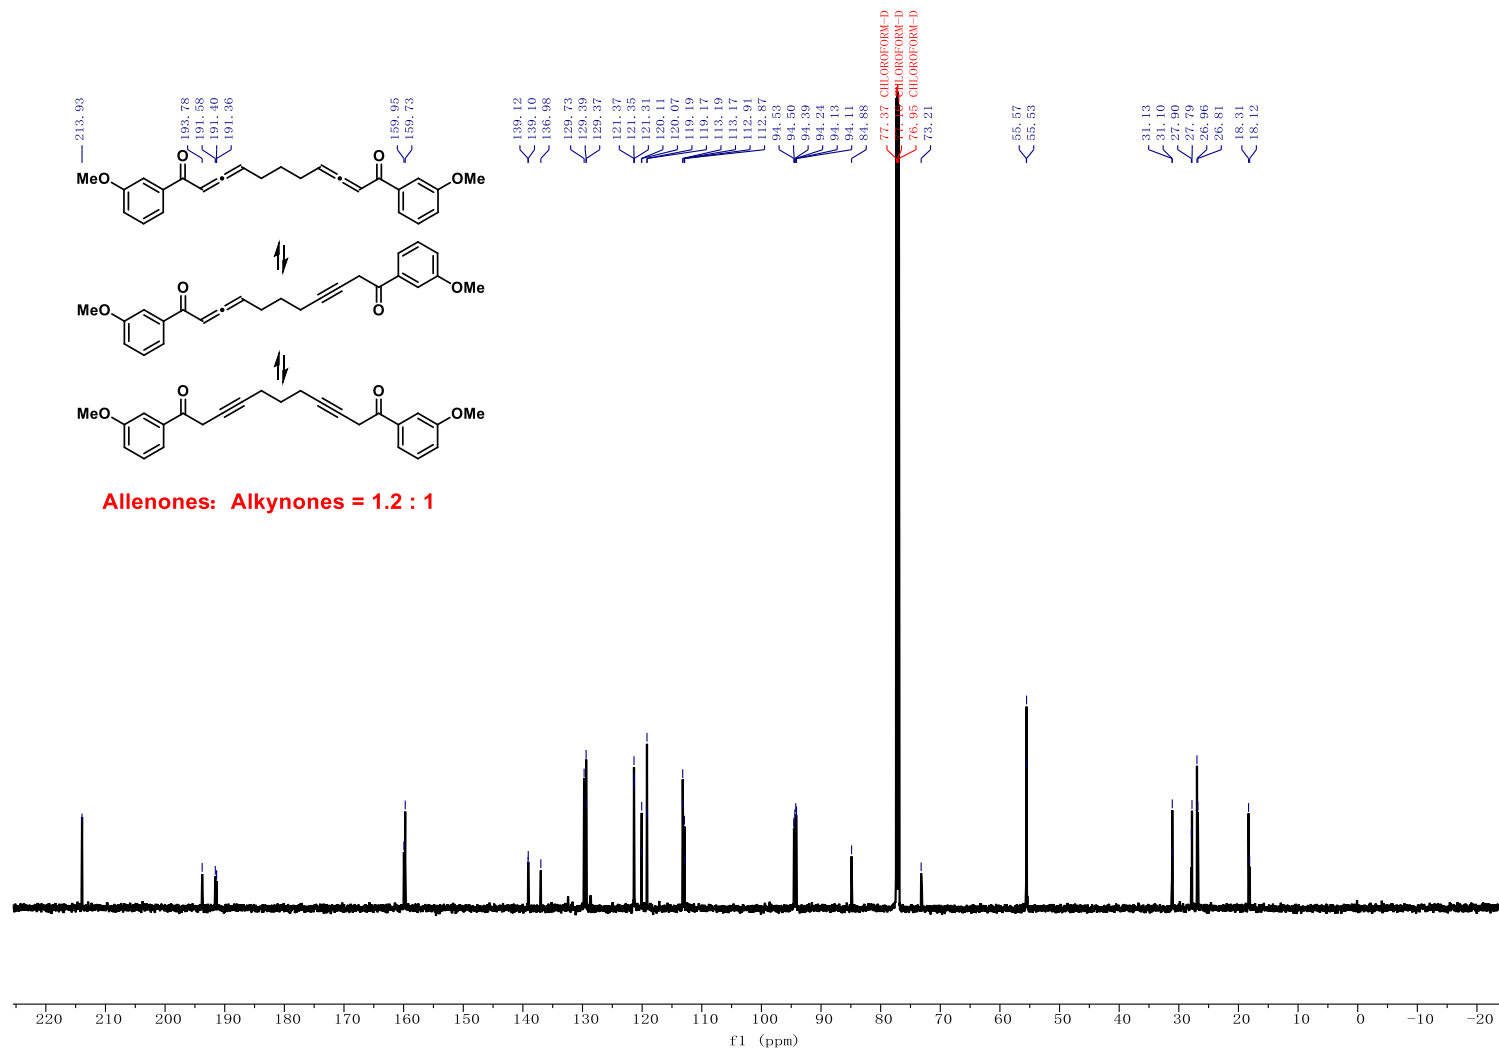

**Allenones: Alkynones = 1.2 : 1**

<sup>1</sup>H NMR (600 MHz, CDCl<sub>3</sub>) of **3d**

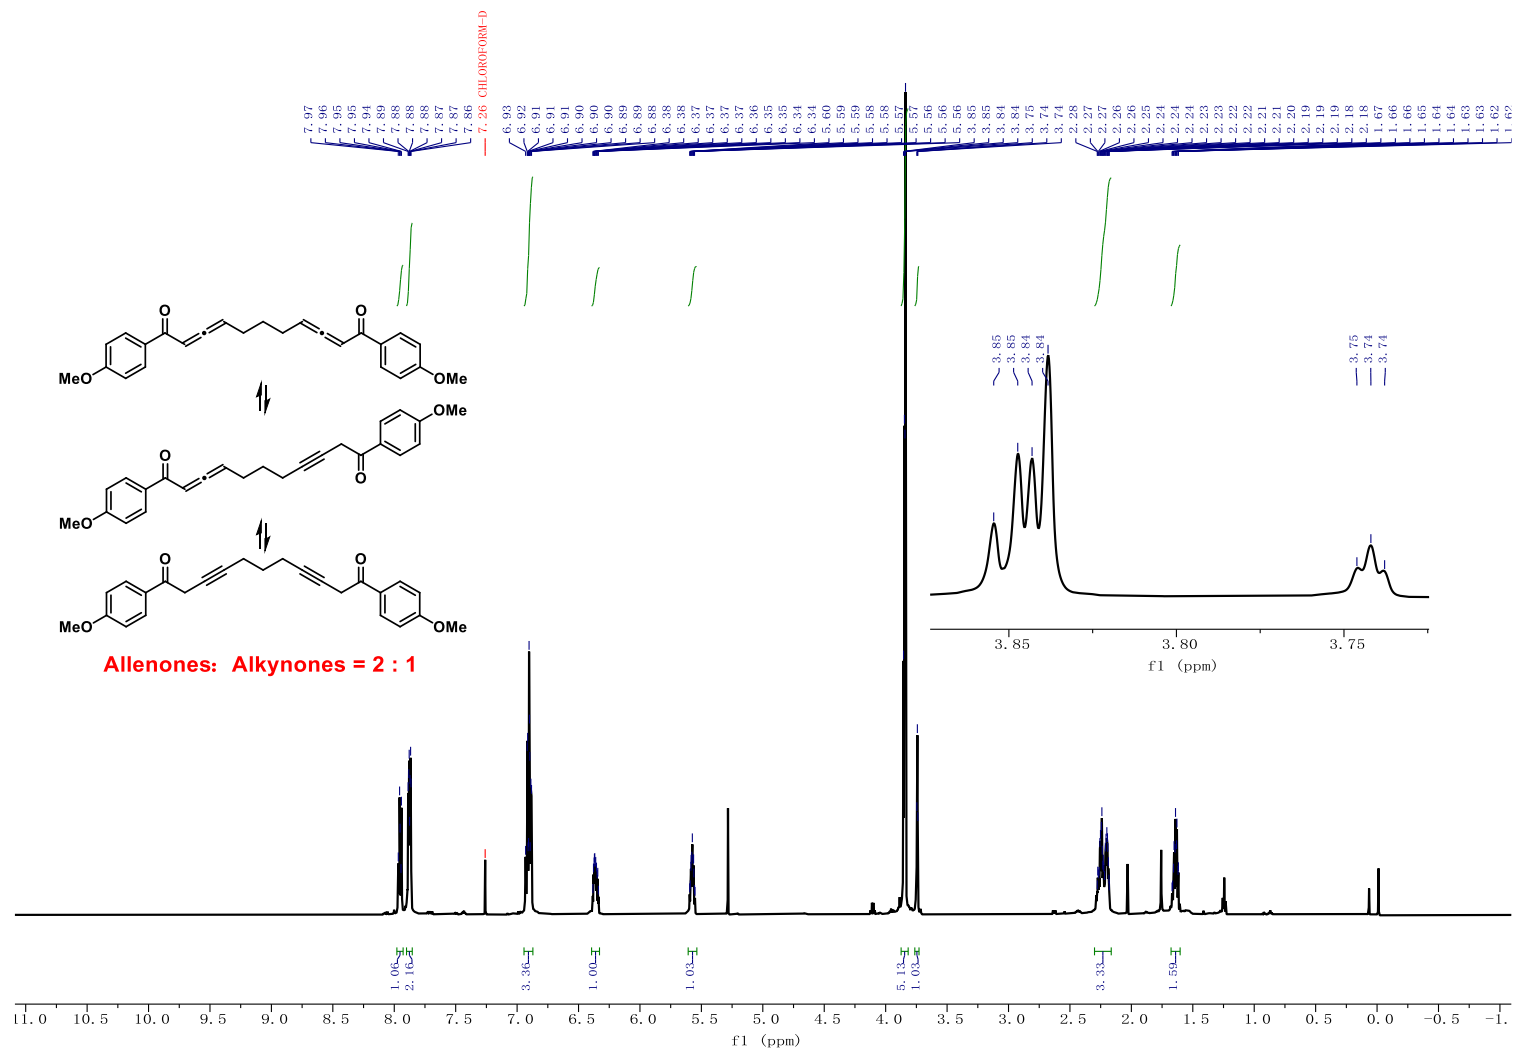

<sup>13</sup>C NMR (151 MHz, CDCl<sub>3</sub>) of **3d**

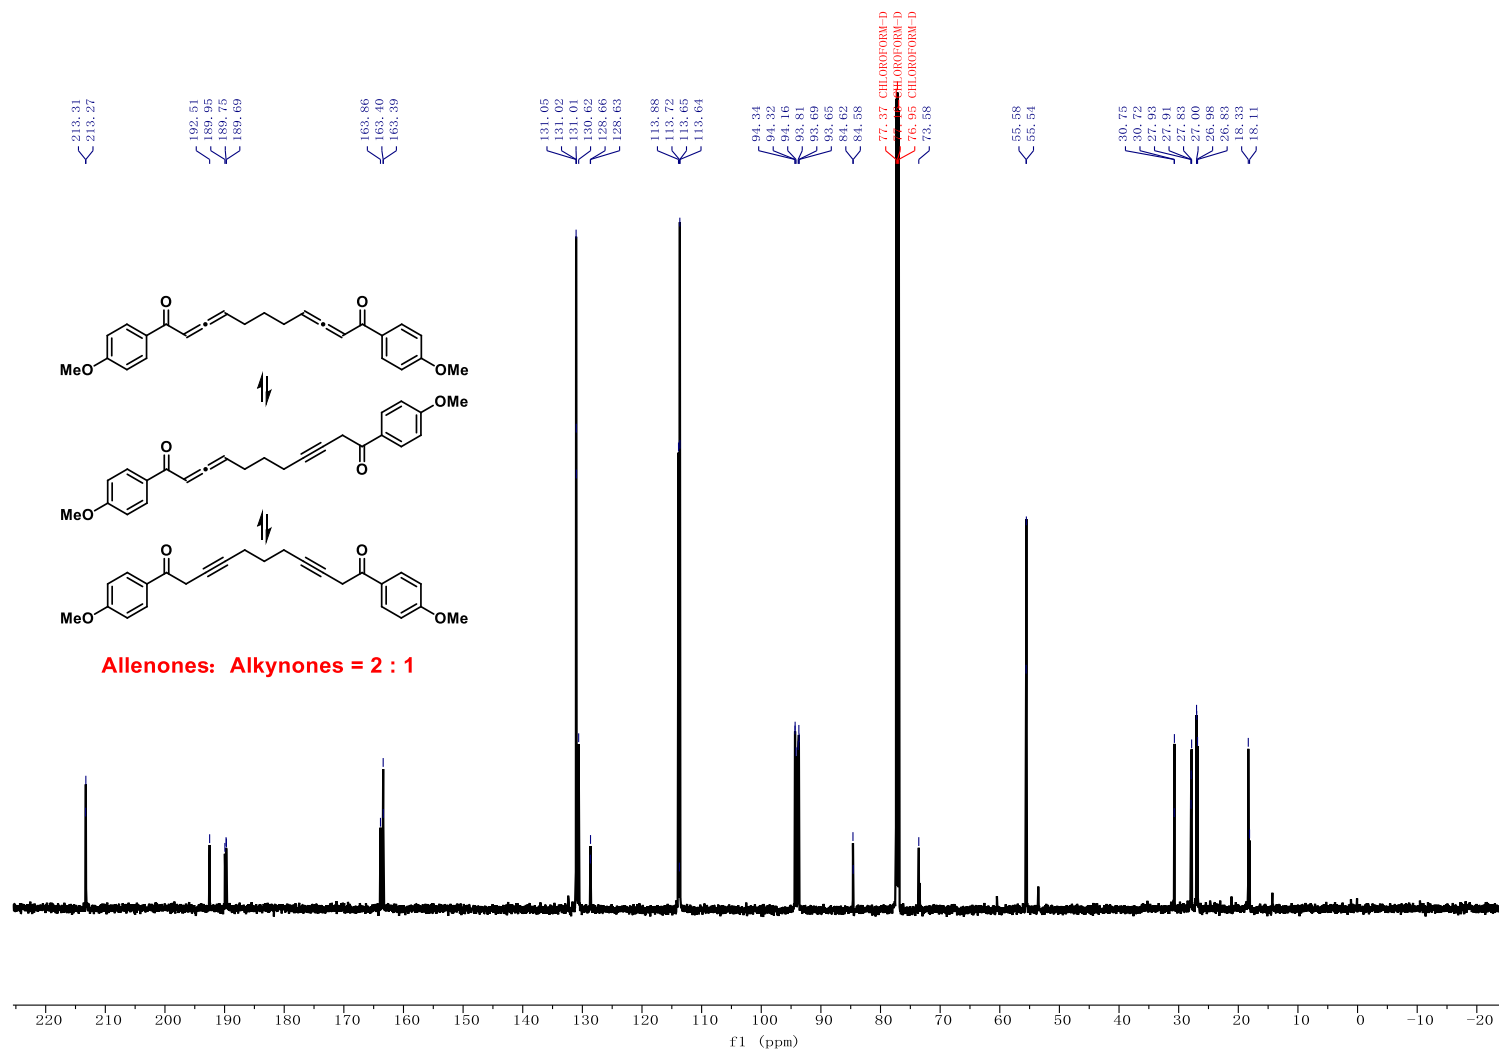

$^1\text{H}$  NMR (600 MHz,  $\text{CDCl}_3$ ) of **3e**

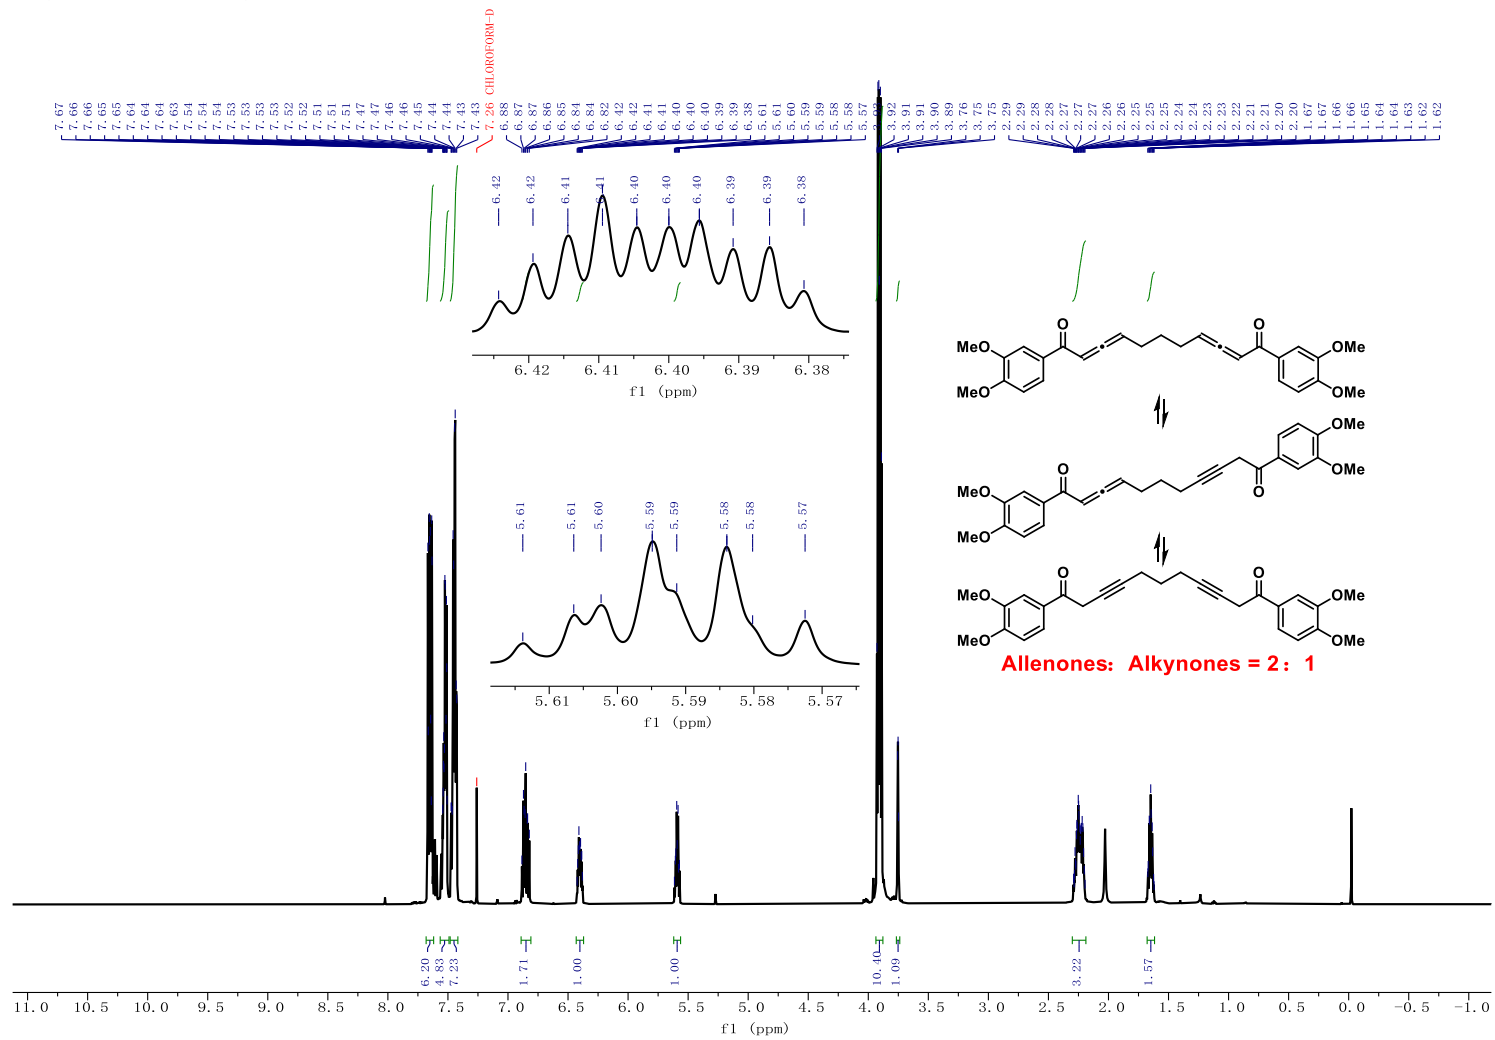

$^{13}\text{C}$  NMR (151 MHz,  $\text{CDCl}_3$ ) of **3e**

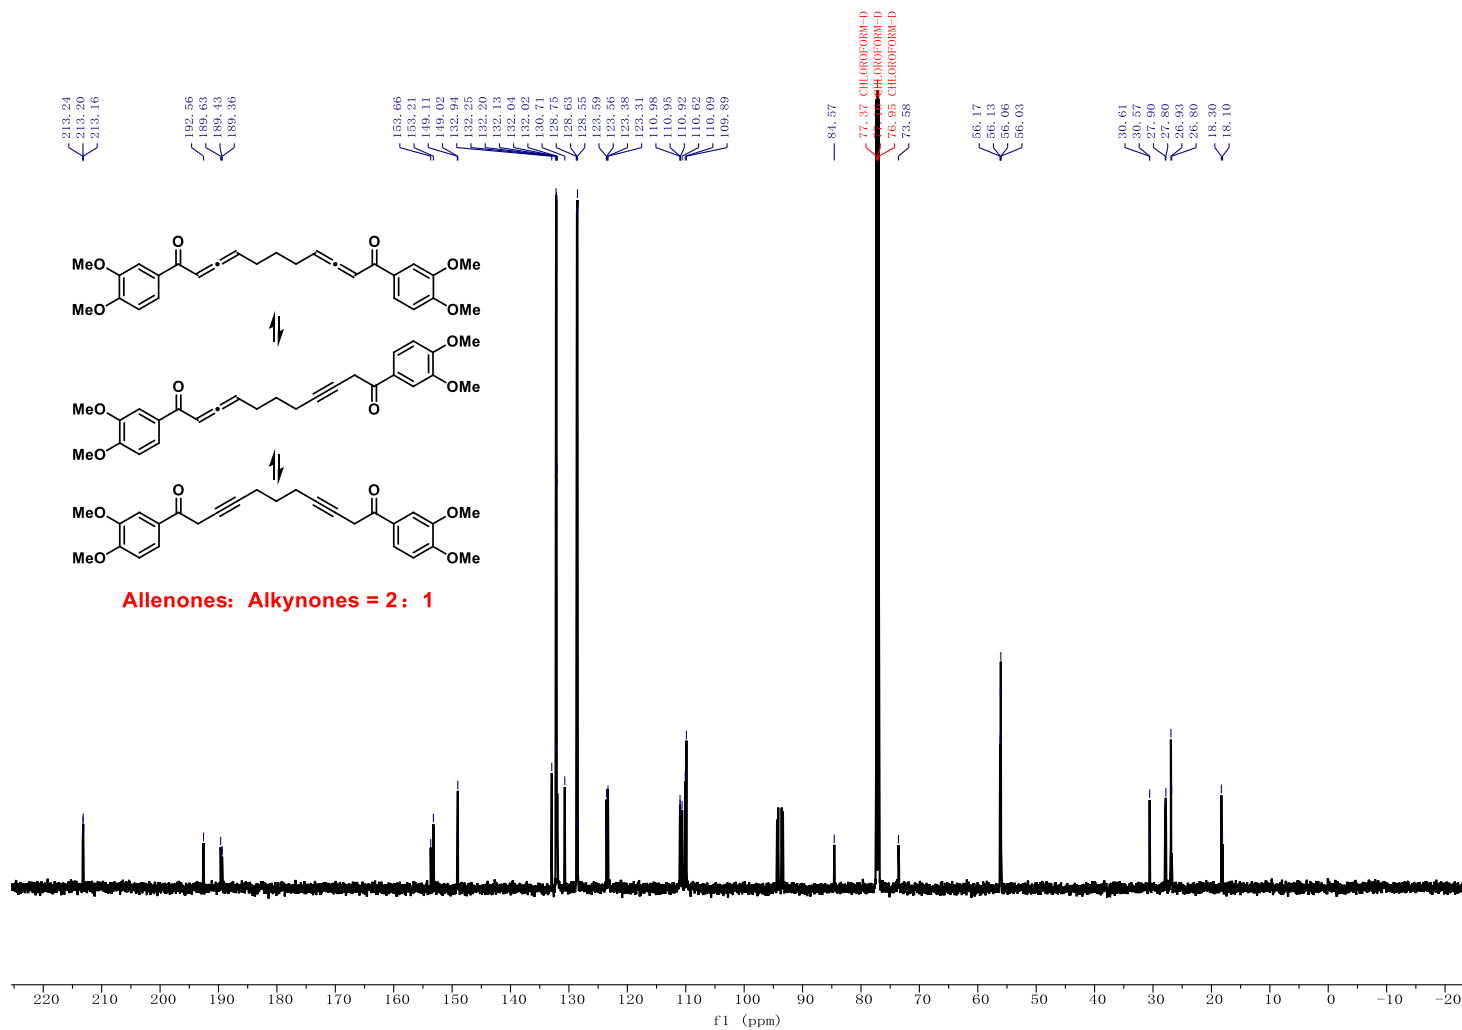

<sup>1</sup>H NMR (600 MHz, CDCl<sub>3</sub>) of **3f**

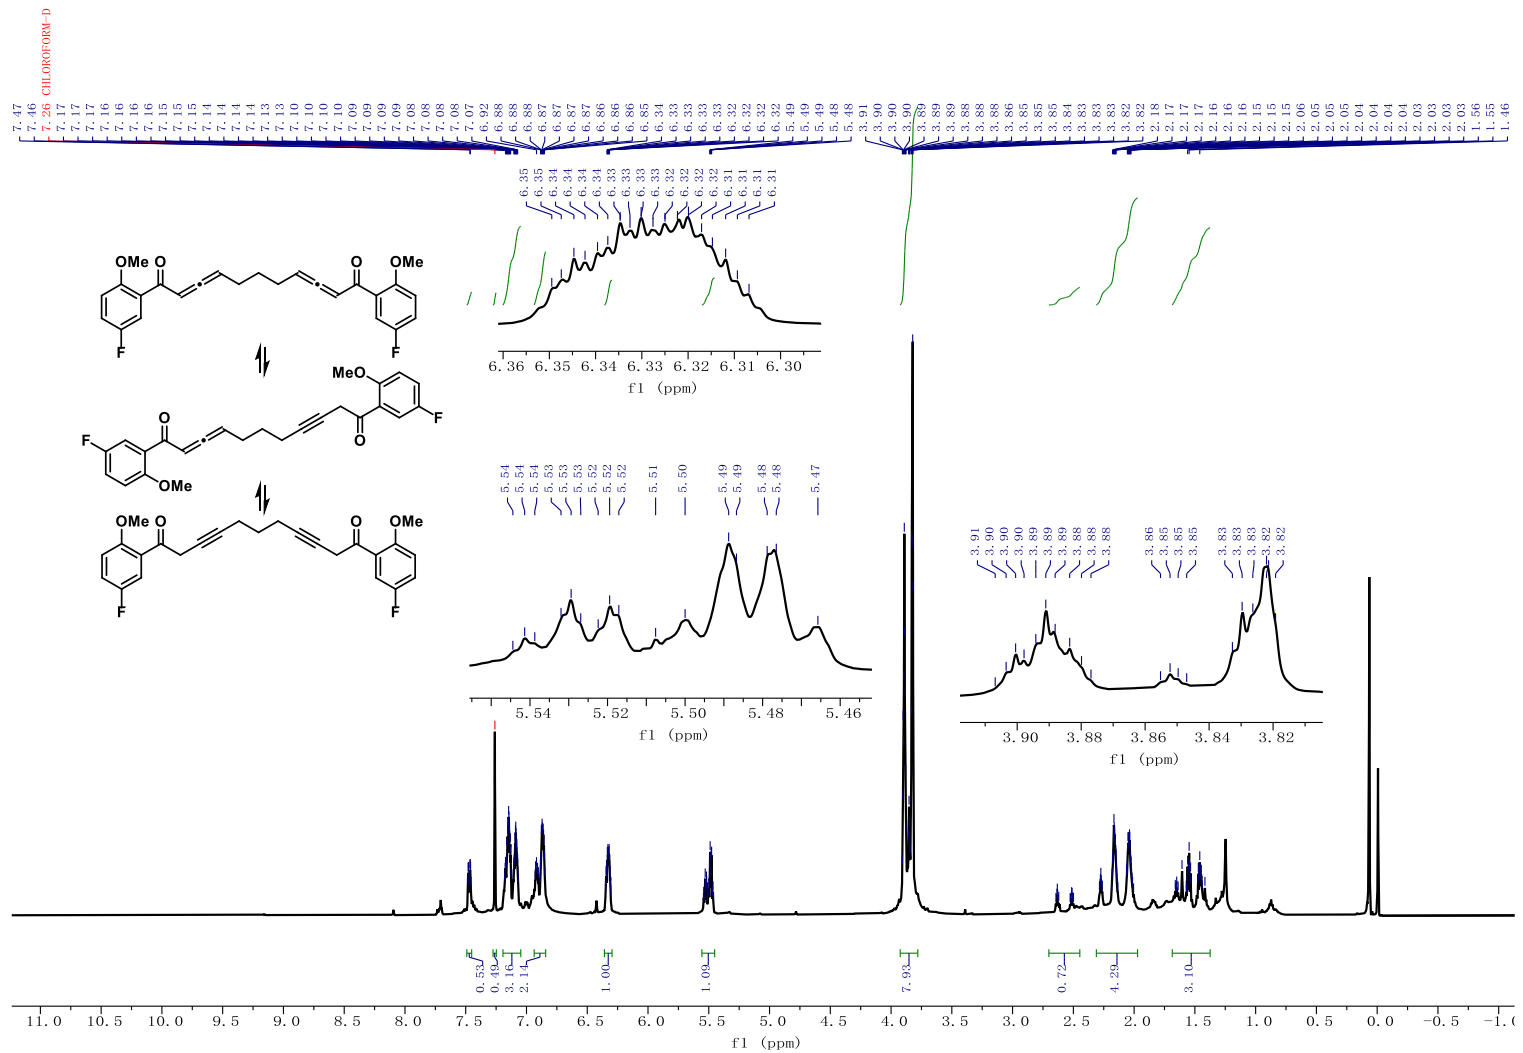



<sup>13</sup>C NMR (151 MHz, CDCl<sub>3</sub>) of **3f**

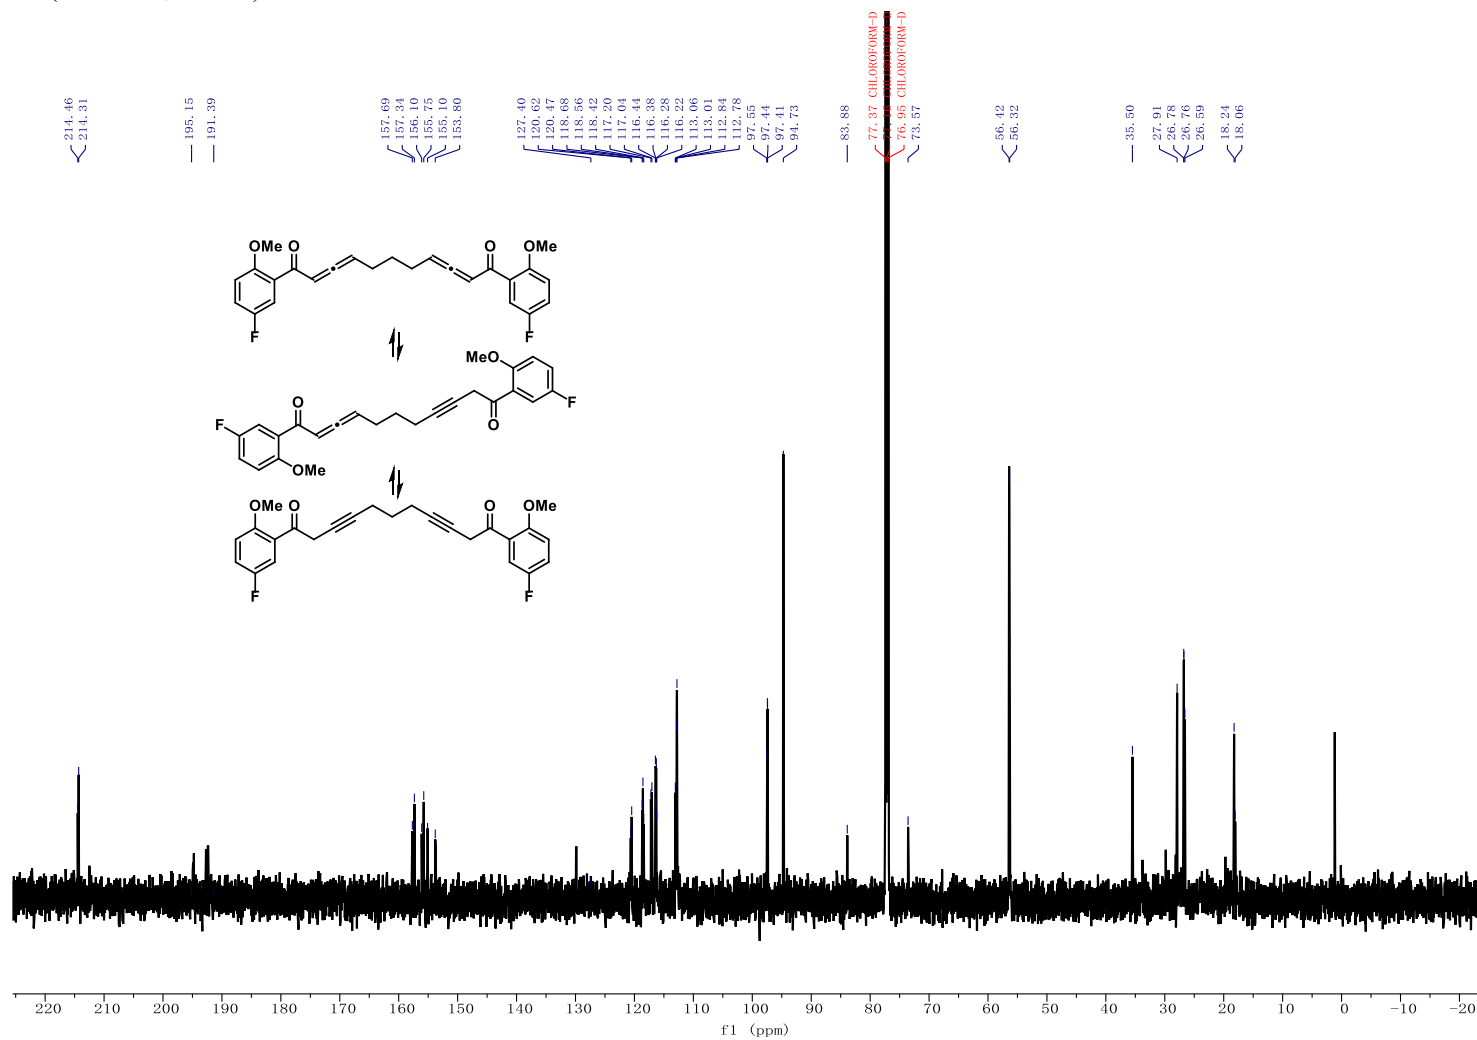

<sup>1</sup>H NMR (600 MHz, CDCl<sub>3</sub>) of **3g**

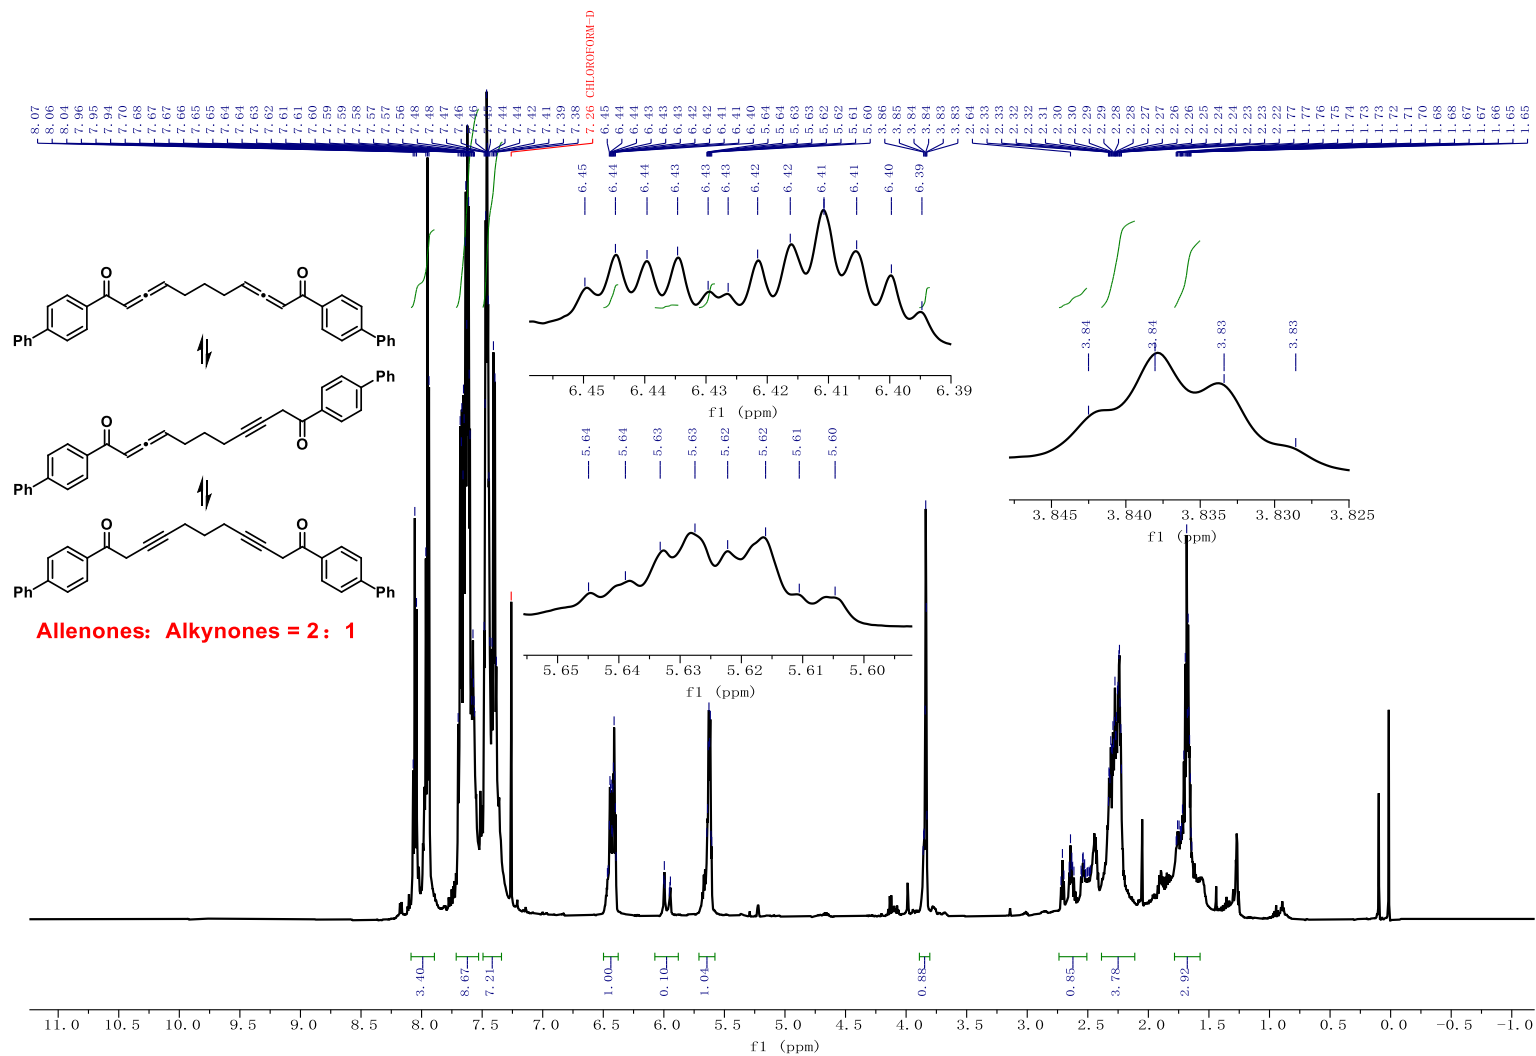

$^{13}\text{C}$  NMR (151 MHz,  $\text{CDCl}_3$ ) of **3g**

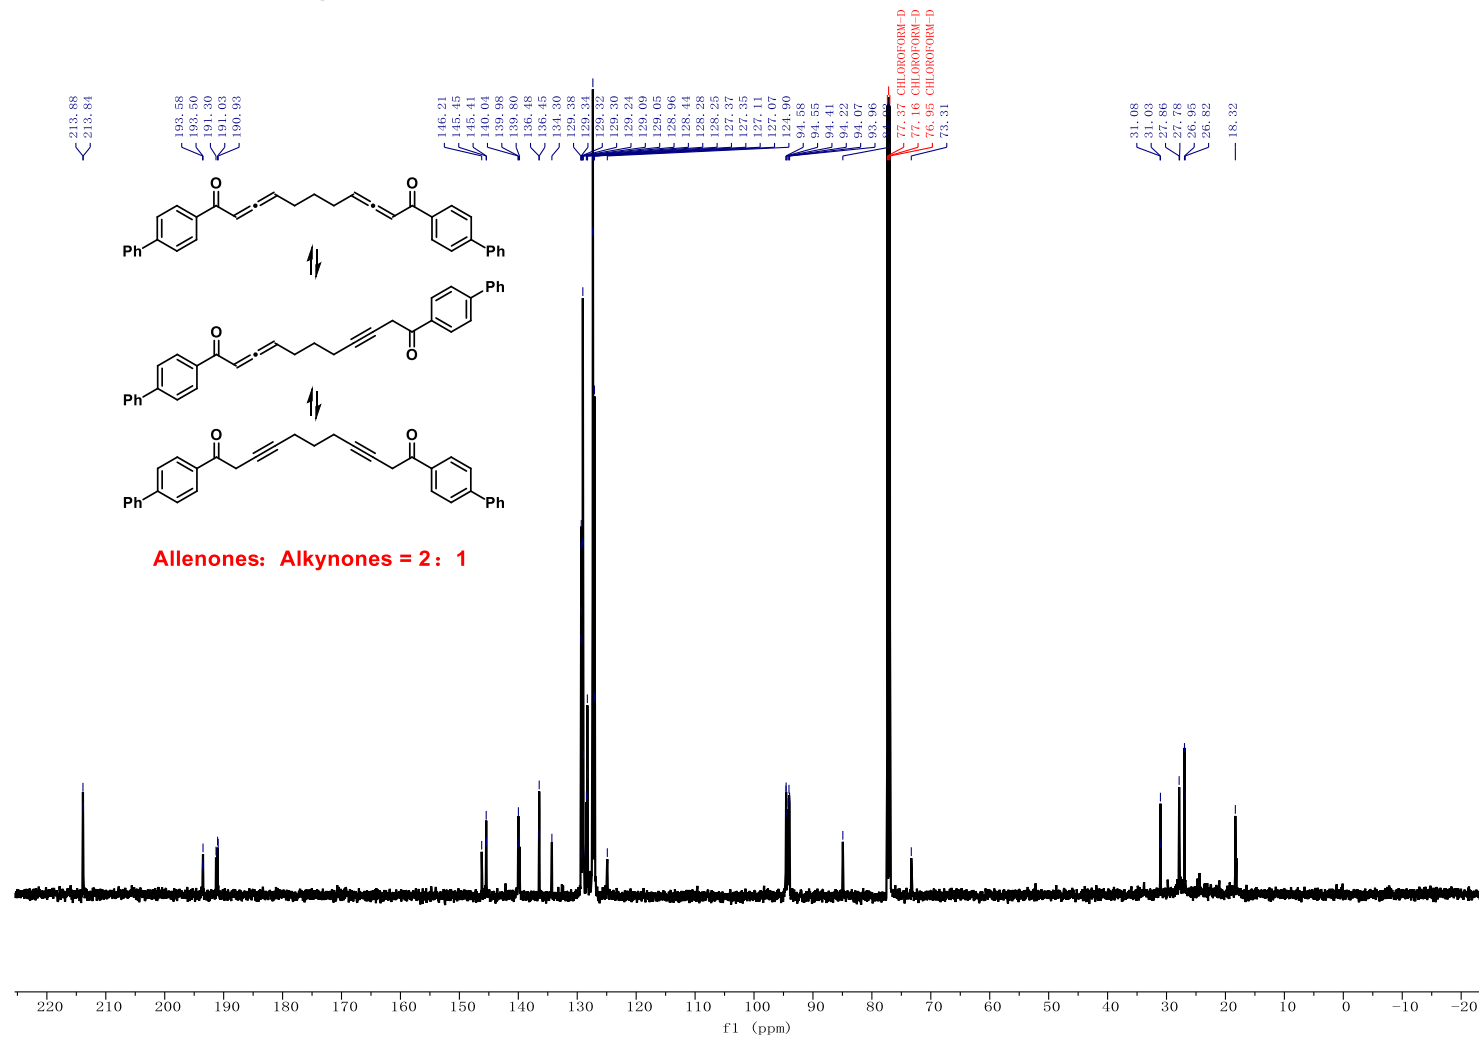

<sup>1</sup>H NMR (600 MHz, CDCl<sub>3</sub>) of **3h**

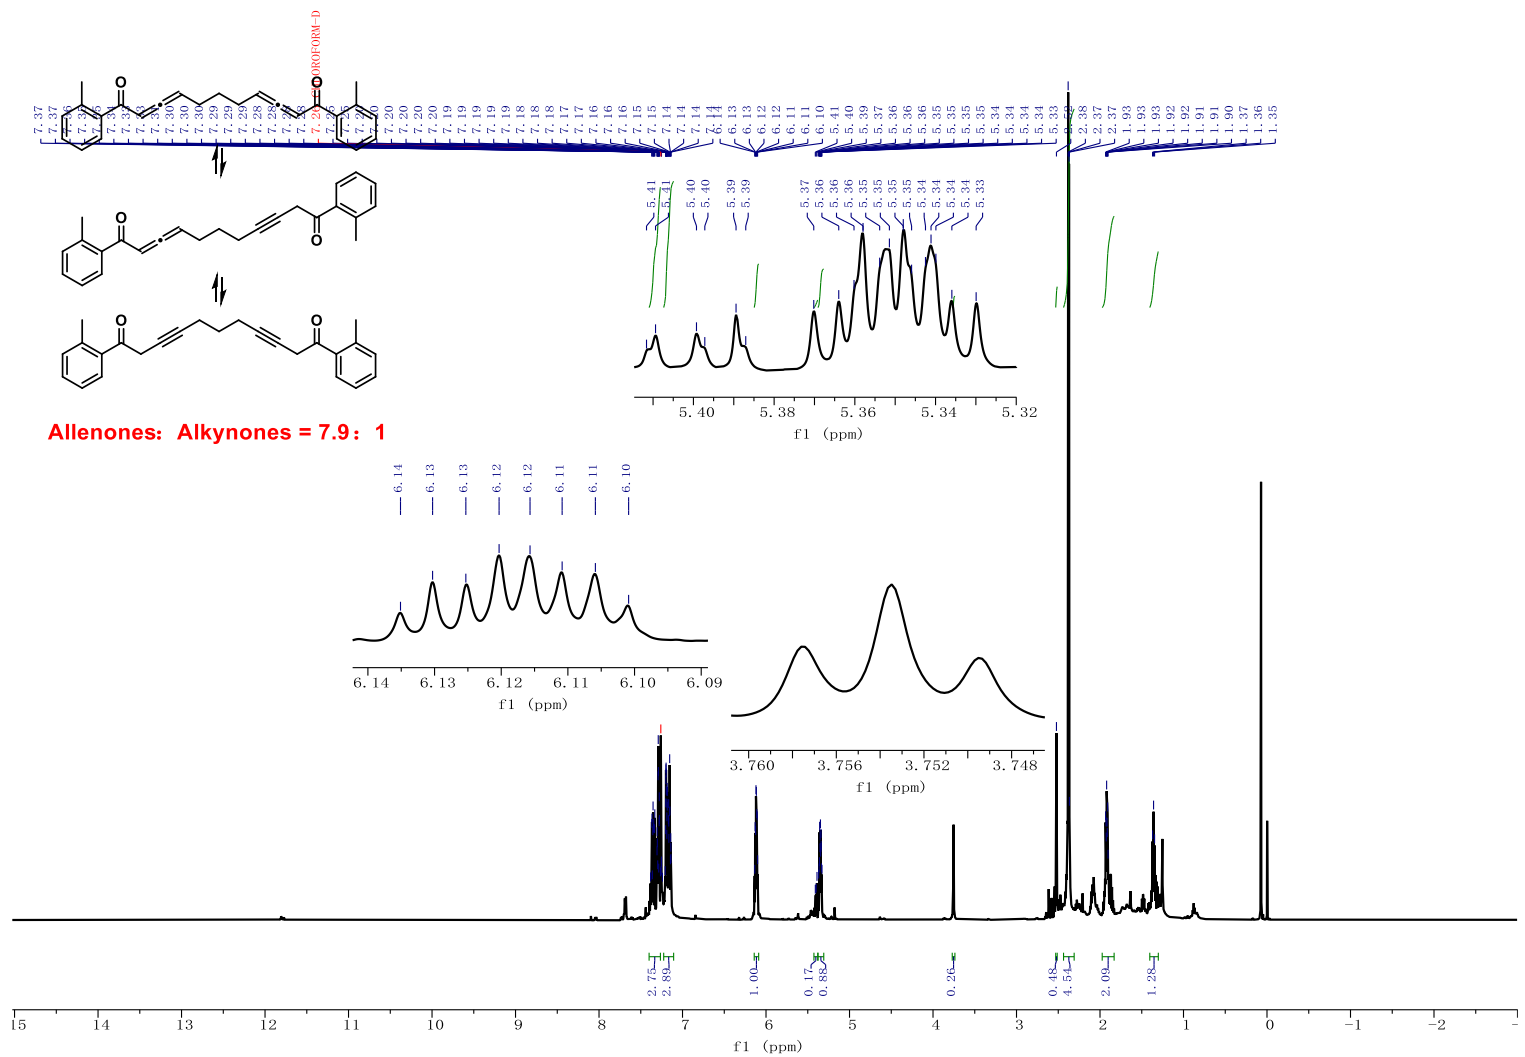

$^{13}\text{C}$  NMR (151 MHz,  $\text{CDCl}_3$ ) of **3h**

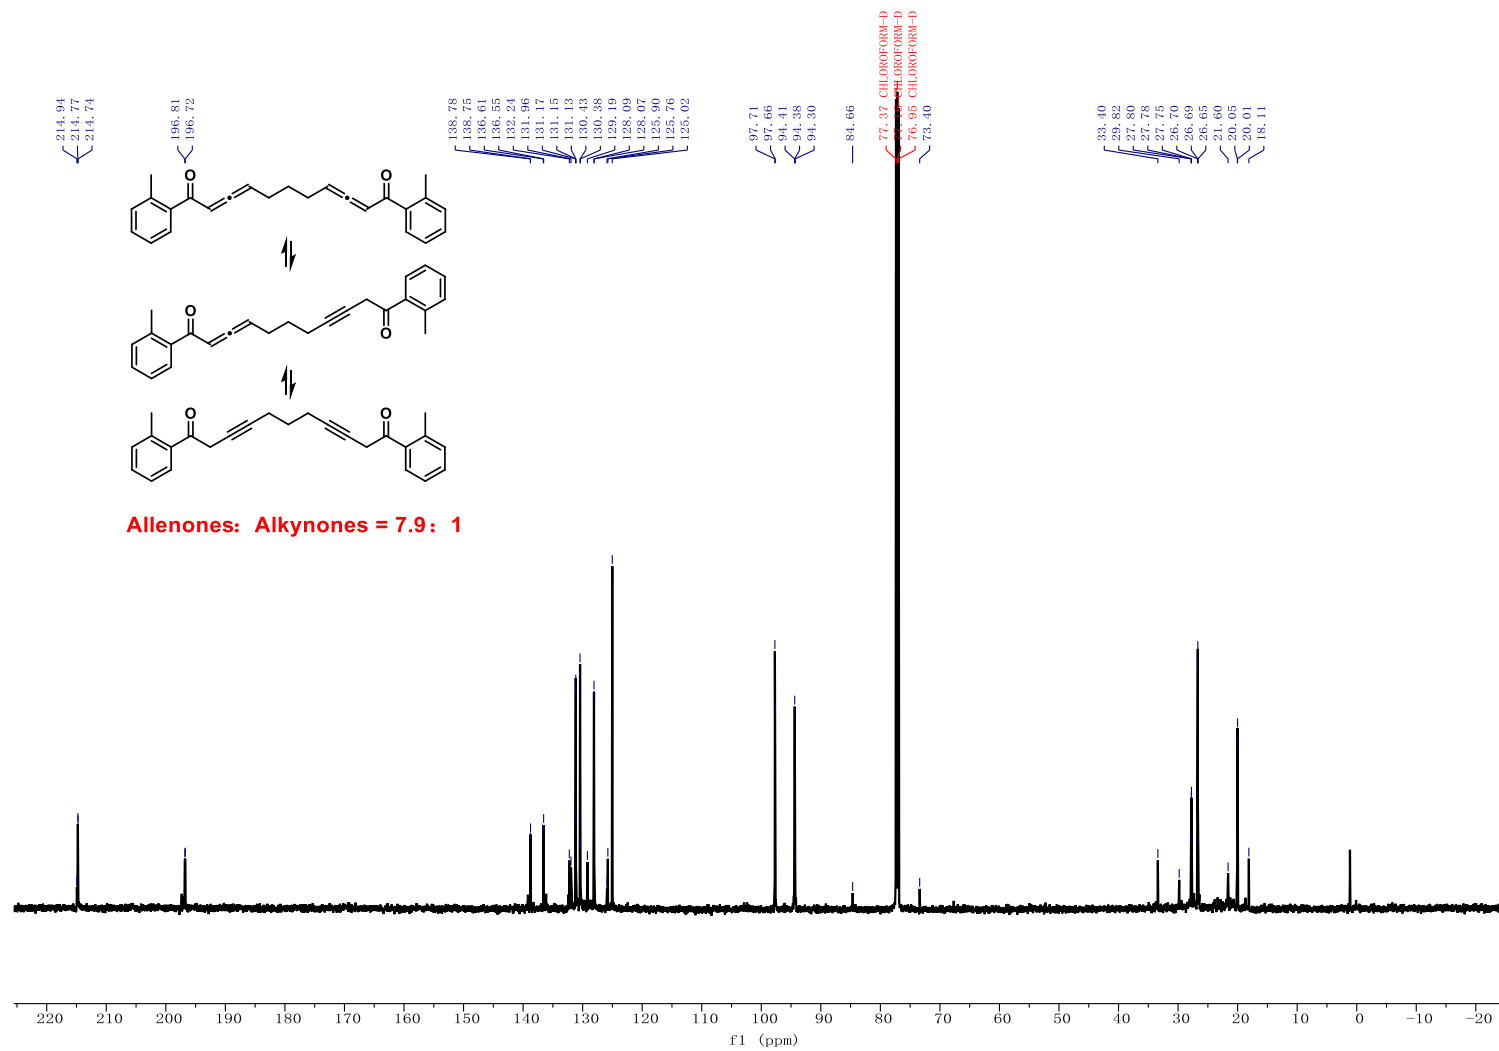

<sup>1</sup>H NMR (600 MHz, CDCl<sub>3</sub>) of **3i**

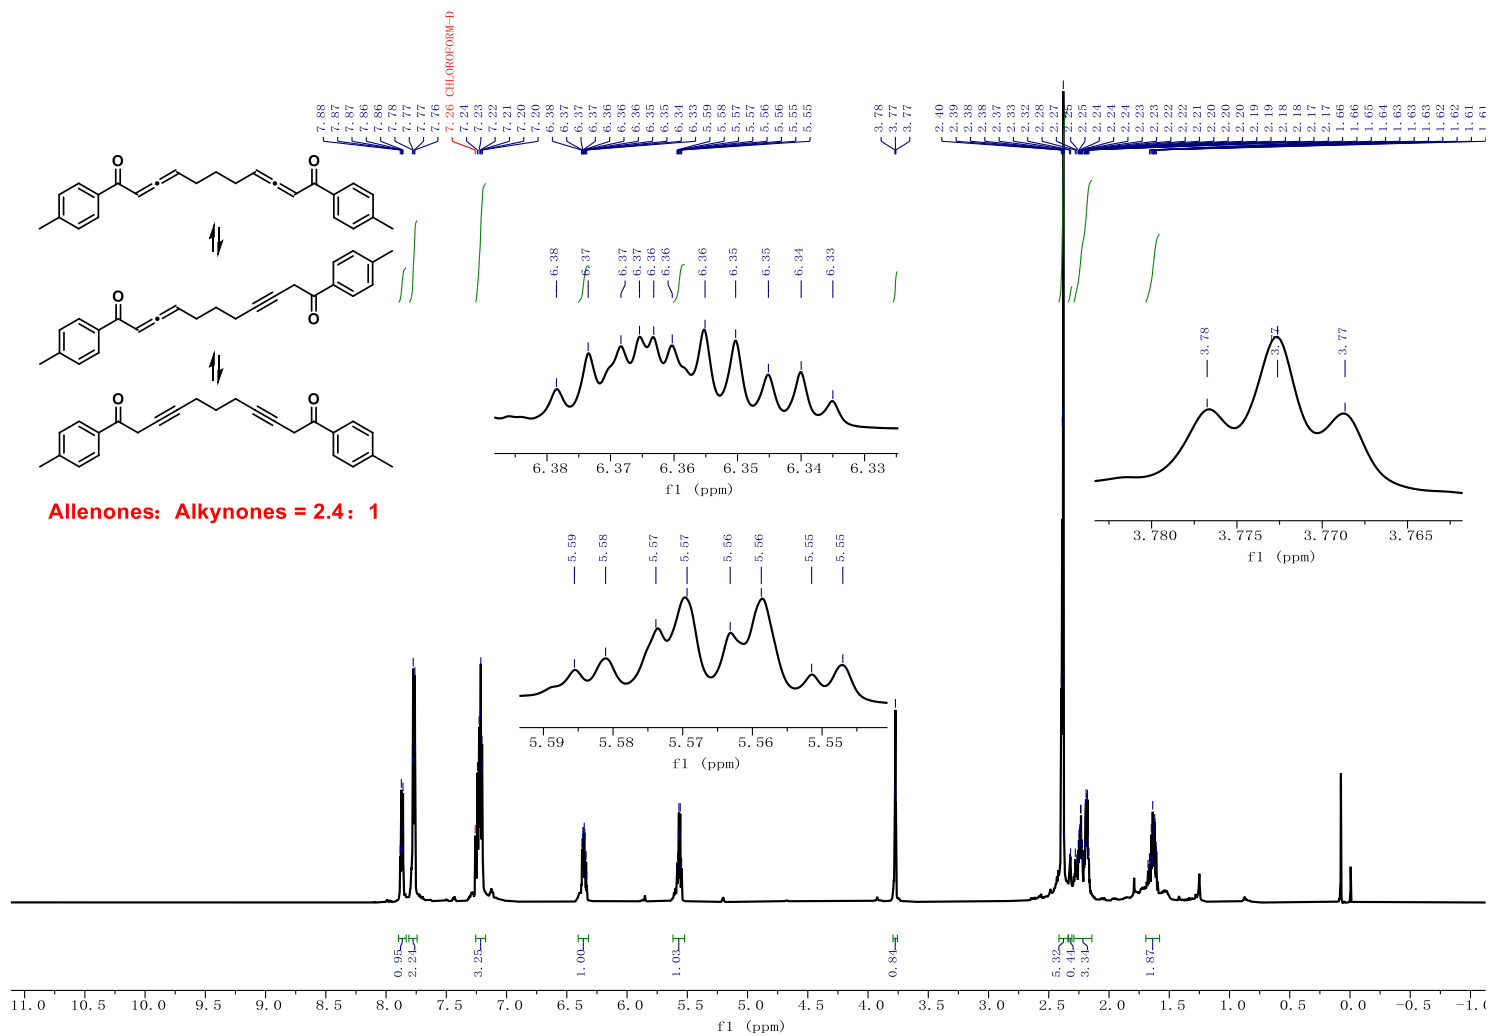

<sup>13</sup>C NMR (151 MHz, CDCl<sub>3</sub>) of **3i**

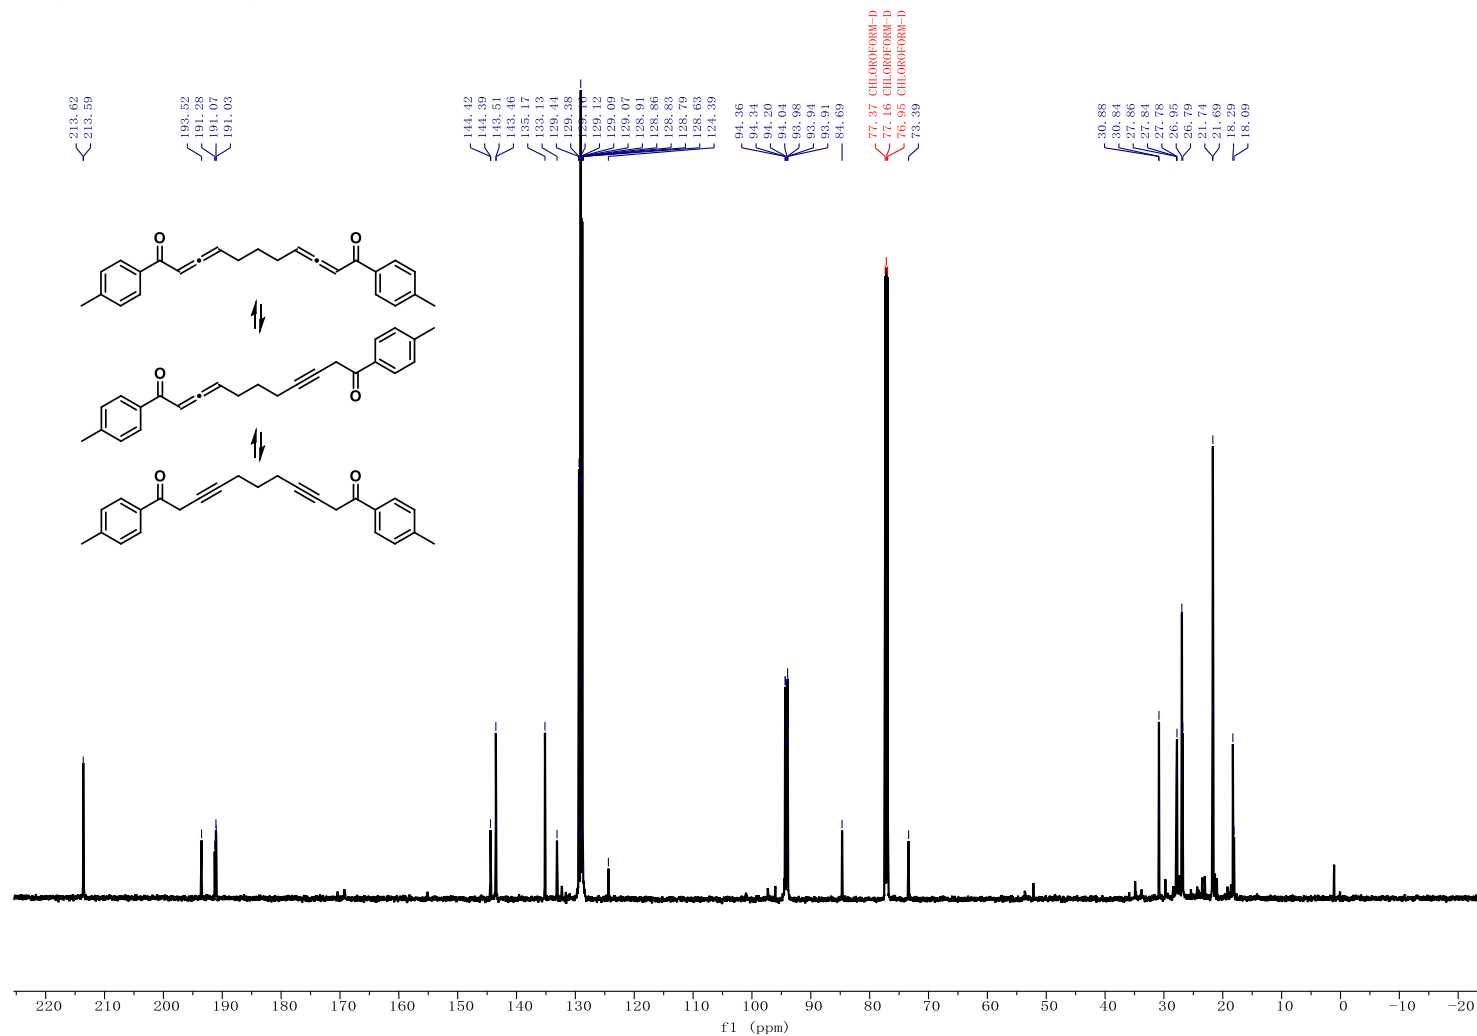

<sup>1</sup>H NMR (600 MHz, CDCl<sub>3</sub>) of **3j**

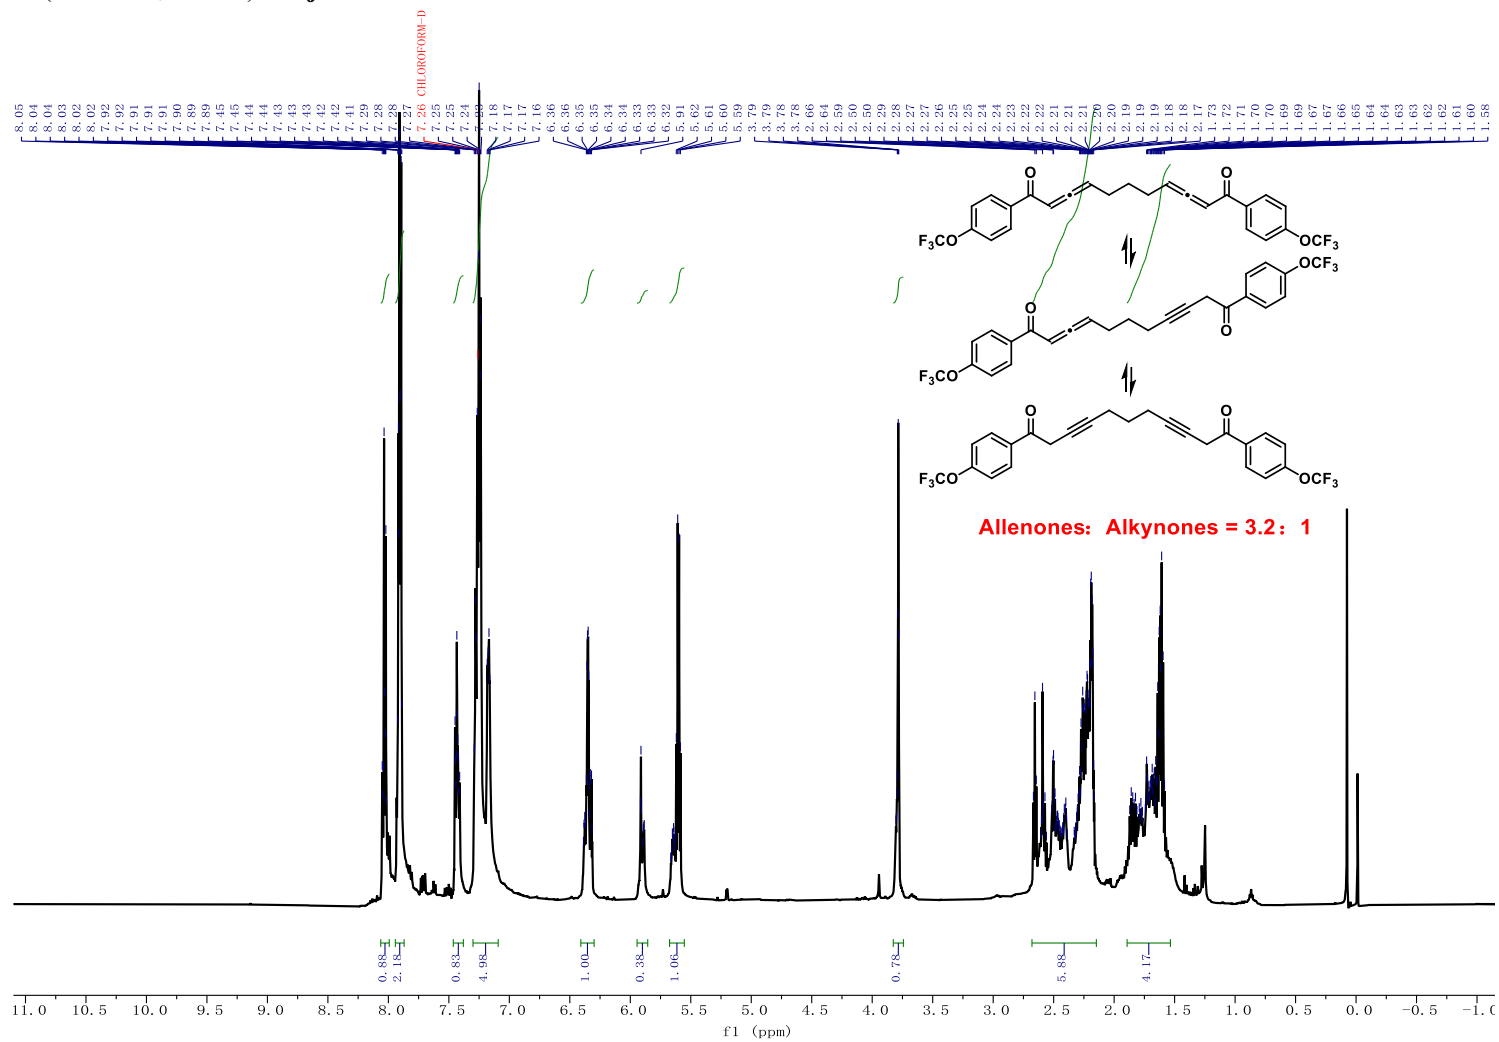



<sup>13</sup>C NMR (151 MHz, CDCl<sub>3</sub>) of **3j**

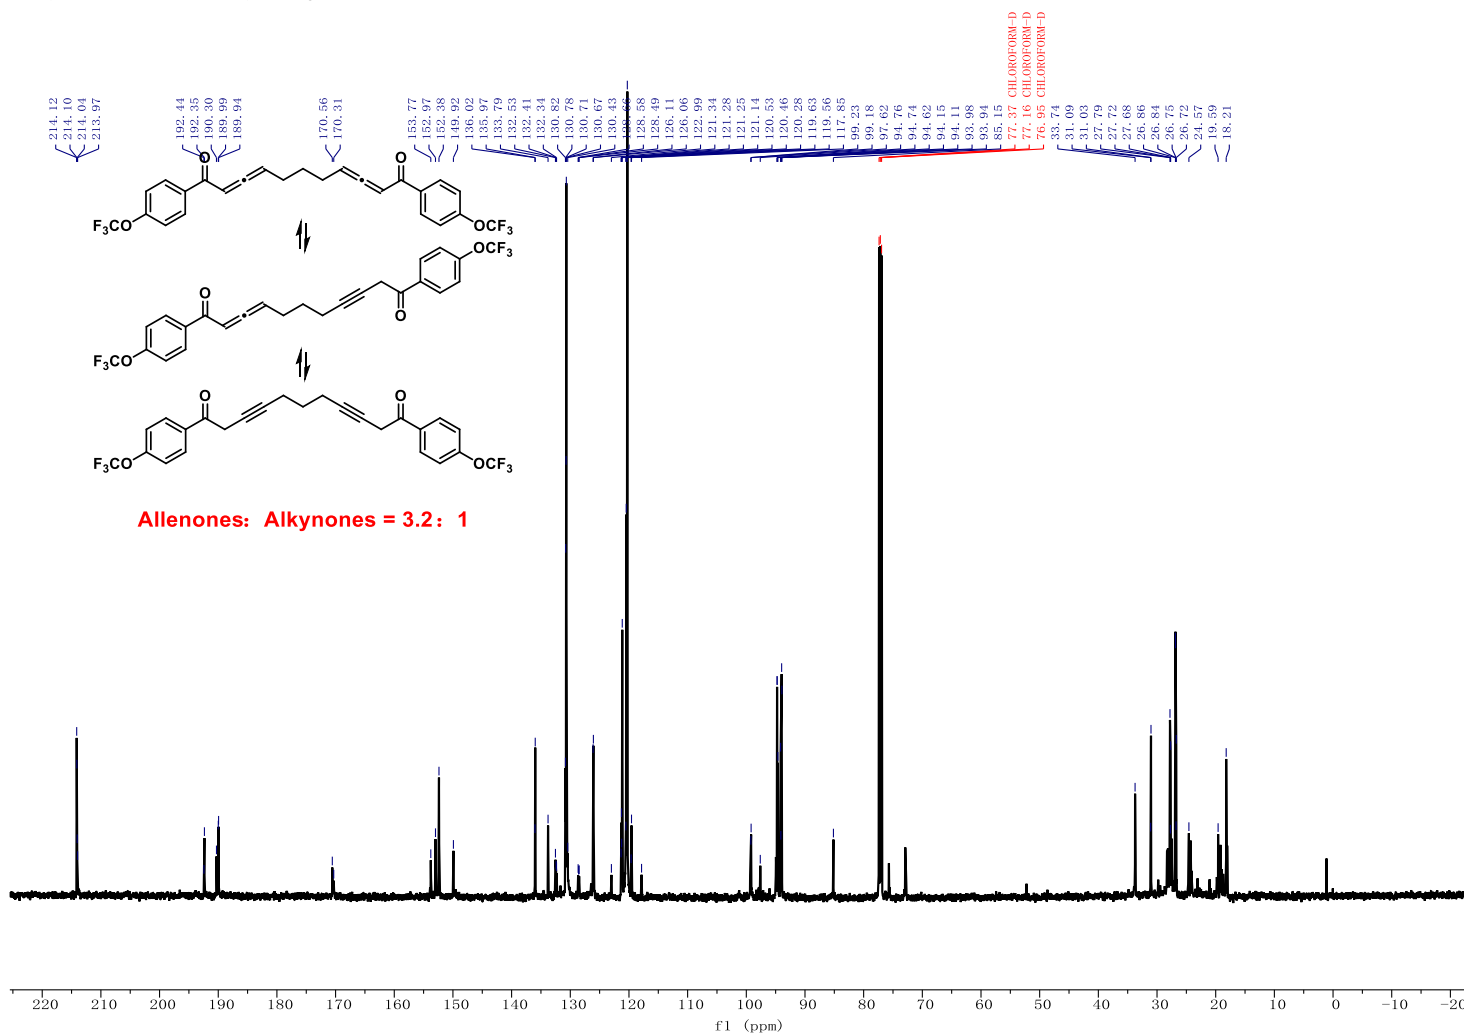

$^1\text{H}$  NMR (600 MHz,  $\text{CDCl}_3$ ) of **3k**

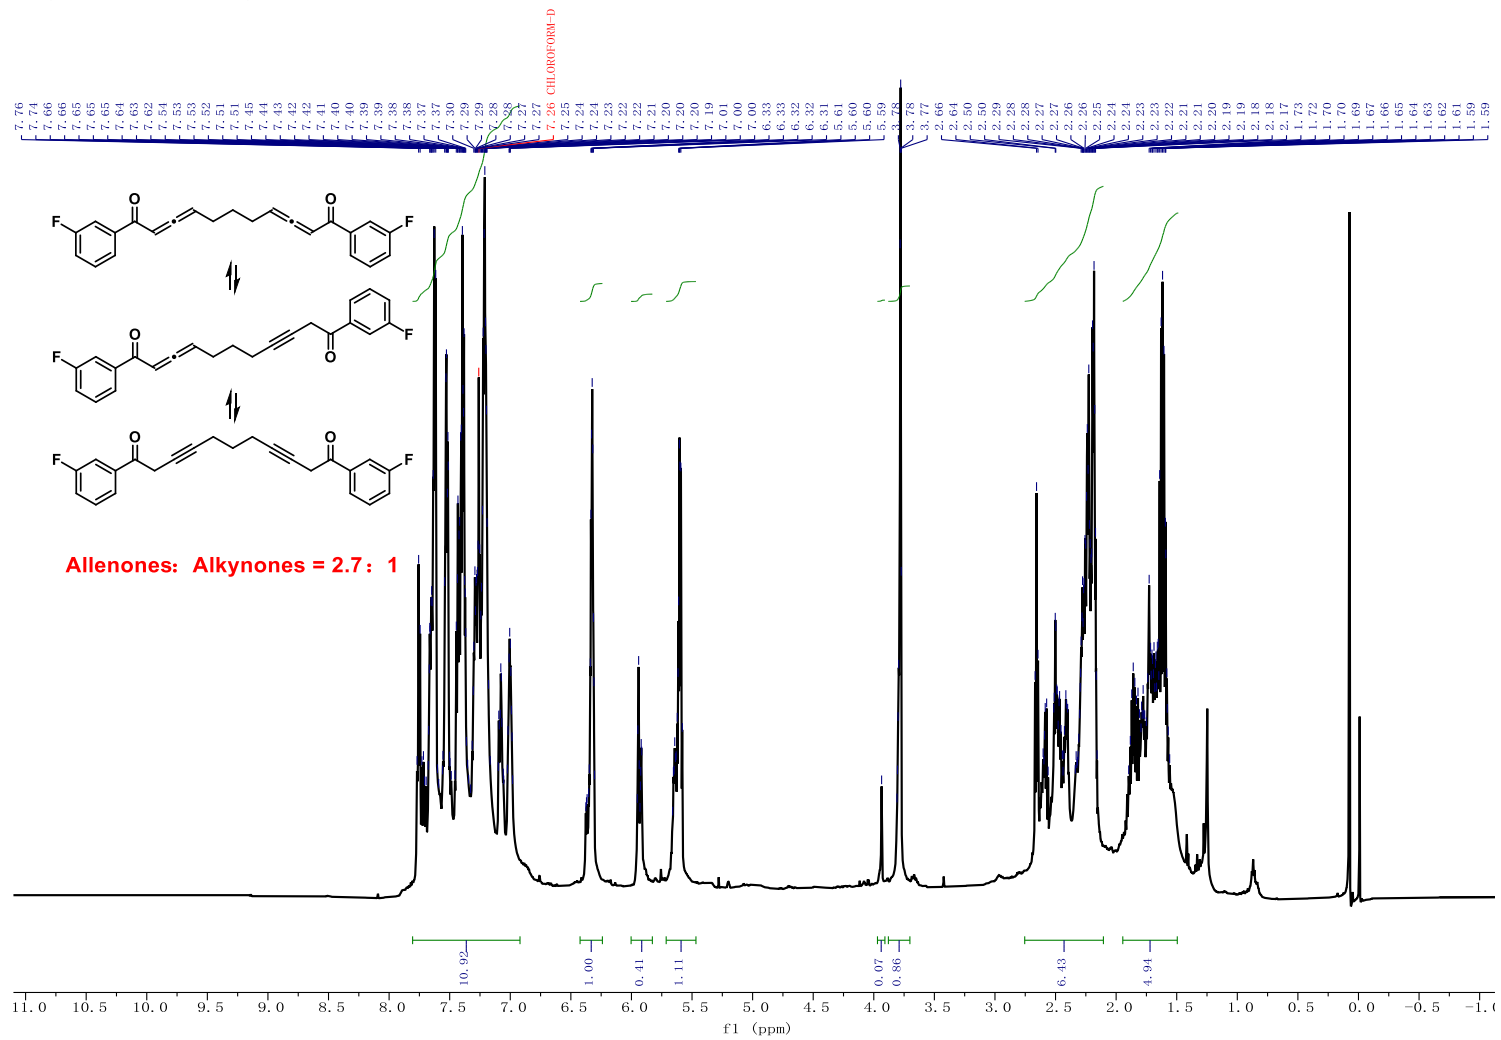

<sup>13</sup>C NMR (151 MHz, CDCl<sub>3</sub>) of **3k**

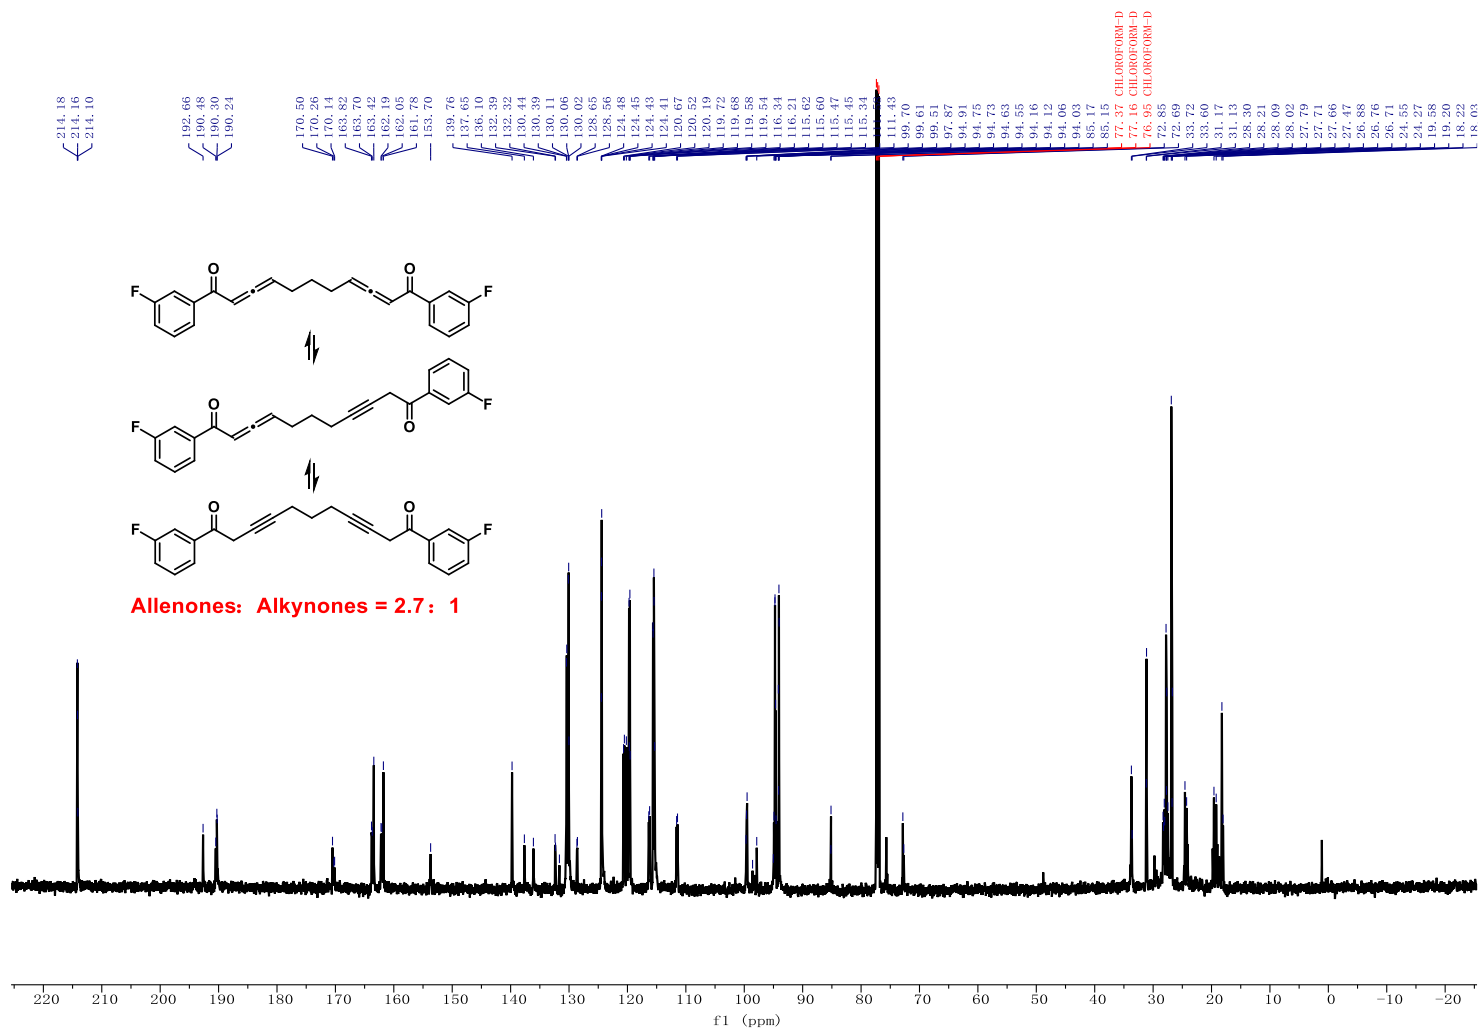

<sup>1</sup>H NMR (600 MHz, CDCl<sub>3</sub>) of **3I**

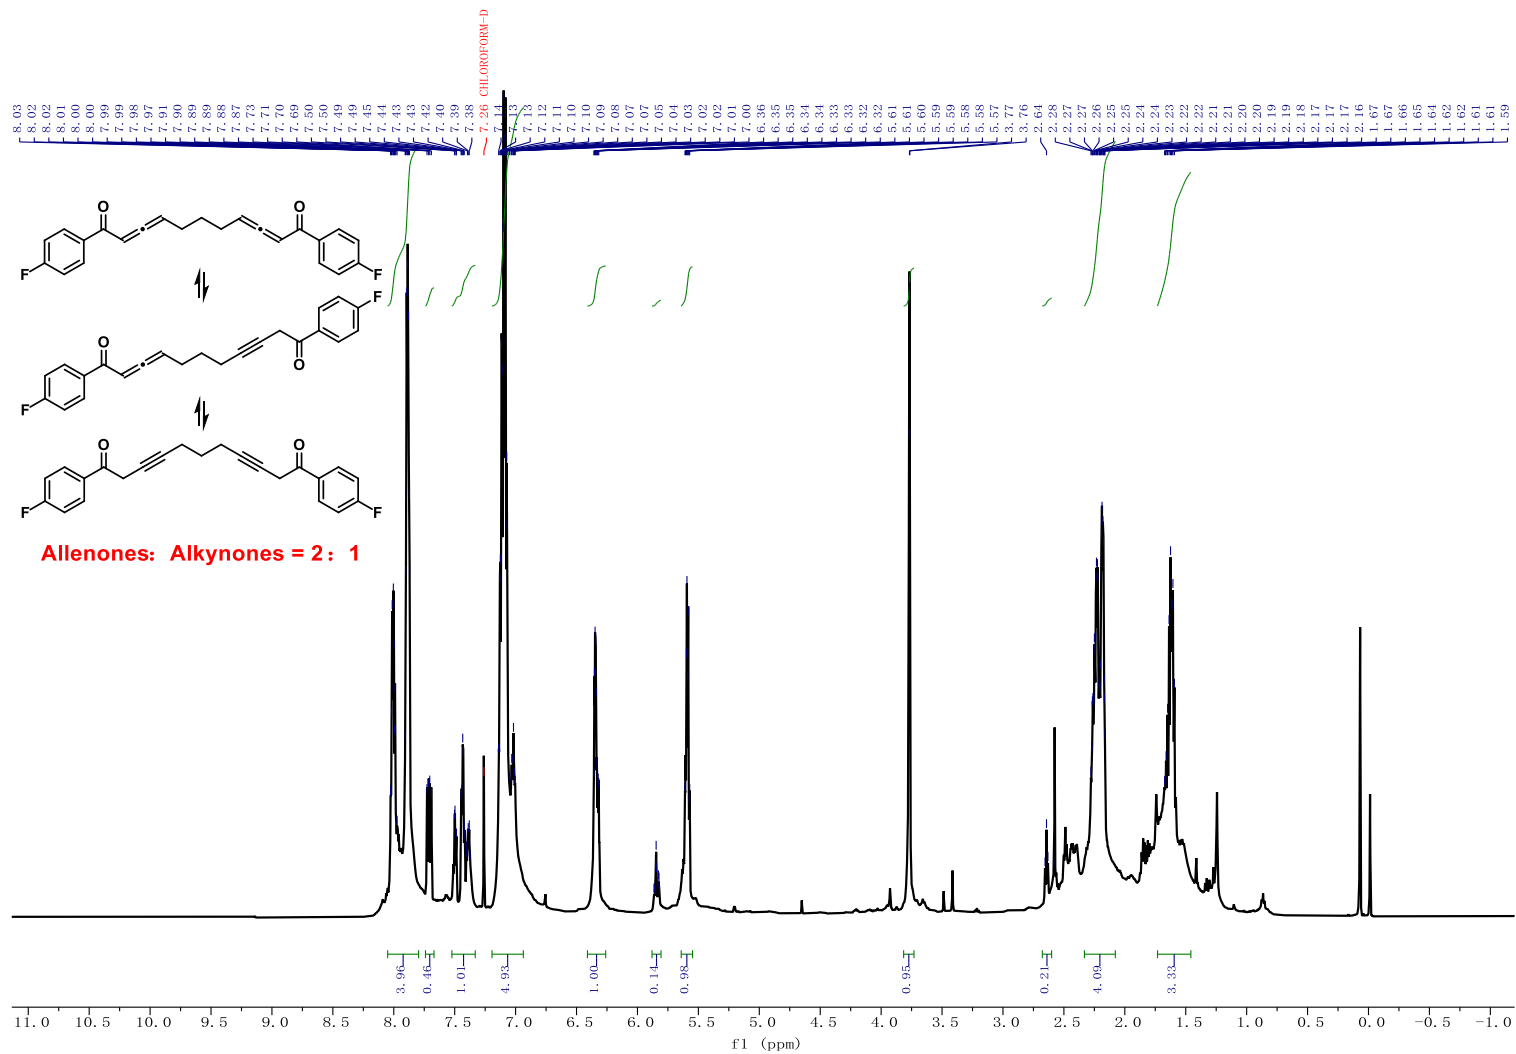

$^{13}\text{C}$  NMR (151 MHz,  $\text{CDCl}_3$ ) of **31**

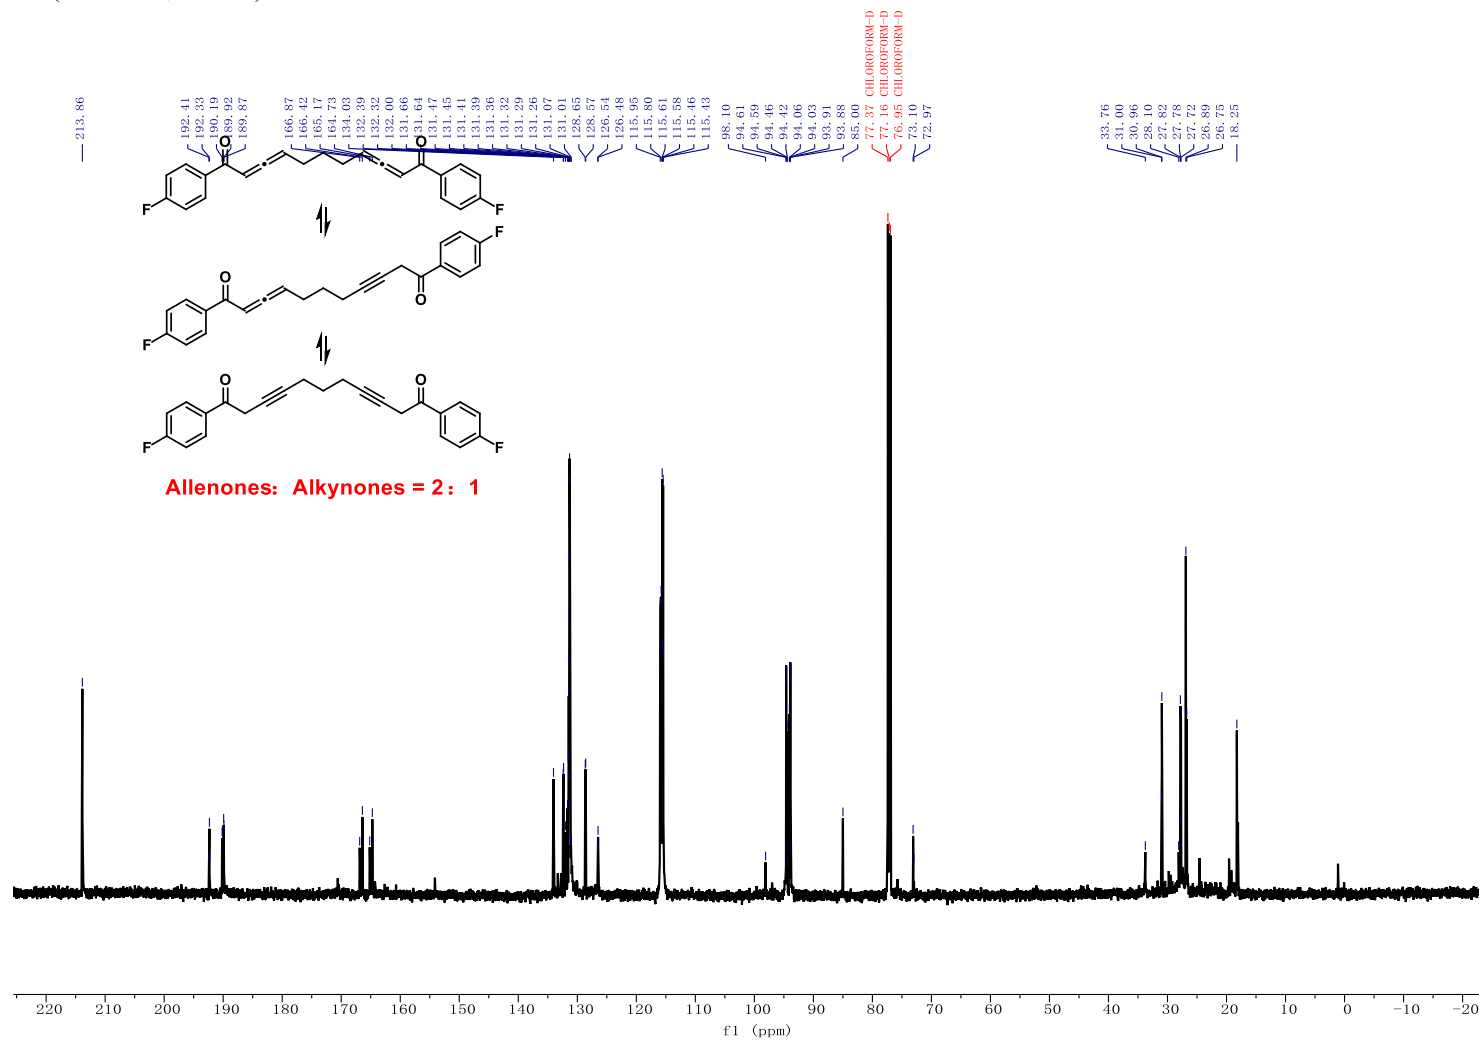

<sup>1</sup>H NMR (600 MHz, CDCl<sub>3</sub>) of **3m**

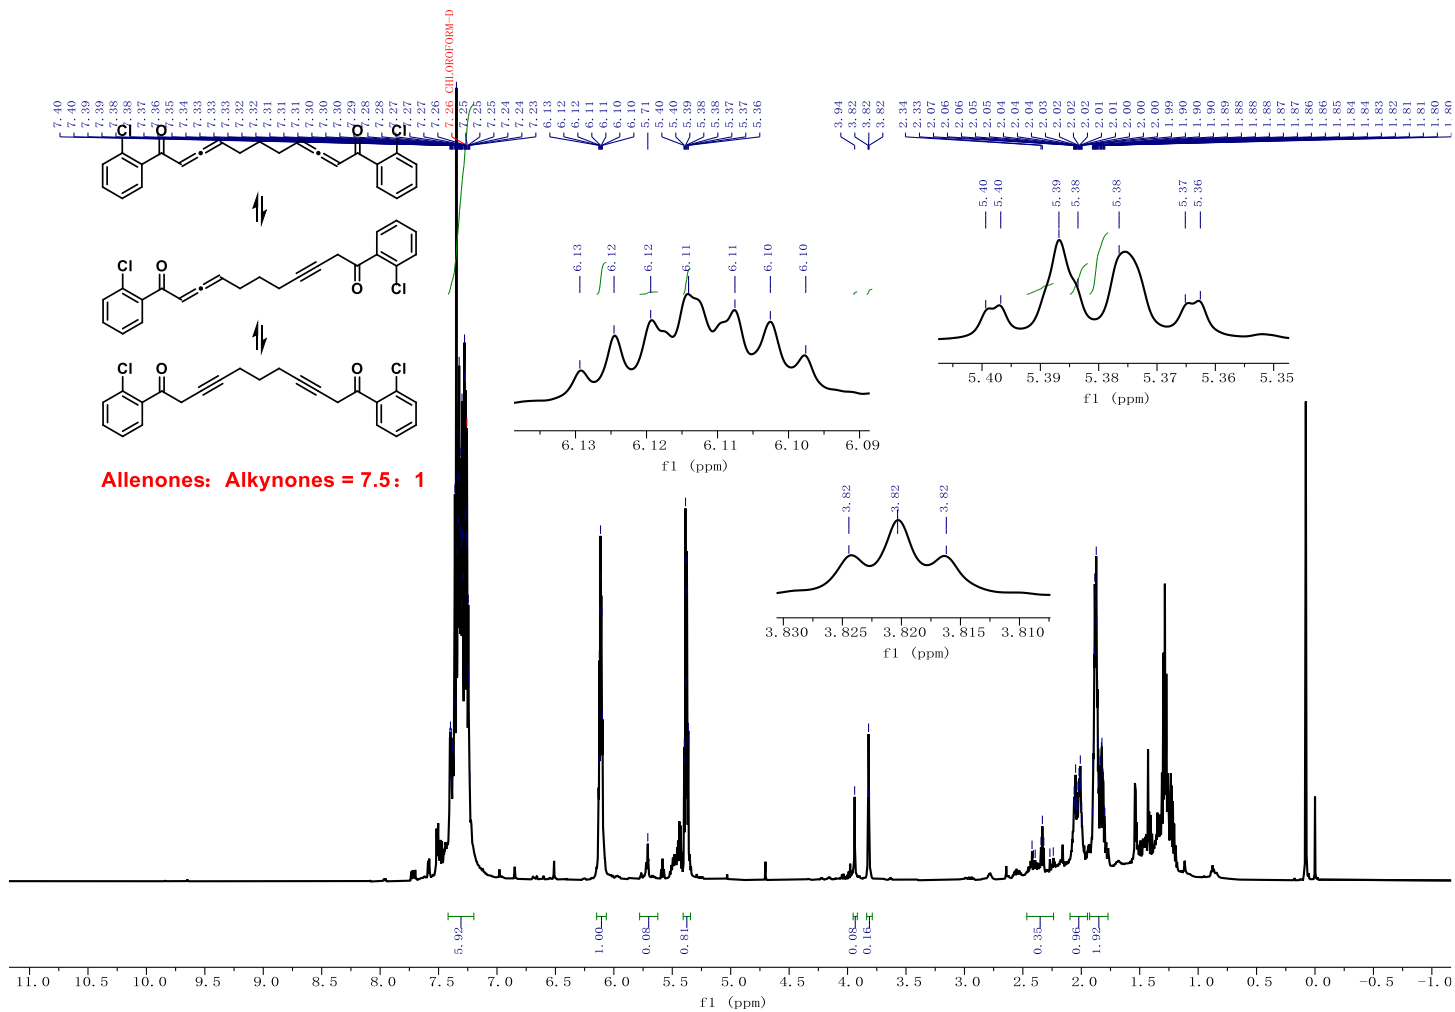

$^{13}\text{C}$  NMR (151 MHz,  $\text{CDCl}_3$ ) of **3m**

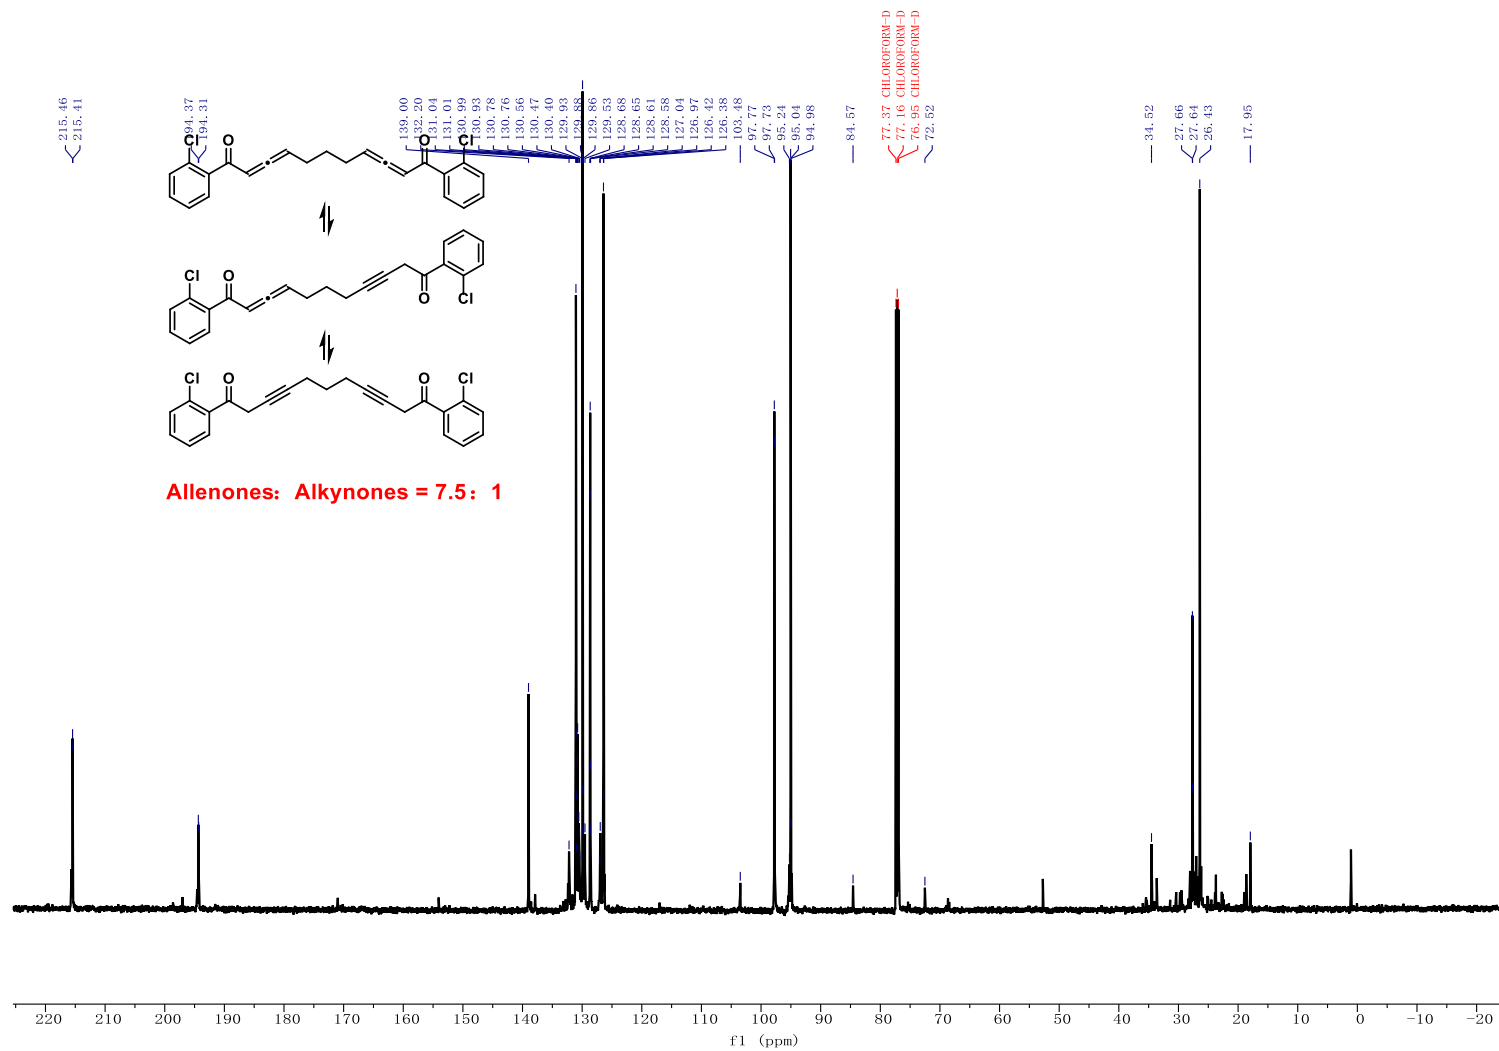

<sup>1</sup>H NMR (600 MHz, CDCl<sub>3</sub>) of **3n**

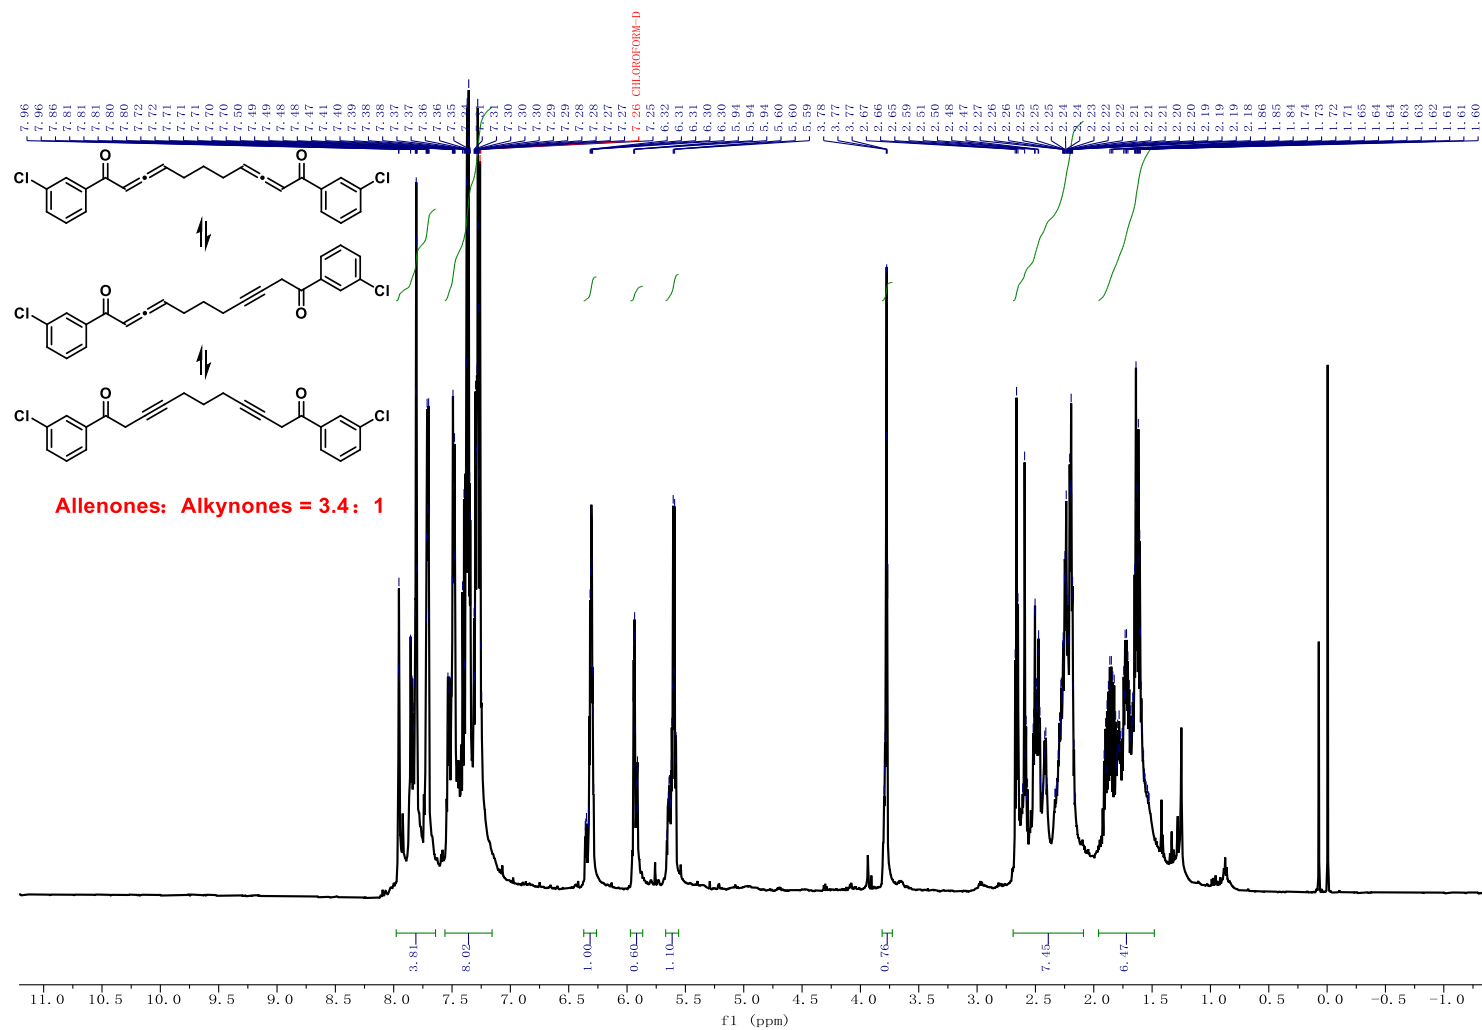



$^{13}\text{C}$  NMR (151 MHz,  $\text{CDCl}_3$ ) of **3n**

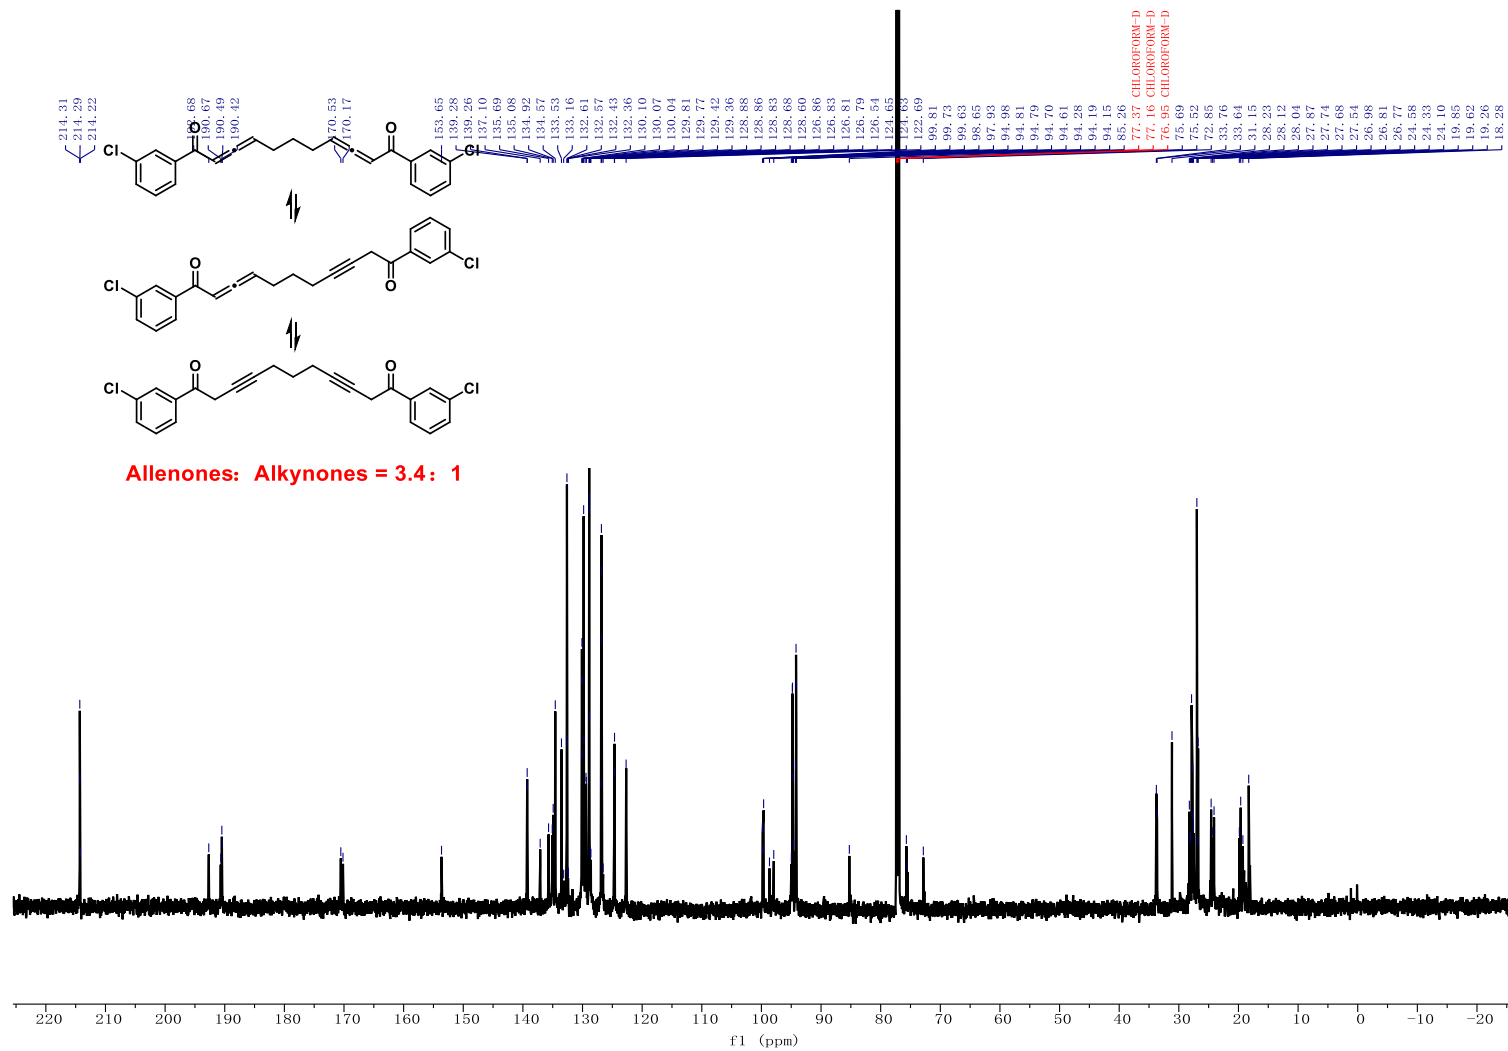

<sup>1</sup>H NMR (600 MHz, CDCl<sub>3</sub>) of **3o**

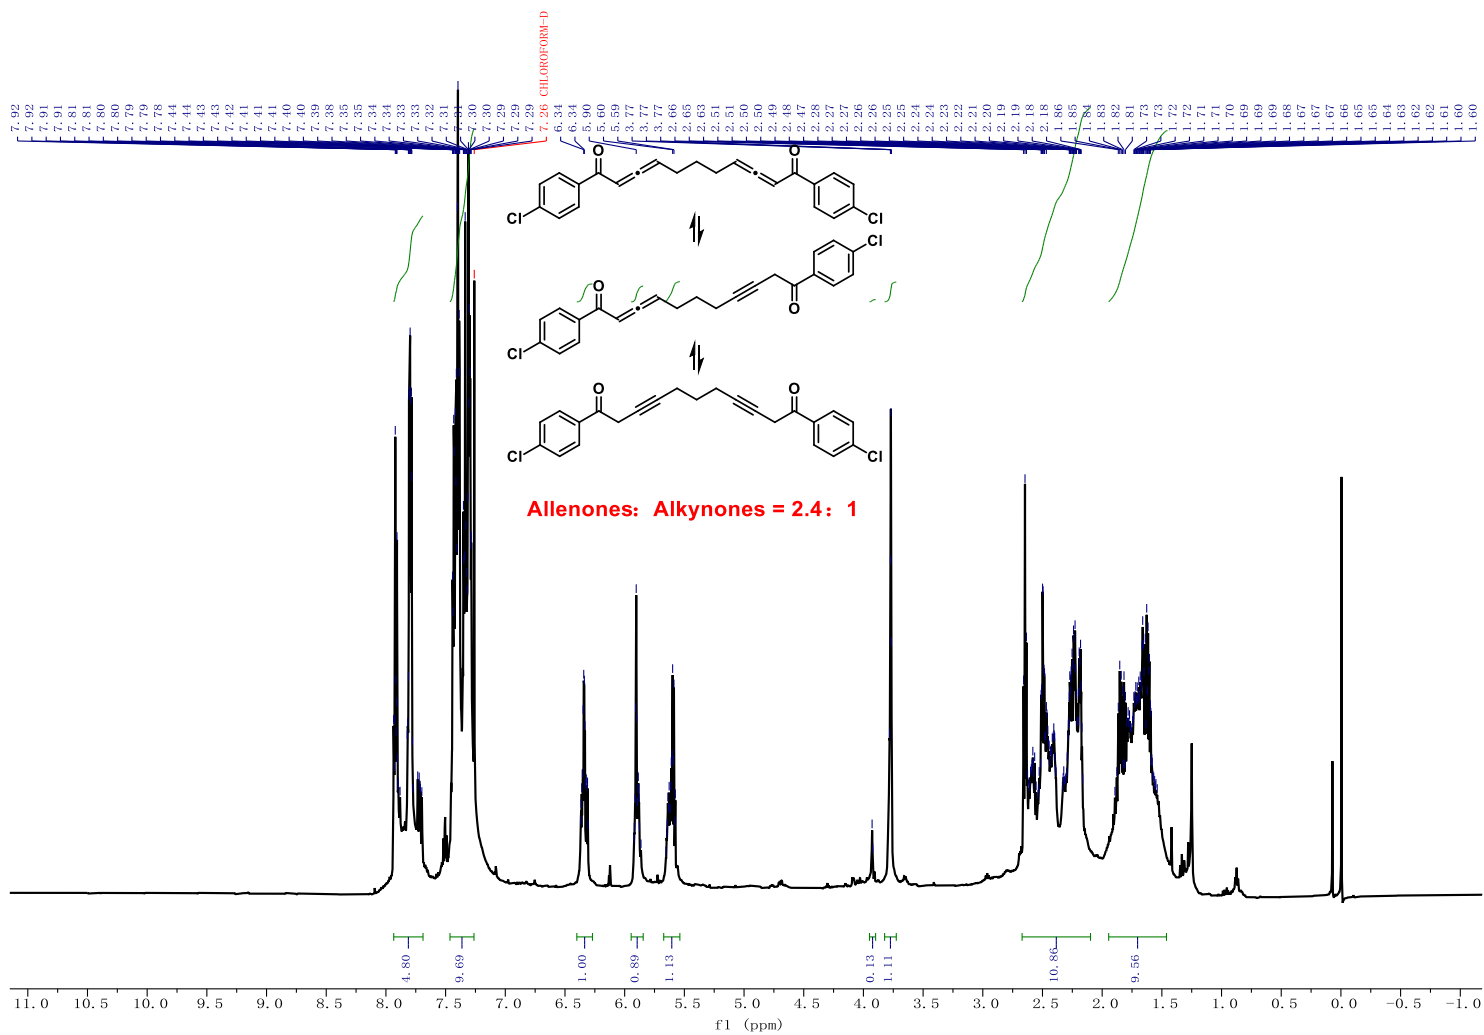

$^{13}\text{C}$  NMR (151 MHz,  $\text{CDCl}_3$ ) of **3o**

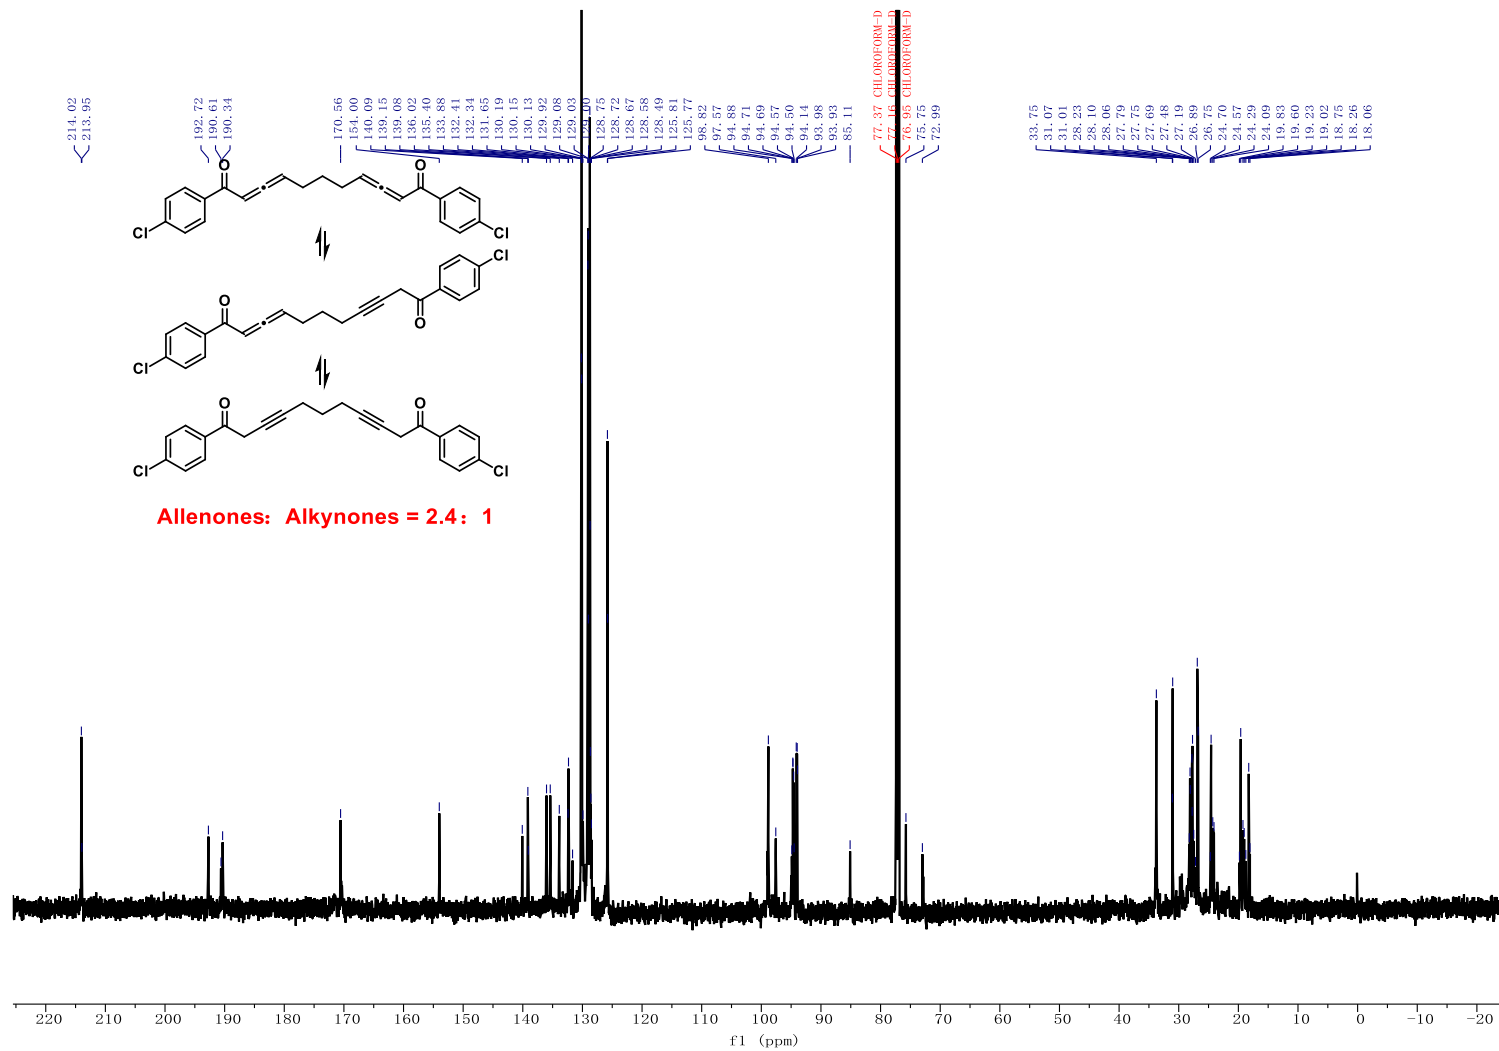

Allenes: Alkynes = 2.4: 1

<sup>1</sup>H NMR (600 MHz, CDCl<sub>3</sub>) of **3p**

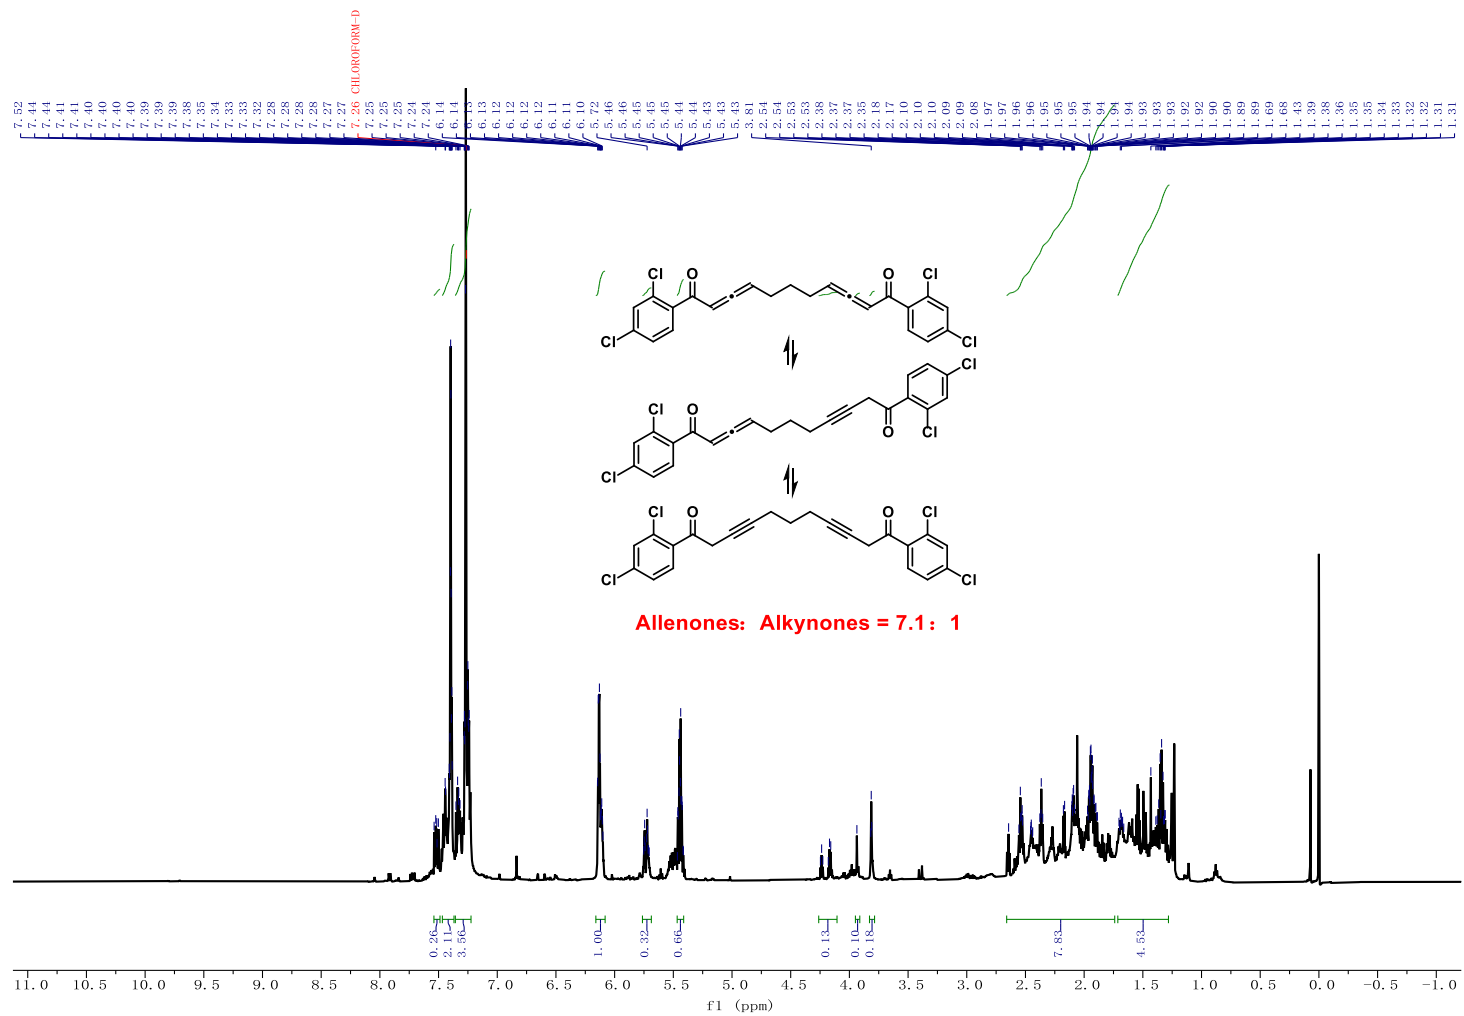

$^{13}\text{C}$  NMR (151 MHz,  $\text{CDCl}_3$ ) of **3p**

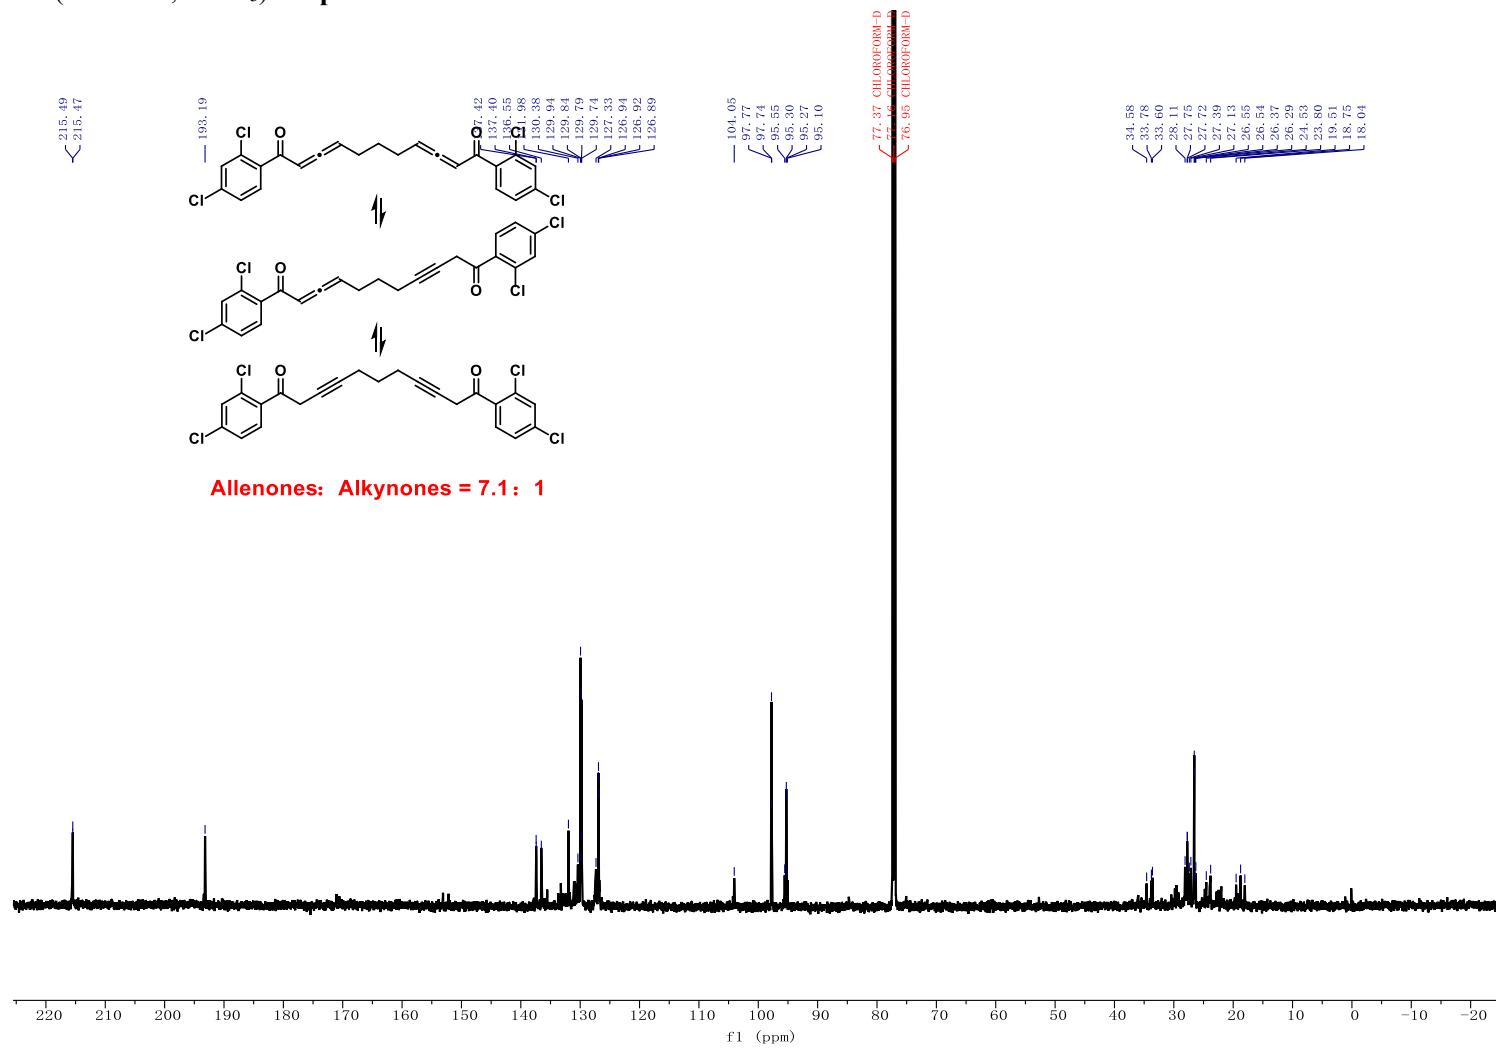

<sup>1</sup>H NMR (600 MHz, CDCl<sub>3</sub>) of **3q**

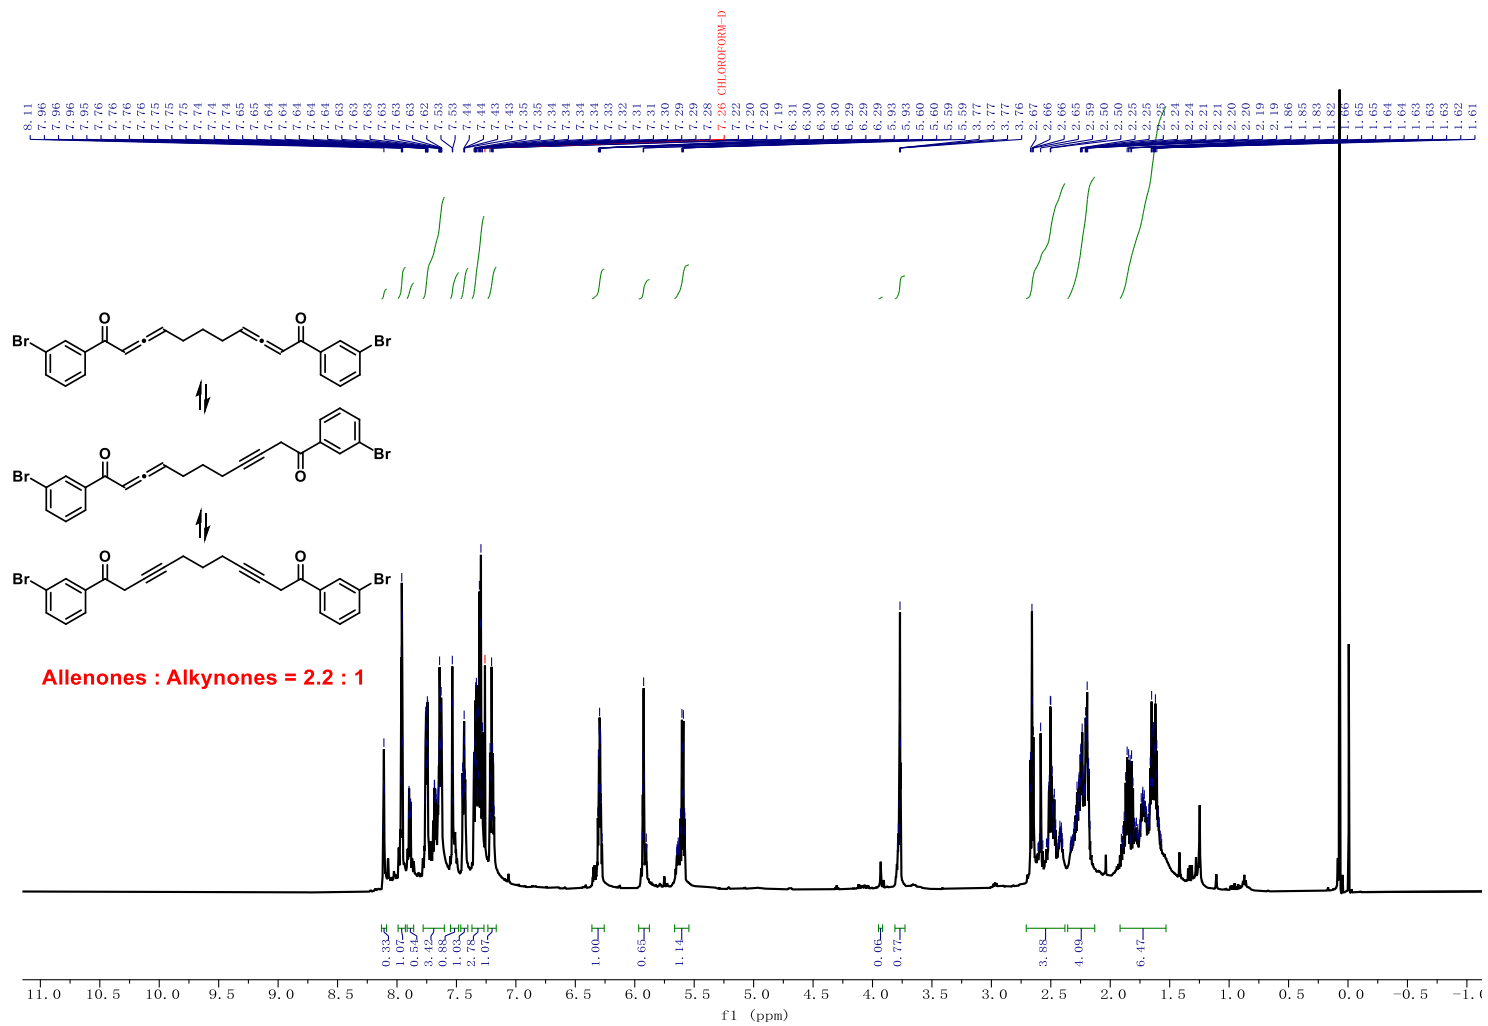

<sup>13</sup>C NMR (151 MHz, CDCl<sub>3</sub>) of **3q**

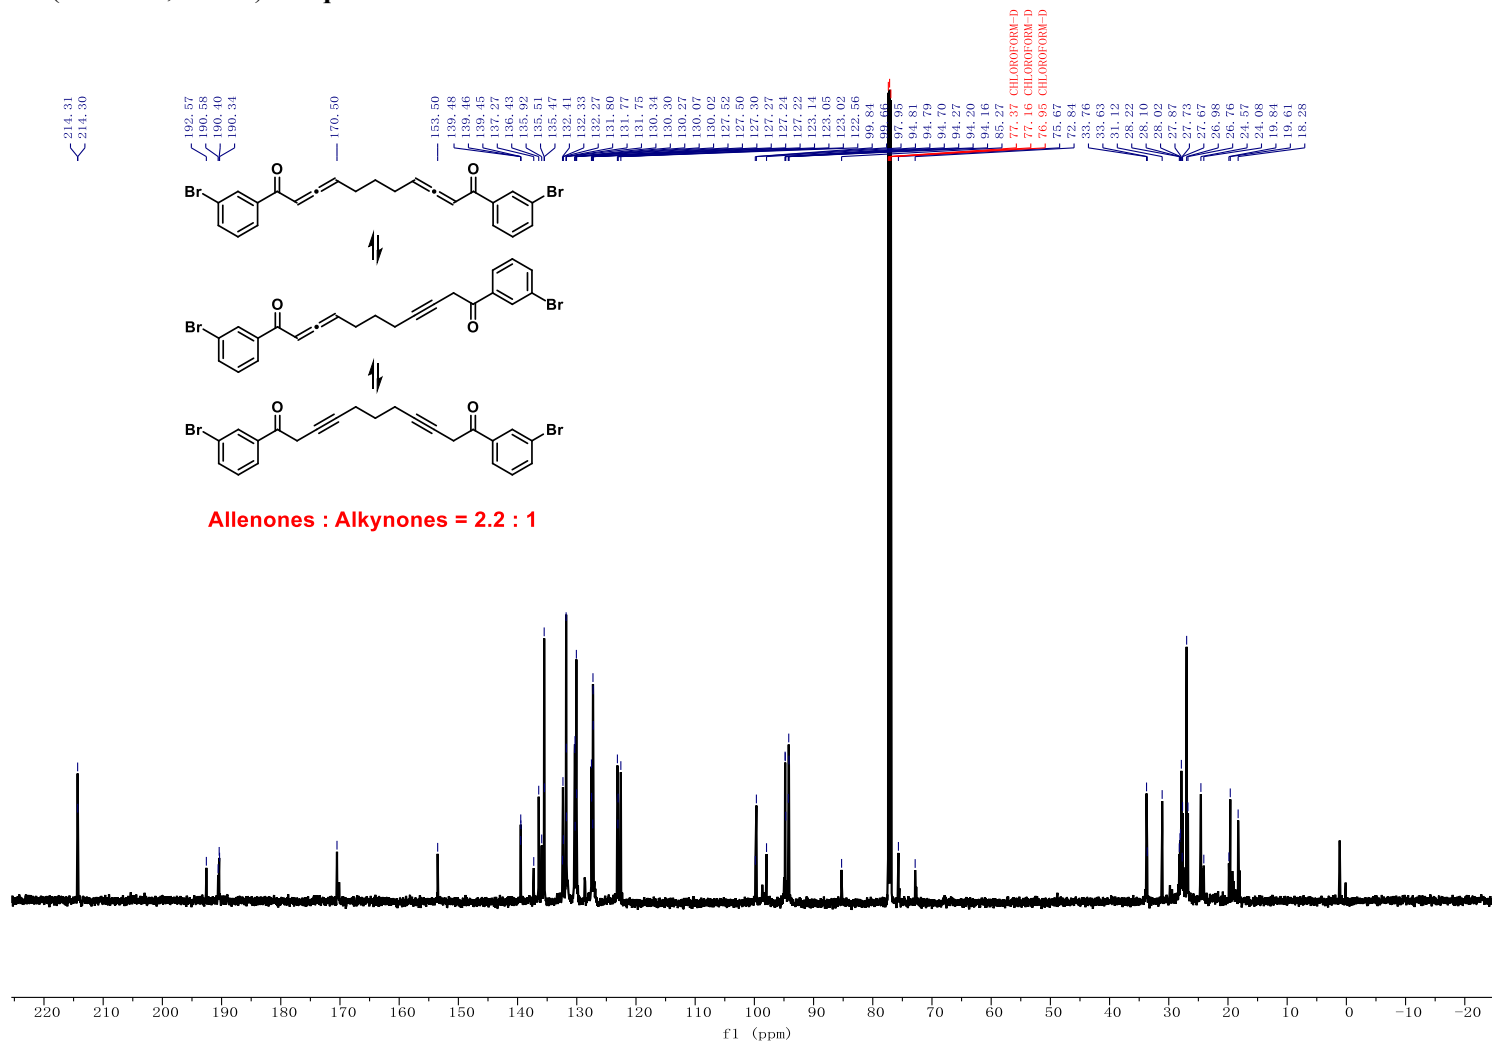

$^1\text{H}$  NMR (600 MHz,  $\text{CDCl}_3$ ) of **3r**

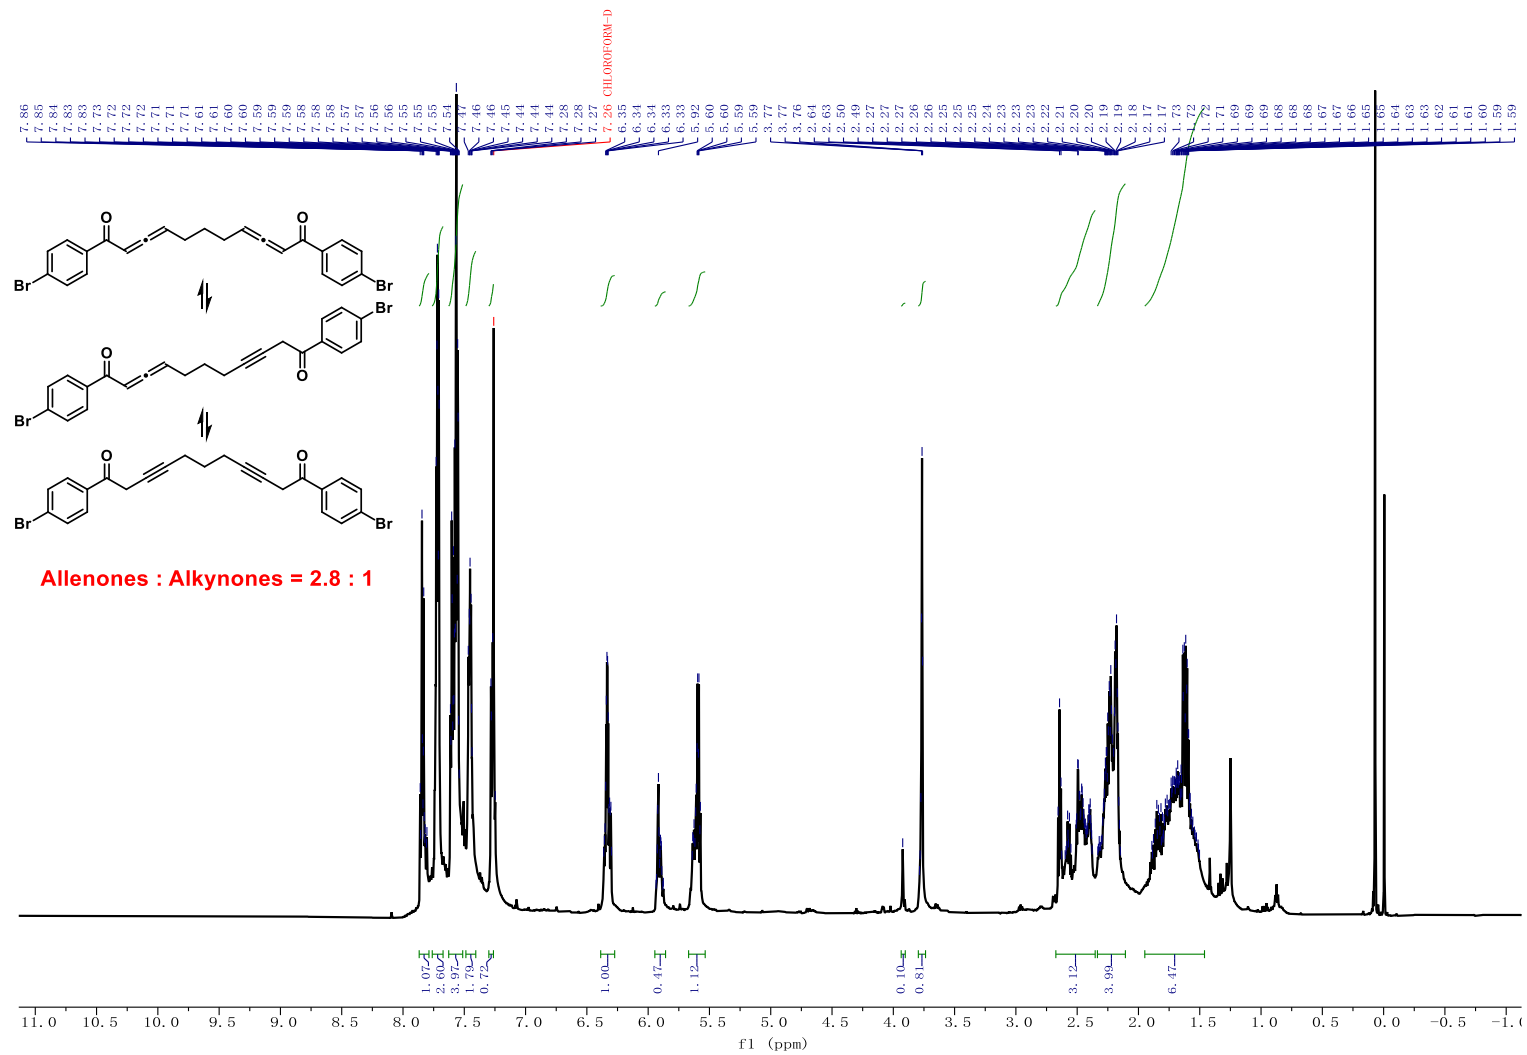



$^{13}\text{C}$  NMR (151 MHz,  $\text{CDCl}_3$ ) of **3r**

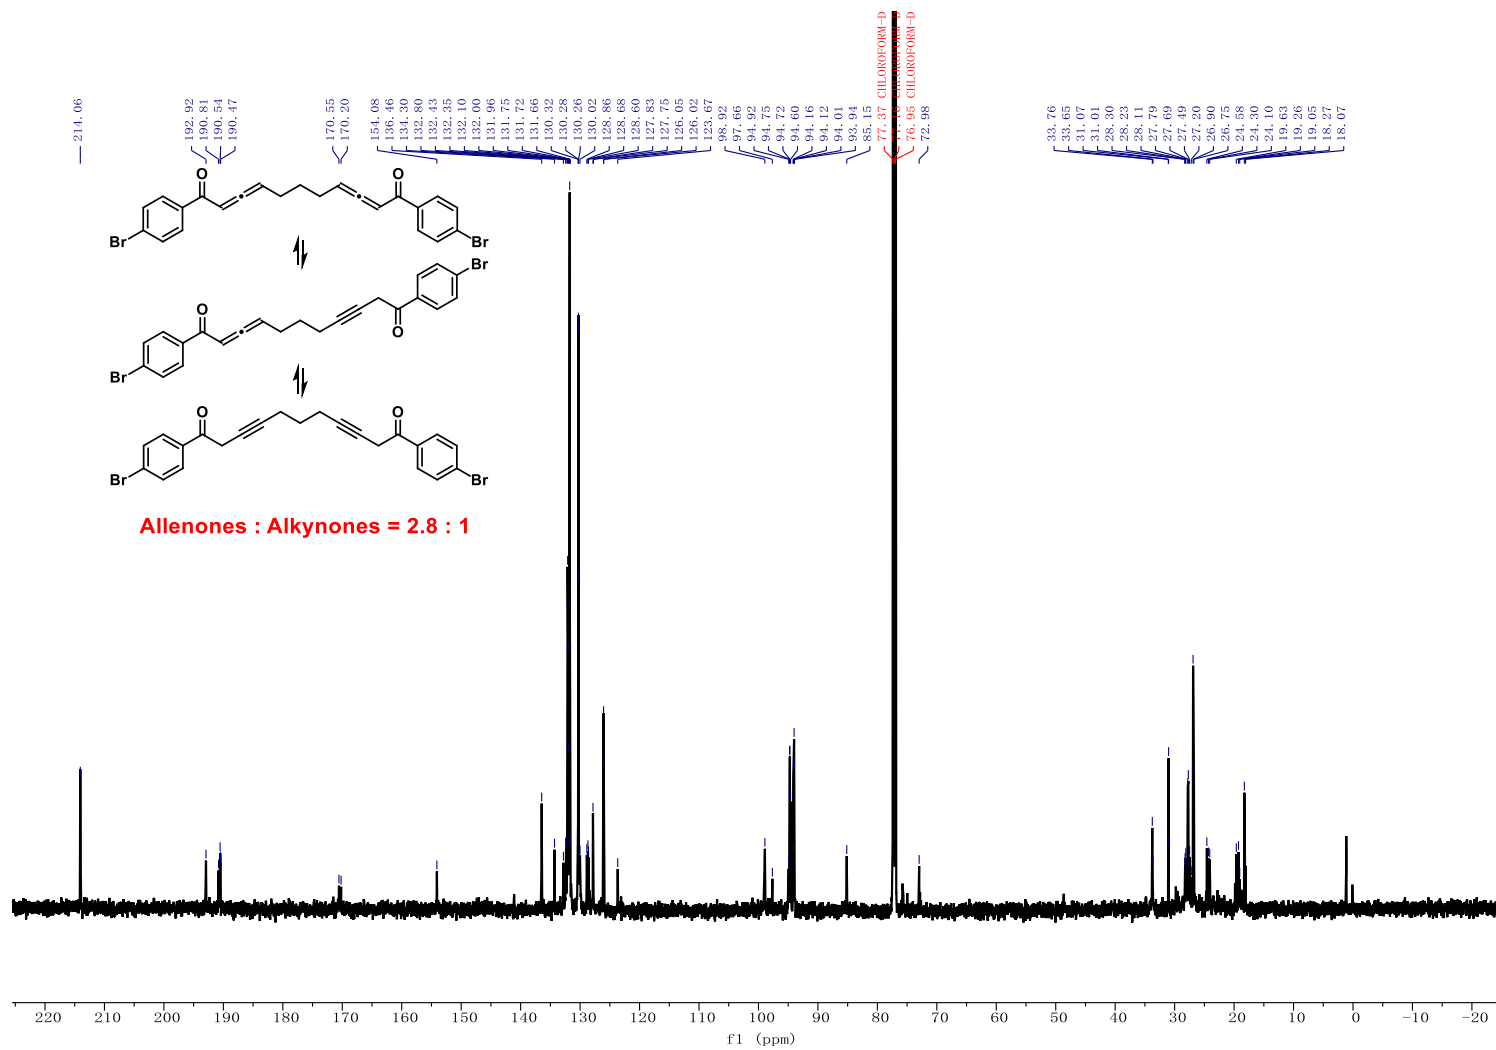

Allenones : Alkynones = 2.8 : 1

<sup>1</sup>H NMR (600 MHz, CDCl<sub>3</sub>) of **3s**

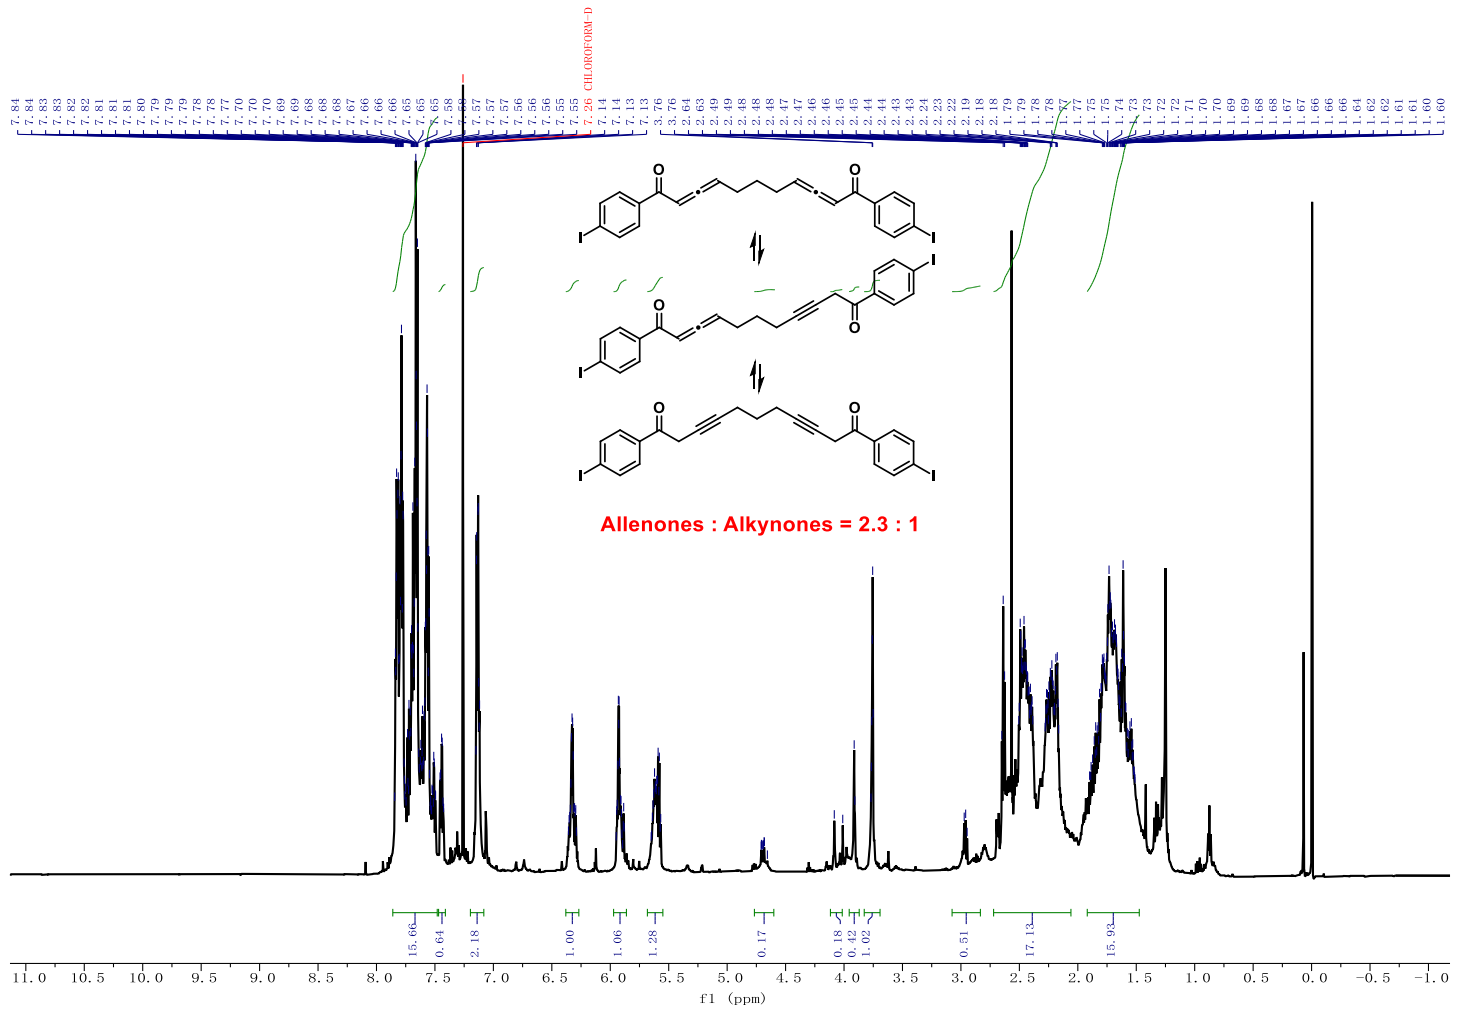

$^{13}\text{C}$  NMR (151 MHz,  $\text{CDCl}_3$ ) of **3s**

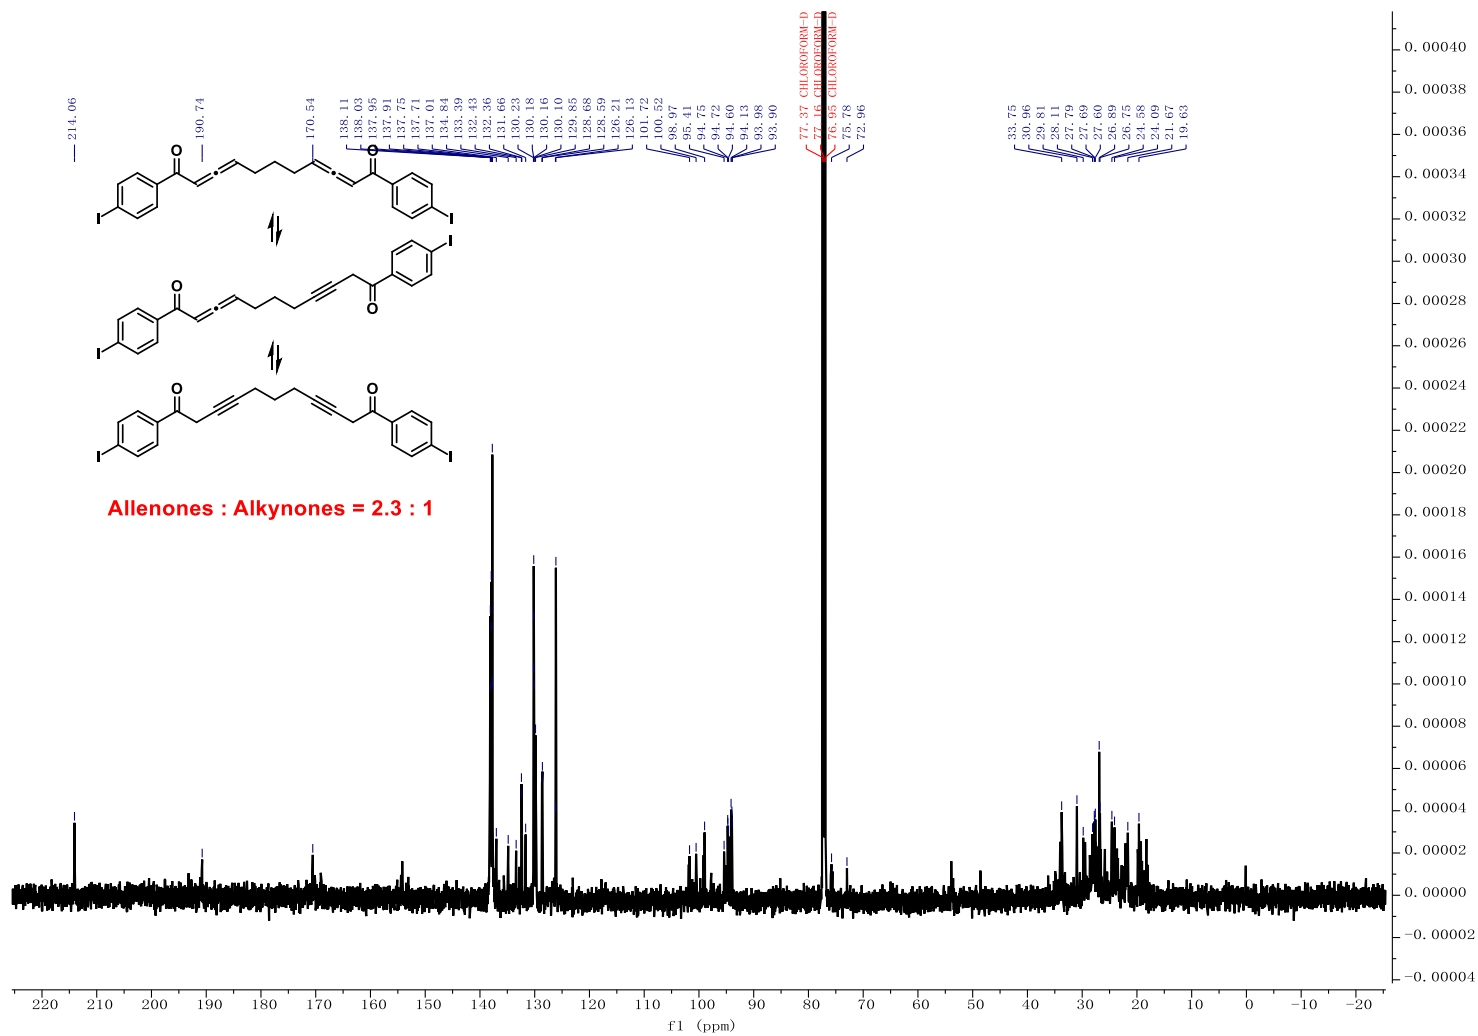

<sup>1</sup>H NMR (600 MHz, CDCl<sub>3</sub>) of **3t**

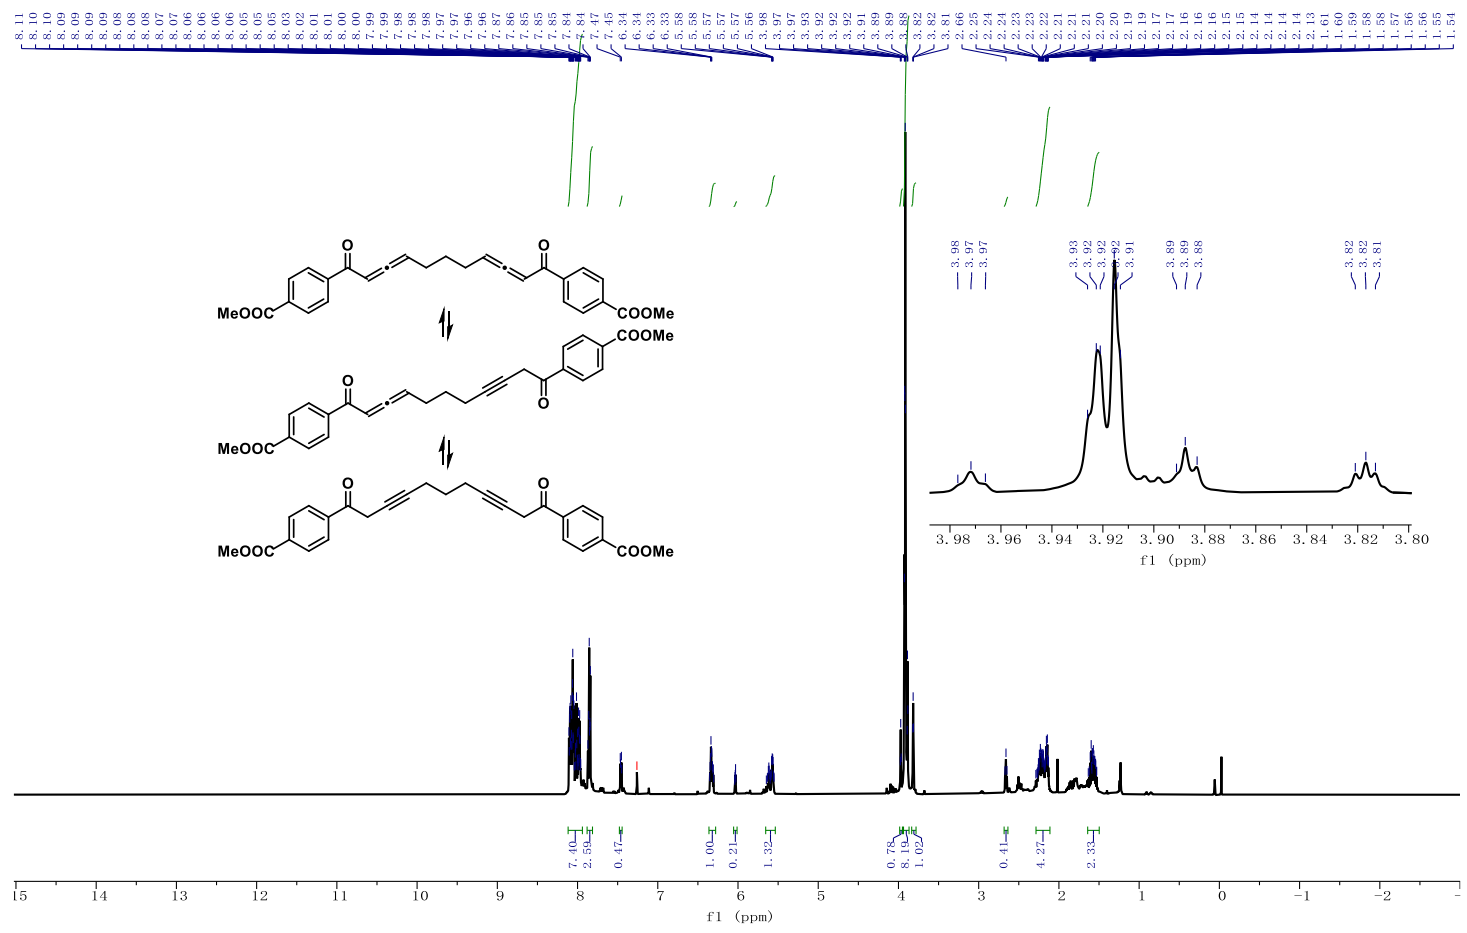

<sup>13</sup>C NMR (151 MHz, CDCl<sub>3</sub>) of **3t**

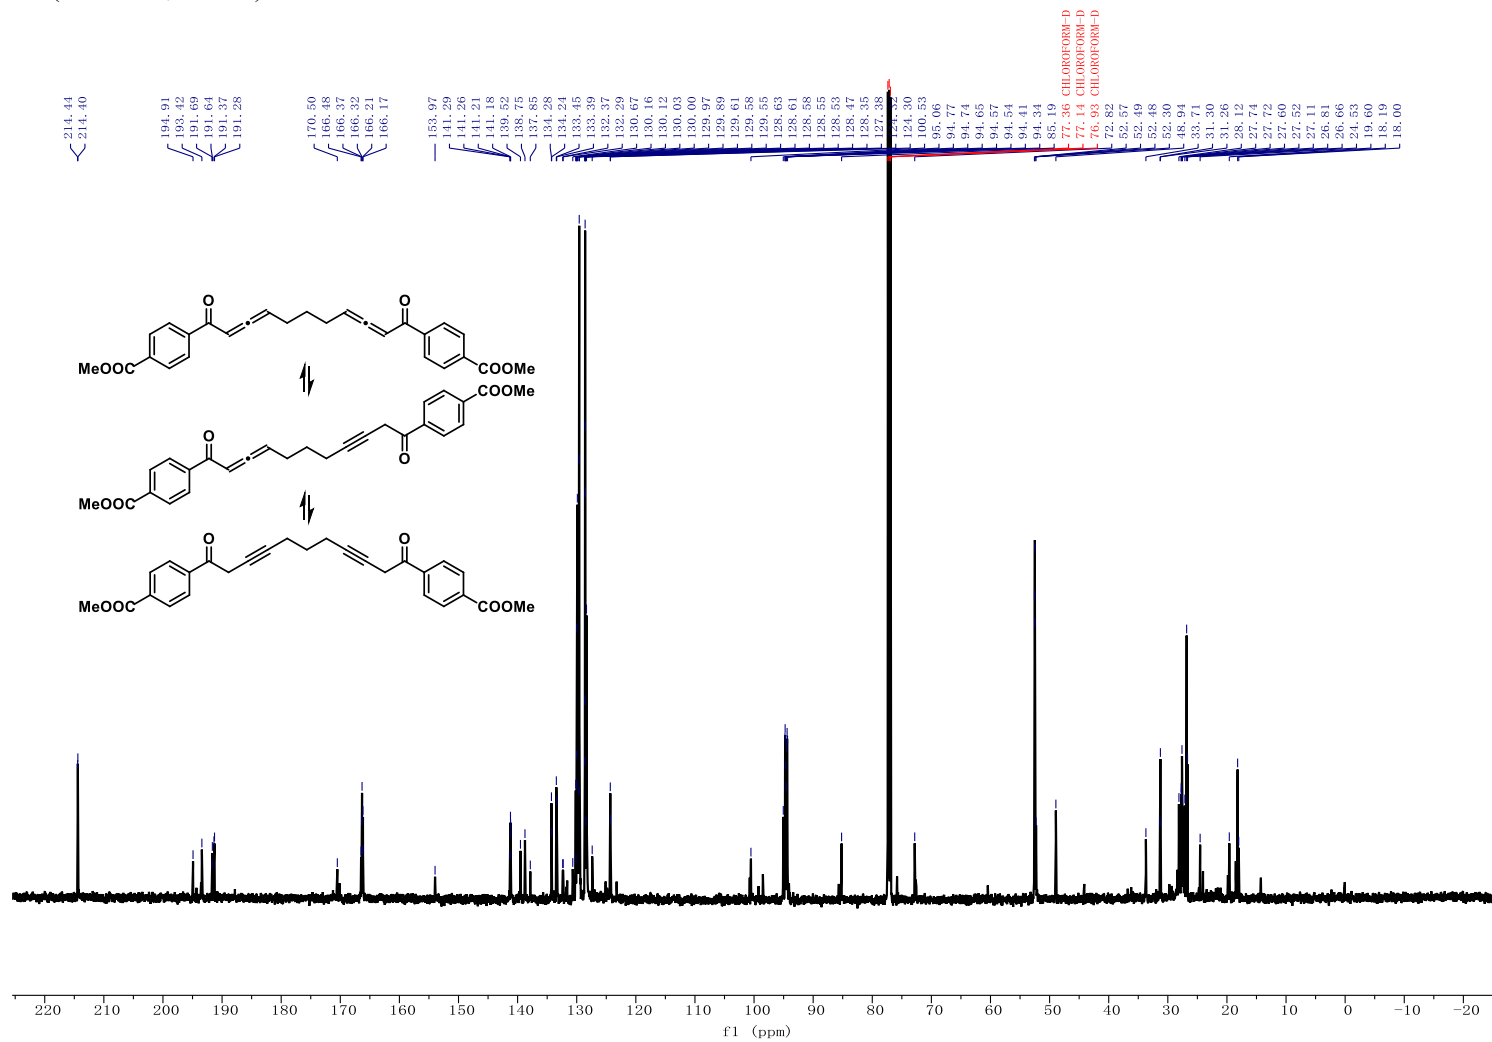

<sup>1</sup>H NMR (600 MHz, CDCl<sub>3</sub>) of **3u**

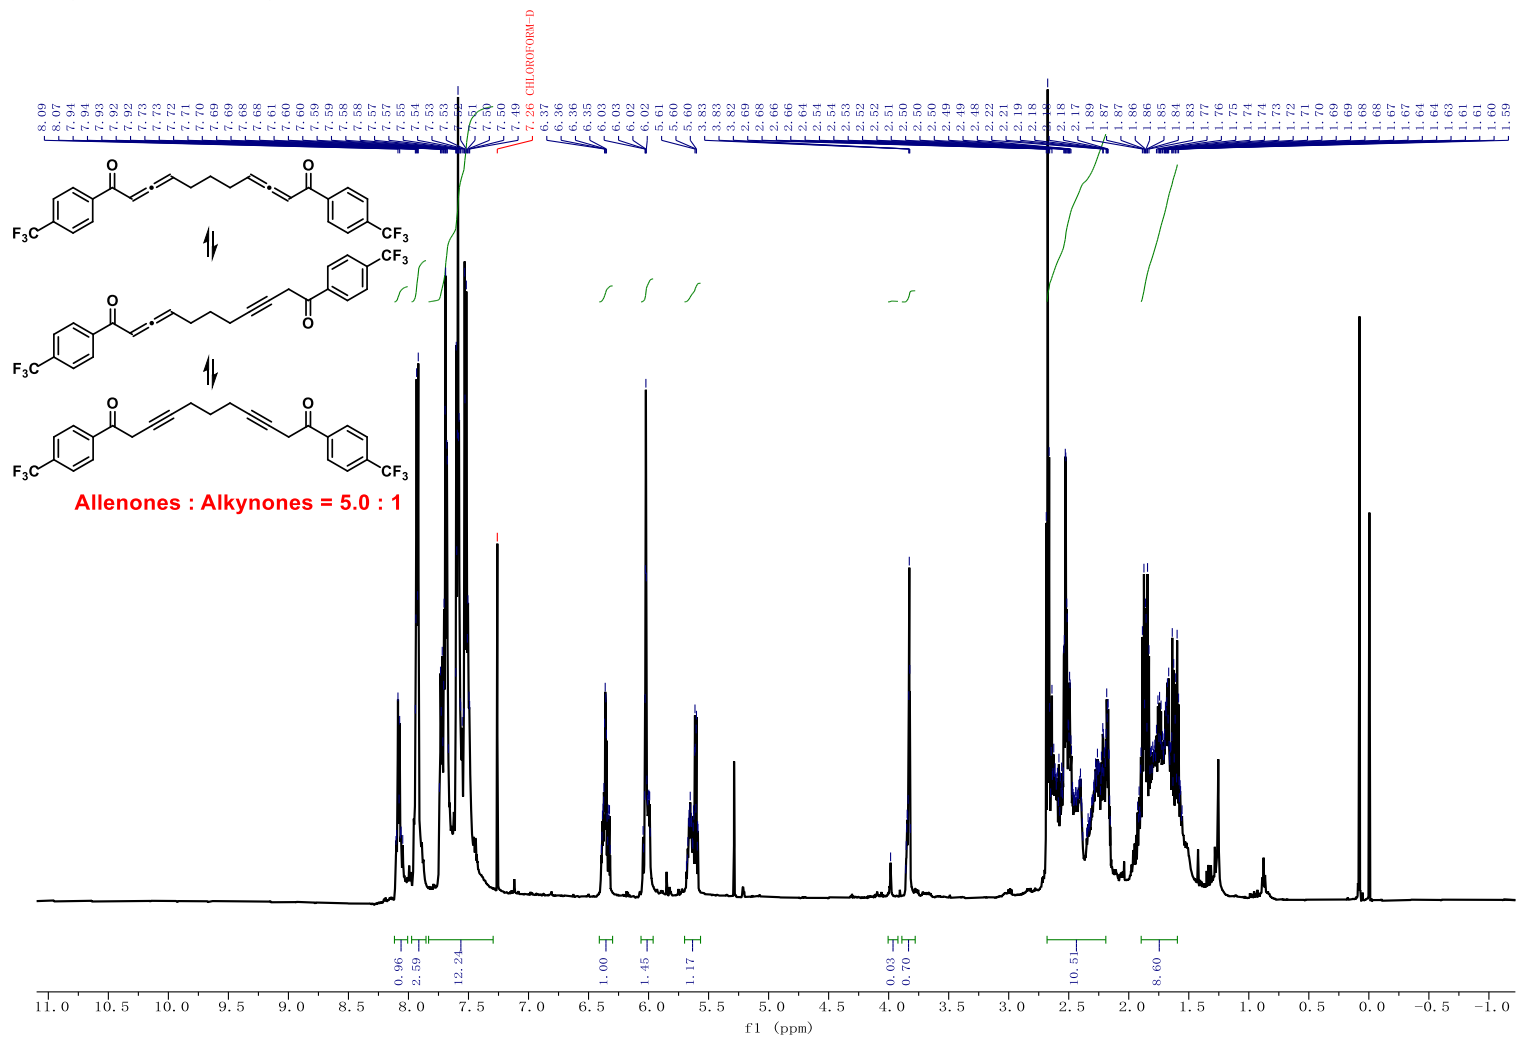

$^{13}\text{C}$  NMR (151 MHz,  $\text{CDCl}_3$ ) of **3u**

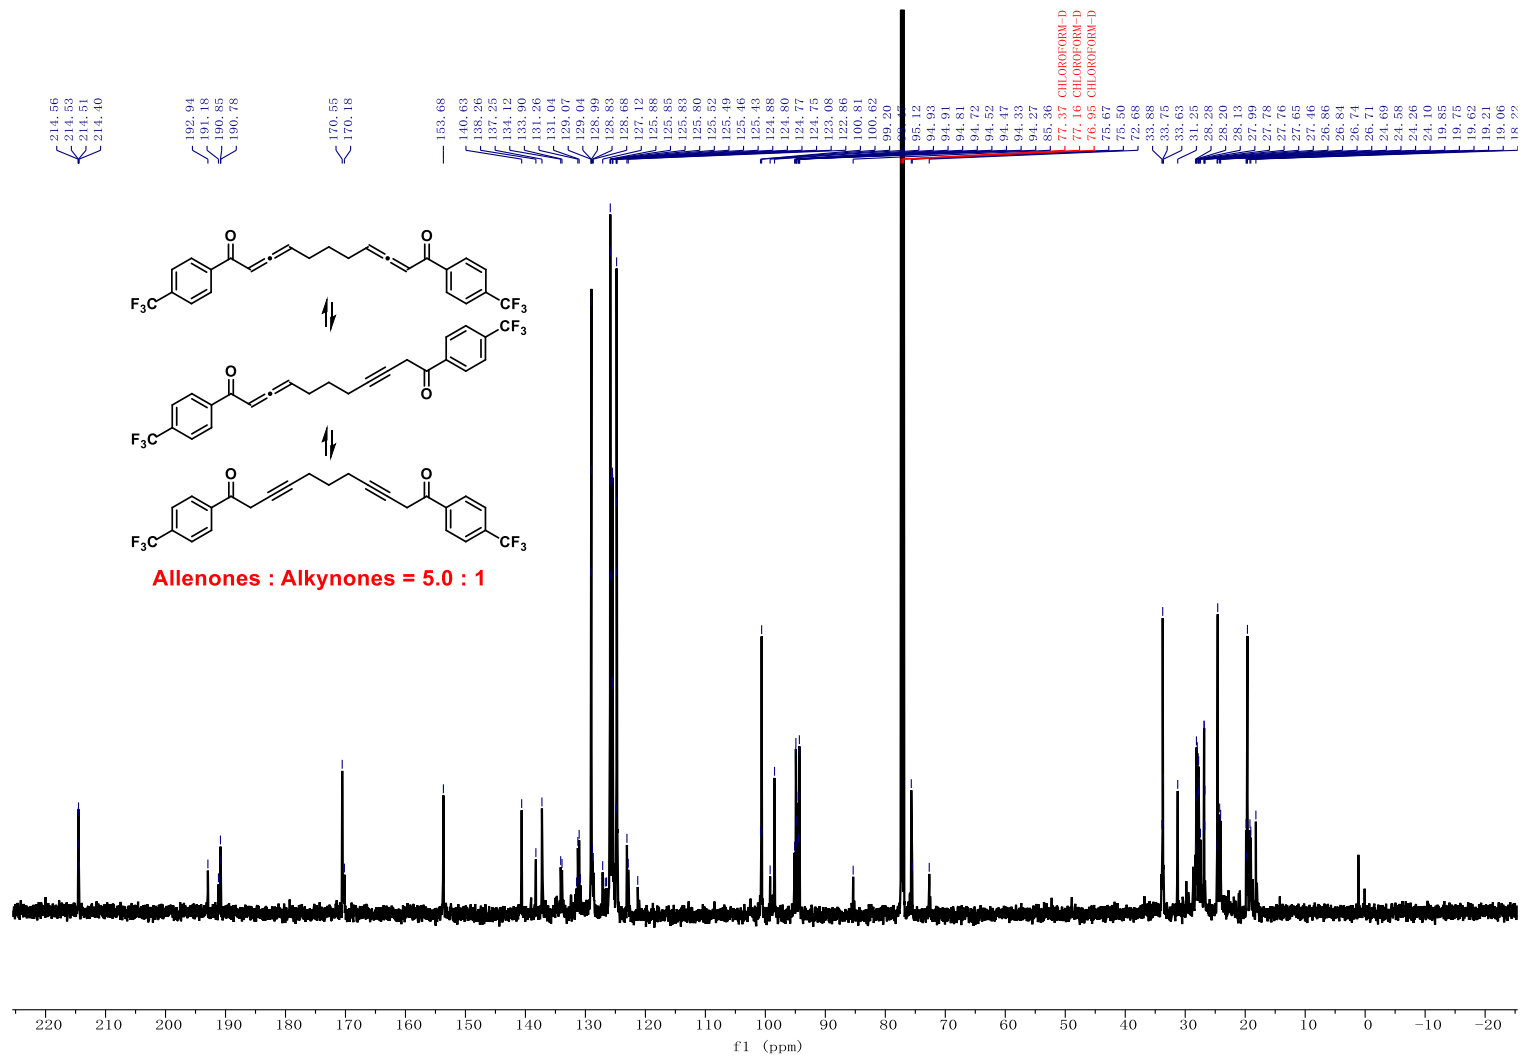

$^1\text{H NMR}$  (600 MHz,  $\text{CDCl}_3$ ) of **3v**

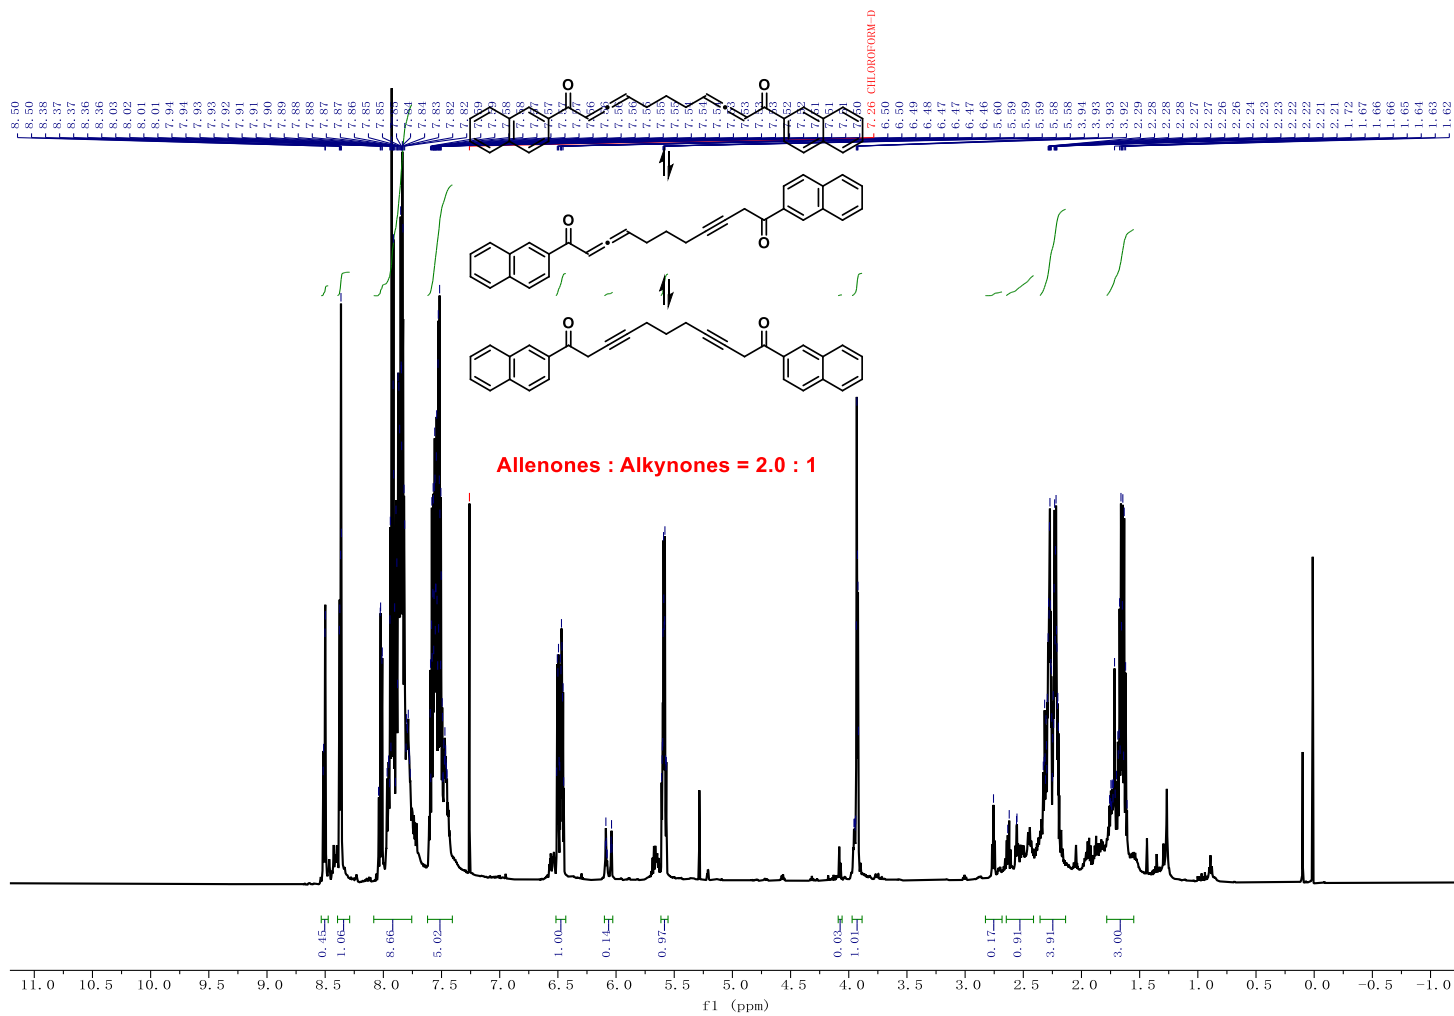



$^{13}\text{C}$  NMR (151 MHz,  $\text{CDCl}_3$ ) of **3v**

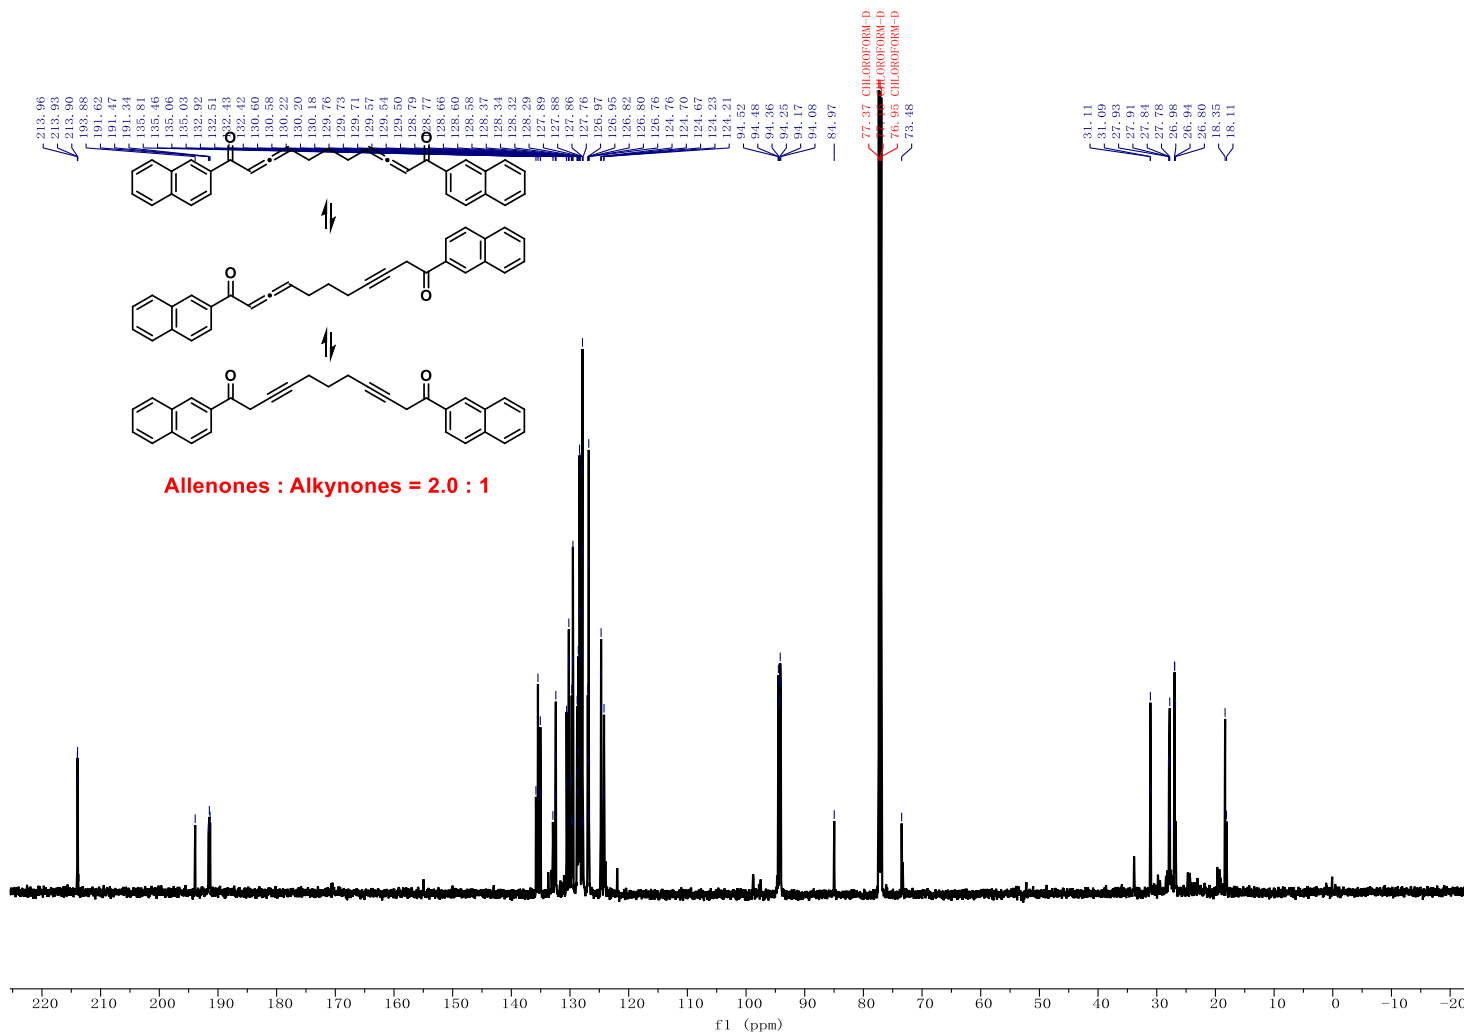

**Allenones : Alkynones = 2.0 : 1**

$^1\text{H}$  NMR (600 MHz,  $\text{CDCl}_3$ ) of **3w**

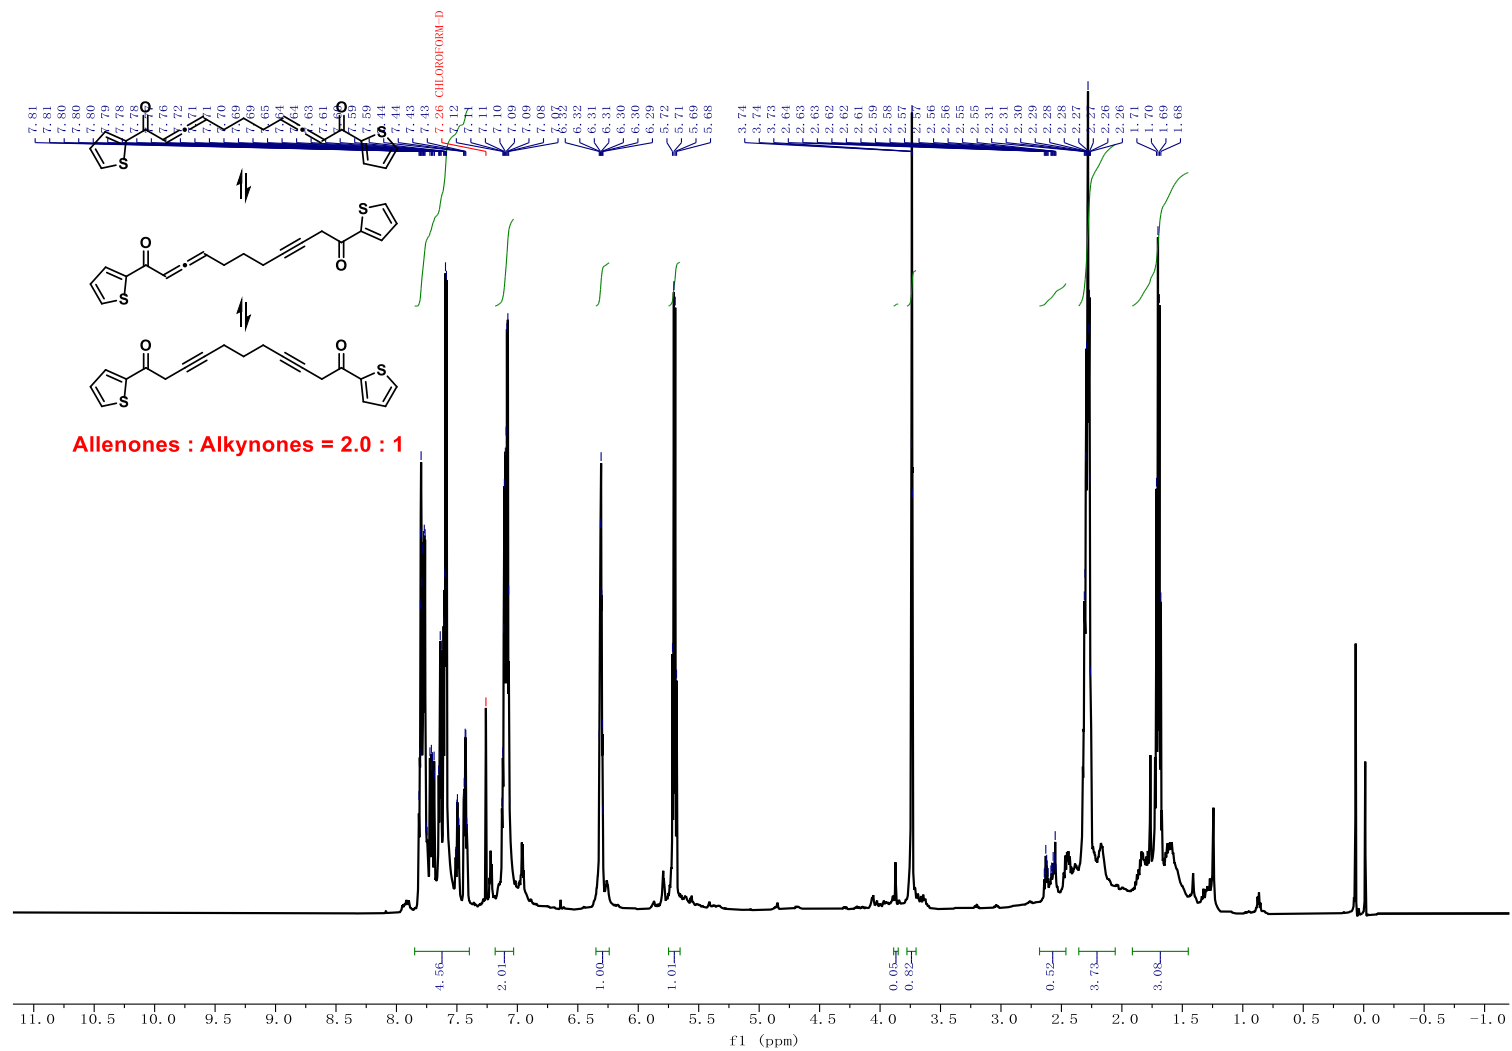

$^{13}\text{C}$  NMR (151 MHz,  $\text{CDCl}_3$ ) of **3w**

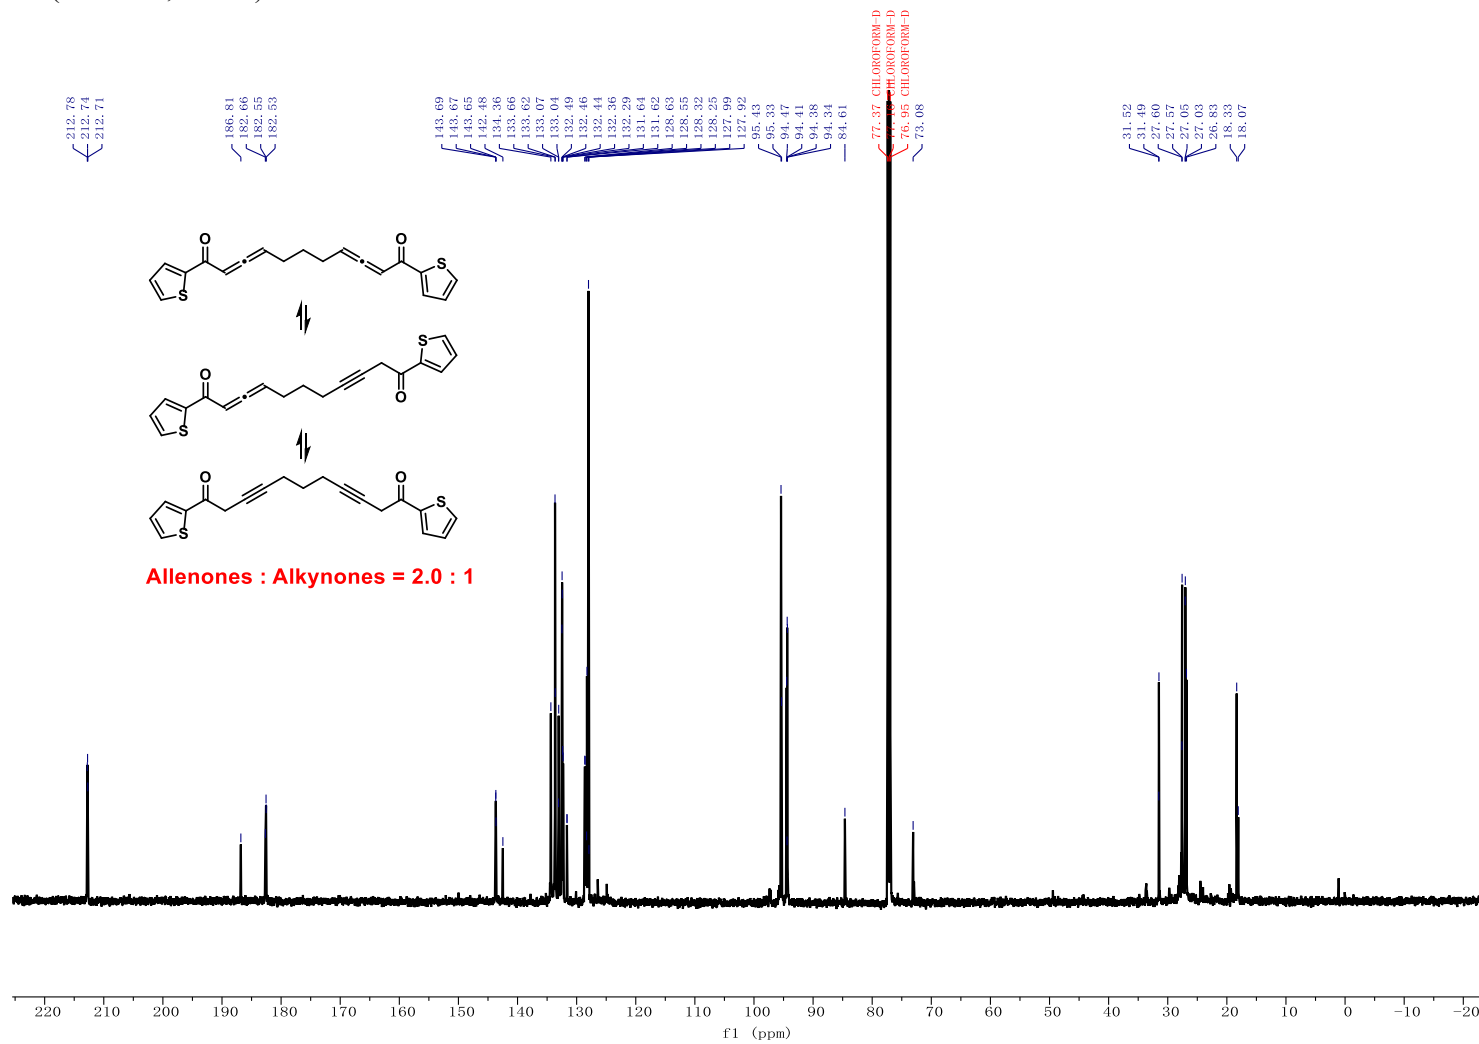

<sup>1</sup>H NMR (600 MHz, CDCl<sub>3</sub>) of **3x**

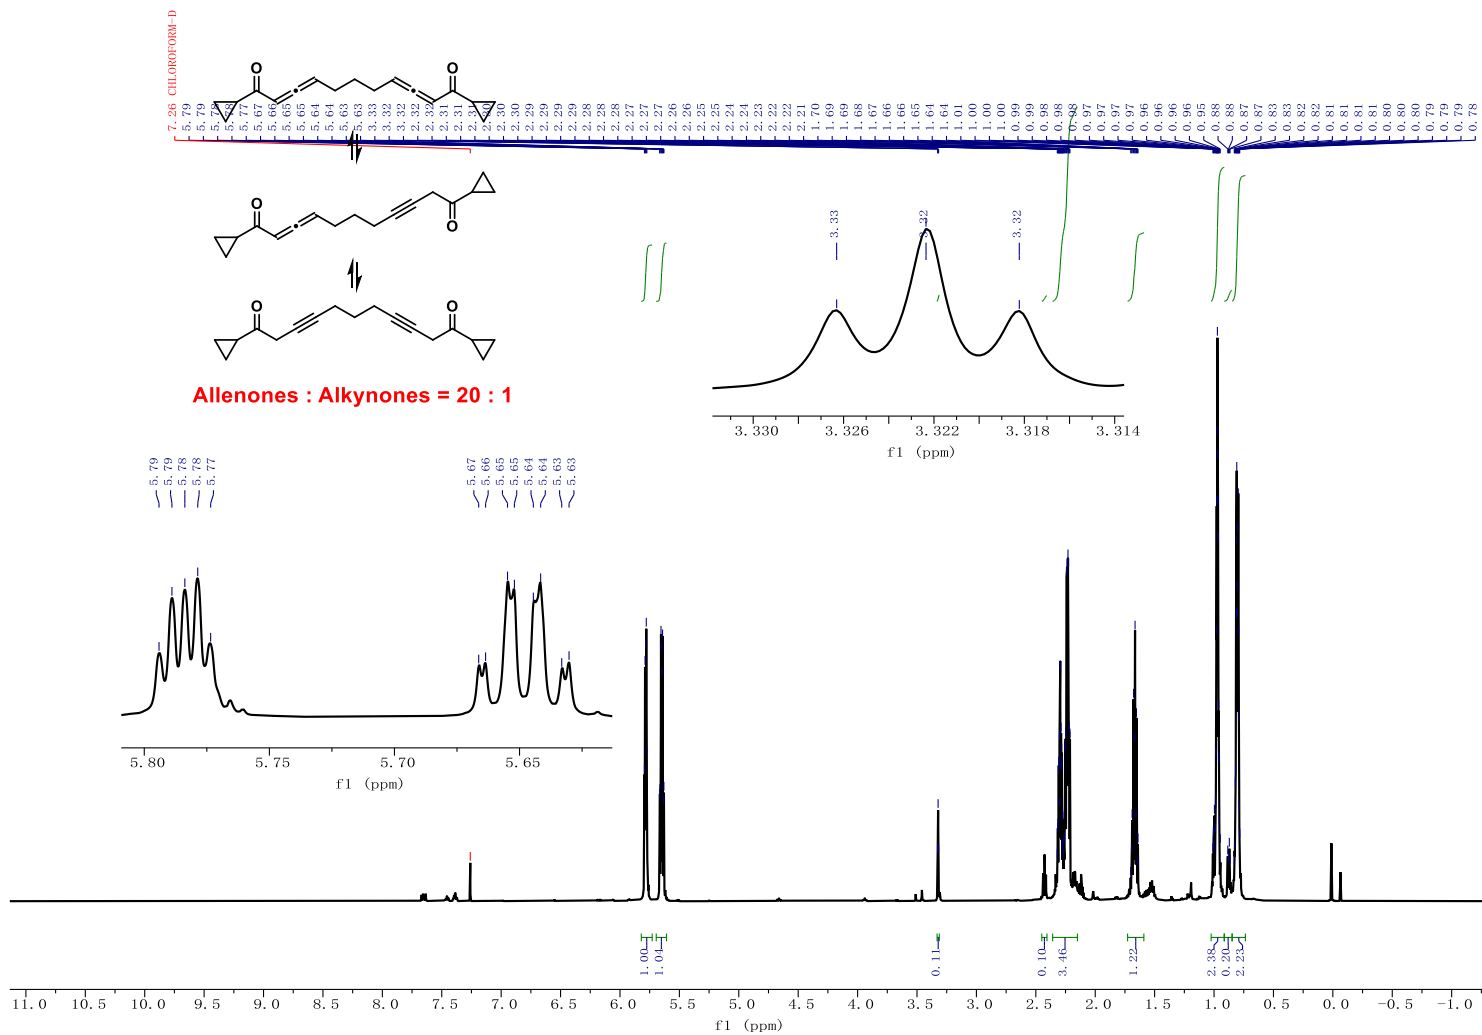

$^{13}\text{C}$  NMR (151 MHz,  $\text{CDCl}_3$ ) of **3x**

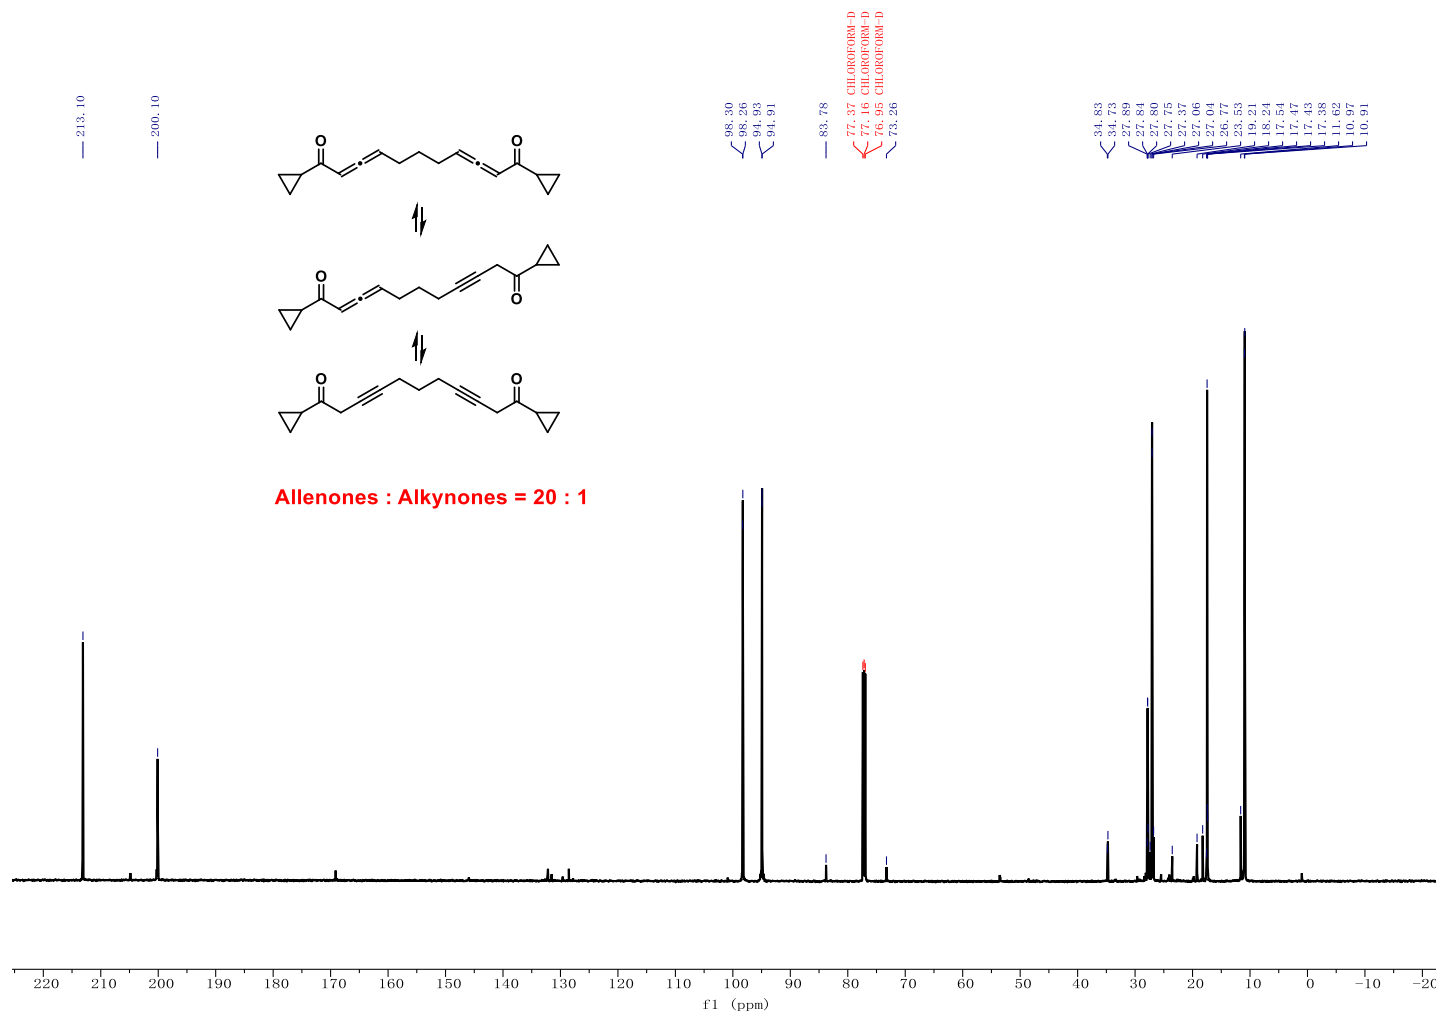

<sup>1</sup>H NMR (600 MHz, CDCl<sub>3</sub>) of **4a**

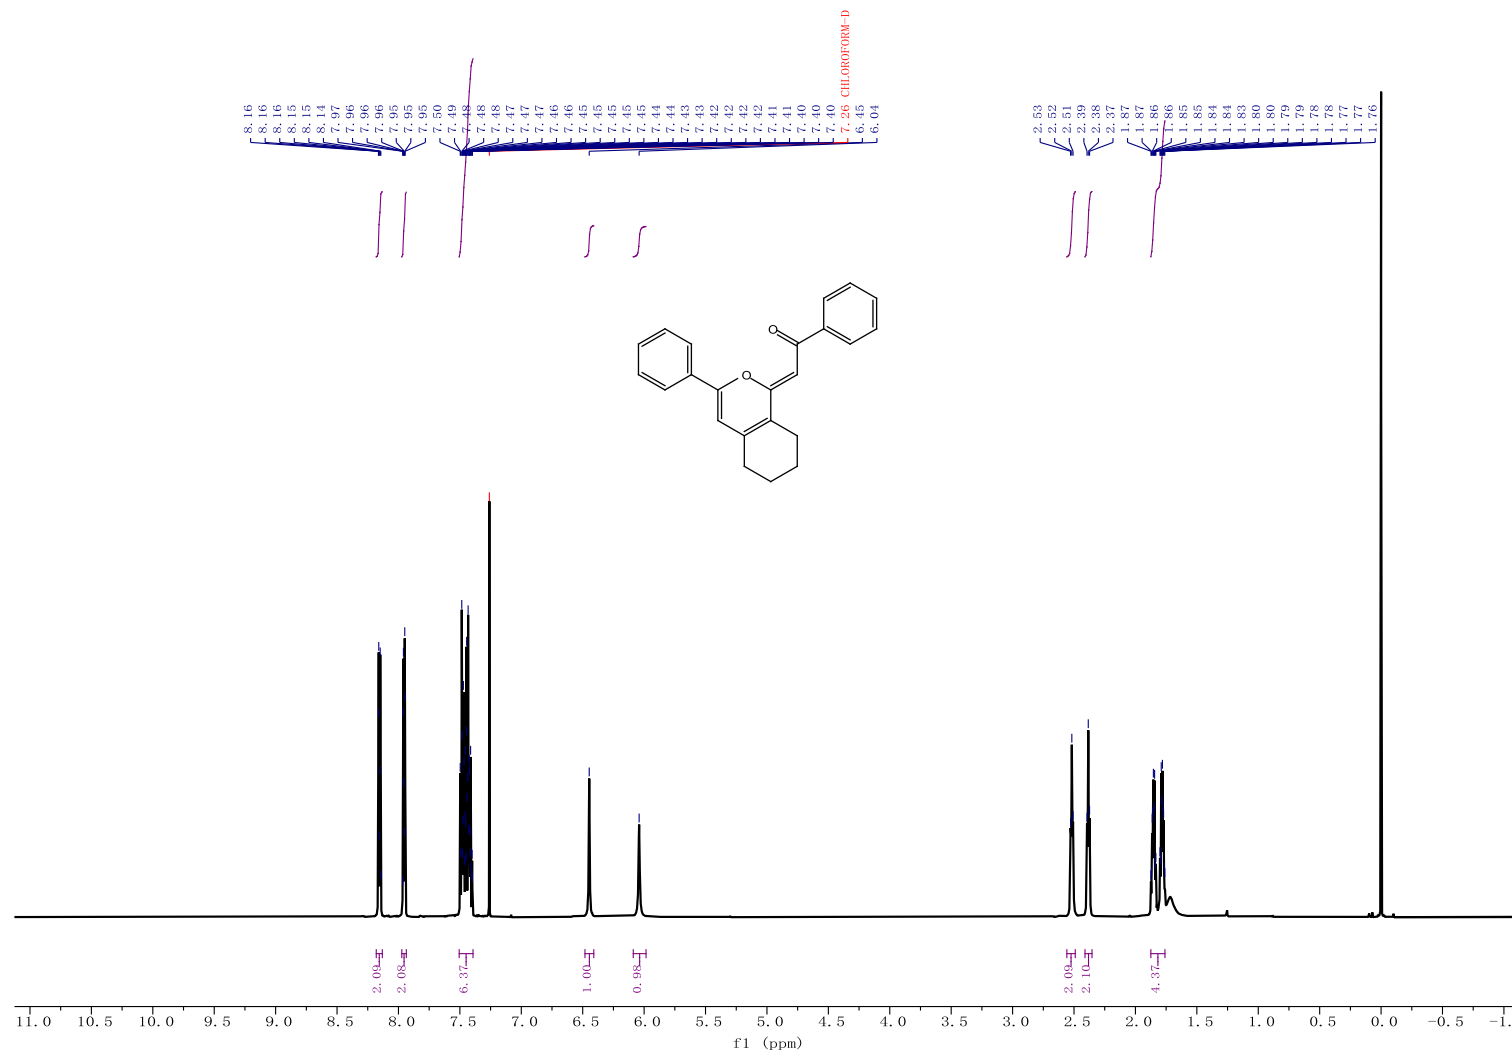

<sup>13</sup>C NMR (101 MHz, CDCl<sub>3</sub>) of **4a**

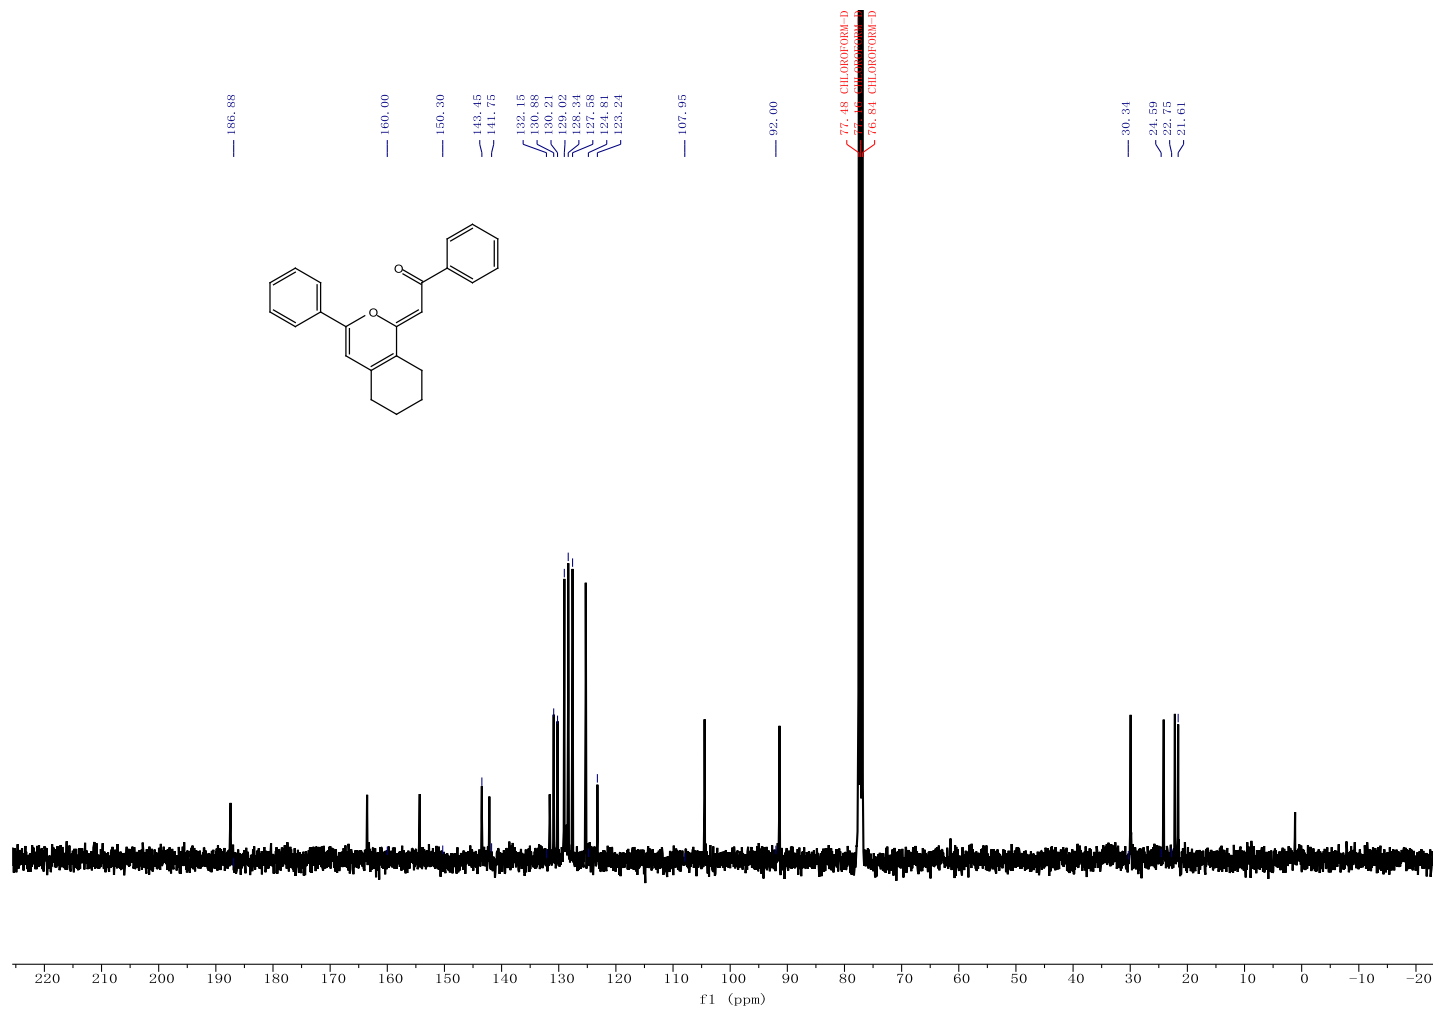

$^1\text{H}$  NMR (600 MHz,  $\text{CDCl}_3$ ) of **4b**

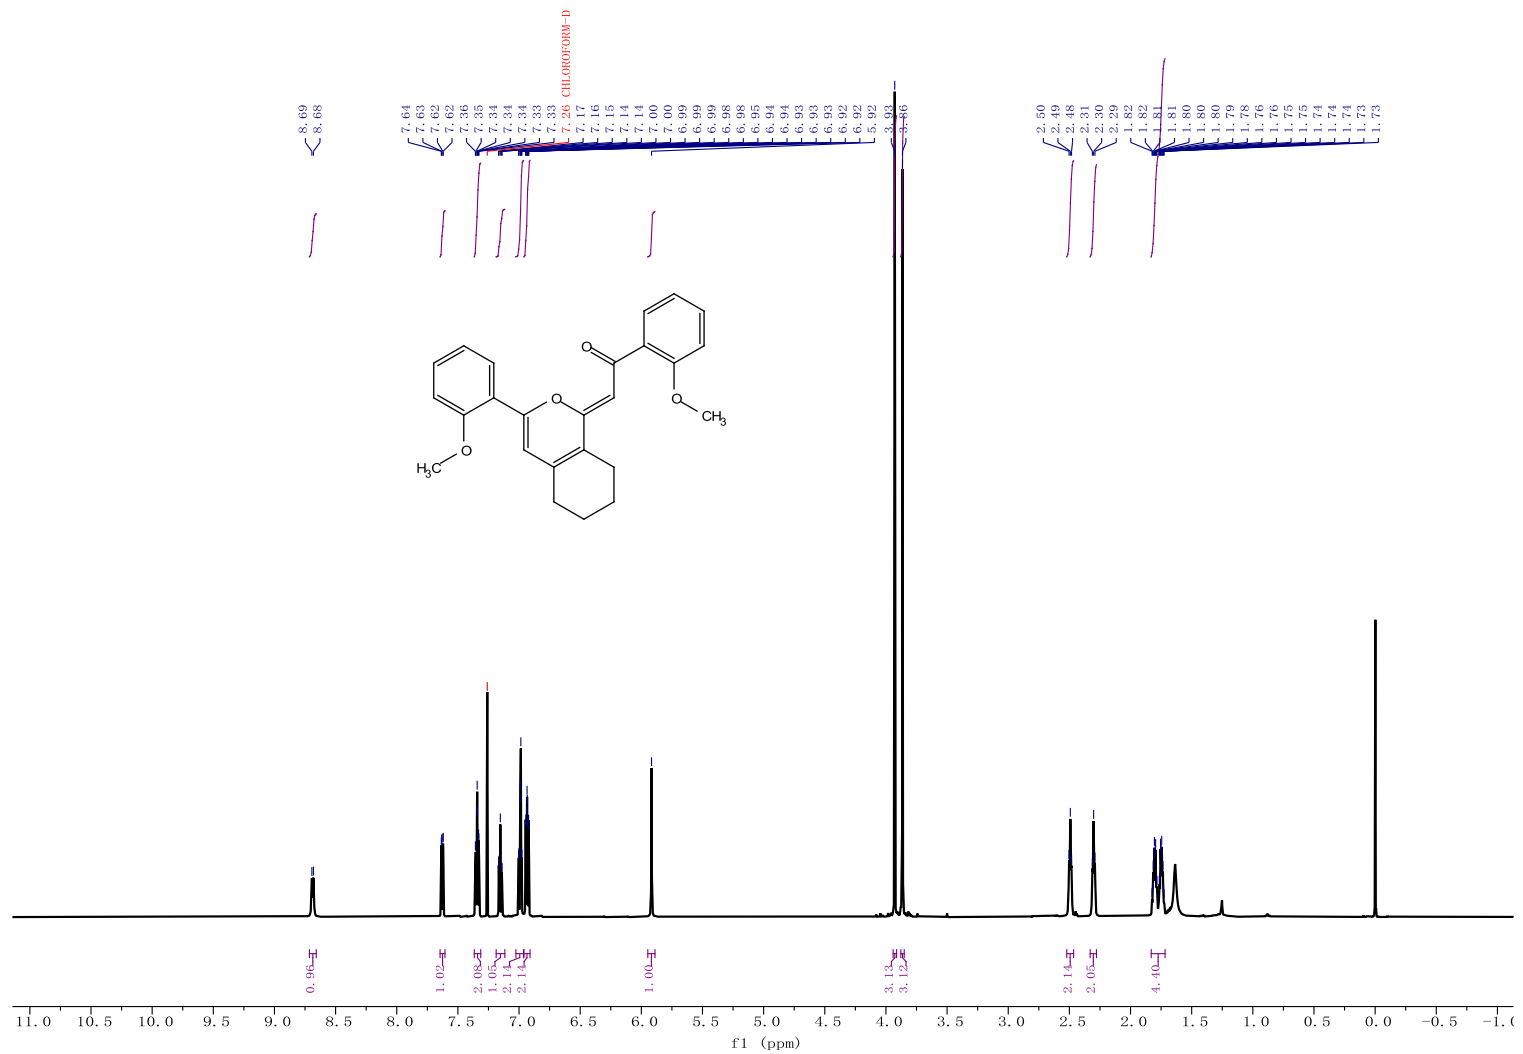



$^{13}\text{C}$  NMR (151 MHz,  $\text{CDCl}_3$ ) of **4b**

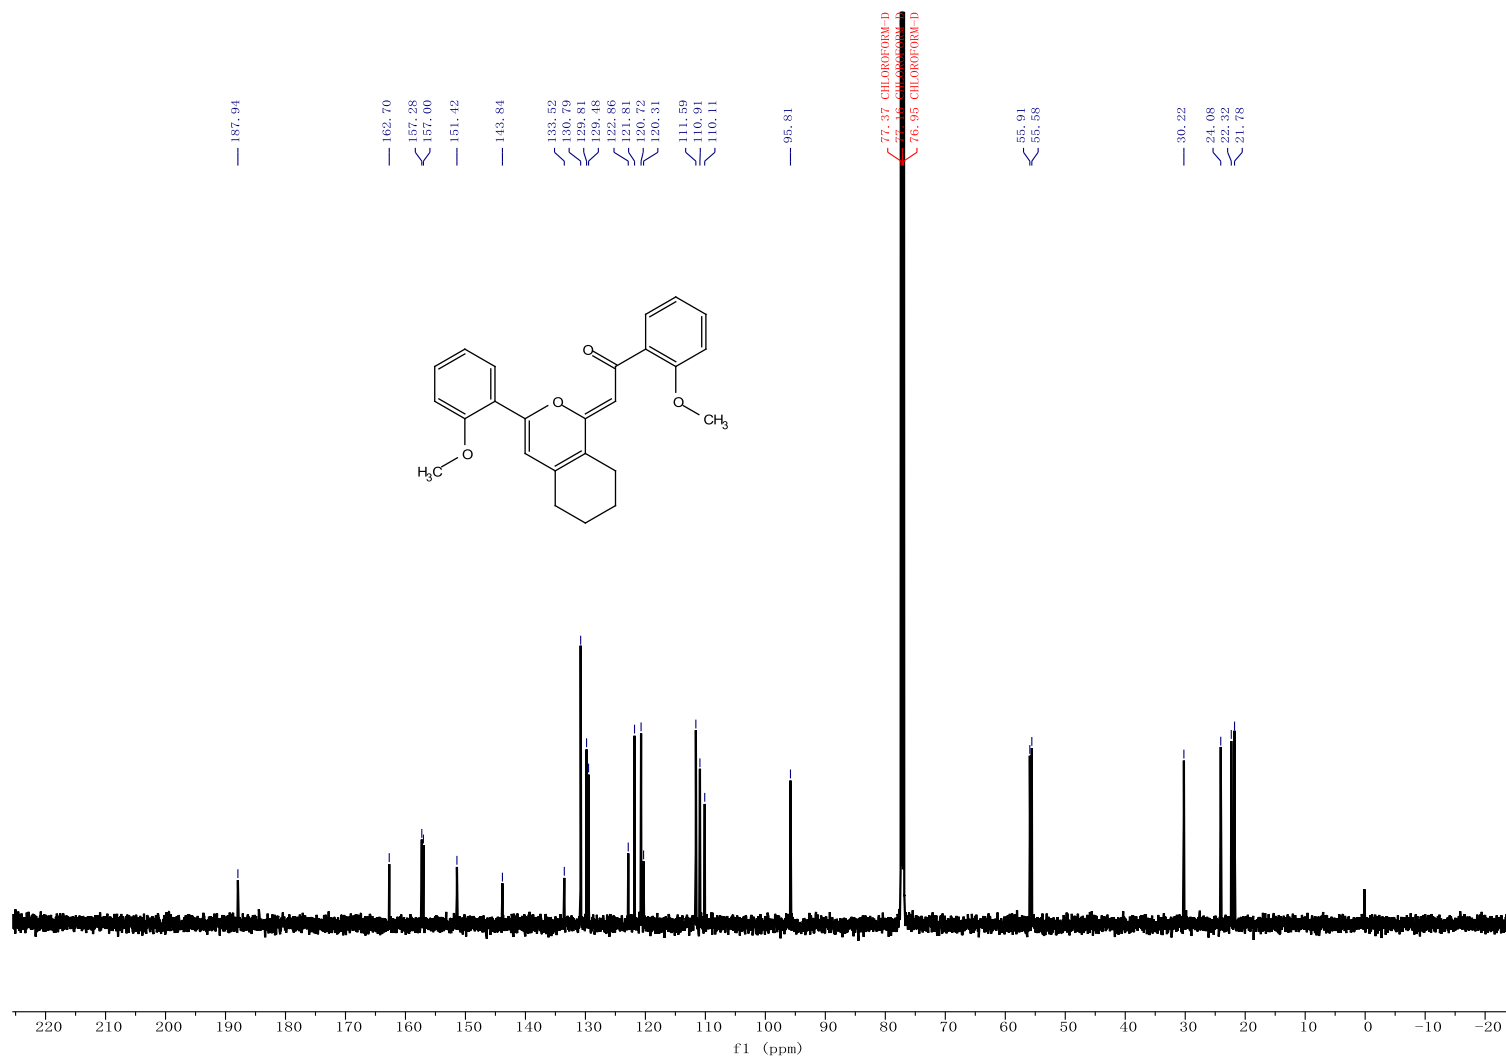

<sup>1</sup>H NMR (600 MHz, CDCl<sub>3</sub>) of **4c**

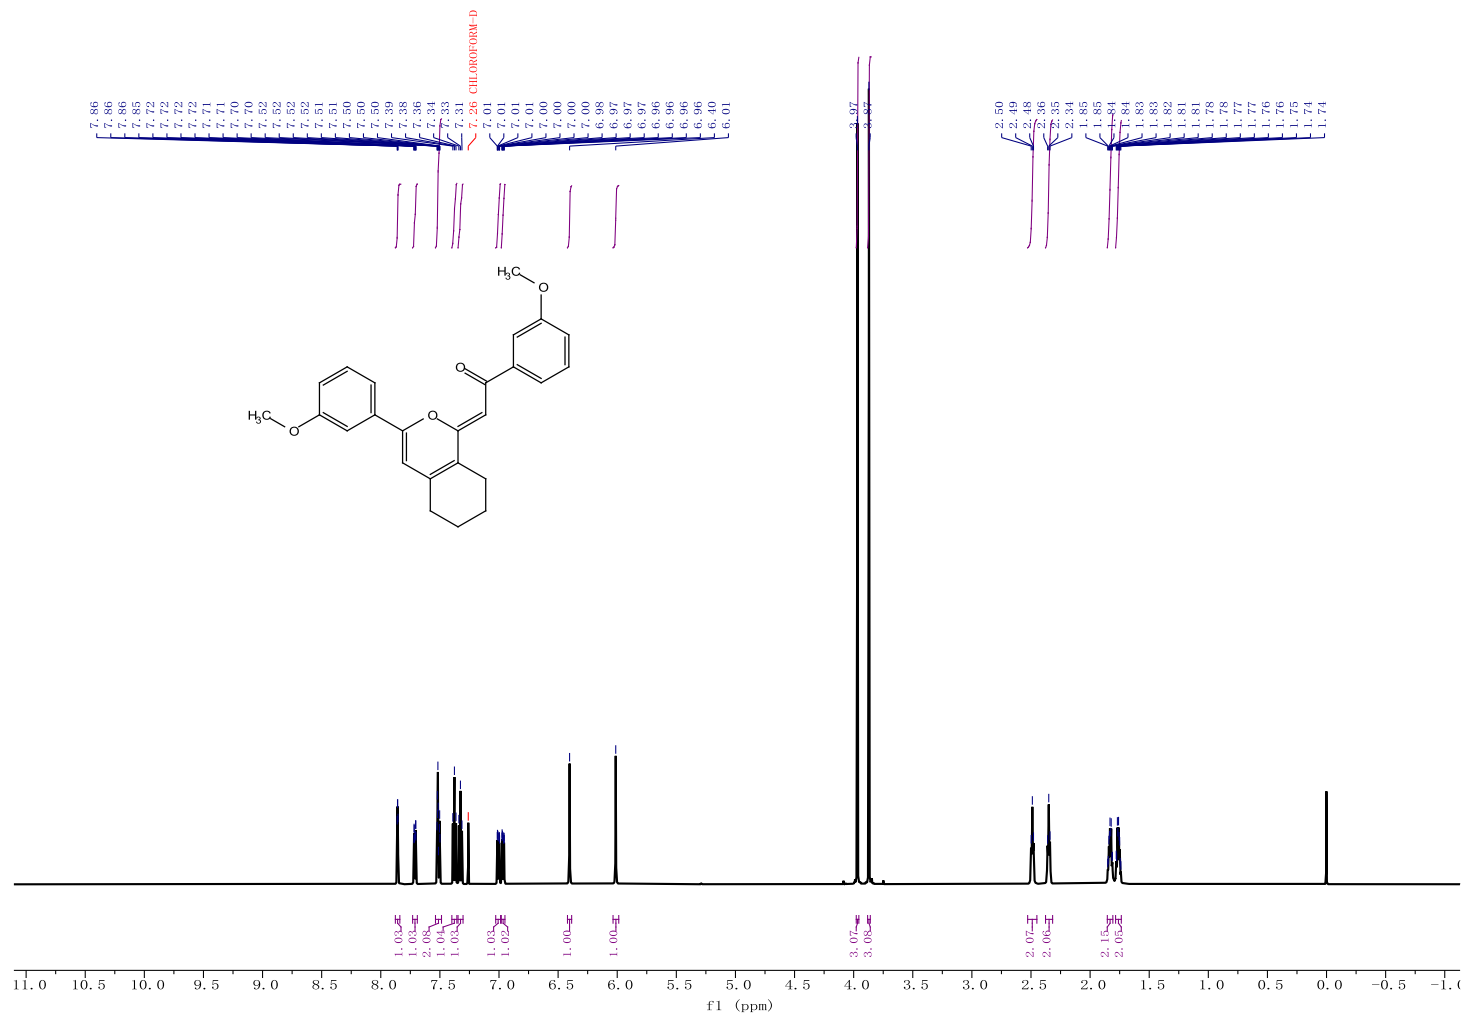

$^{13}\text{C}$  NMR (151 MHz,  $\text{CDCl}_3$ ) of **4c**

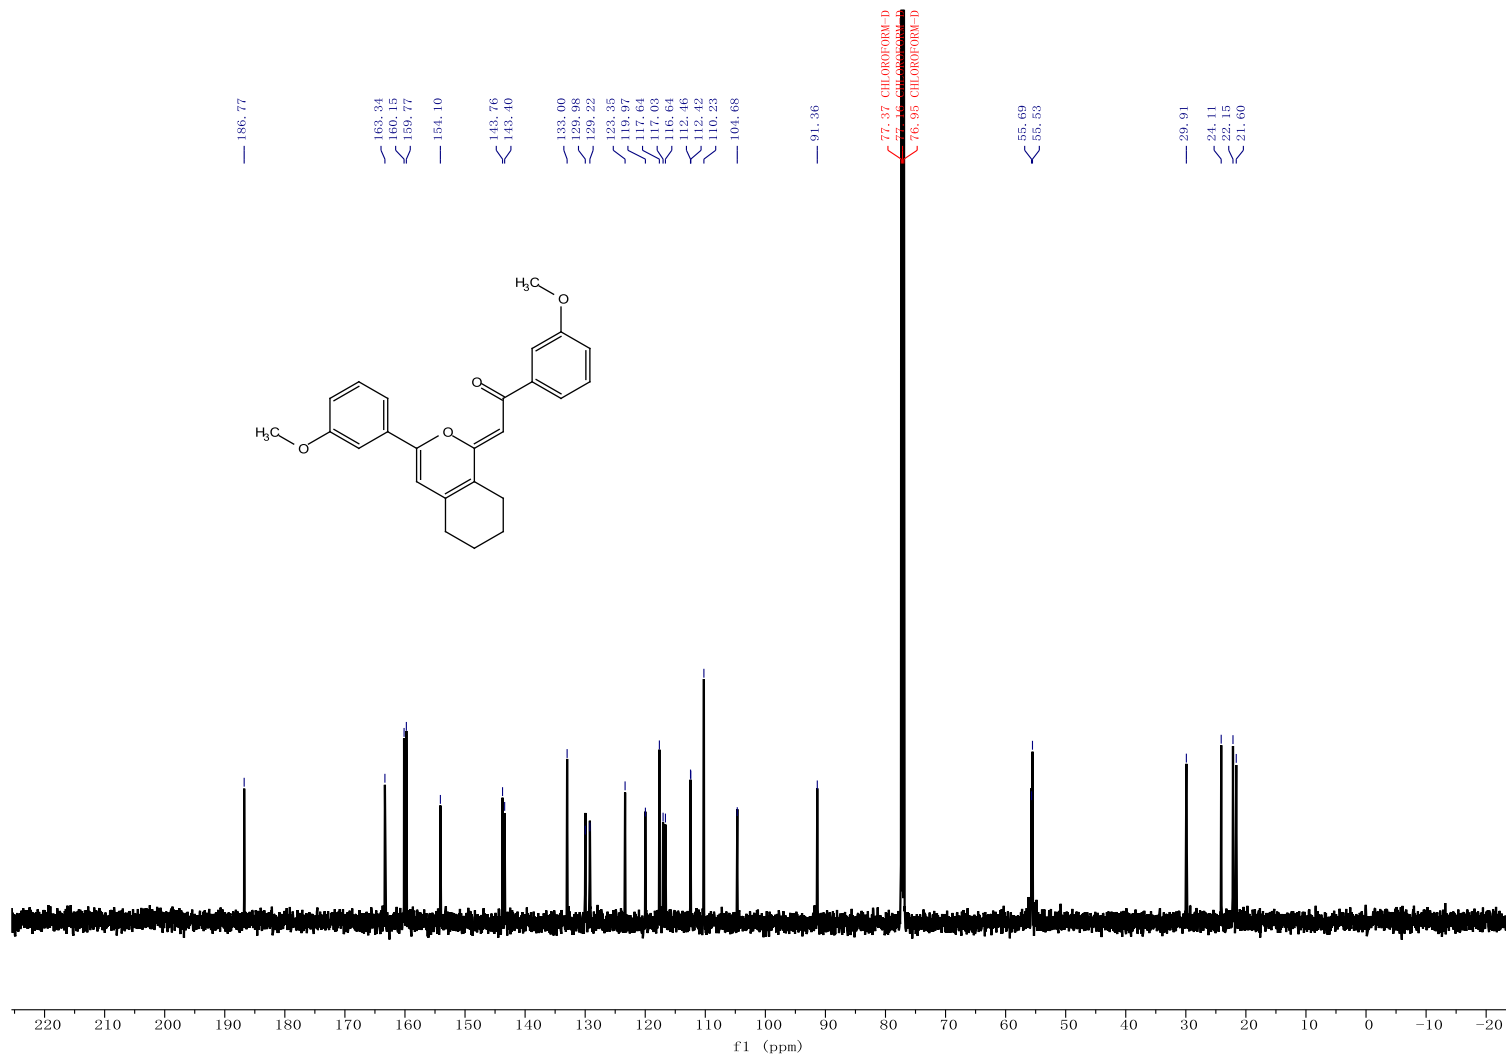

<sup>1</sup>H NMR (600 MHz, CDCl<sub>3</sub>) of **4d**

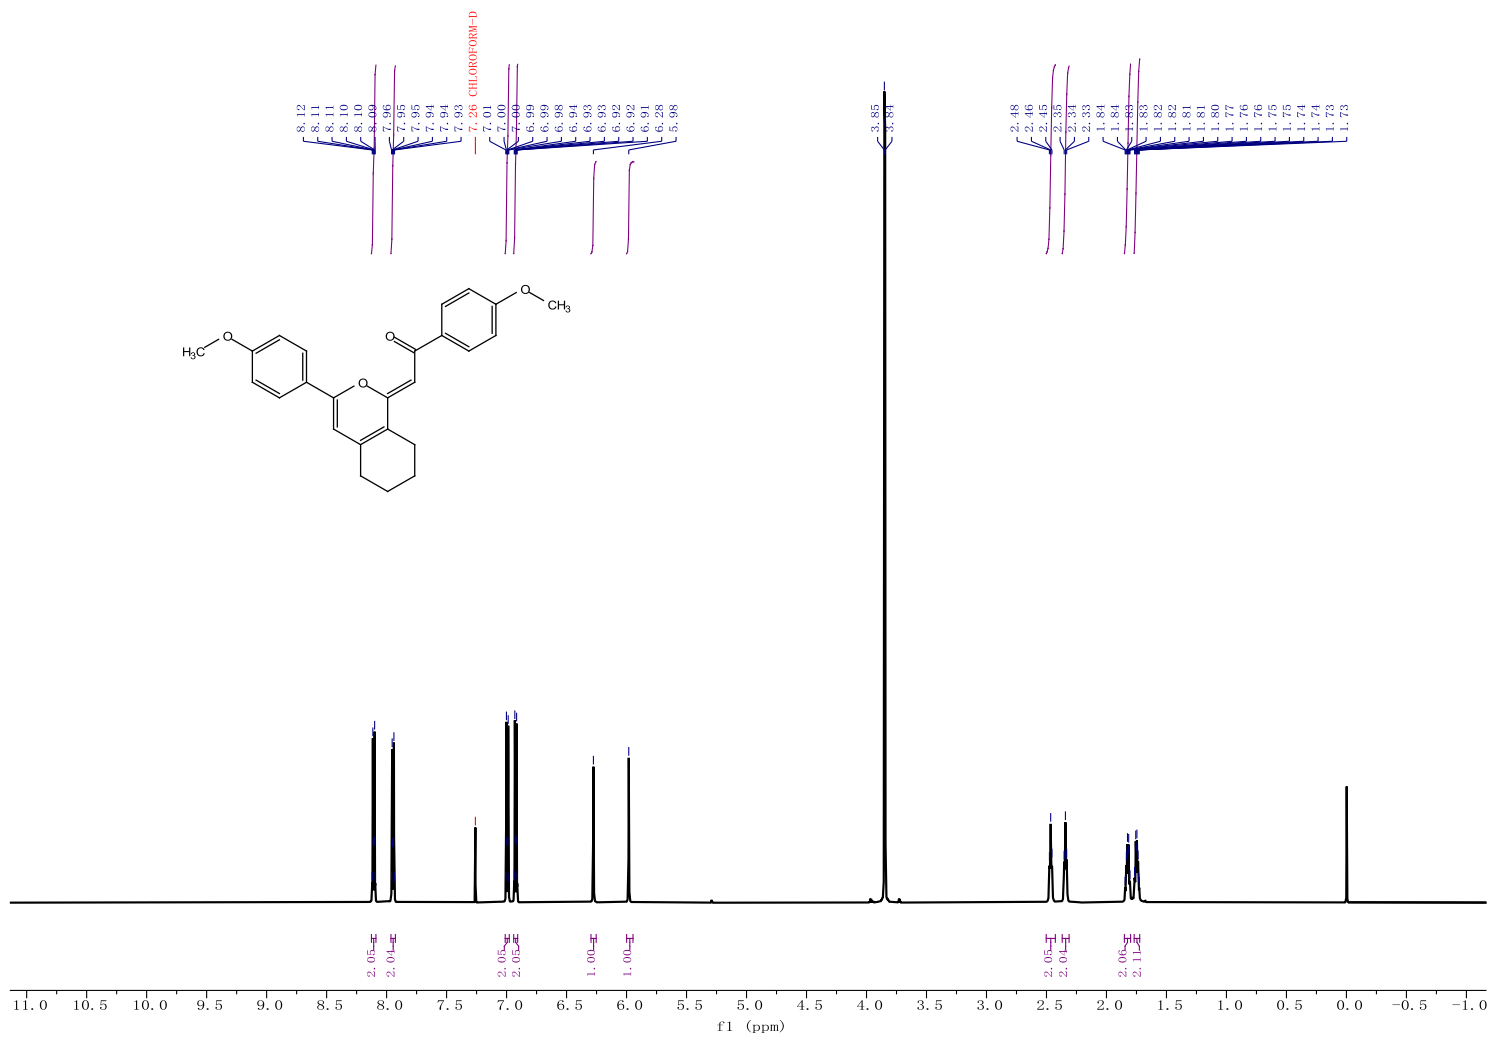

<sup>13</sup>C NMR (151 MHz, CDCl<sub>3</sub>) of **4d**

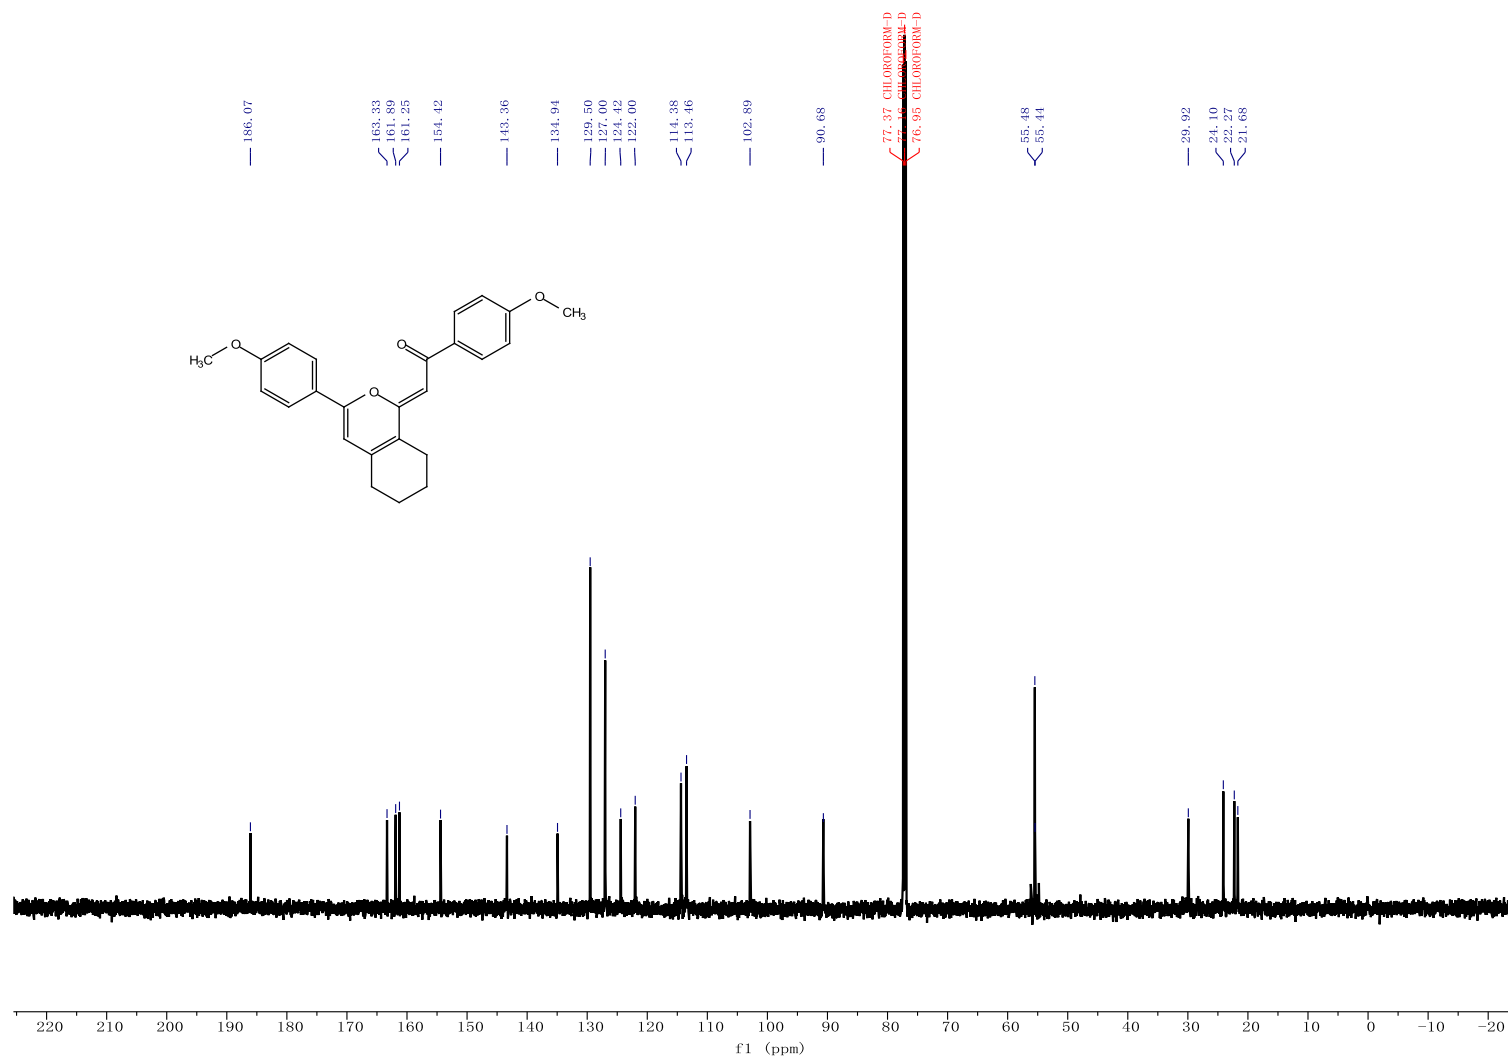

<sup>1</sup>H NMR (600 MHz, CDCl<sub>3</sub>) of **4e**

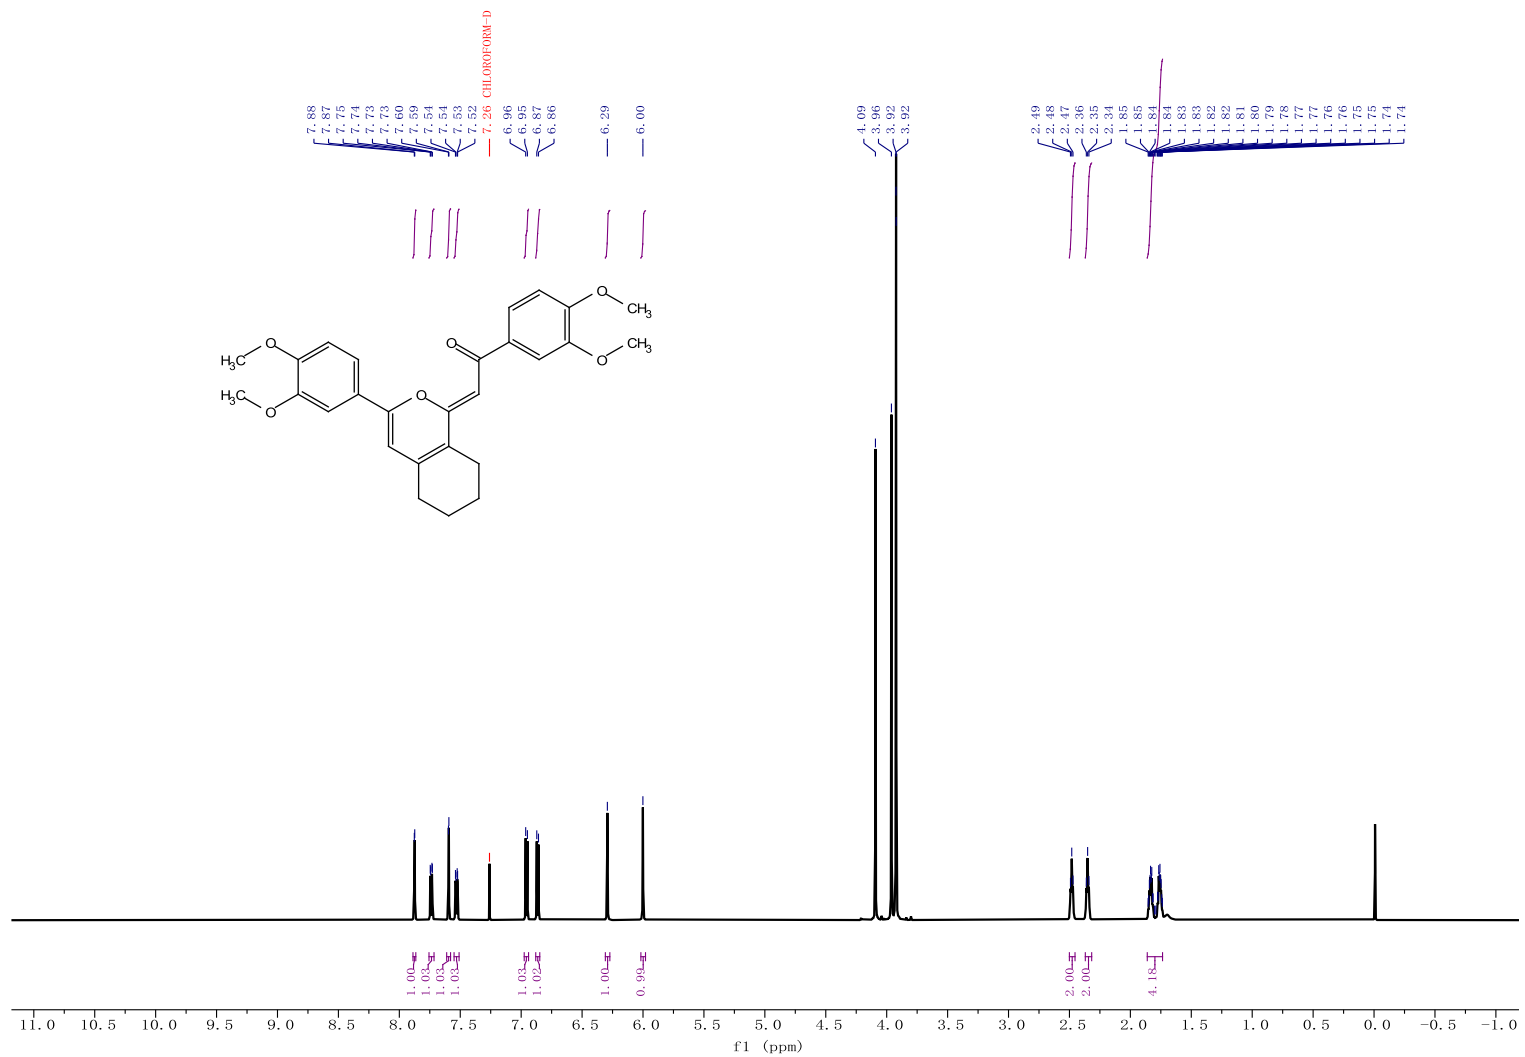

<sup>13</sup>C NMR (151 MHz, CDCl<sub>3</sub>) of **4e**

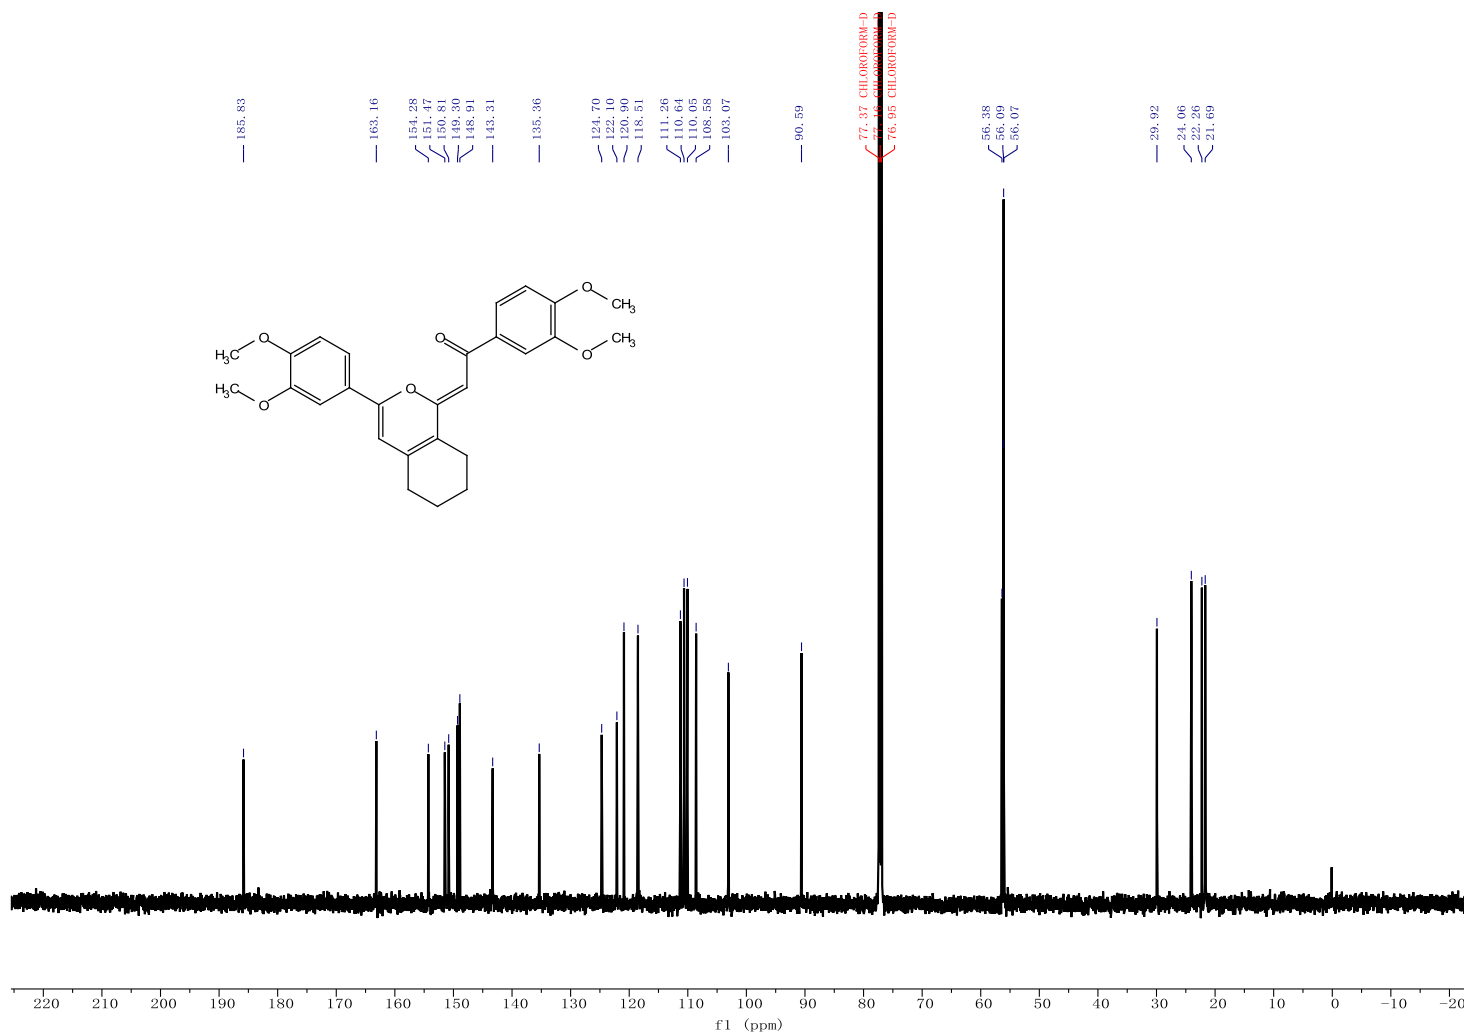

<sup>1</sup>H NMR (600 MHz, CDCl<sub>3</sub>) of **4f**

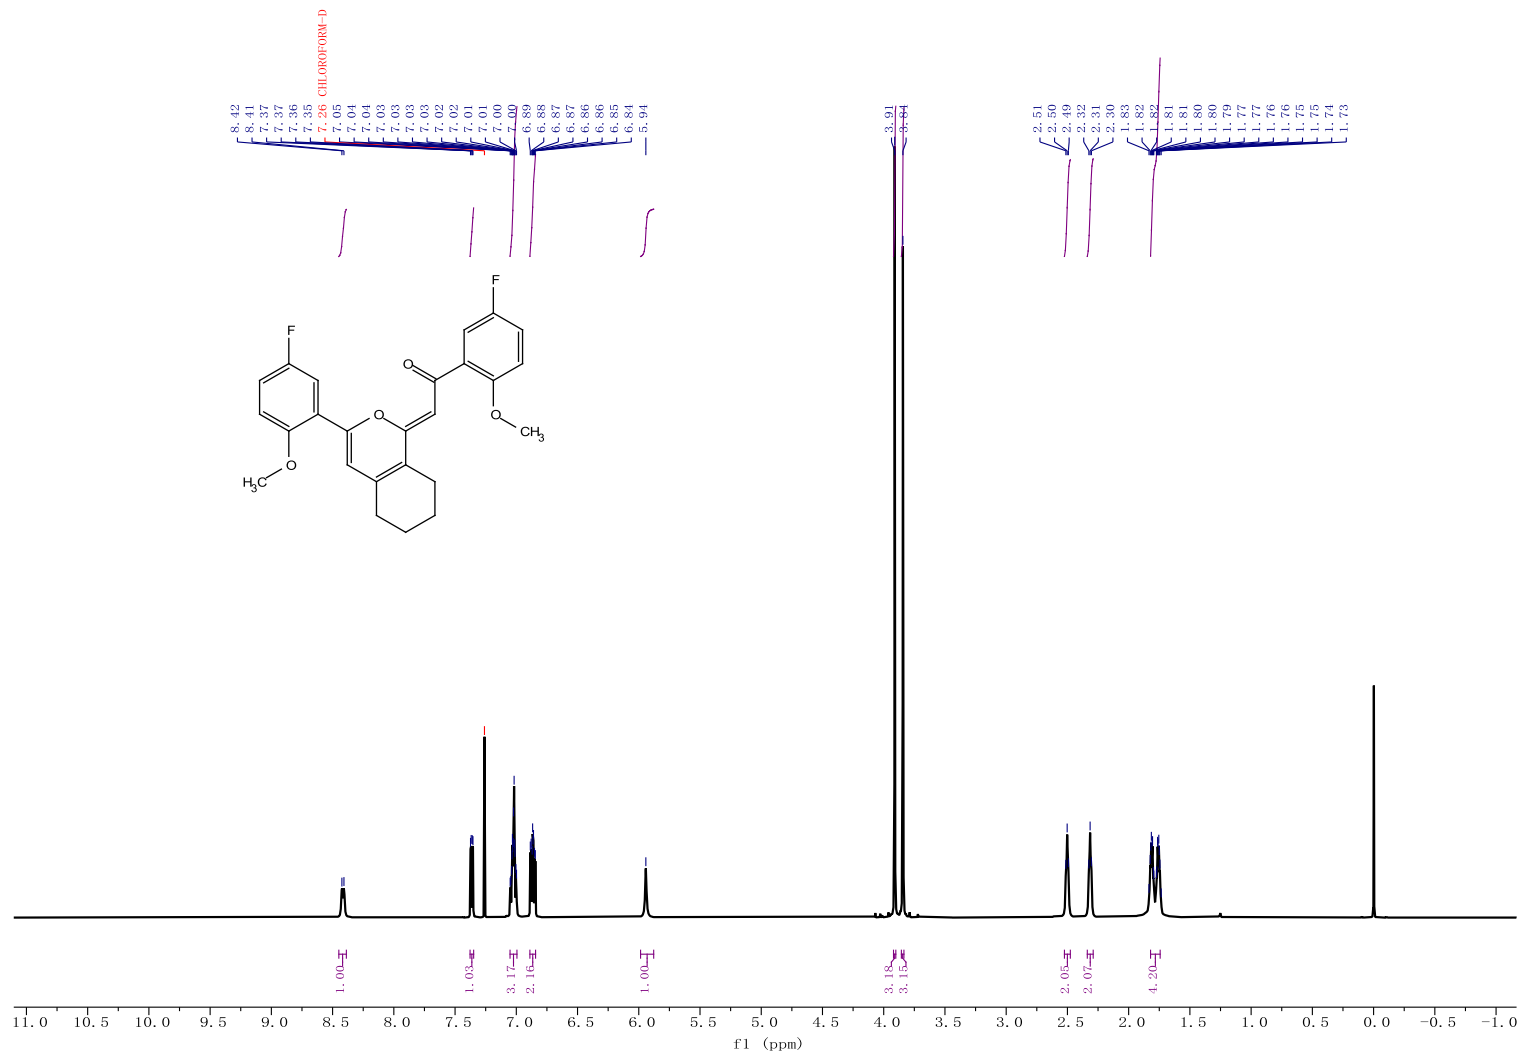



<sup>13</sup>C NMR (151 MHz, CDCl<sub>3</sub>) of **4f**

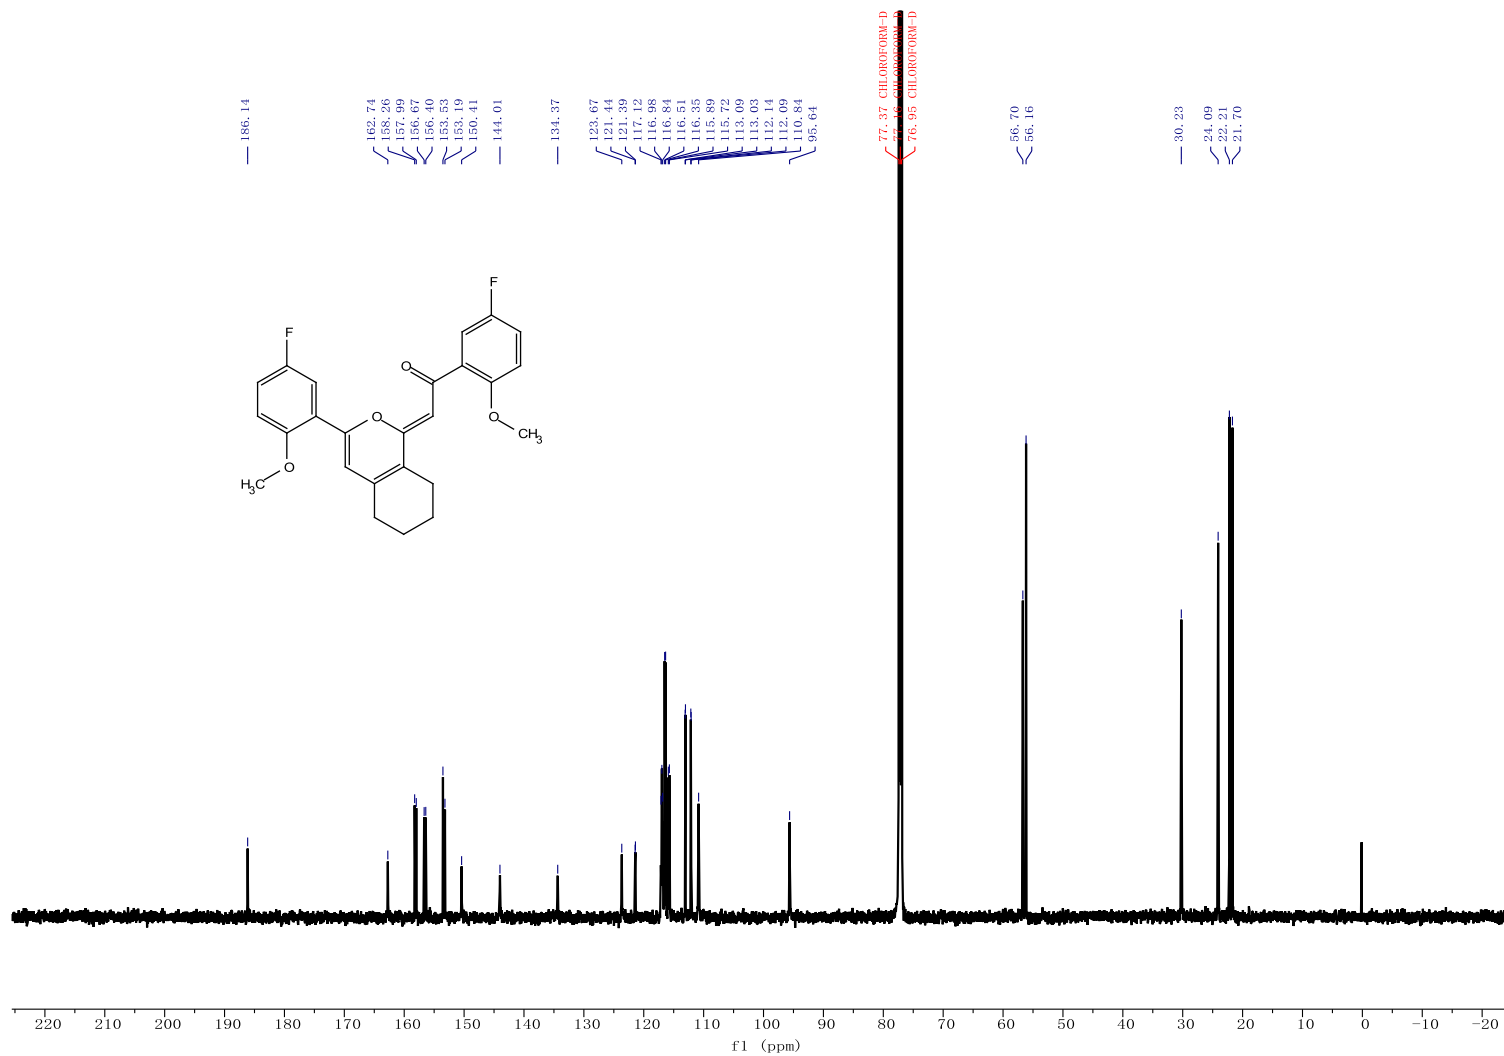

$^{19}\text{F}$  NMR (565 MHz,  $\text{CDCl}_3$ ) of **4f**

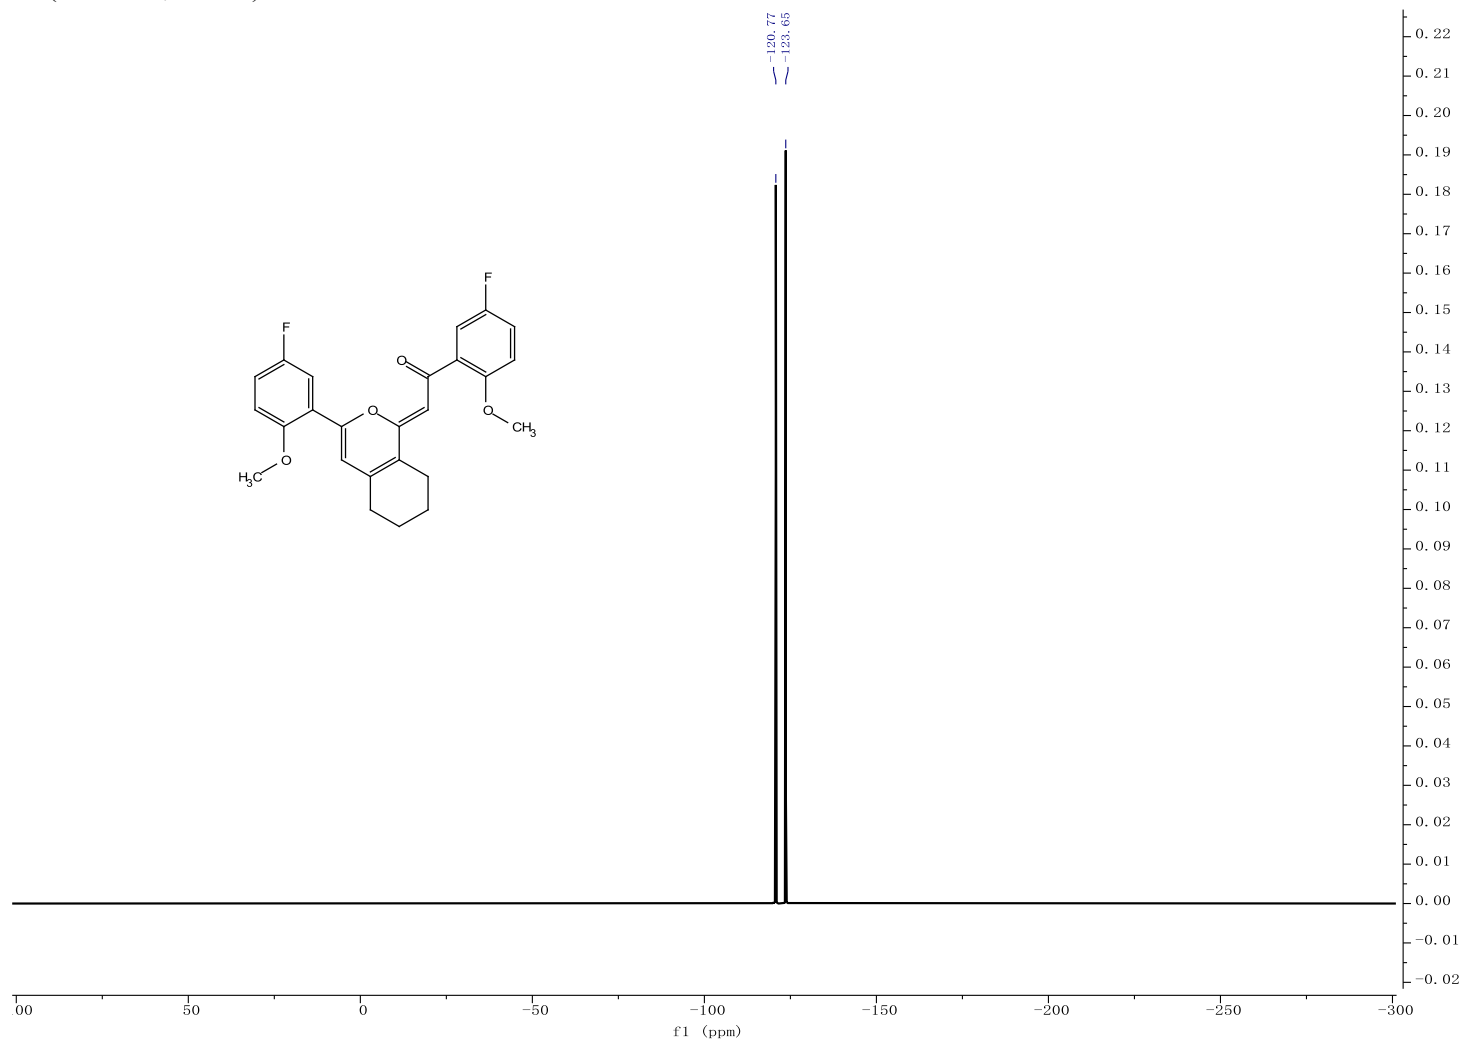

$^1\text{H}$  NMR (600 MHz,  $\text{CDCl}_3$ ) of **4g**

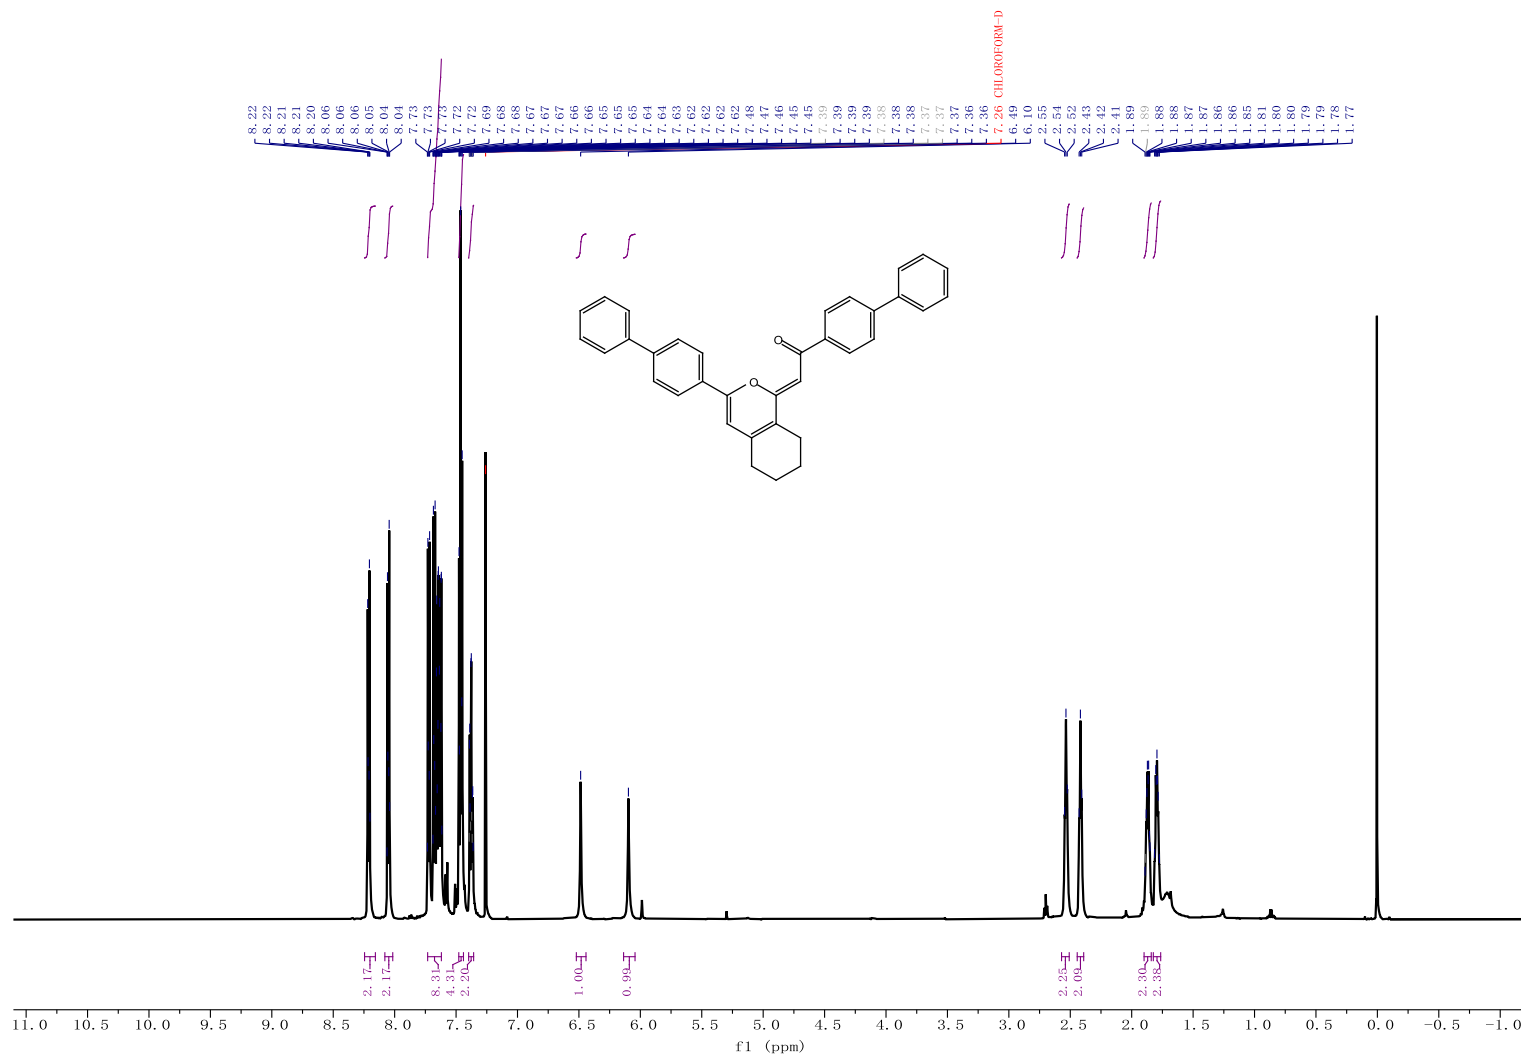

<sup>13</sup>C NMR (101 MHz, CDCl<sub>3</sub>) of **4g**

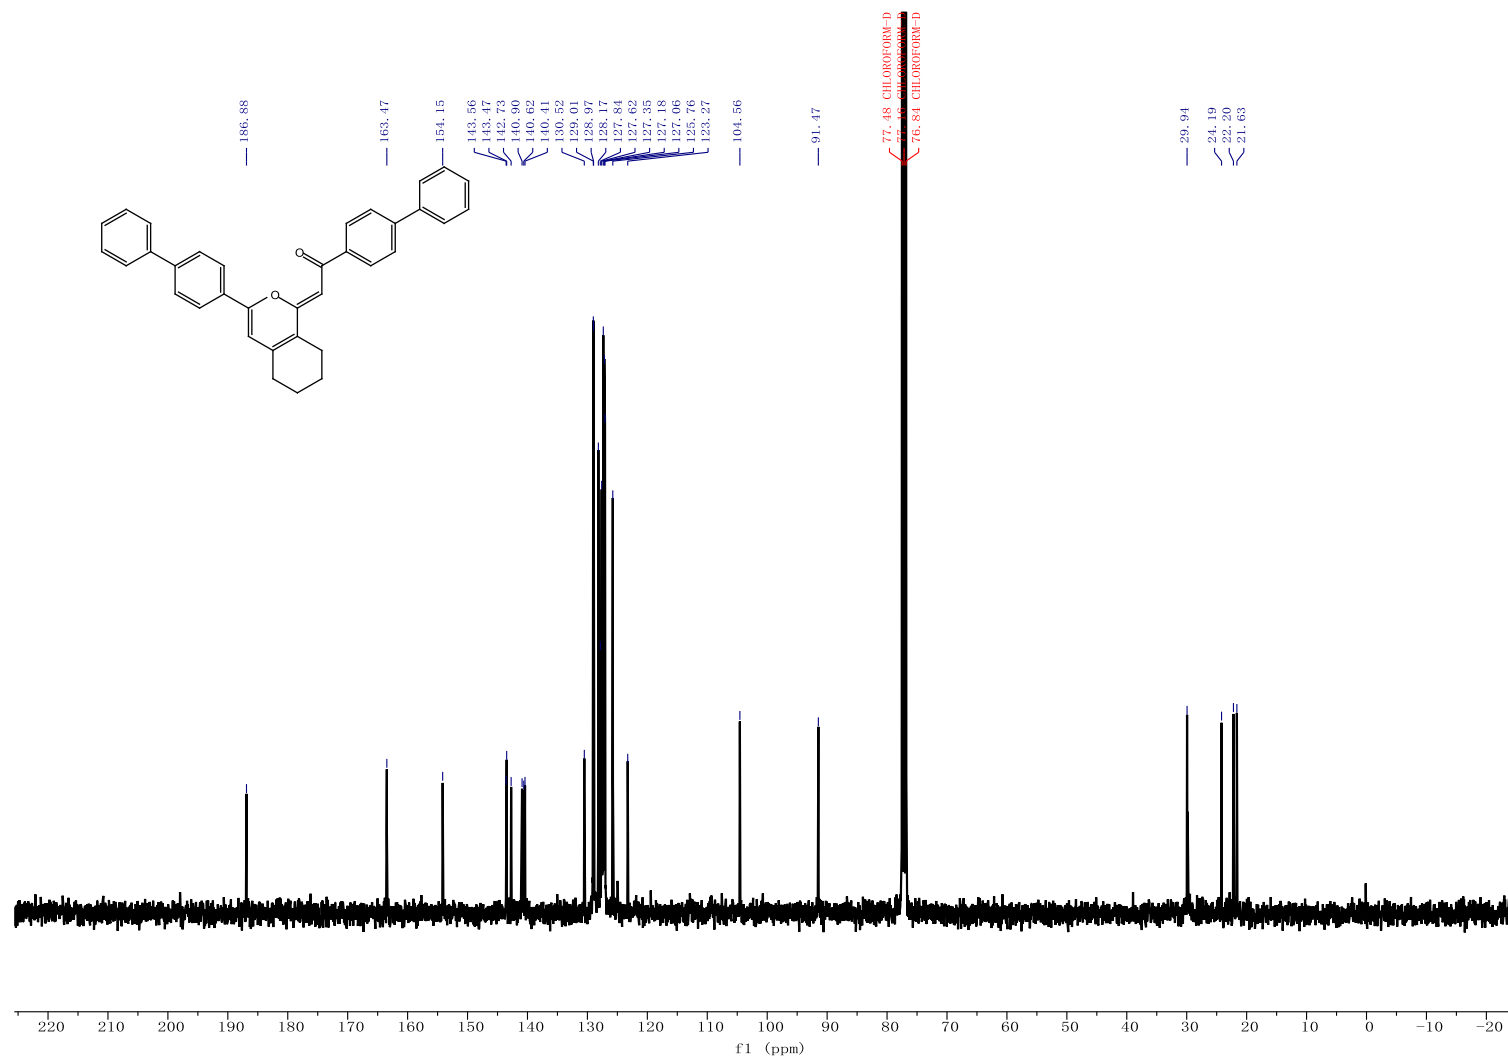

<sup>1</sup>H NMR (600 MHz, CD<sub>2</sub>Cl<sub>2</sub>) of **4h**

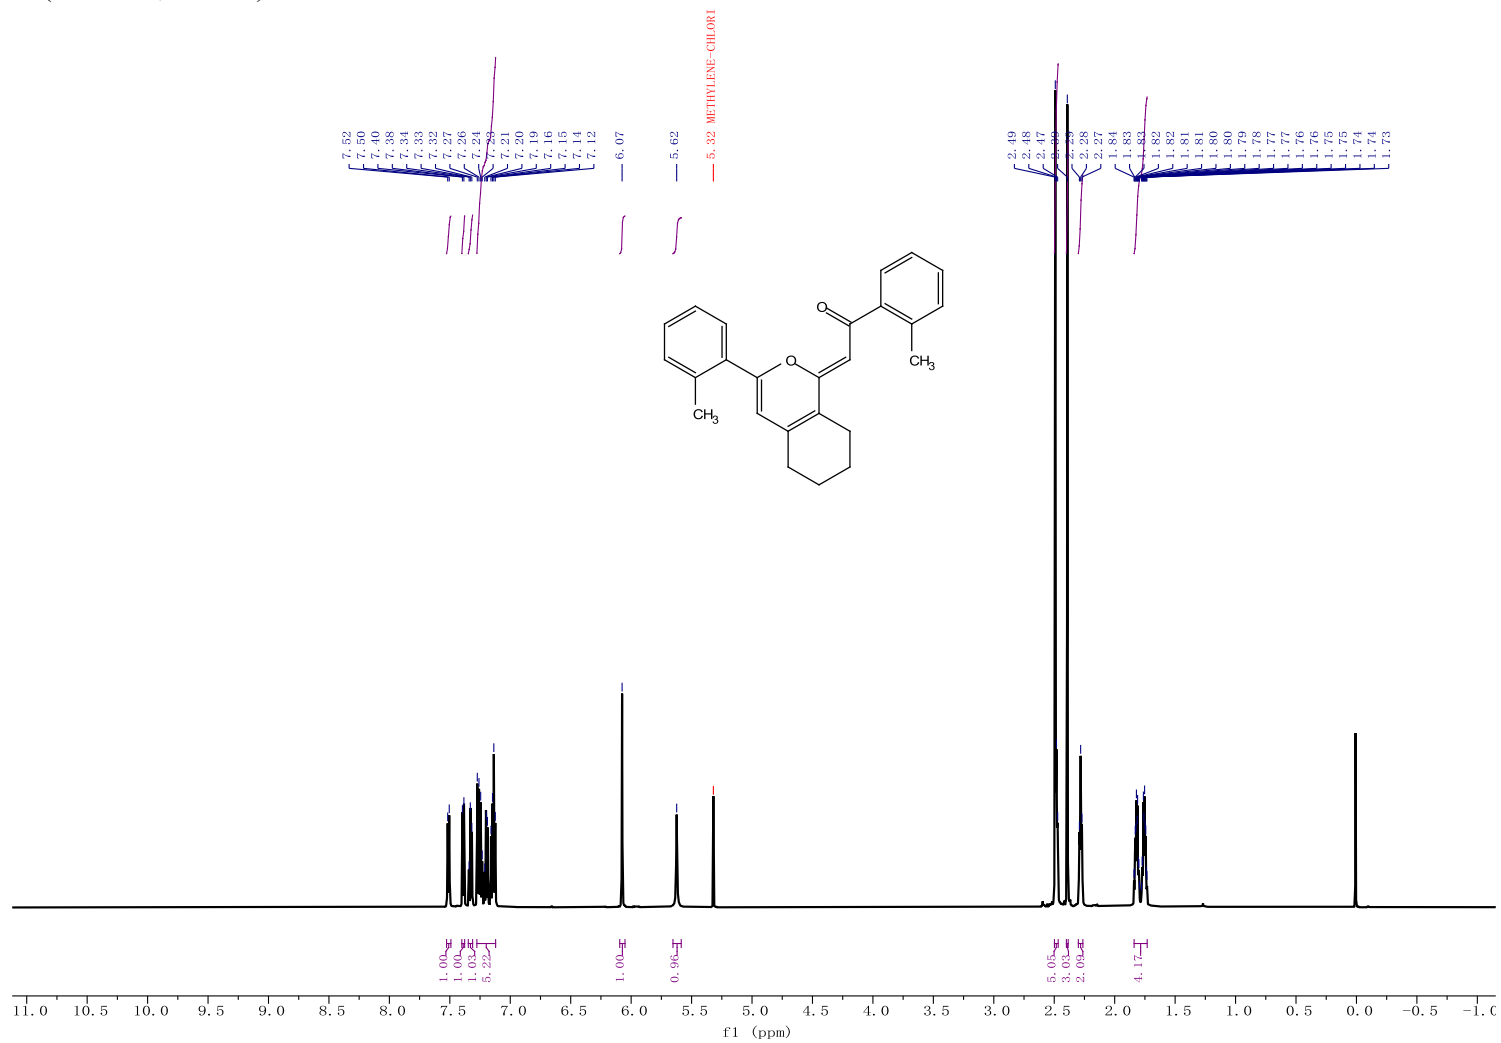

$^{13}\text{C}$  NMR (151 MHz,  $\text{CD}_2\text{Cl}_2$ ) of **4h**

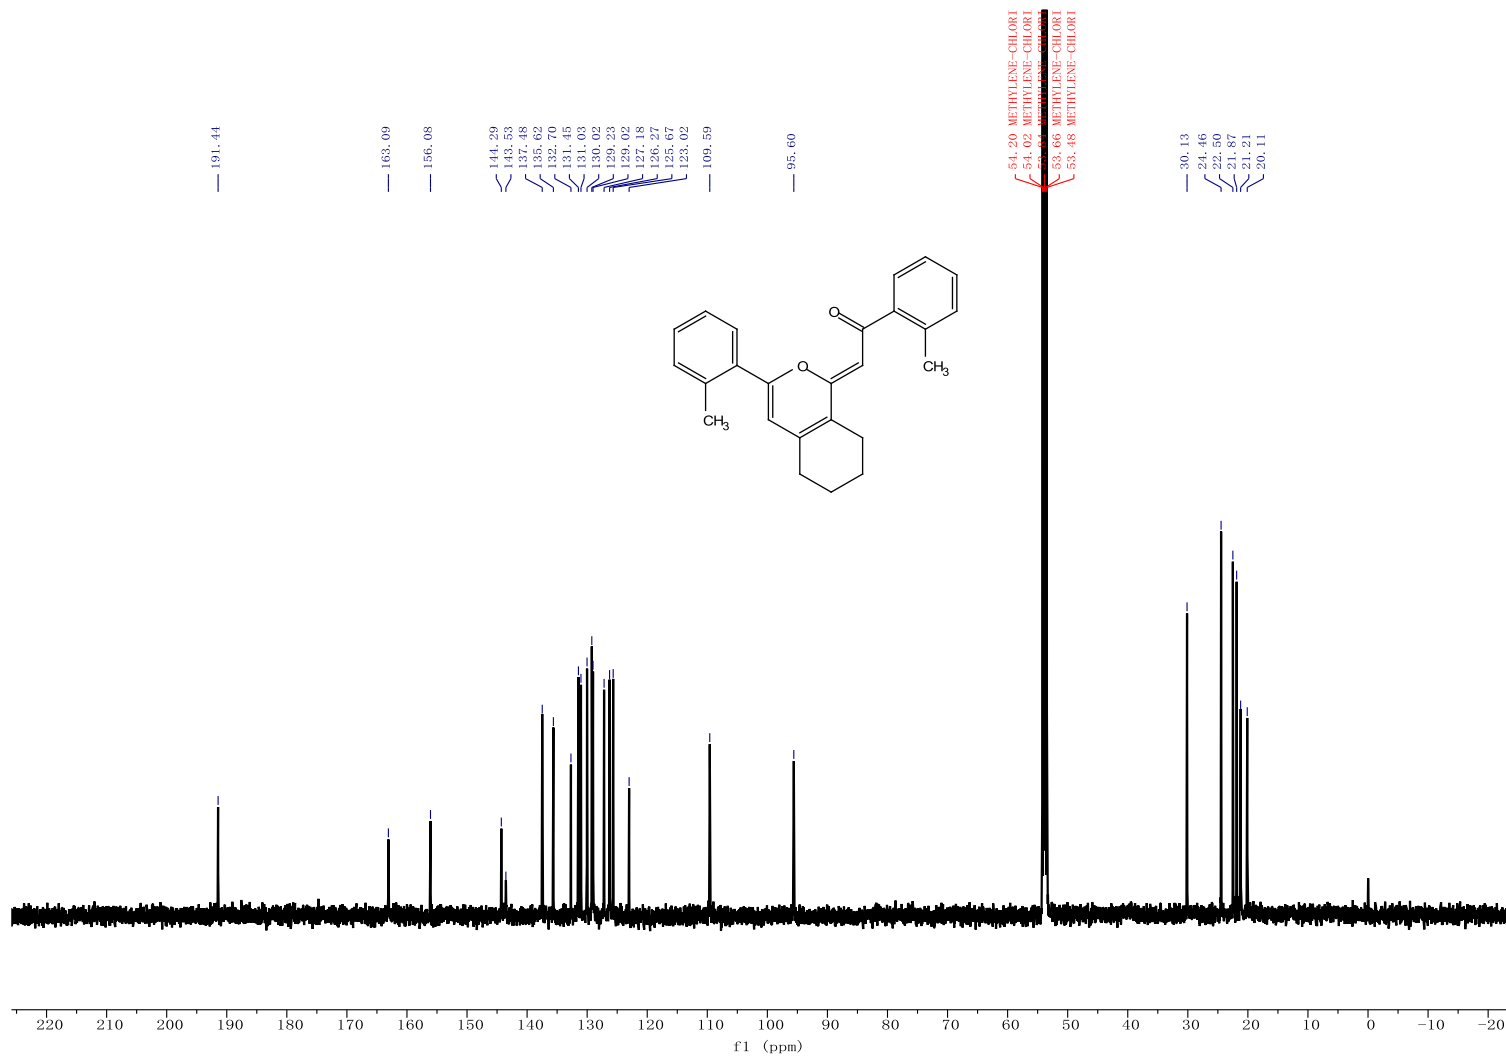

<sup>1</sup>H NMR (600 MHz, CDCl<sub>3</sub>) of **4i**

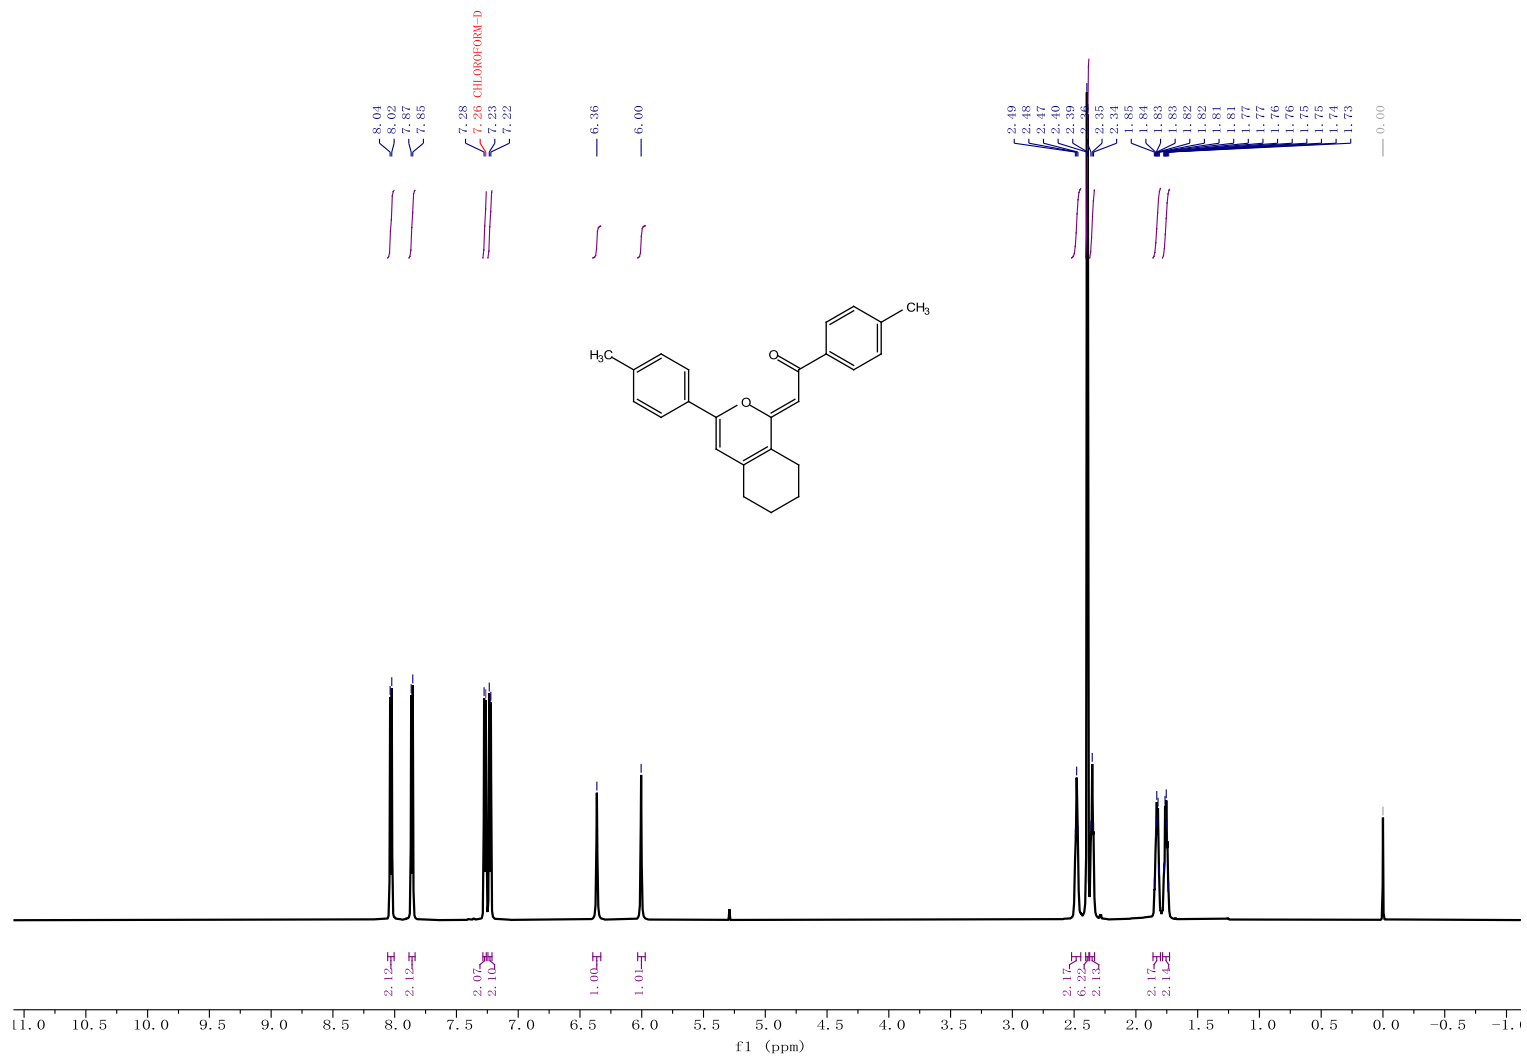

$^{13}\text{C}$  NMR (151 MHz,  $\text{CDCl}_3$ ) of **4i**

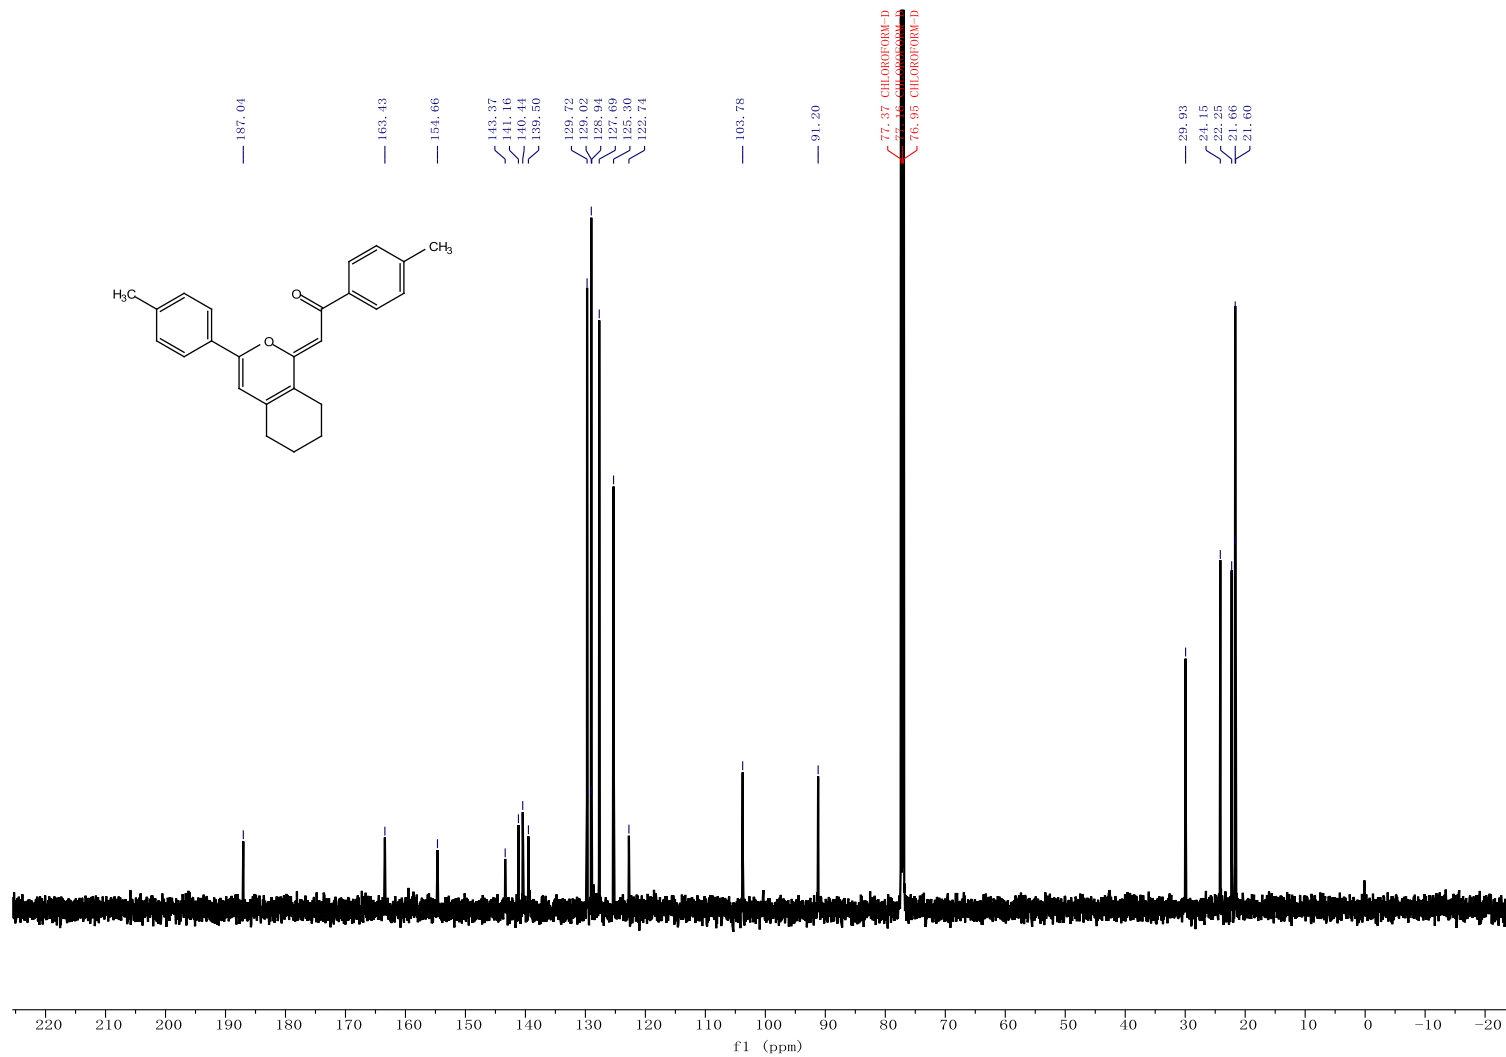



$^1\text{H}$  NMR (600 MHz,  $\text{CDCl}_3$ ) of **4j**

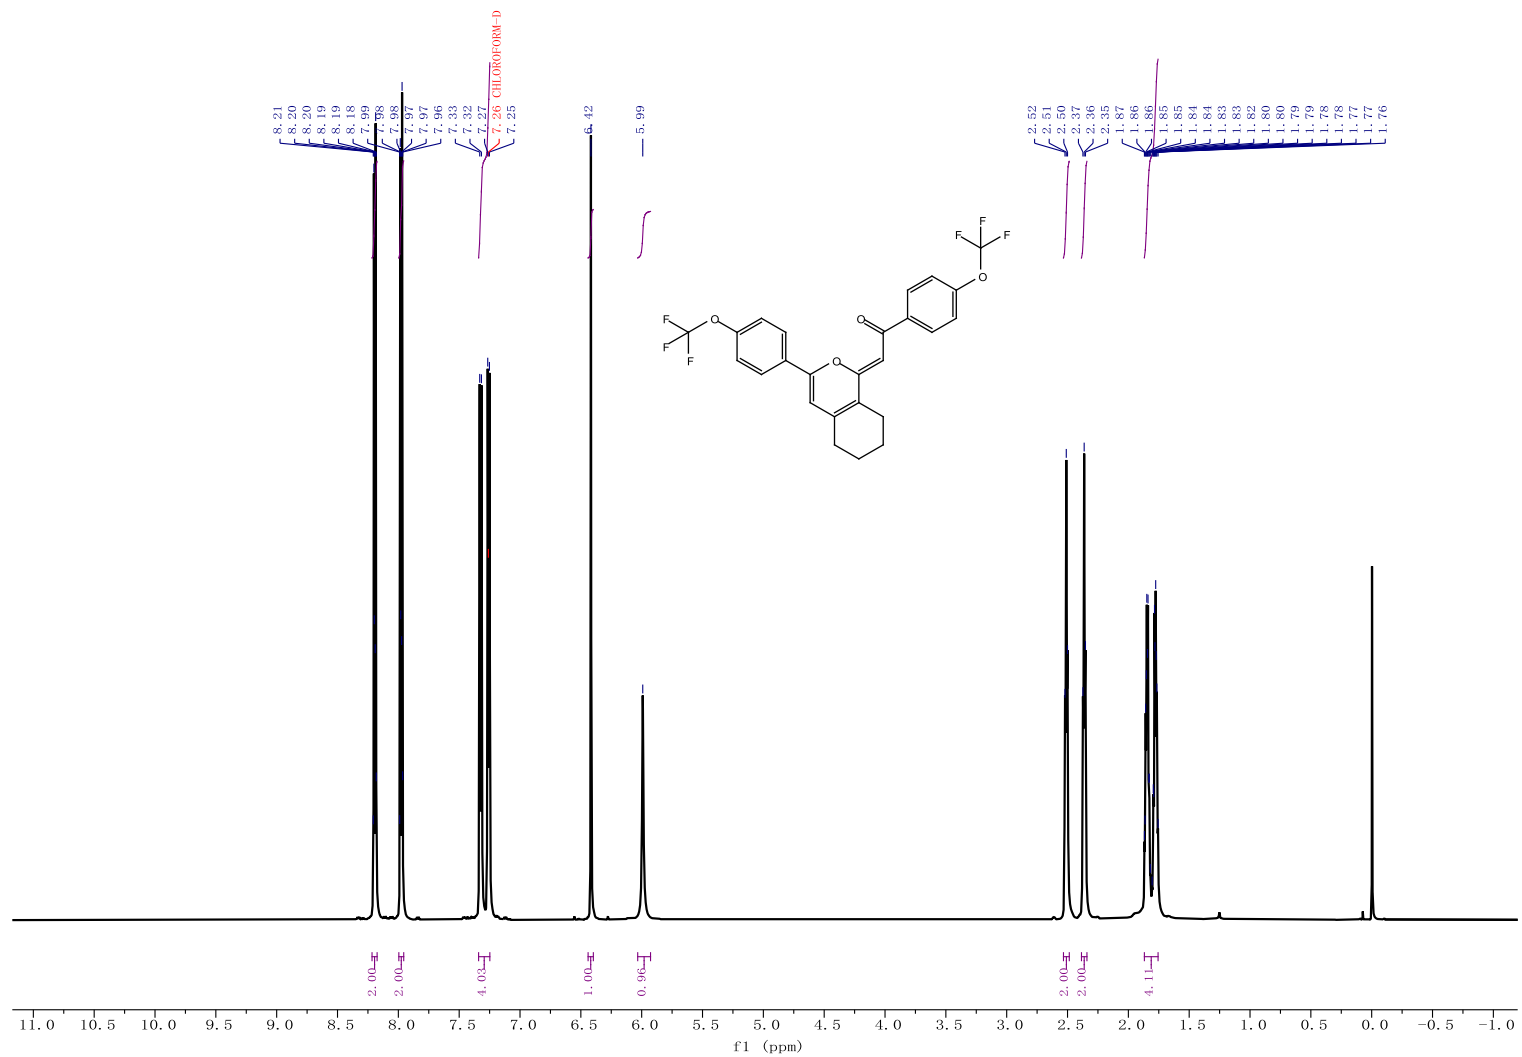

$^{13}\text{C}$  NMR (151 MHz,  $\text{CDCl}_3$ ) of **4j**

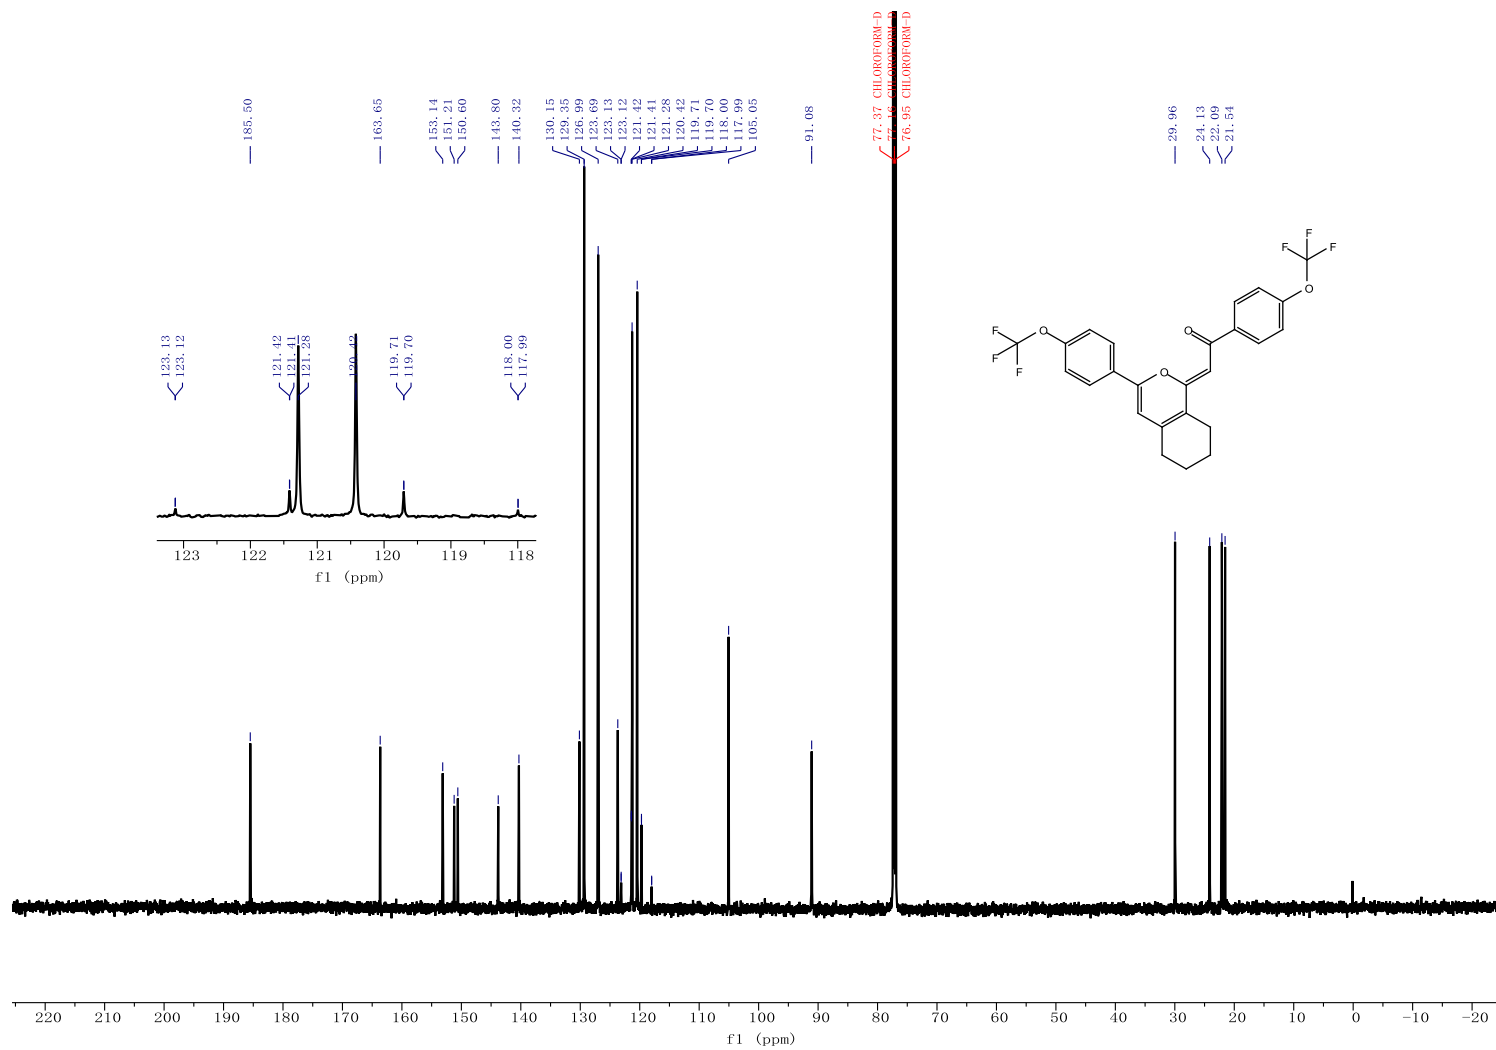

$^{19}\text{F}$  NMR (565 MHz,  $\text{CDCl}_3$ ) of **4j**

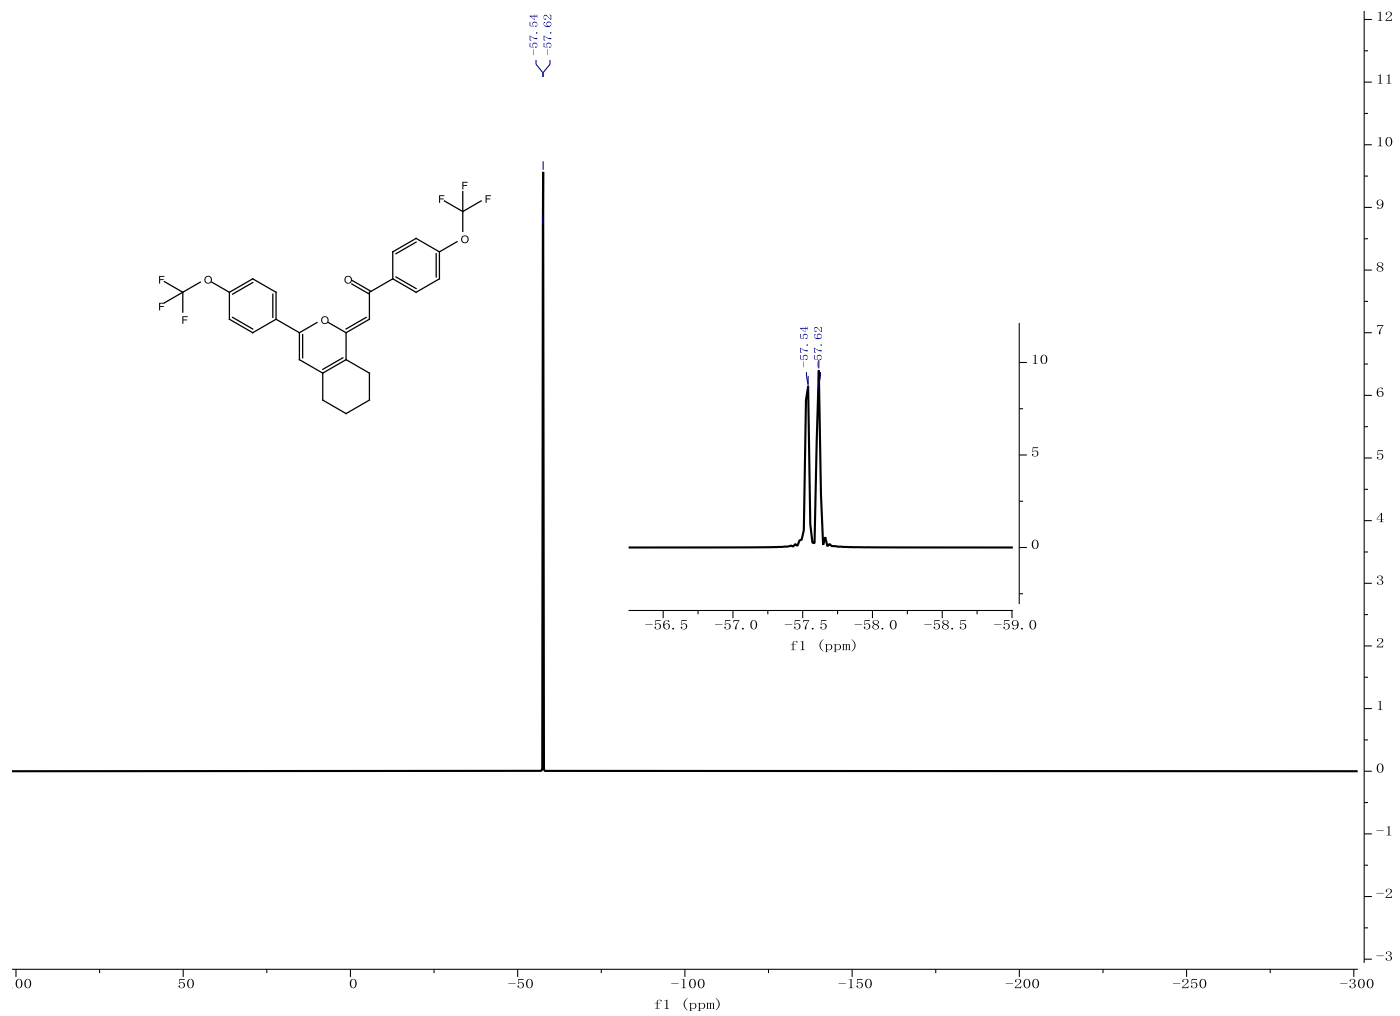

<sup>1</sup>H NMR (600 MHz, CDCl<sub>3</sub>) of **4k**

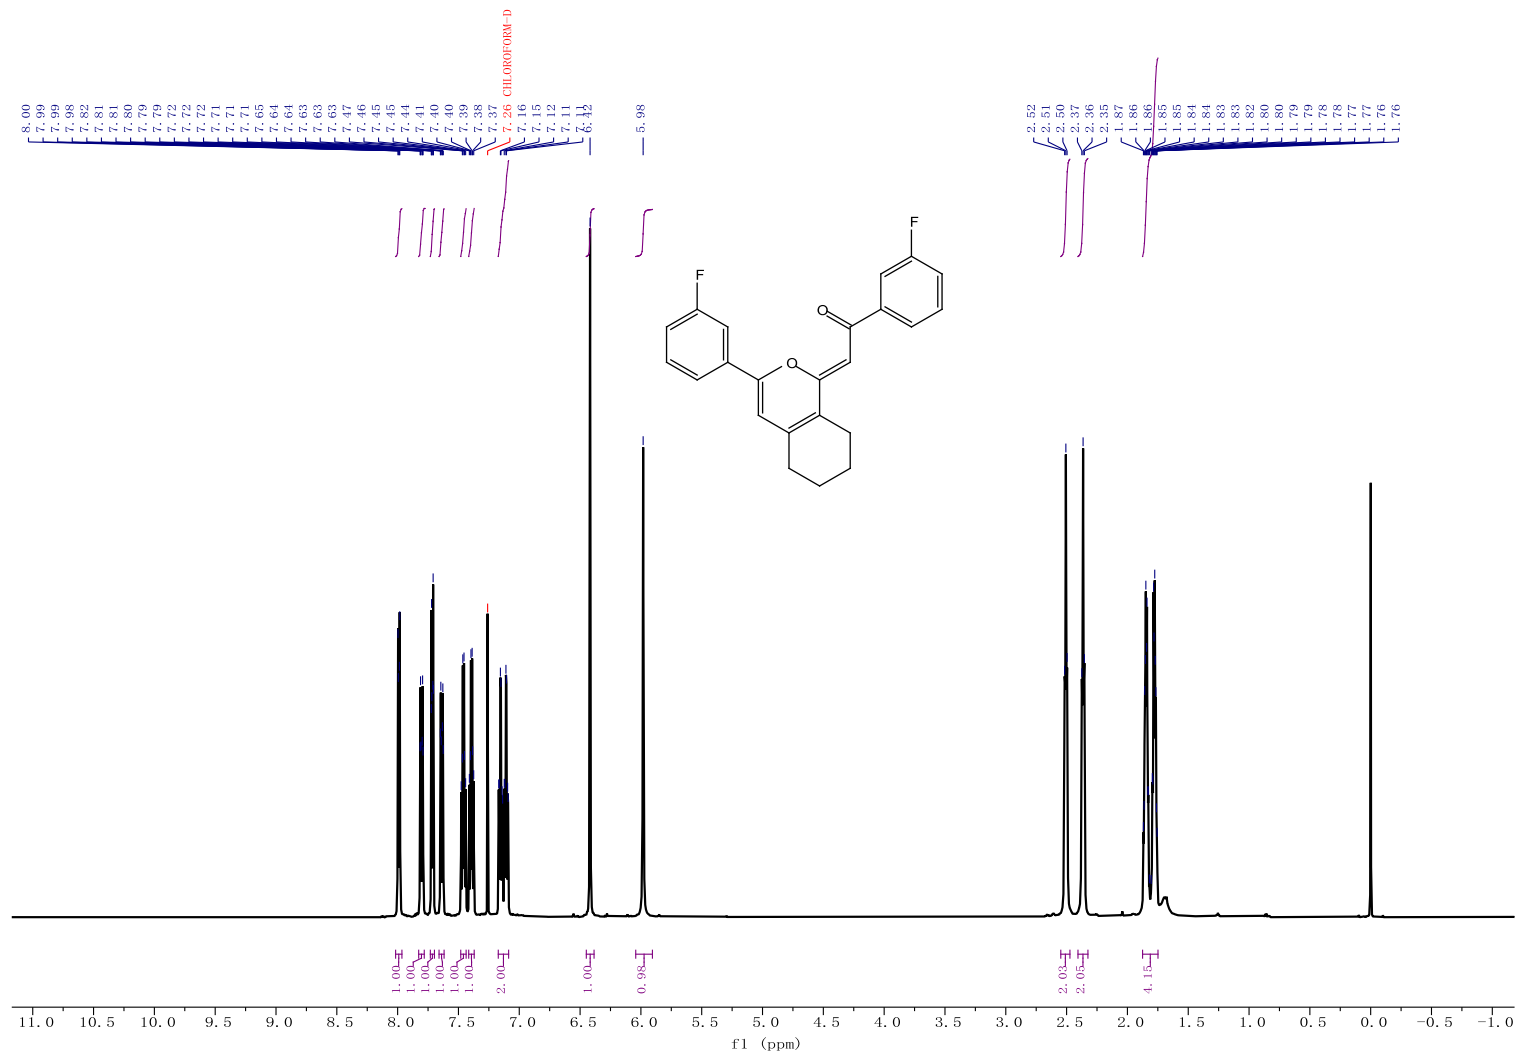

$^{13}\text{C}$  NMR (151 MHz,  $\text{CDCl}_3$ ) of **4k**

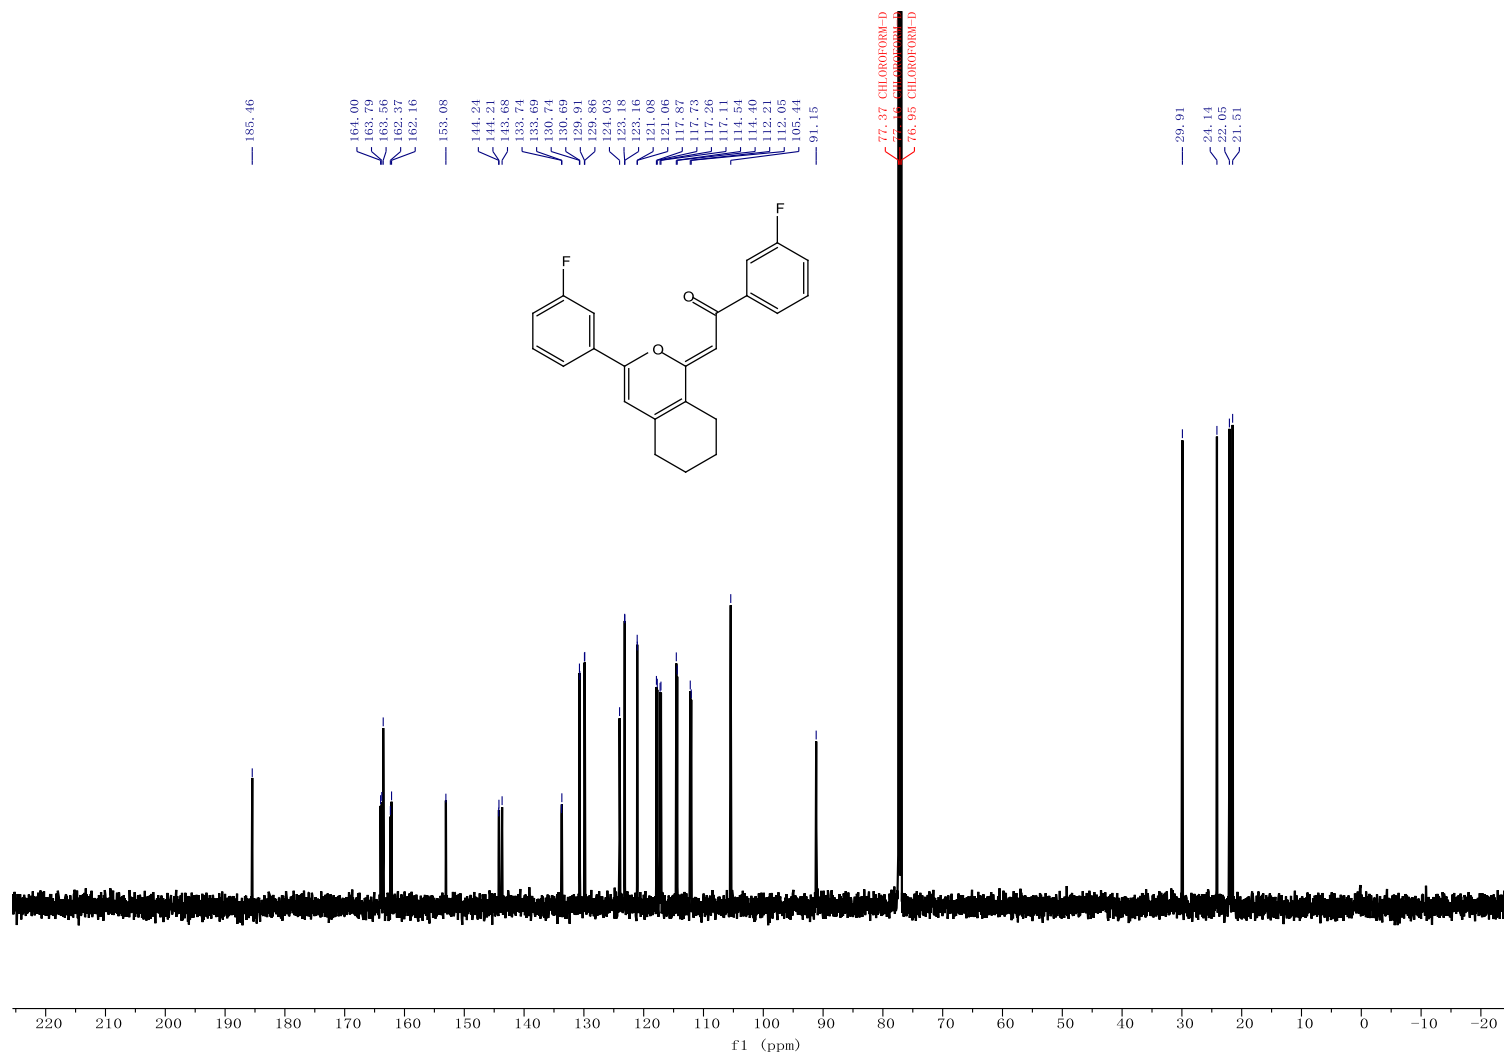

$^{19}\text{F}$  NMR (565 MHz,  $\text{CDCl}_3$ ) of **4k**

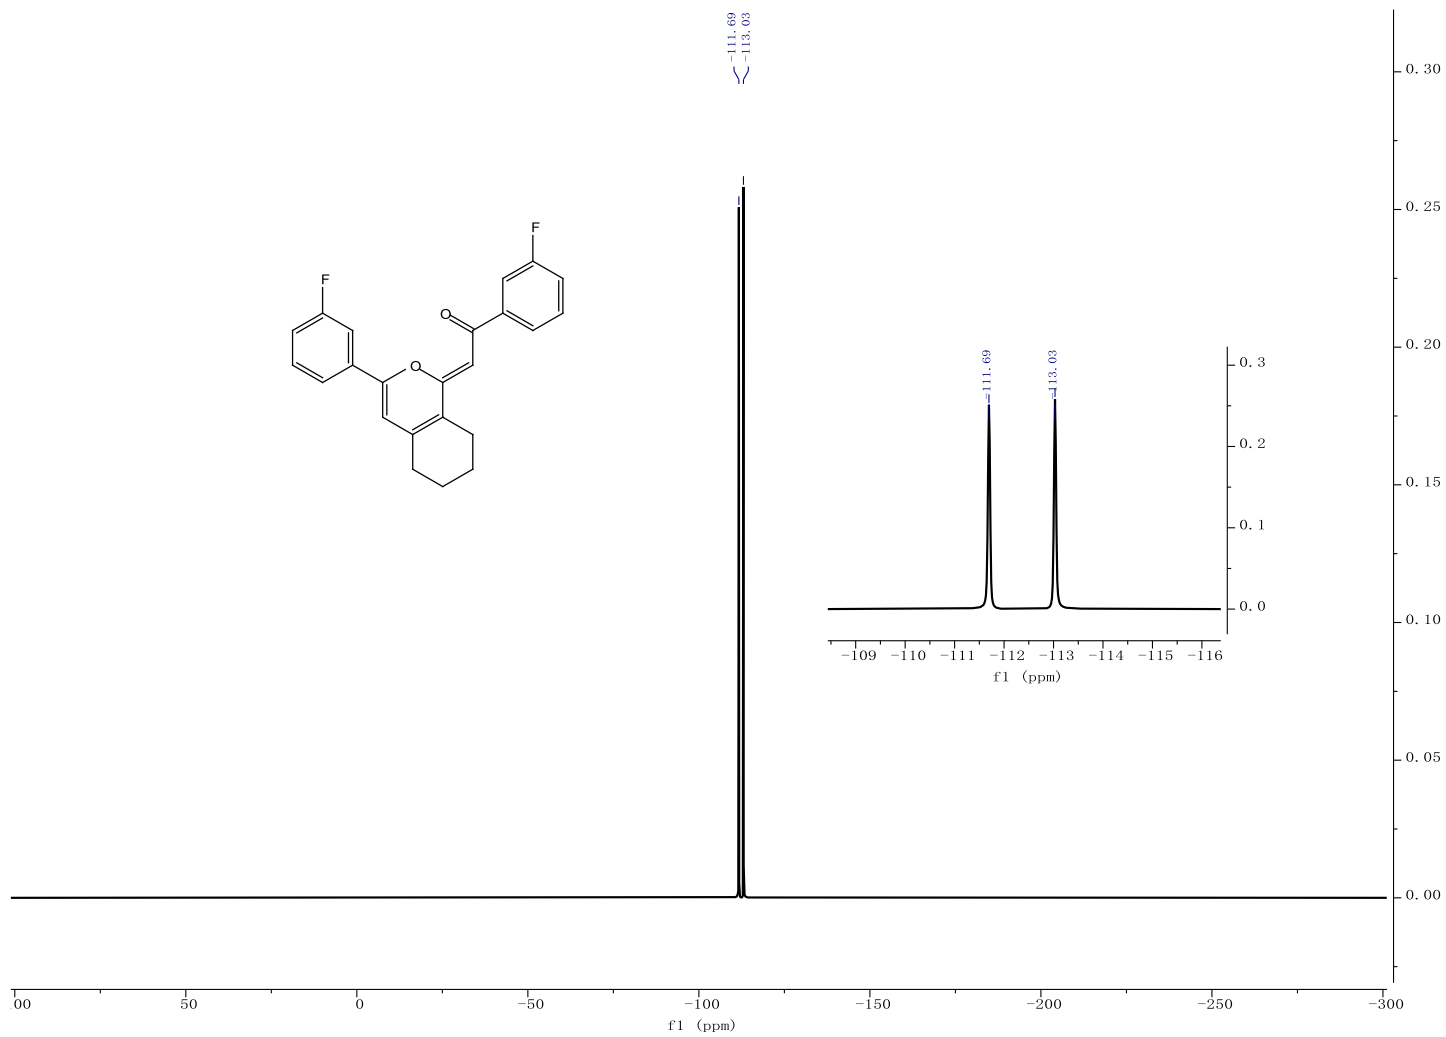

<sup>1</sup>H NMR (600 MHz, CDCl<sub>3</sub>) of **4I**

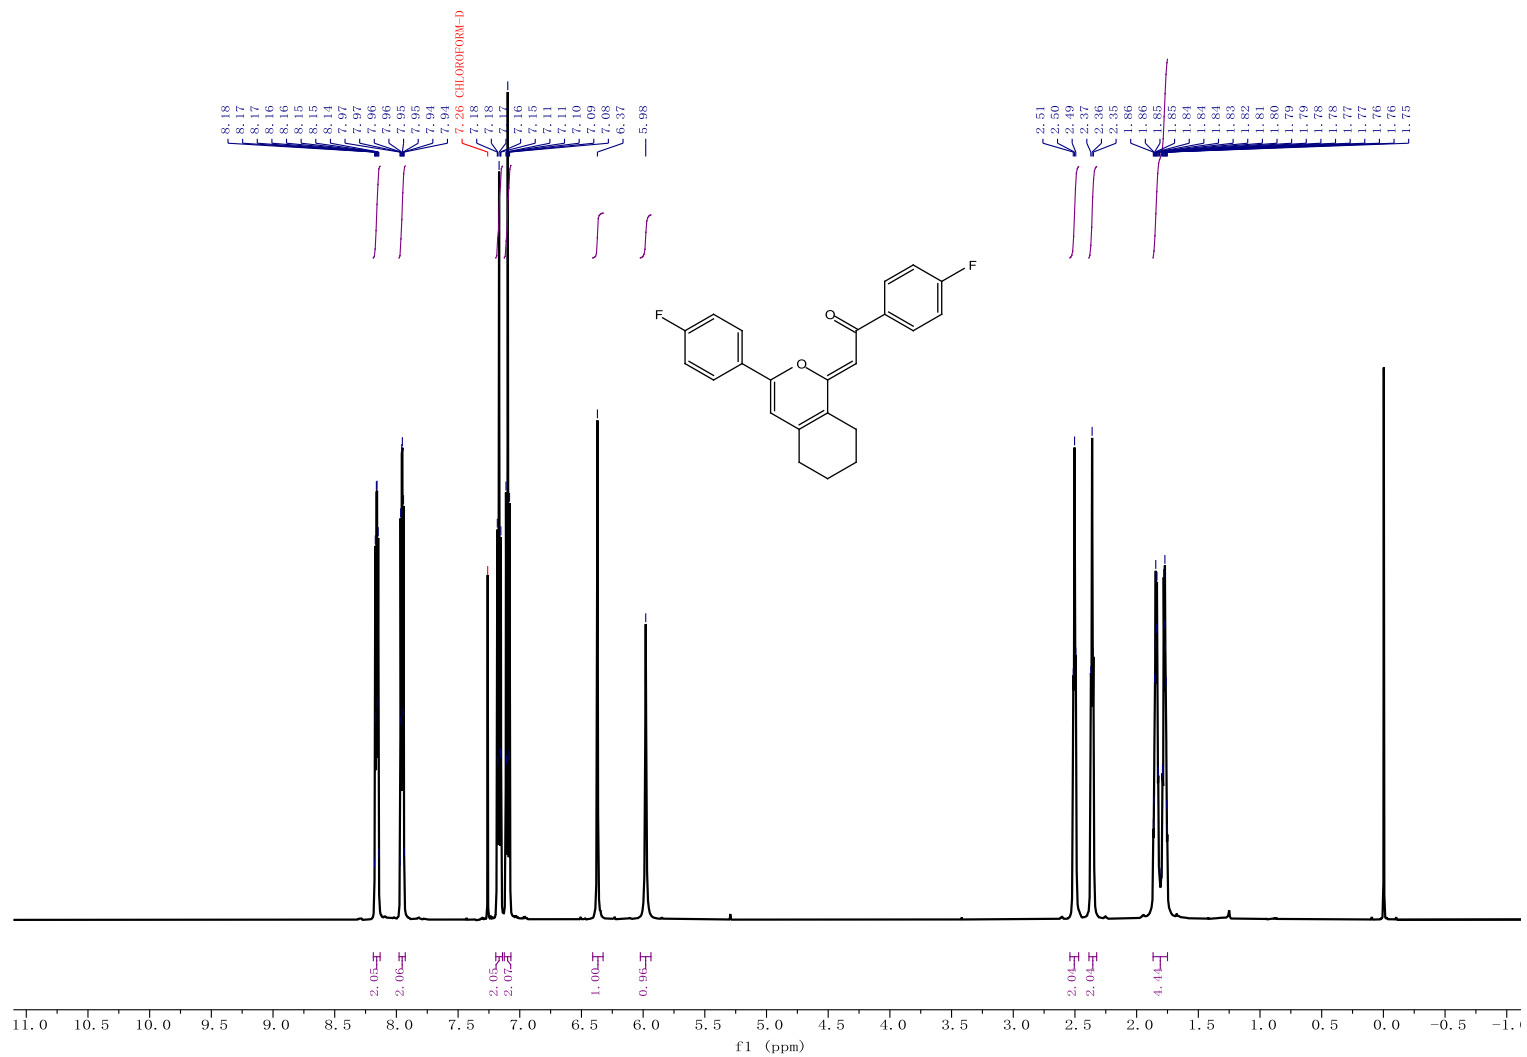

$^{13}\text{C}$  NMR (151 MHz,  $\text{CDCl}_3$ ) of **41**

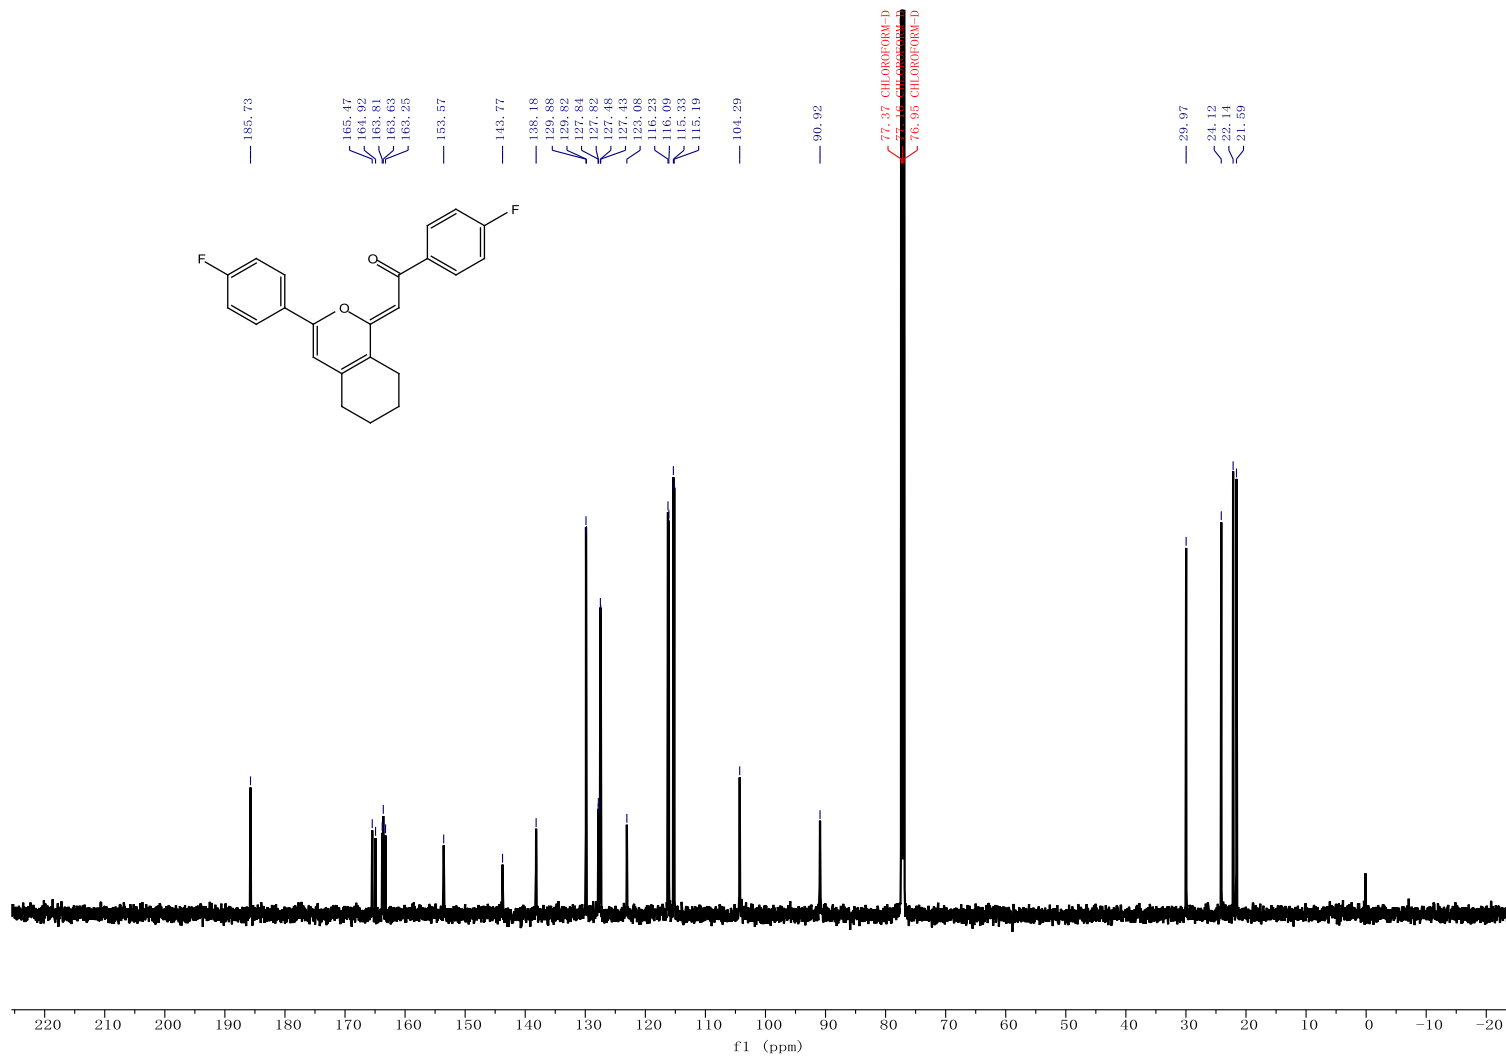



$^{19}\text{F}$  NMR (565 MHz,  $\text{CDCl}_3$ ) of **41**

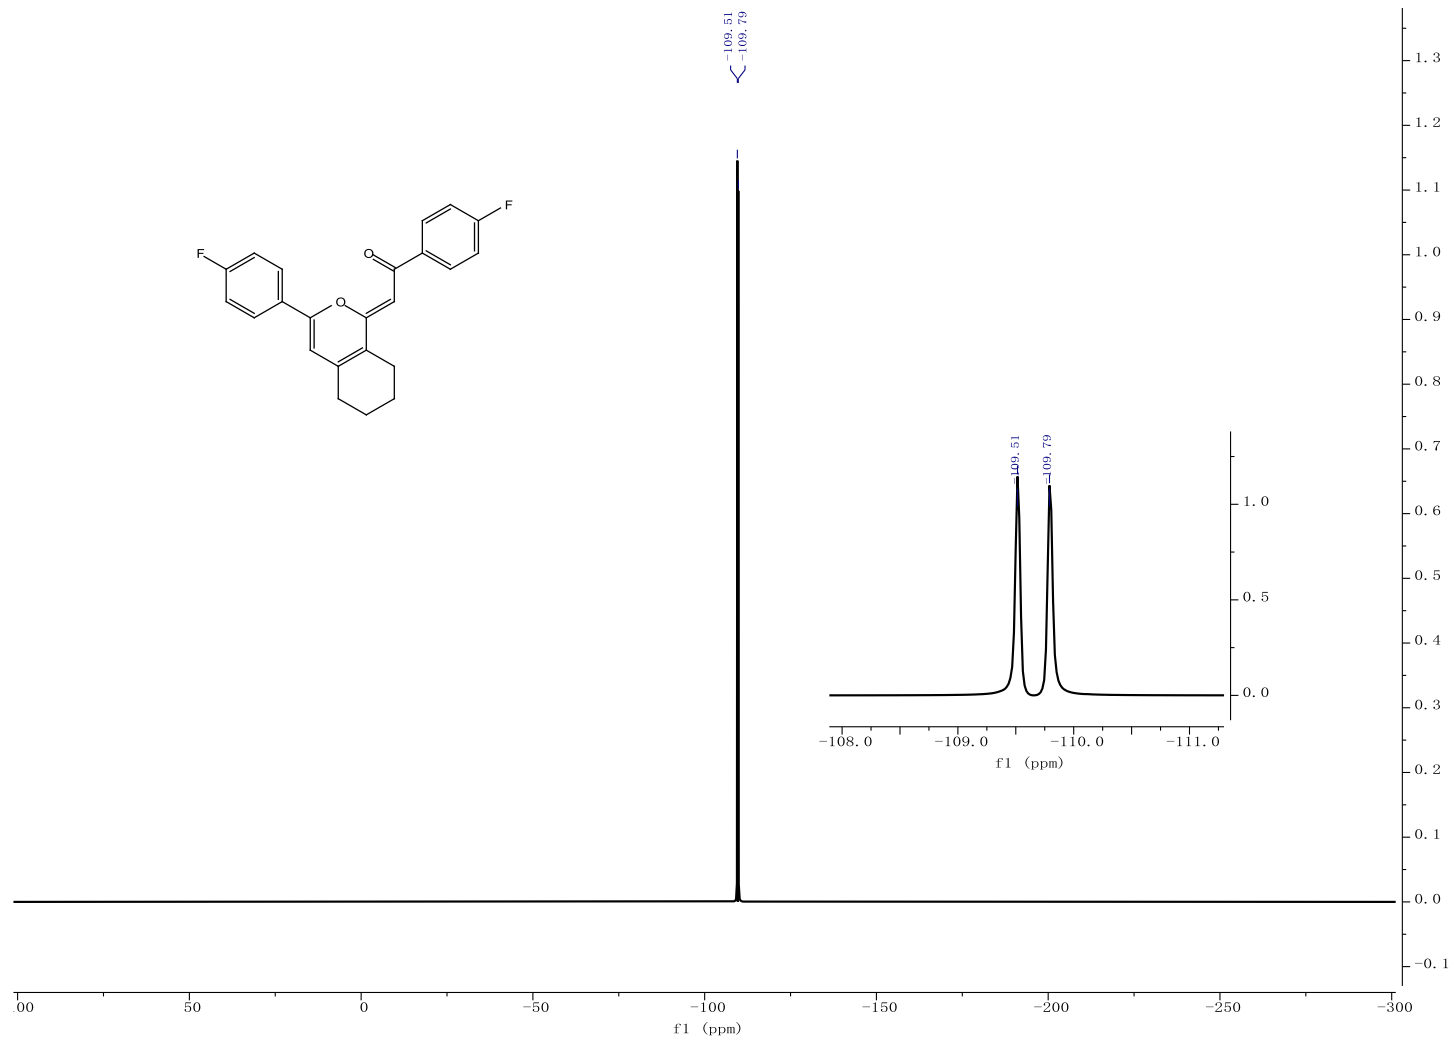

$^1\text{H}$  NMR (600 MHz,  $\text{CDCl}_3$ ) of **4m**

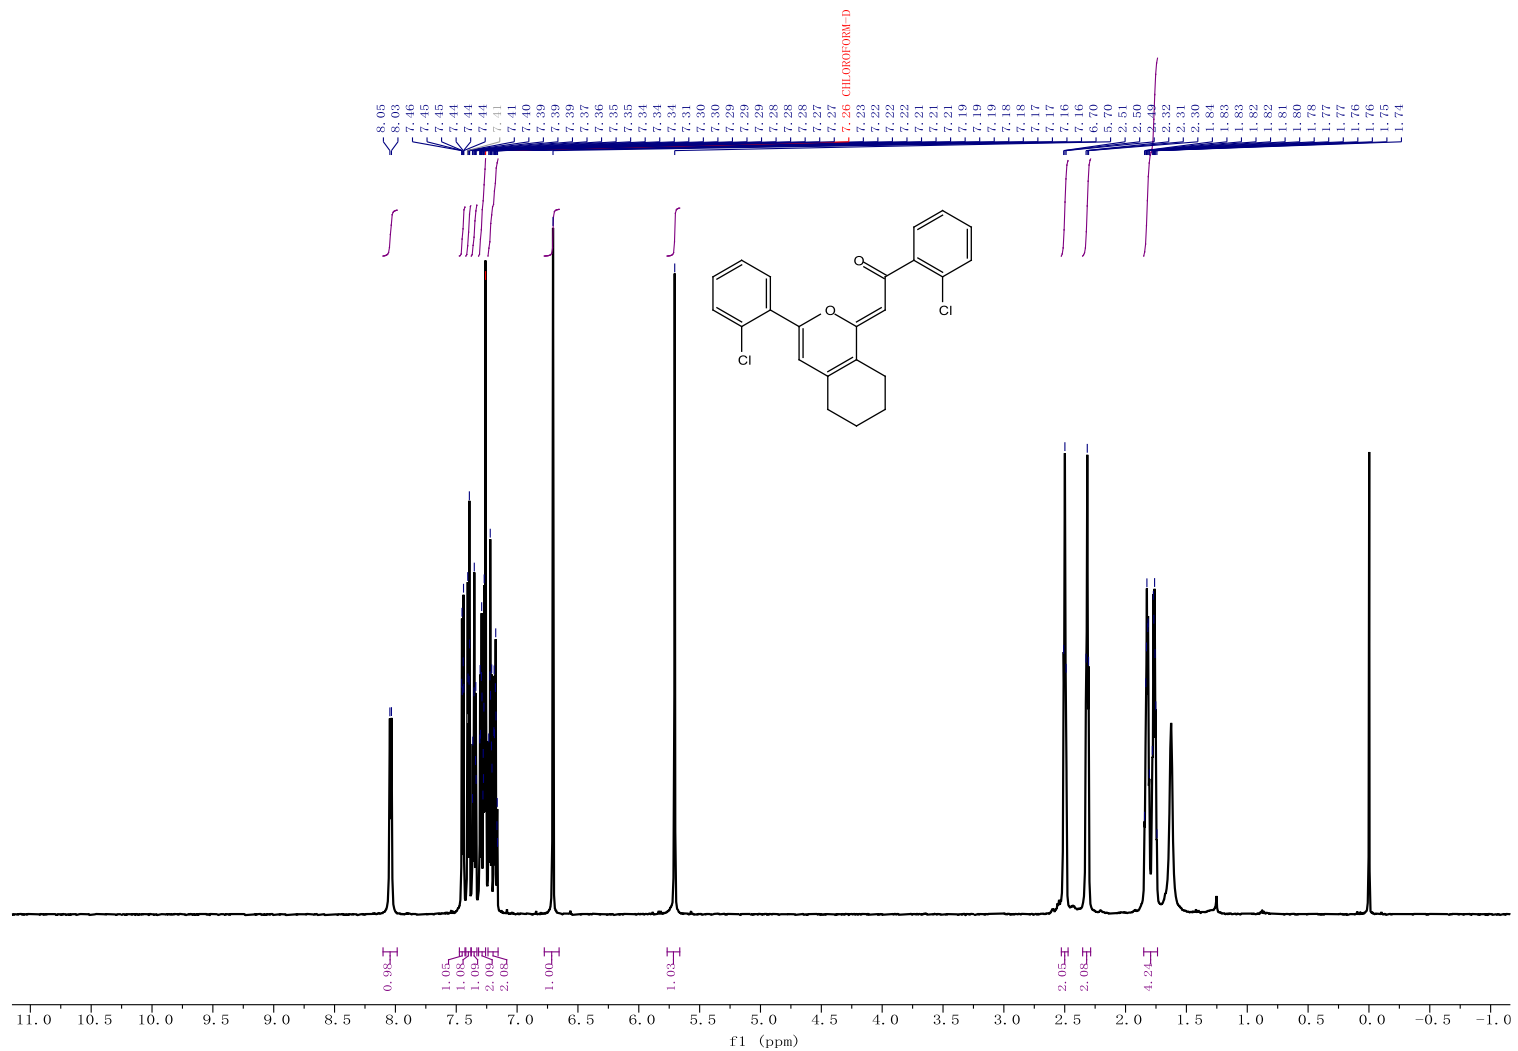

<sup>13</sup>C NMR (151 MHz, CDCl<sub>3</sub>) of **4m**

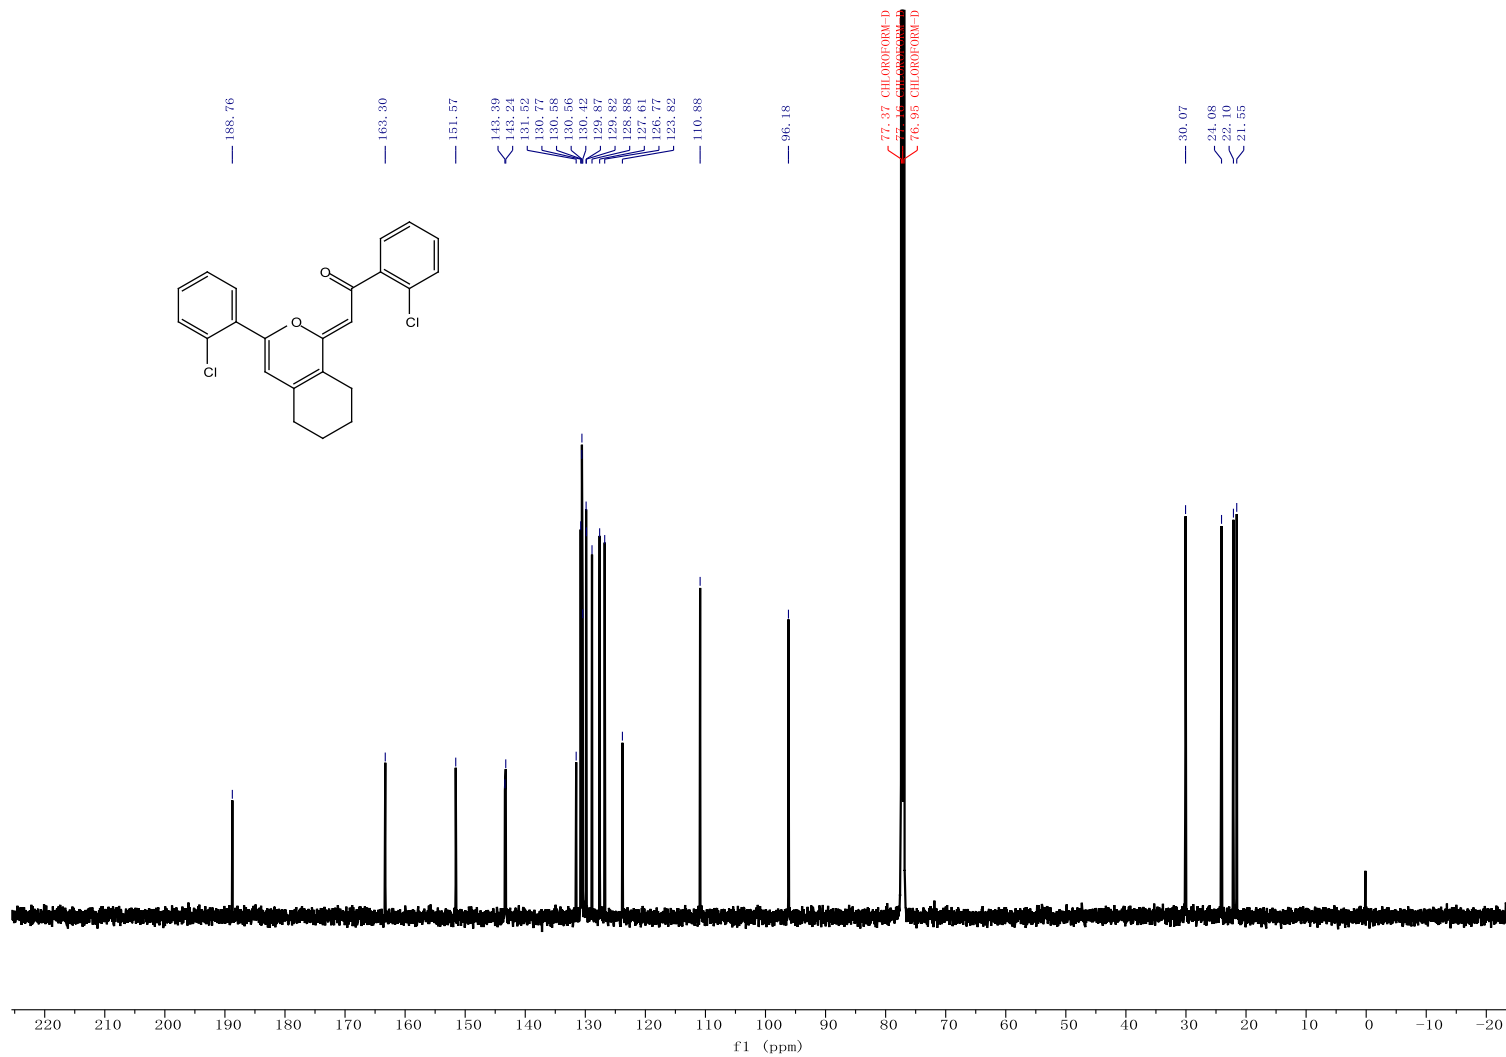

$^1\text{H}$  NMR (600 MHz,  $\text{CDCl}_3$ ) of **4n**

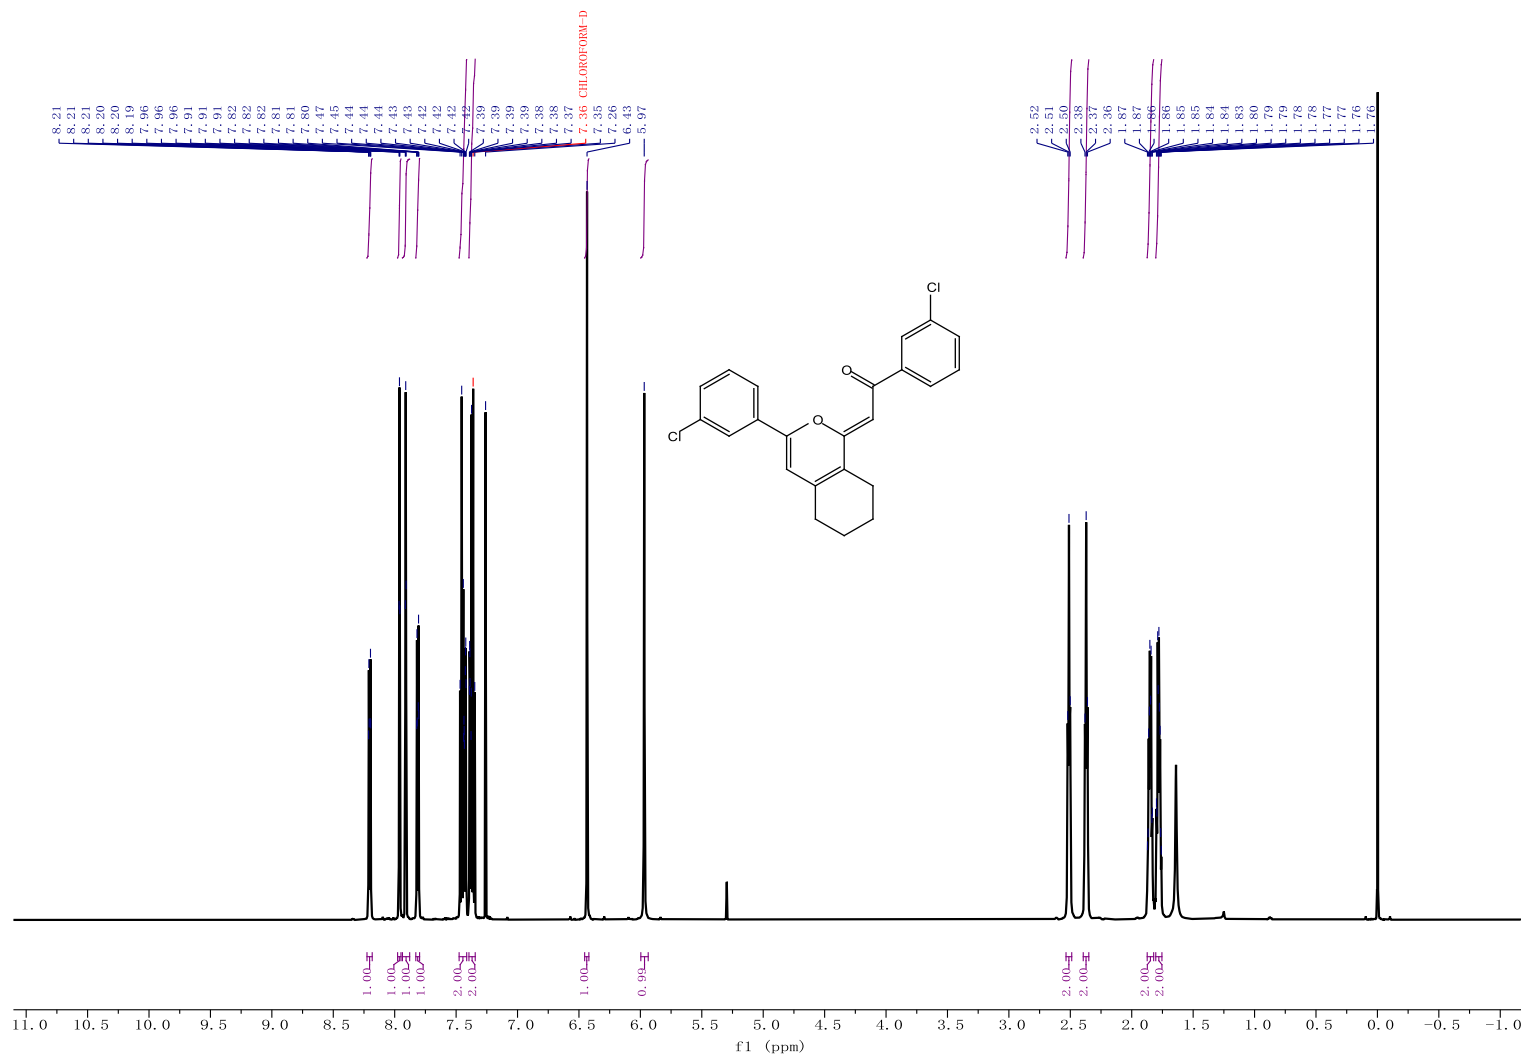

$^{13}\text{C}$  NMR (151 MHz,  $\text{CDCl}_3$ ) of **4n**

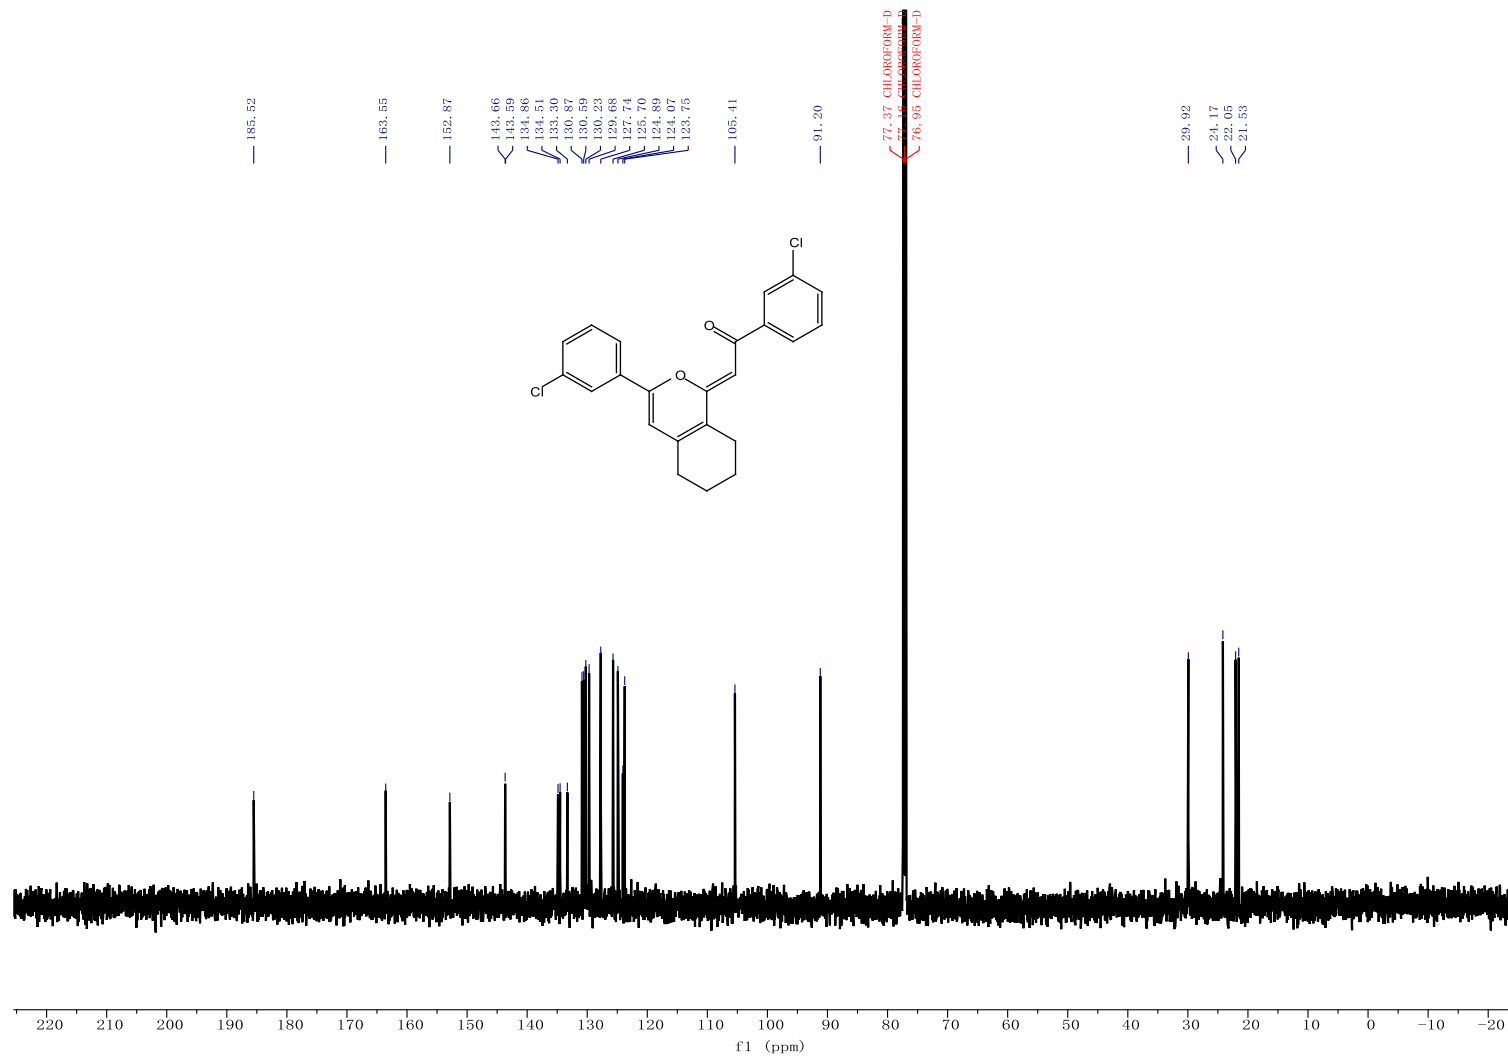

<sup>1</sup>H NMR (600 MHz, CDCl<sub>3</sub>) of **4o**

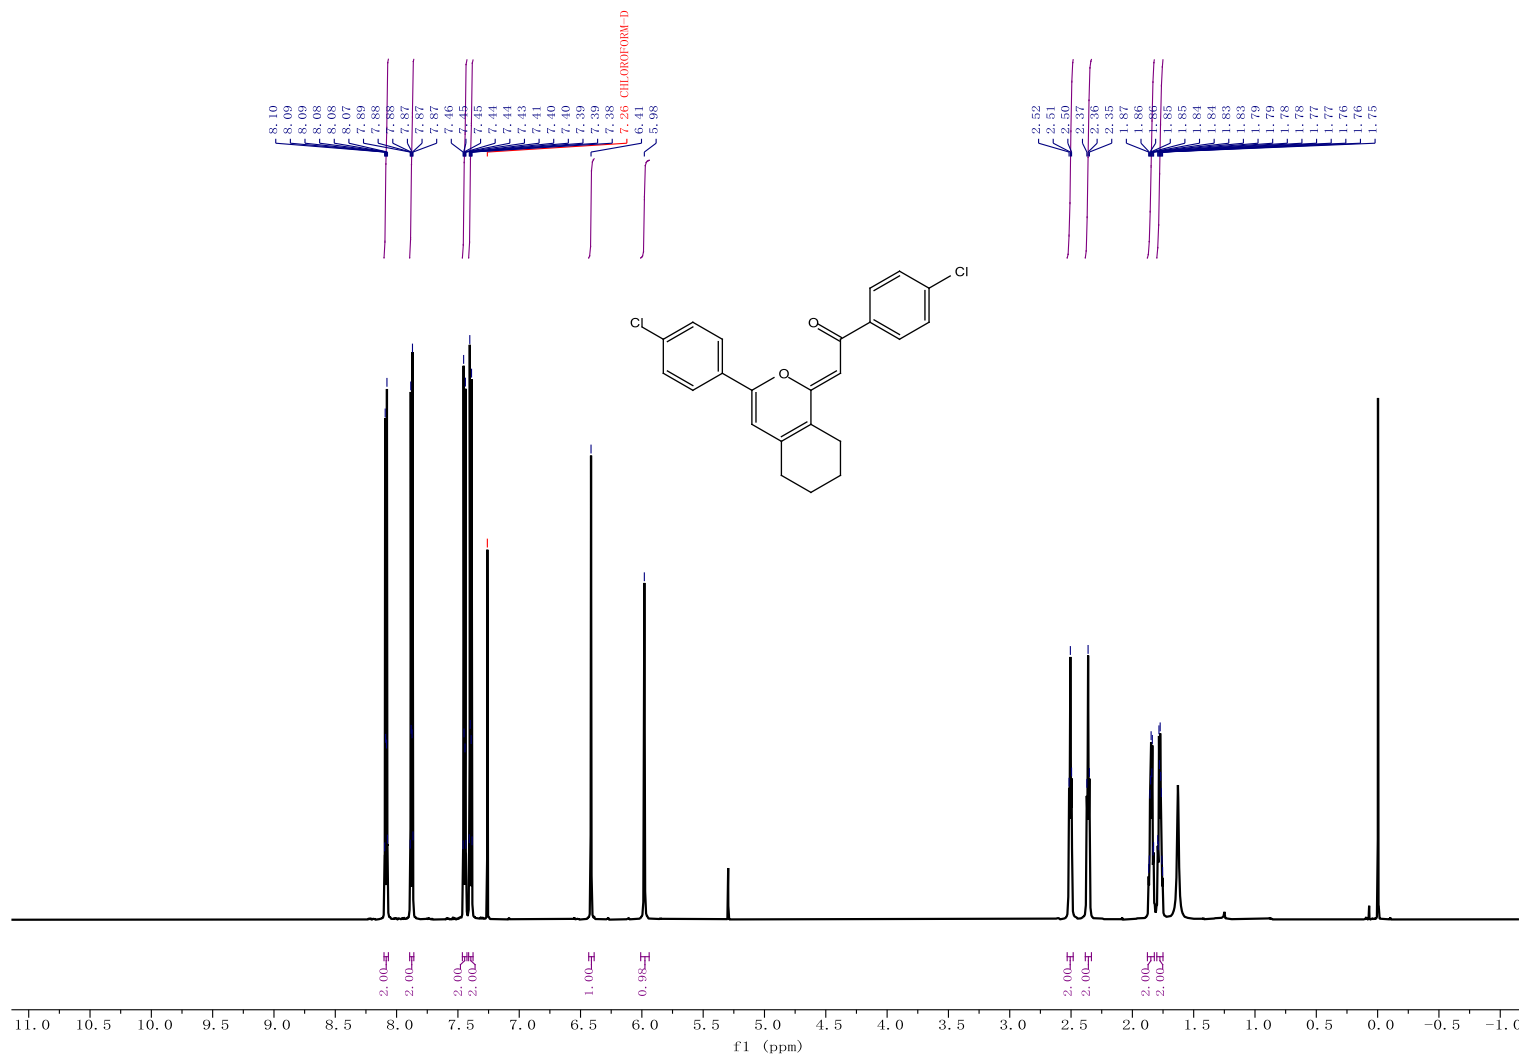

$^{13}\text{C}$  NMR (151 MHz,  $\text{CDCl}_3$ ) of **4o**

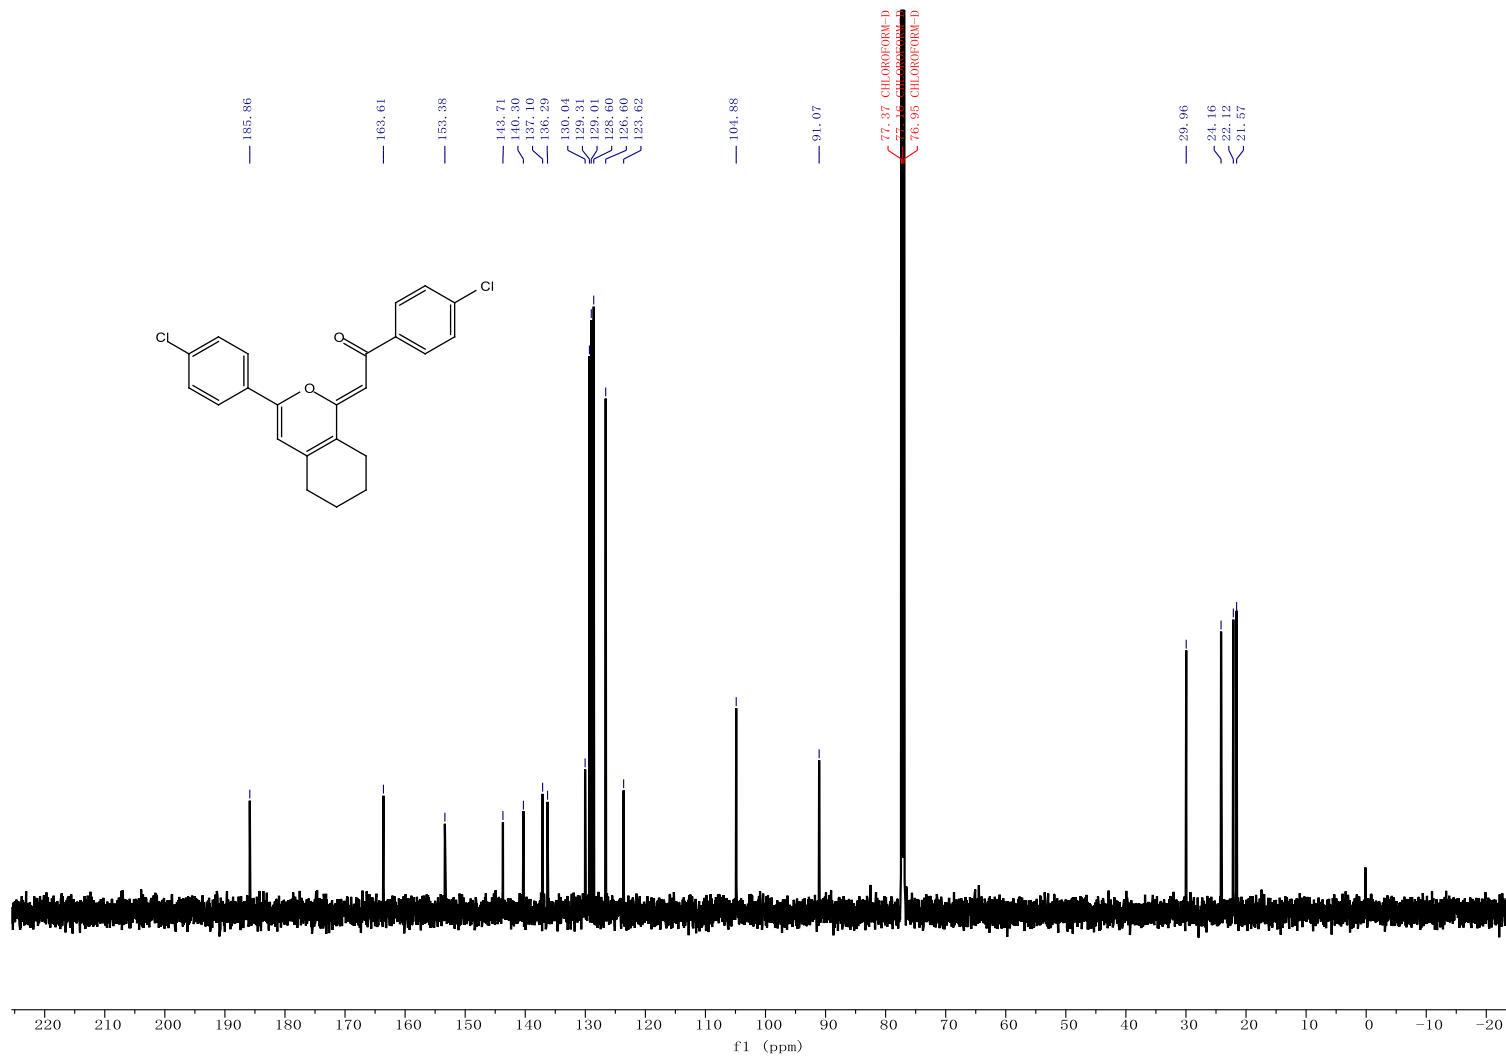

<sup>1</sup>H NMR (600 MHz, CDCl<sub>3</sub>) of **4p**

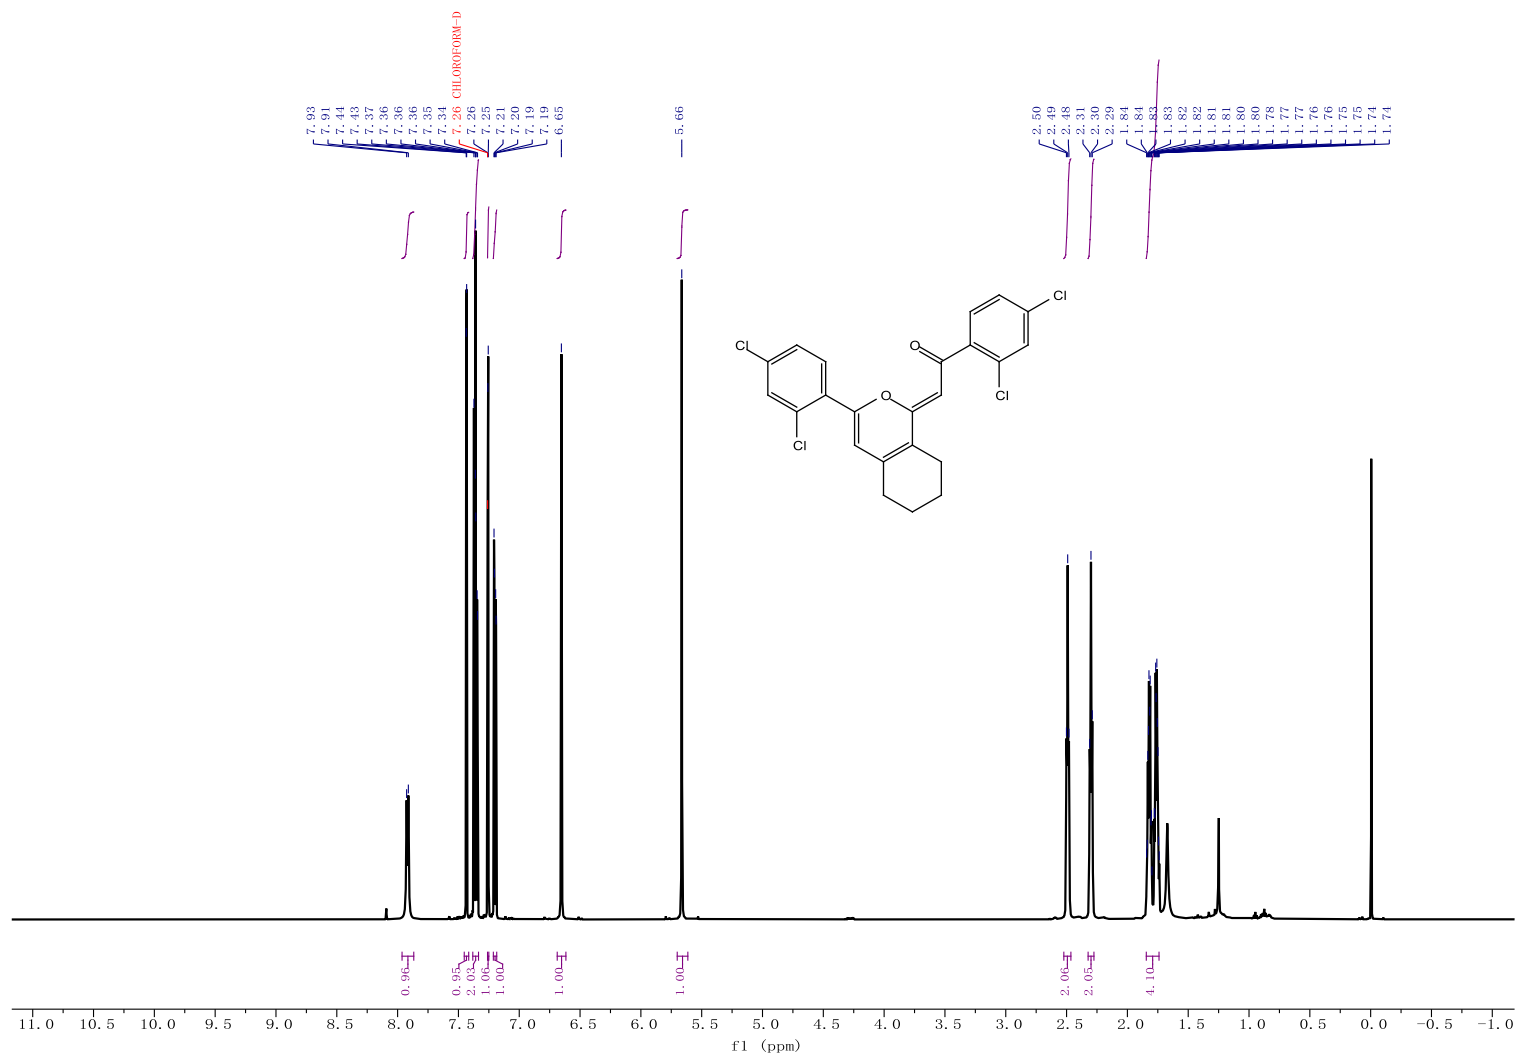



<sup>13</sup>C NMR (151 MHz, CDCl<sub>3</sub>) of **4p**

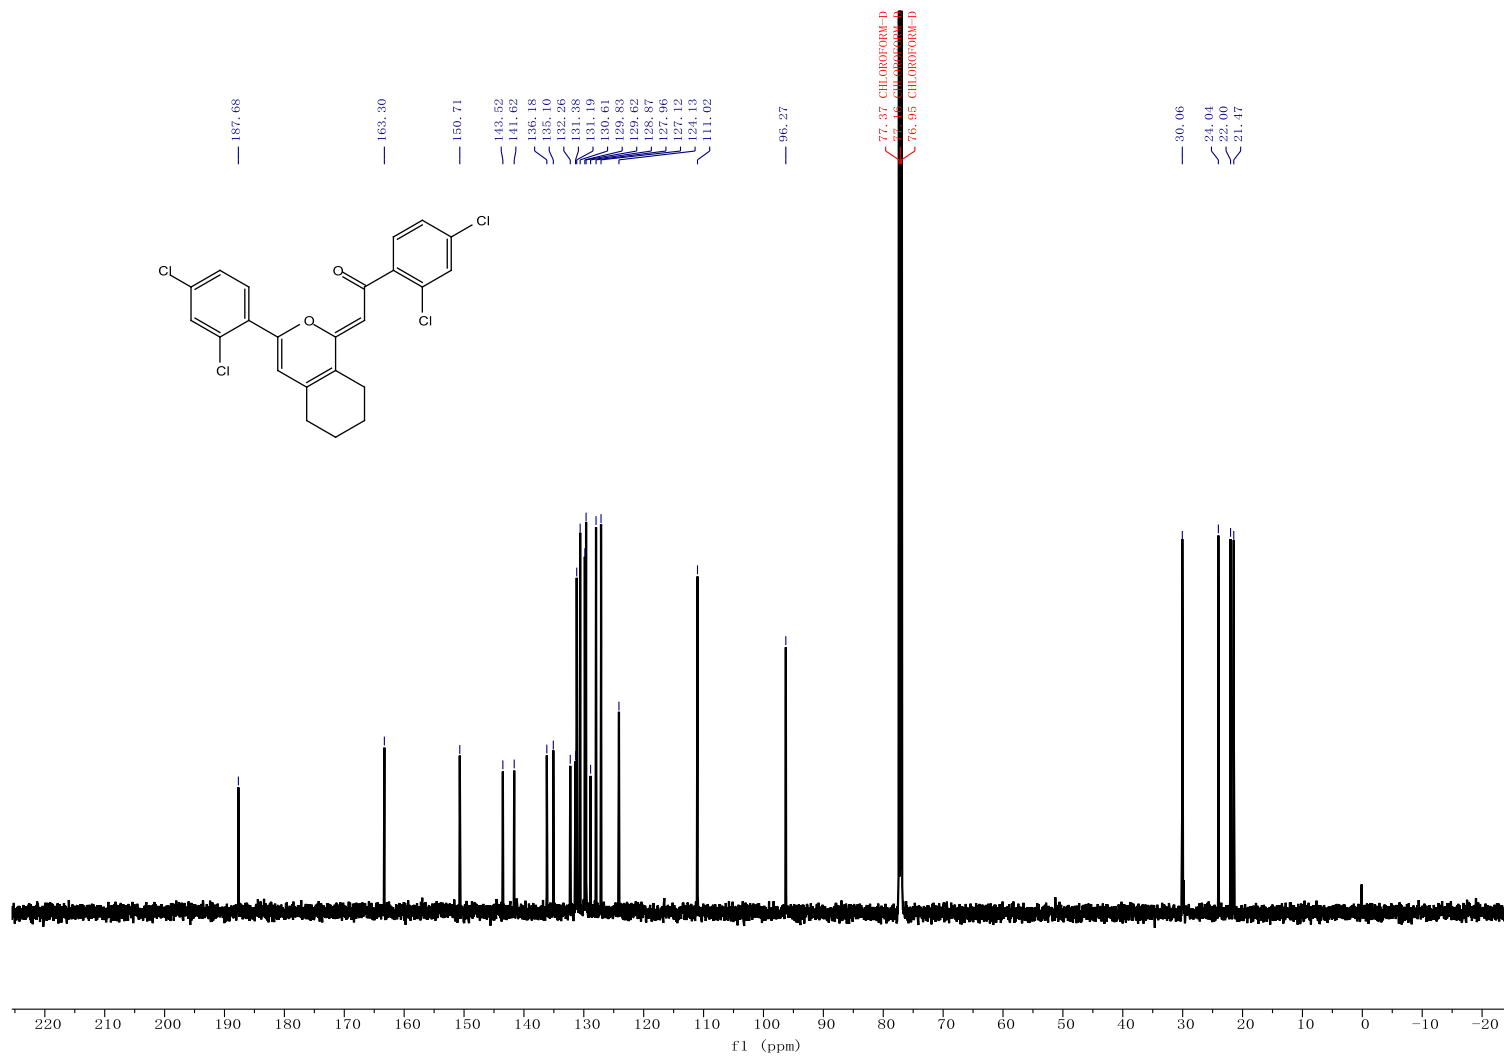

$^1\text{H}$  NMR (600 MHz,  $\text{CDCl}_3$ ) of **4q**

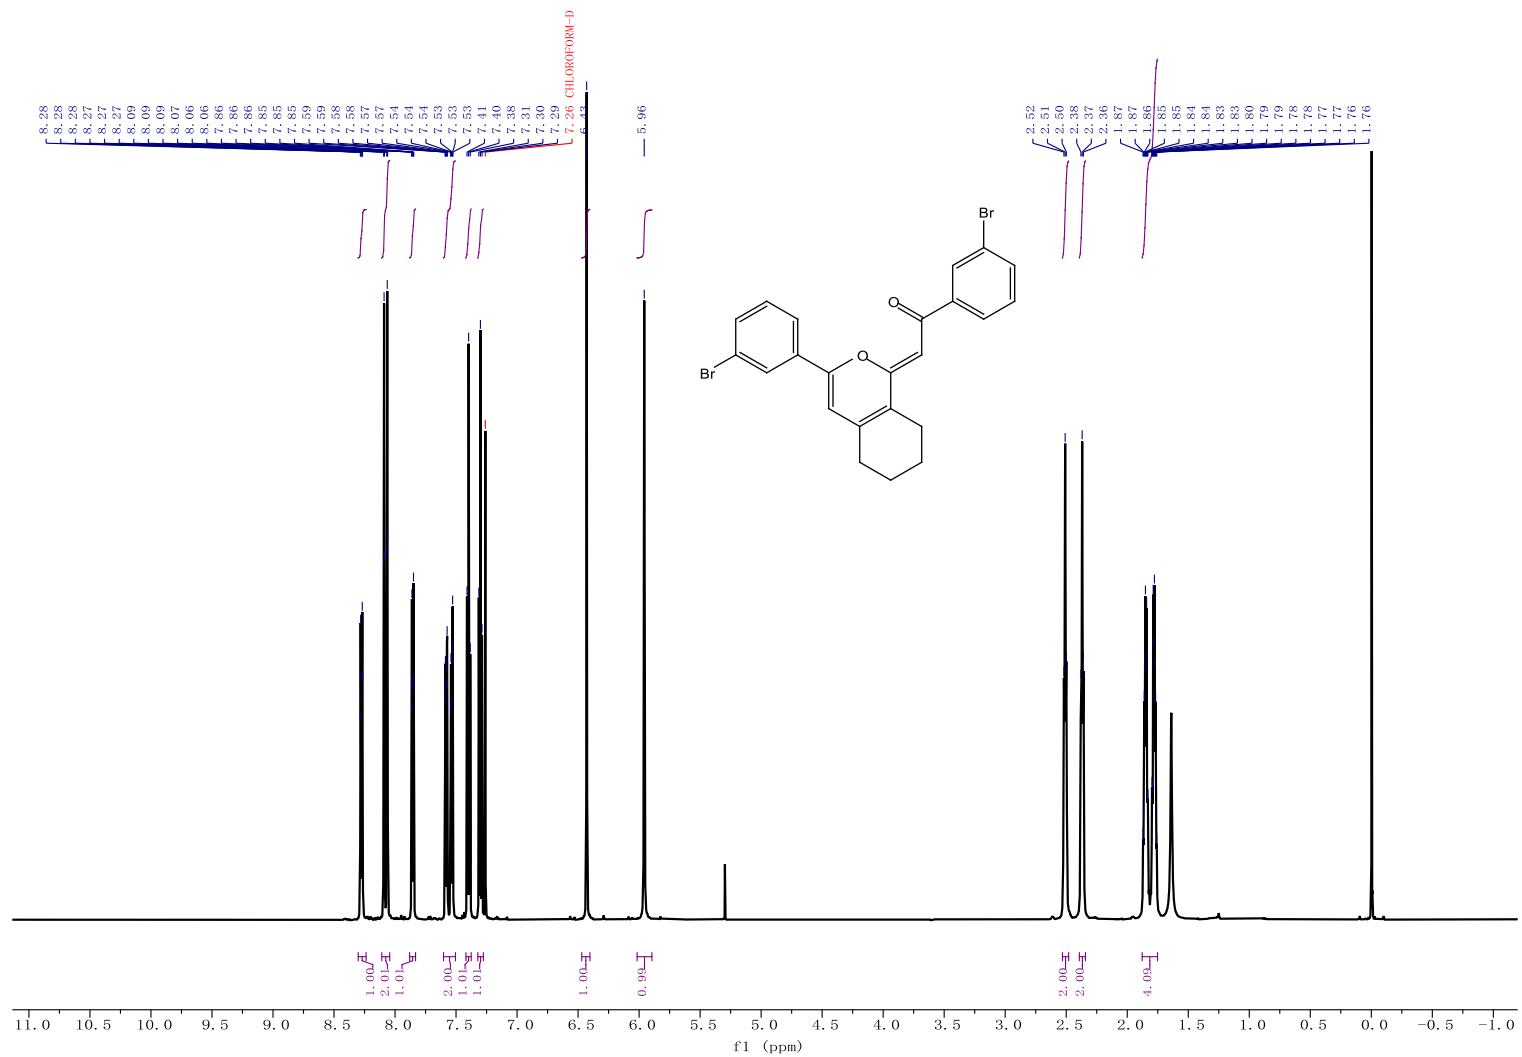

$^{13}\text{C}$  NMR (151 MHz,  $\text{CDCl}_3$ ) of **4q**

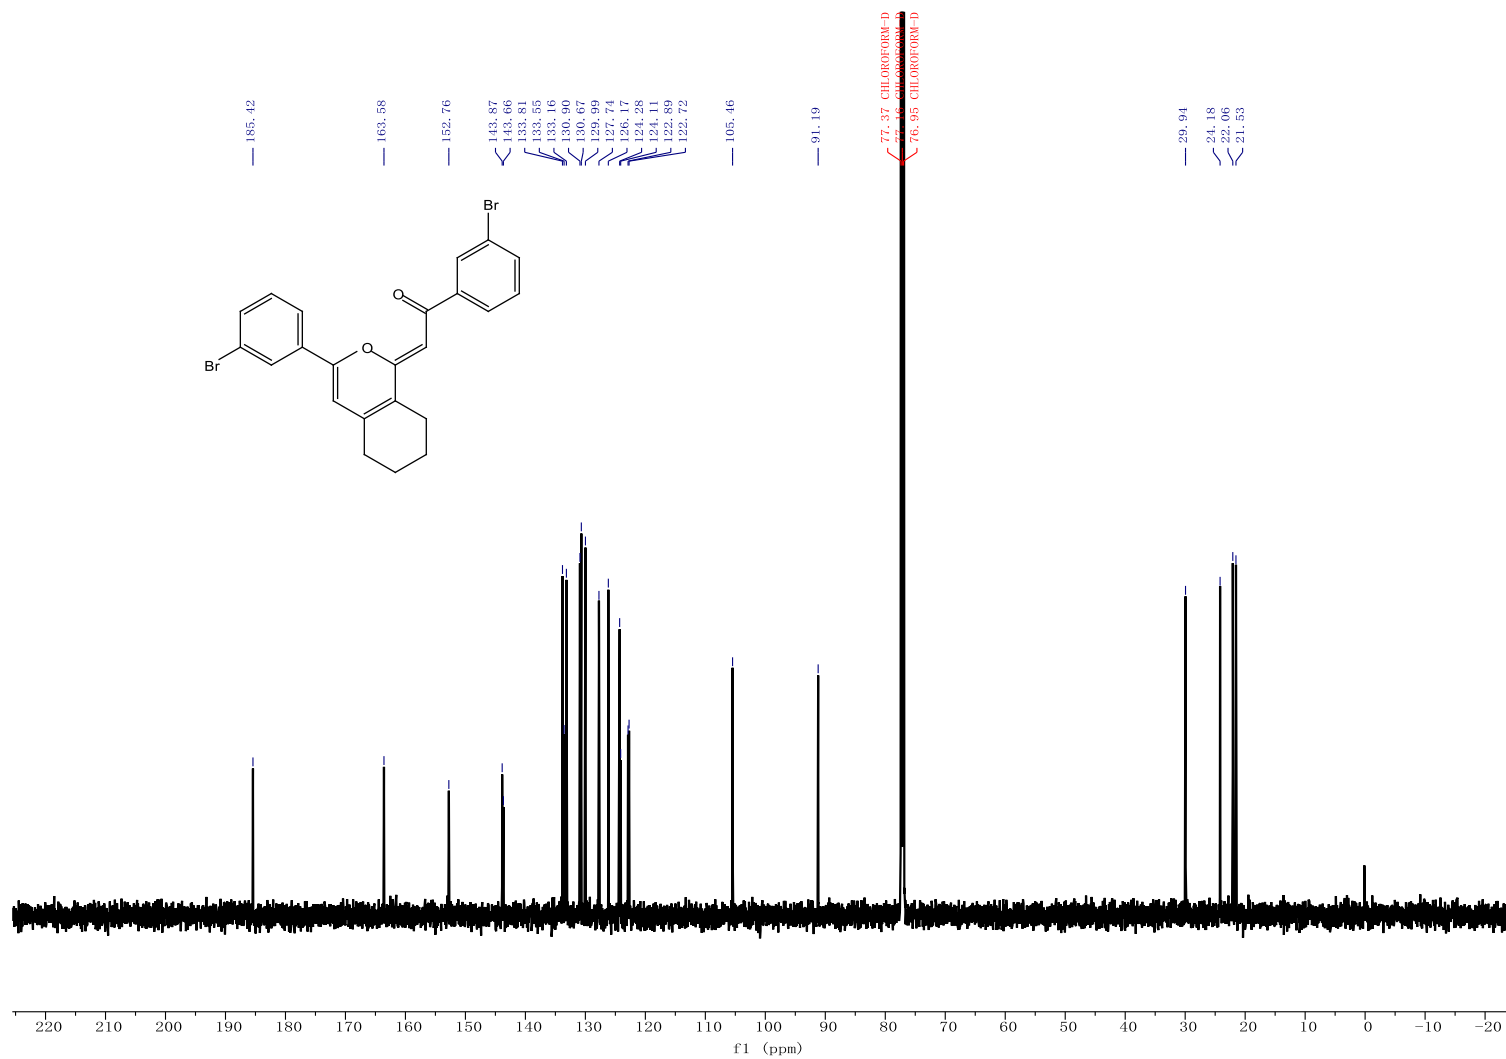

<sup>1</sup>H NMR (600 MHz, CDCl<sub>3</sub>) of **4r**

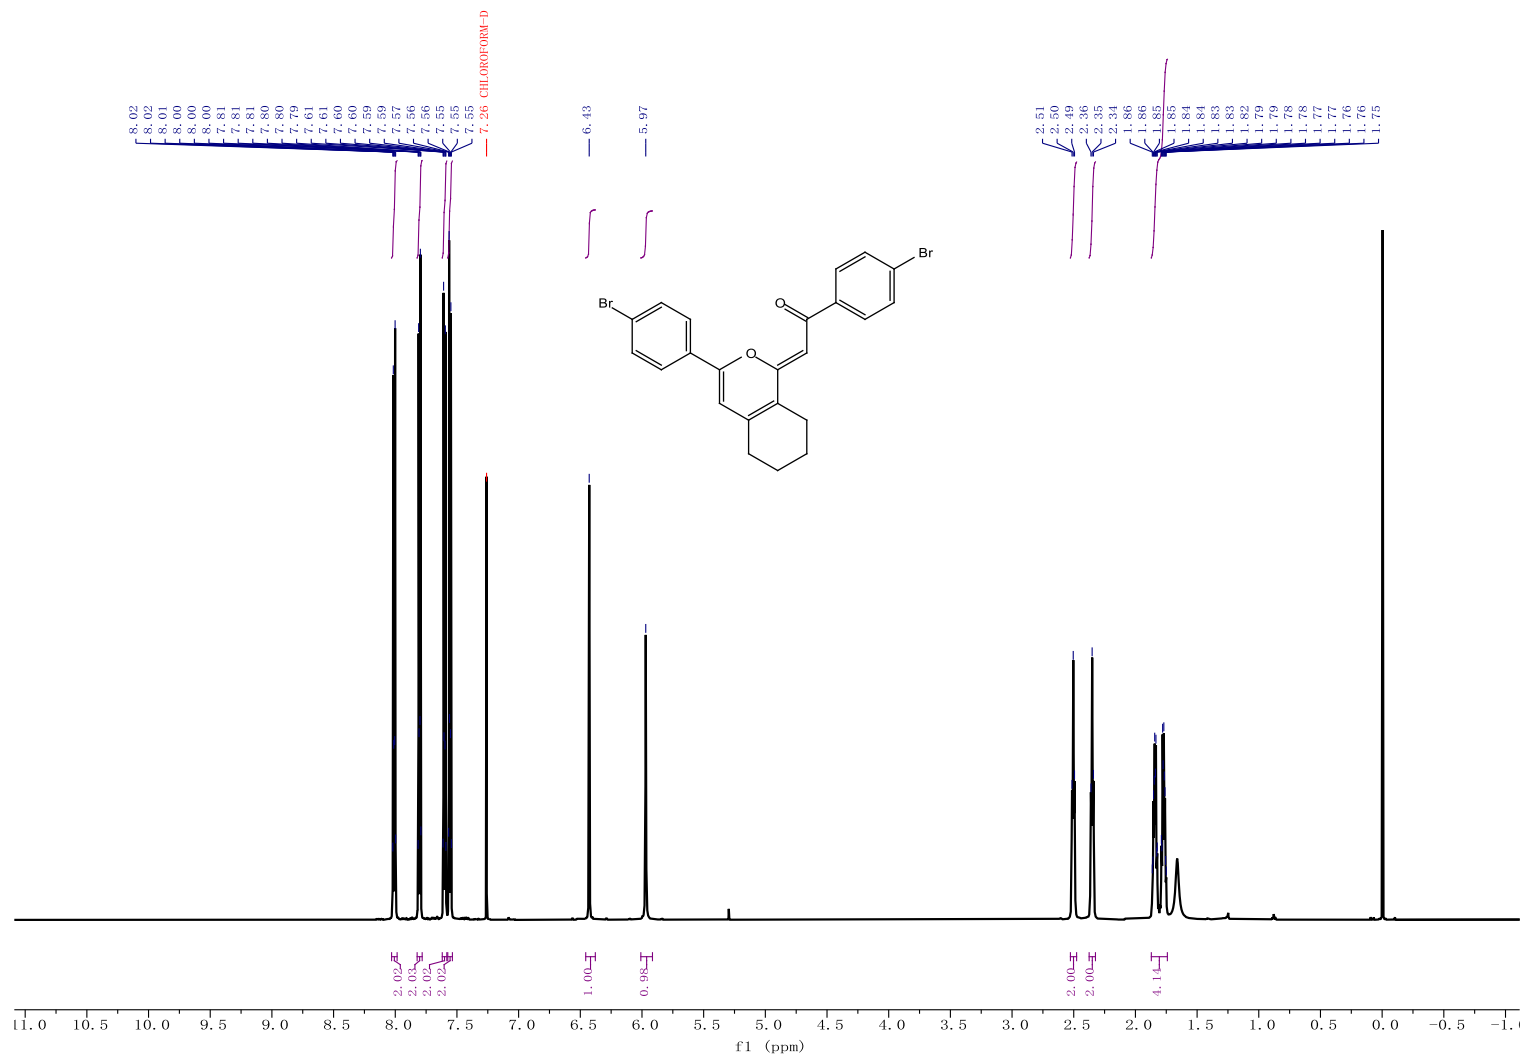

$^{13}\text{C}$  NMR (151 MHz,  $\text{CDCl}_3$ ) of **4r**

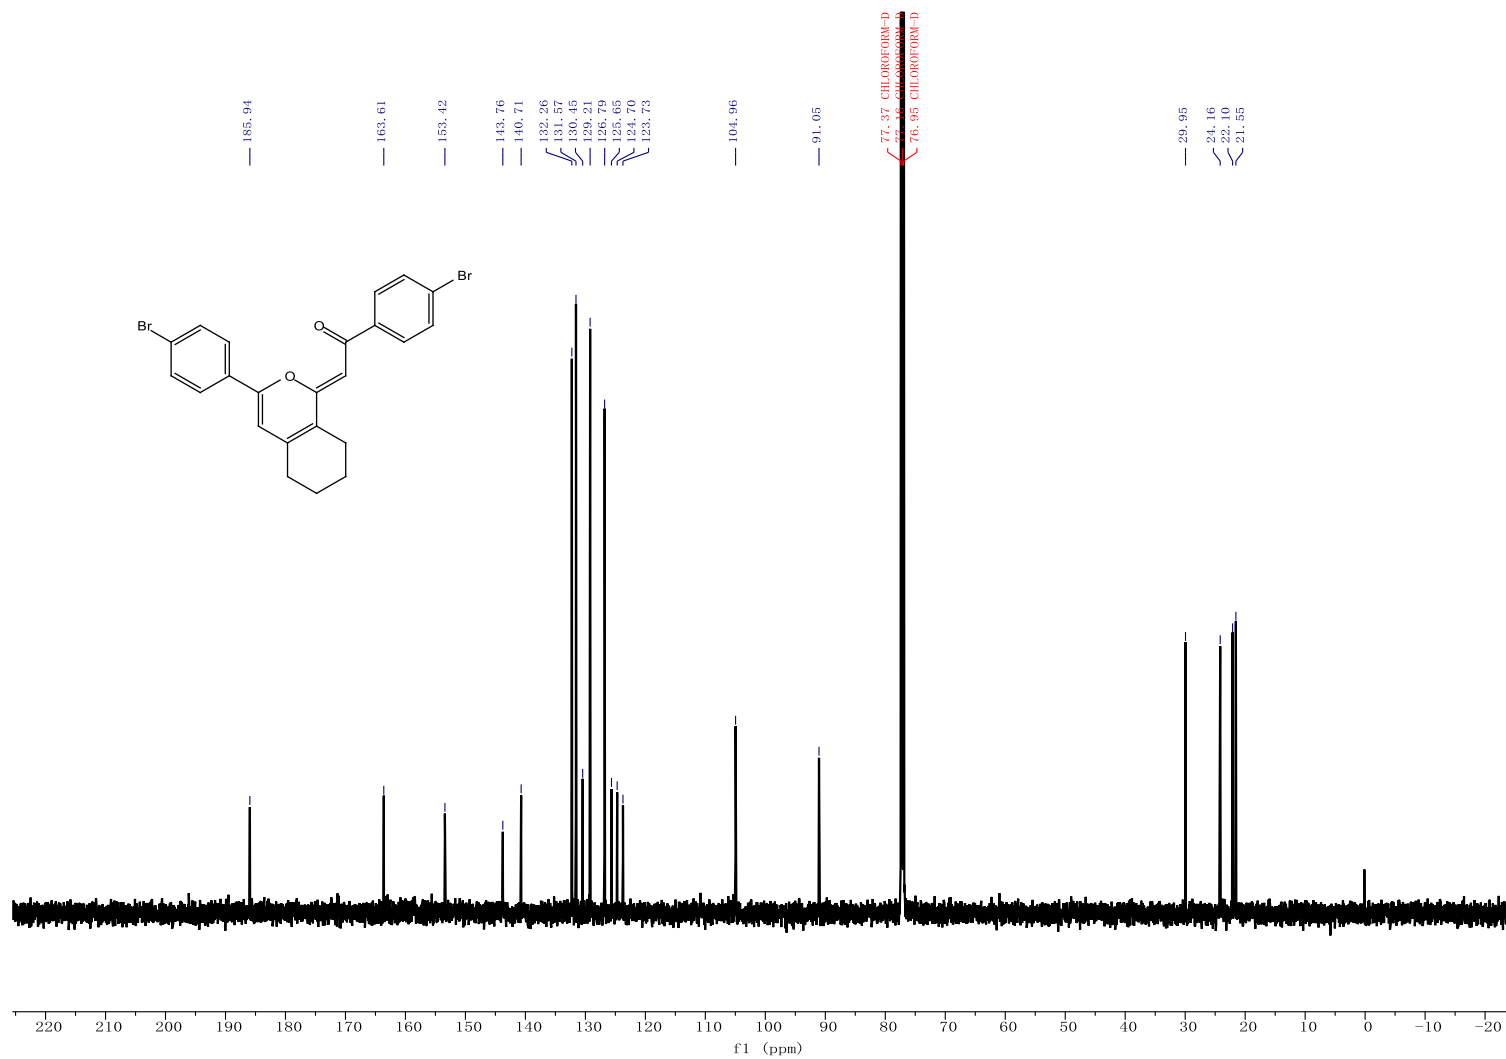

<sup>1</sup>H NMR (600 MHz, CDCl<sub>3</sub>) of **4s**

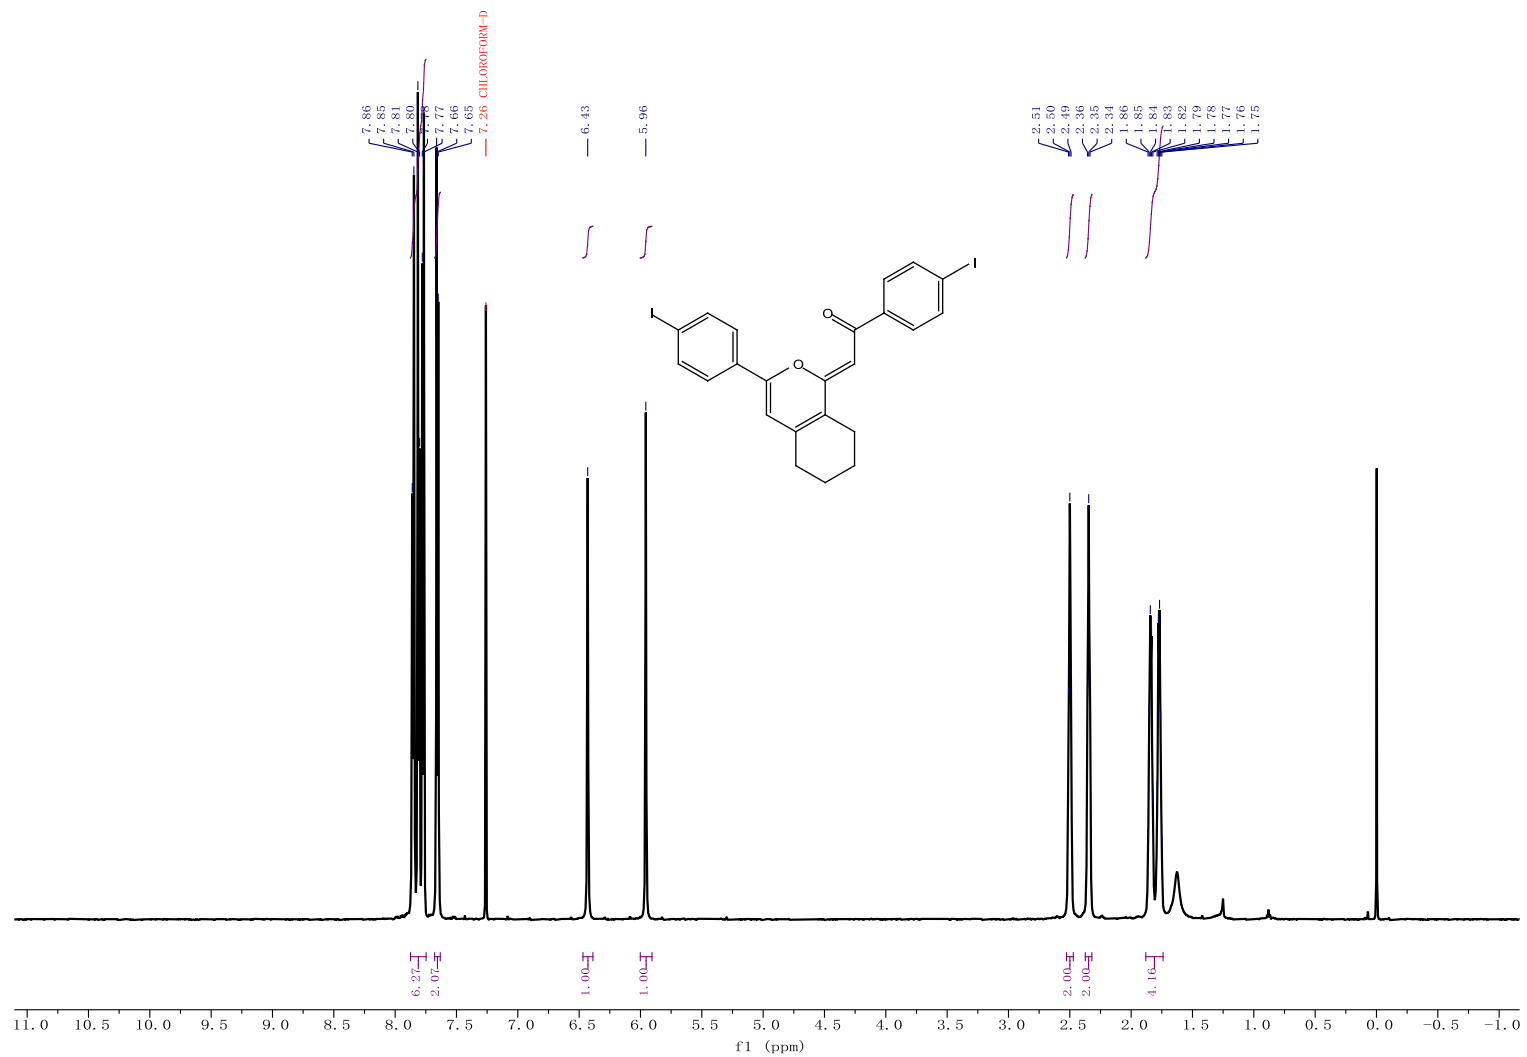

<sup>13</sup>C NMR (151 MHz, CDCl<sub>3</sub>) of 4s

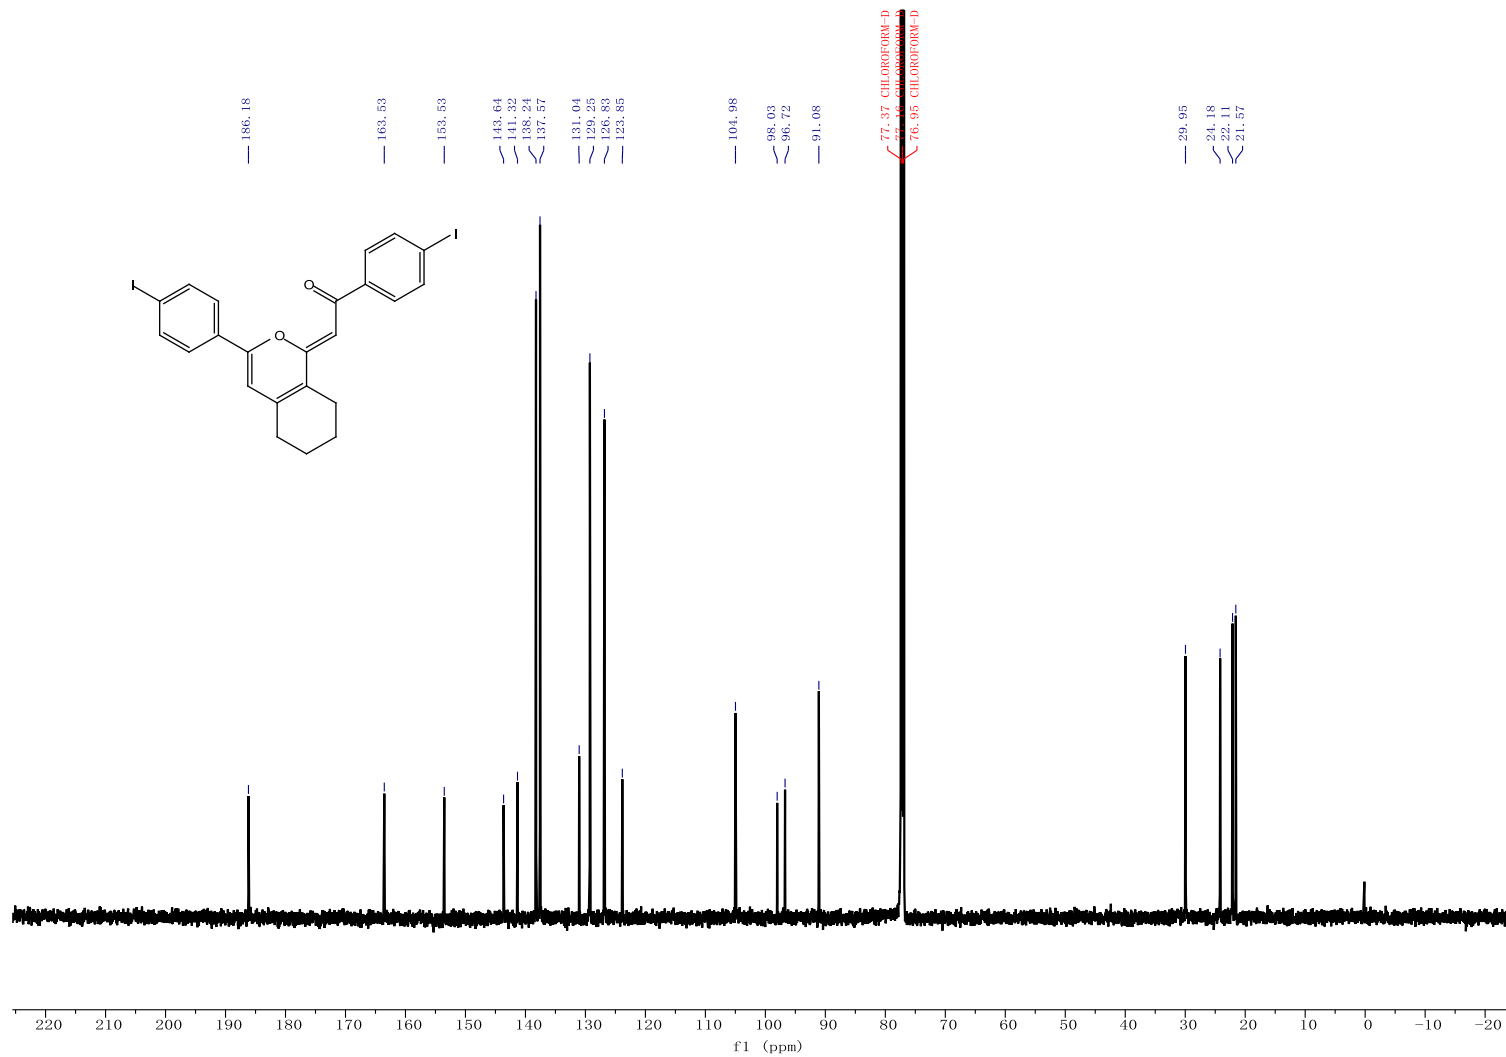

<sup>1</sup>H NMR (600 MHz, CDCl<sub>3</sub>) of 4t

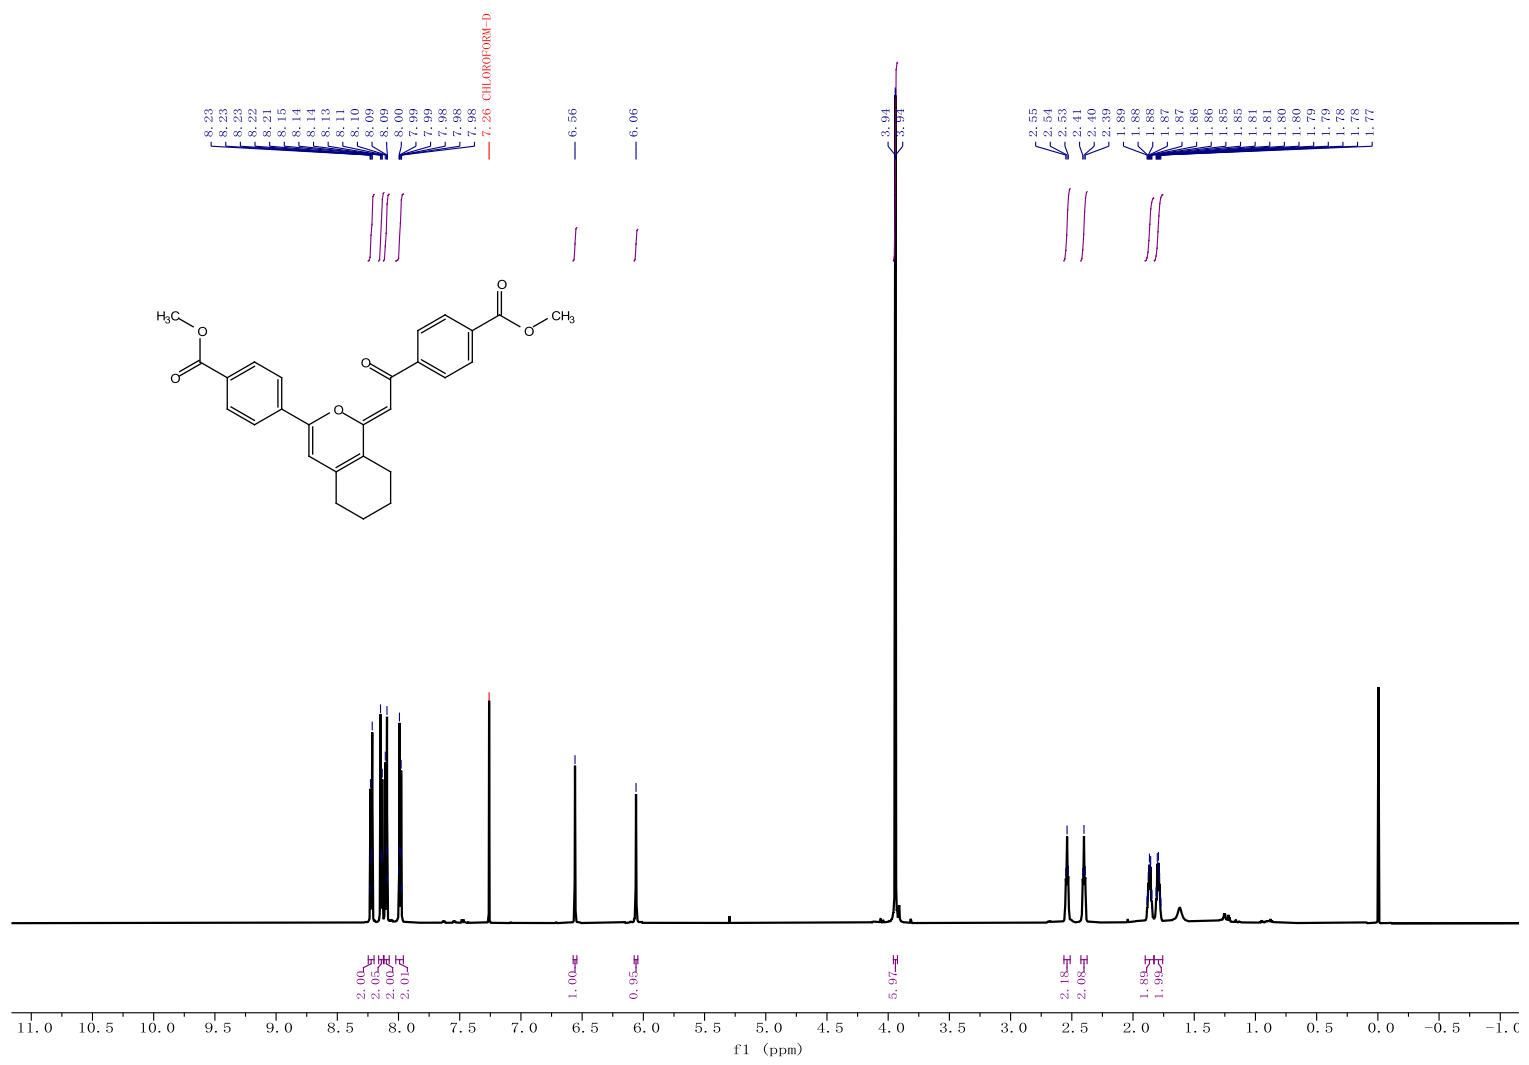



<sup>13</sup>C NMR (151 MHz, CDCl<sub>3</sub>) of 4t

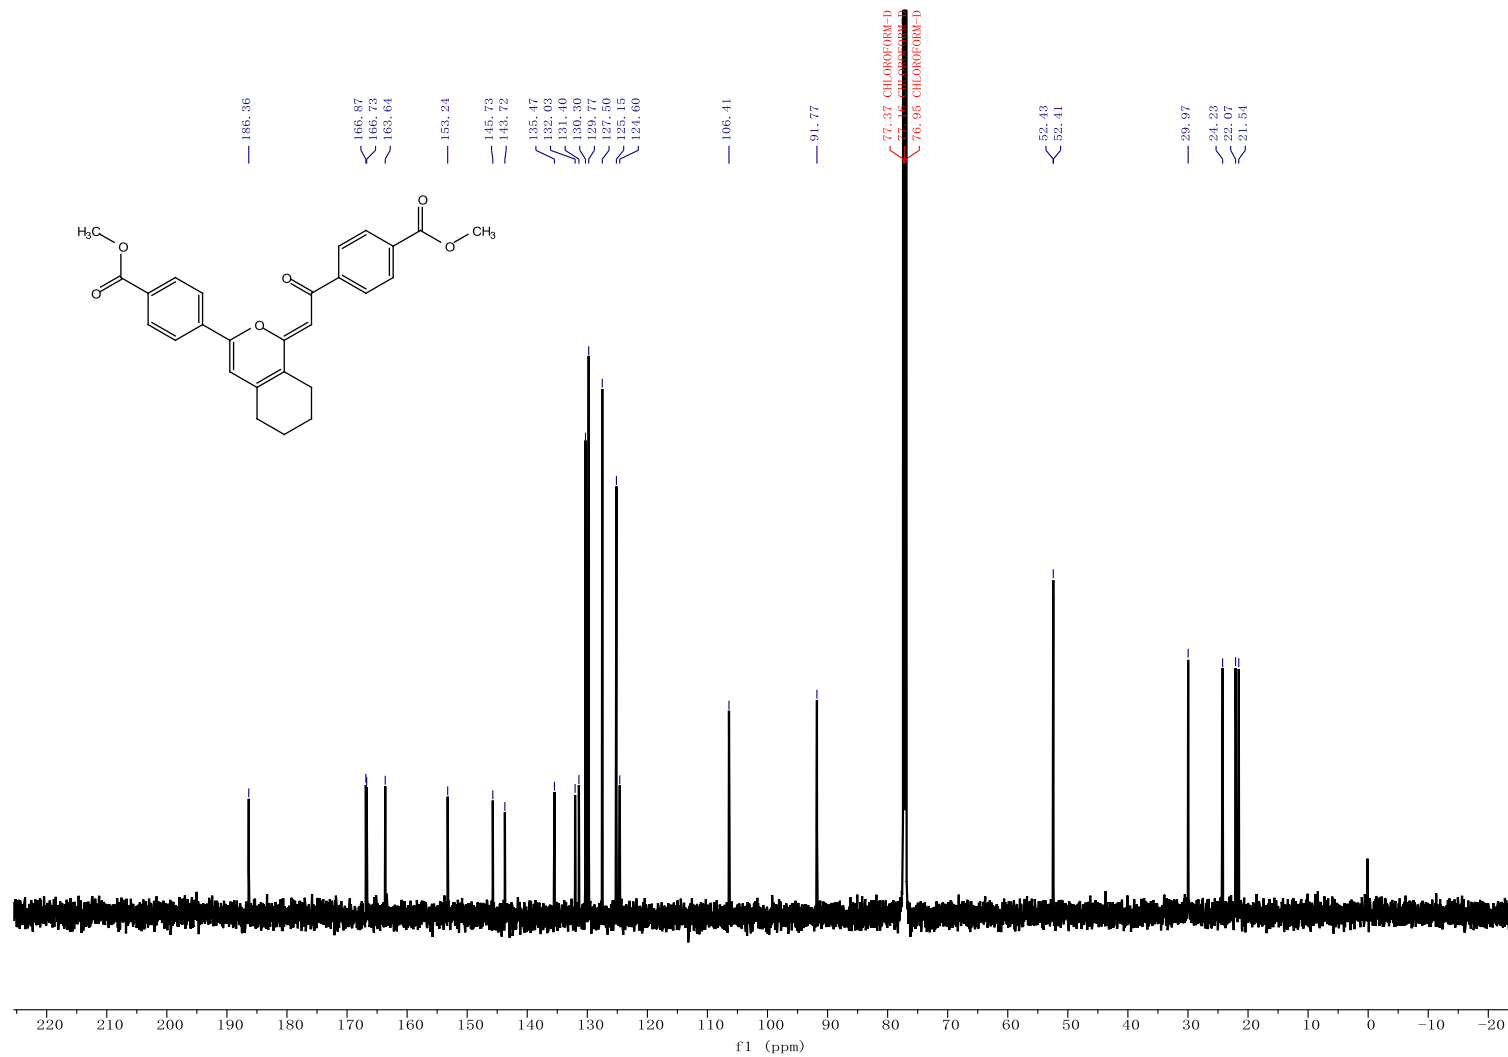

<sup>1</sup>H NMR (600 MHz, CDCl<sub>3</sub>) of **4u**

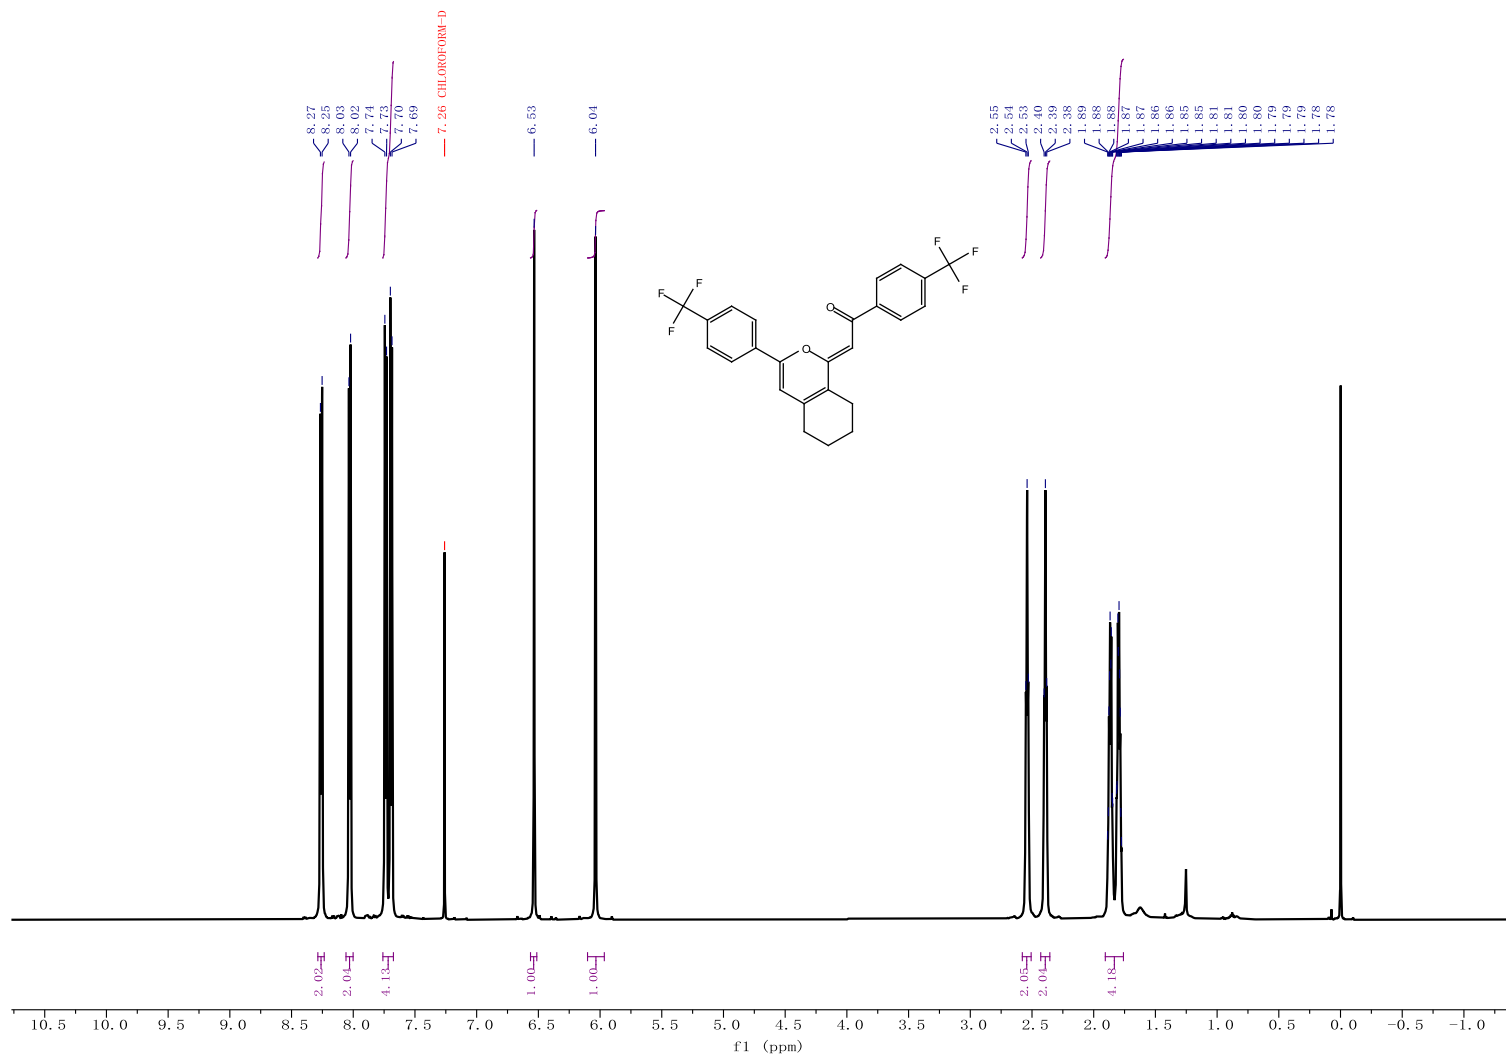

<sup>13</sup>C NMR (151 MHz, CDCl<sub>3</sub>) of **4u**

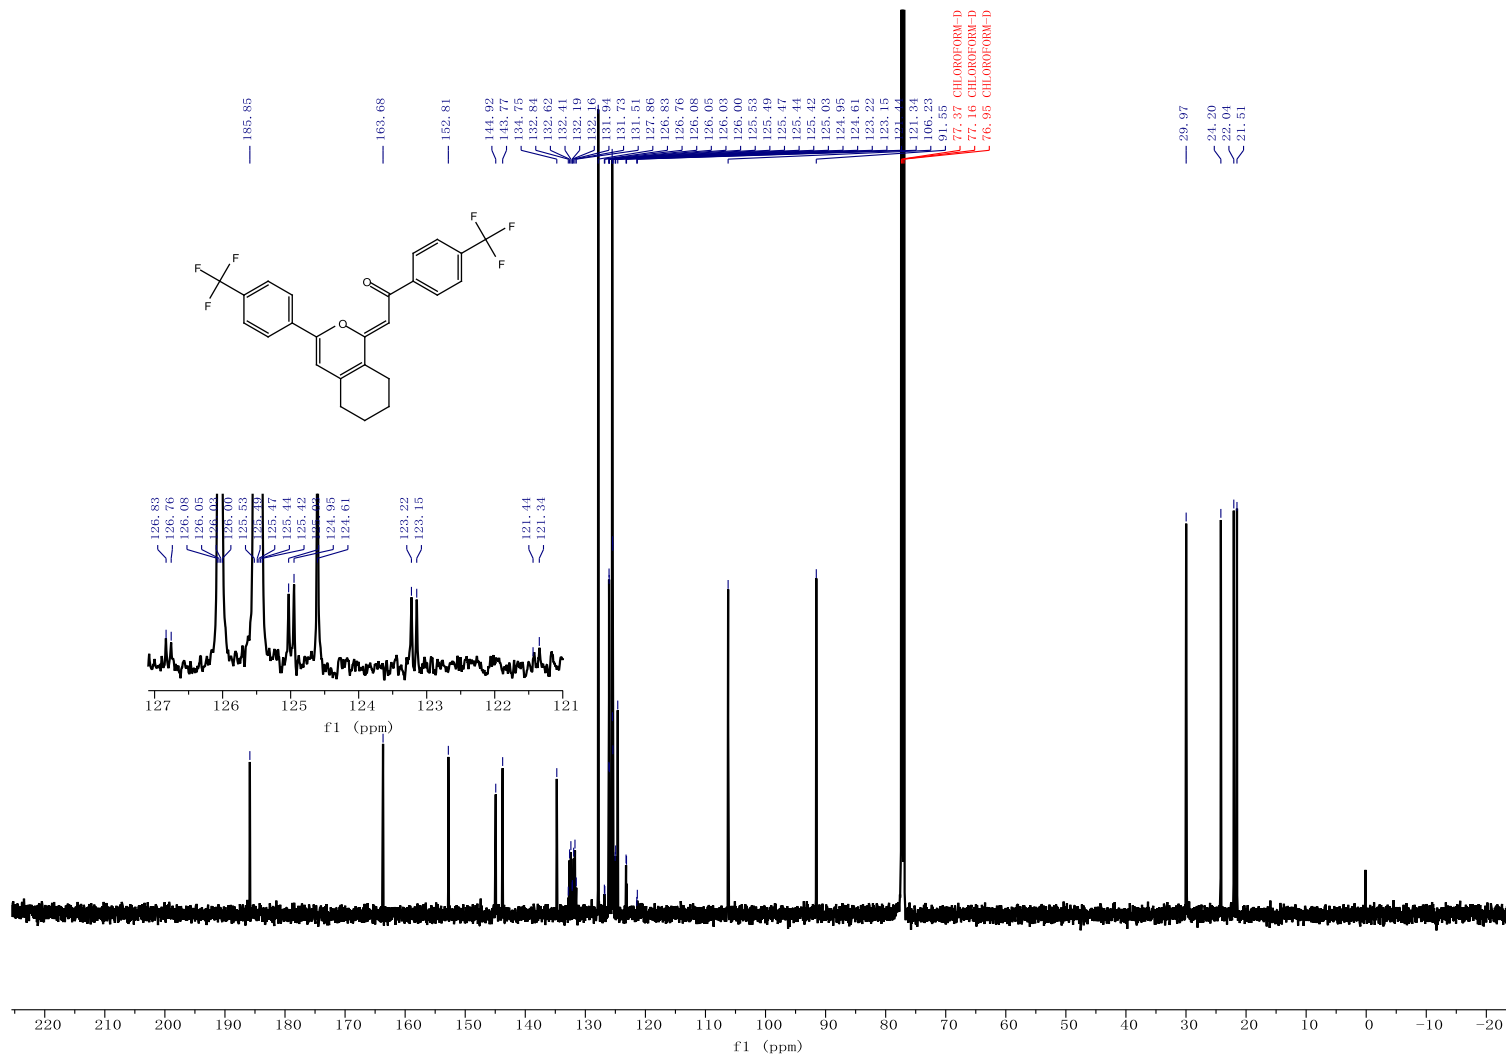

$^{19}\text{F}$  NMR (565 MHz,  $\text{CDCl}_3$ ) of **4u**

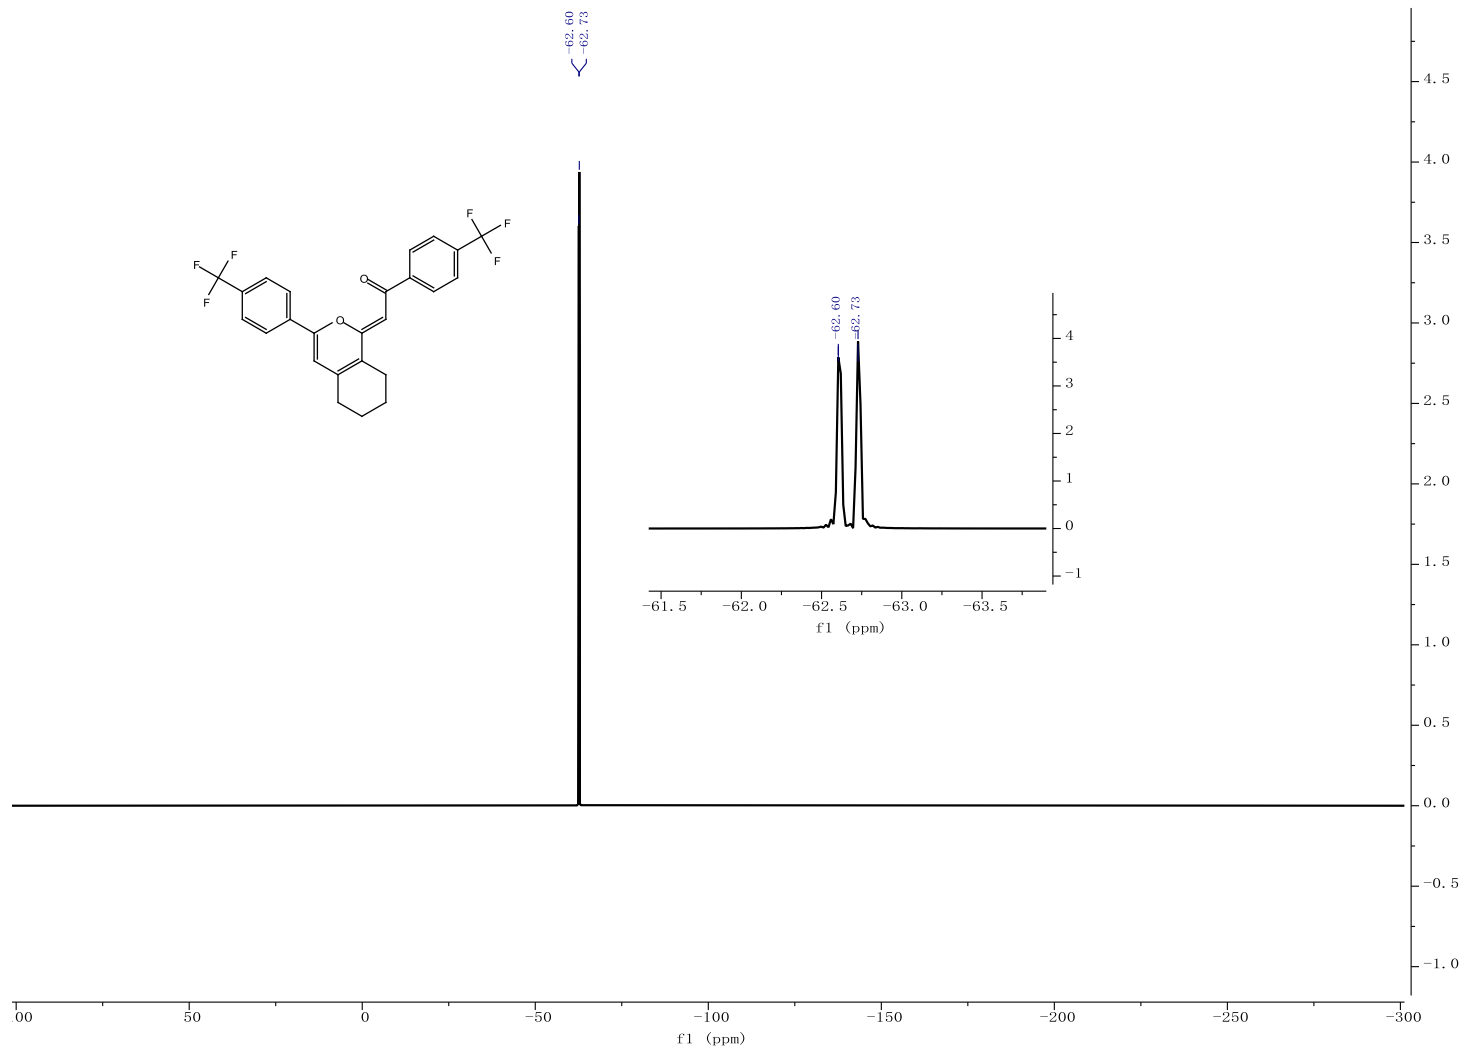

<sup>1</sup>H NMR (600 MHz, CDCl<sub>3</sub>) of **4v**

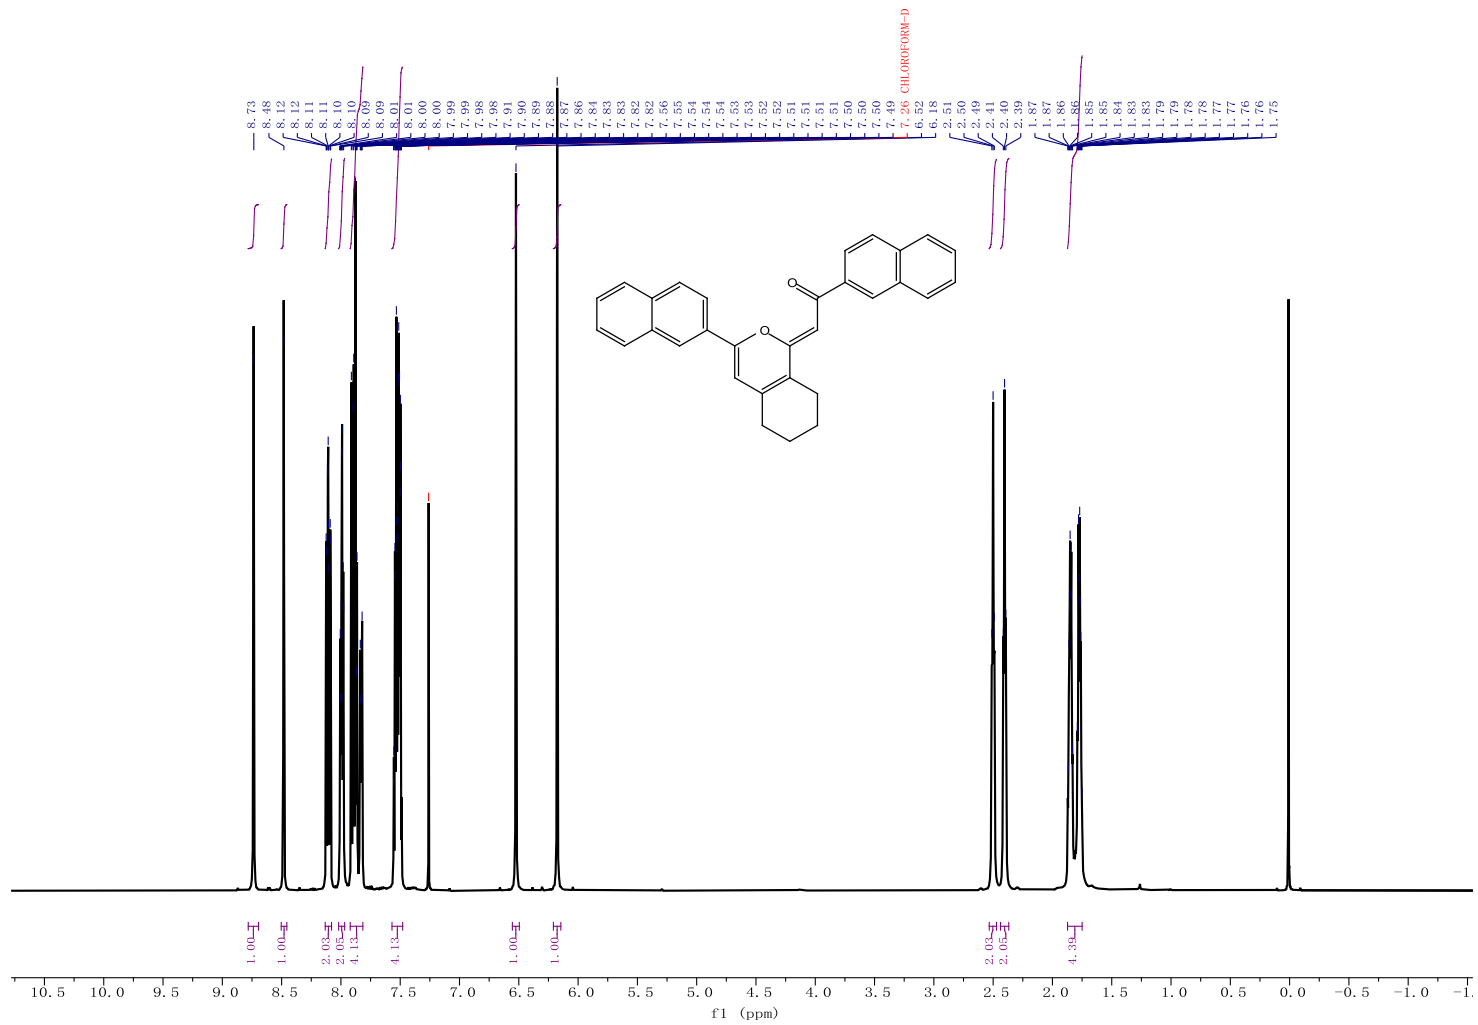

<sup>13</sup>C NMR (151 MHz, CDCl<sub>3</sub>) of **4v**

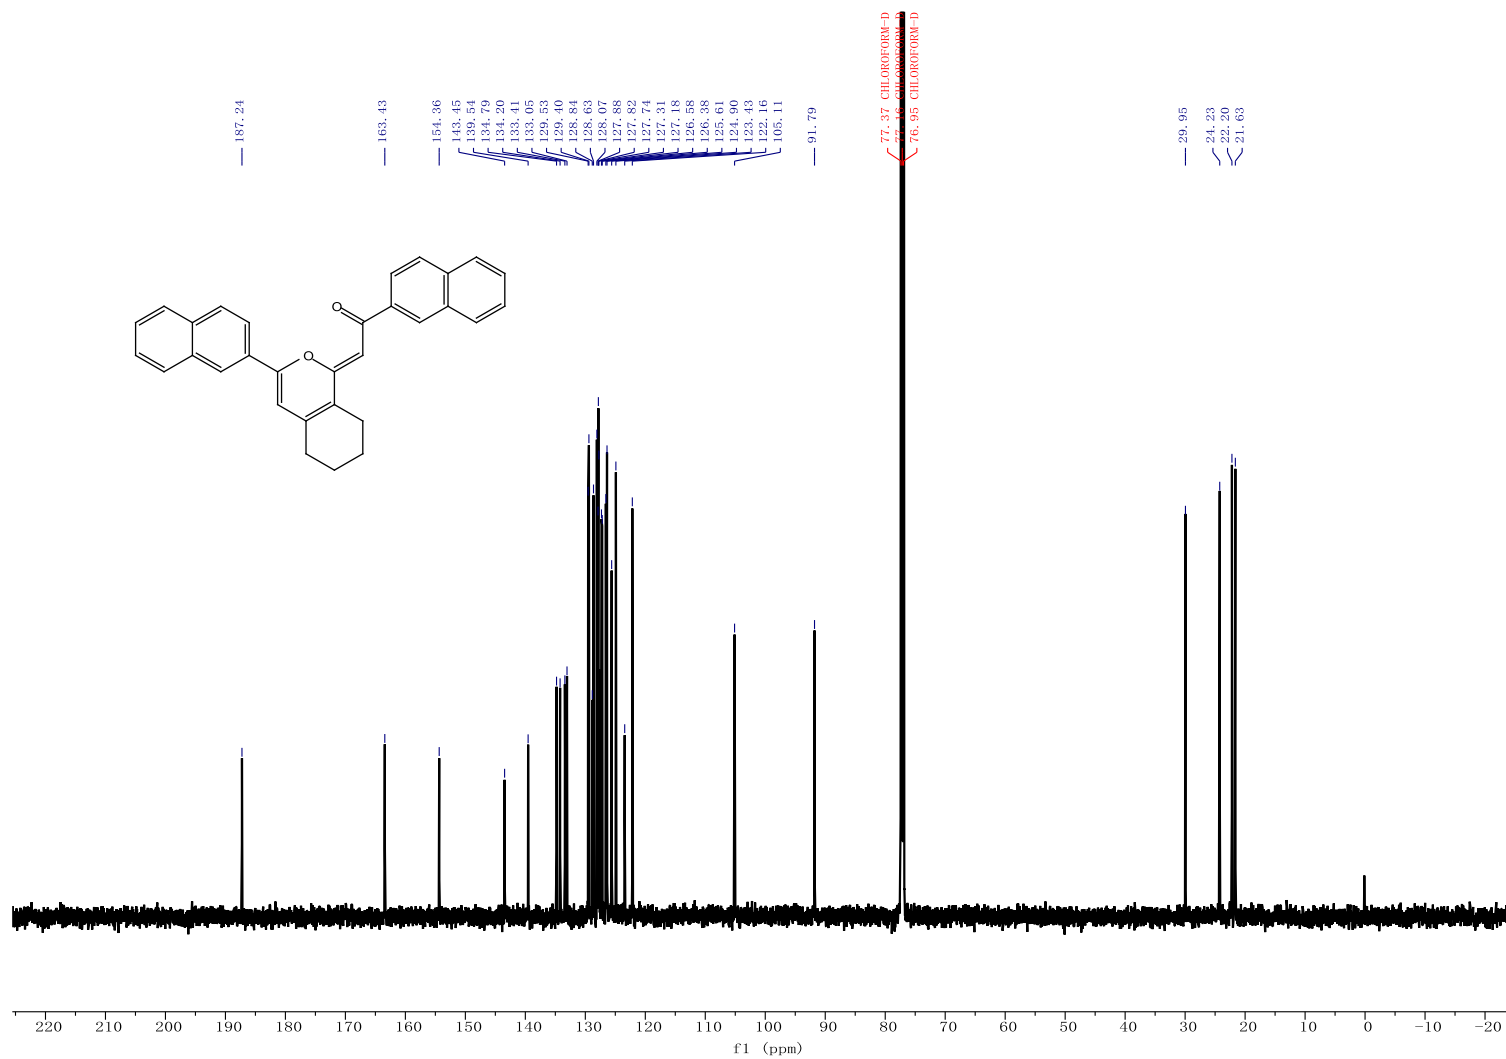

<sup>1</sup>H NMR (600 MHz, CDCl<sub>3</sub>) of **4w**

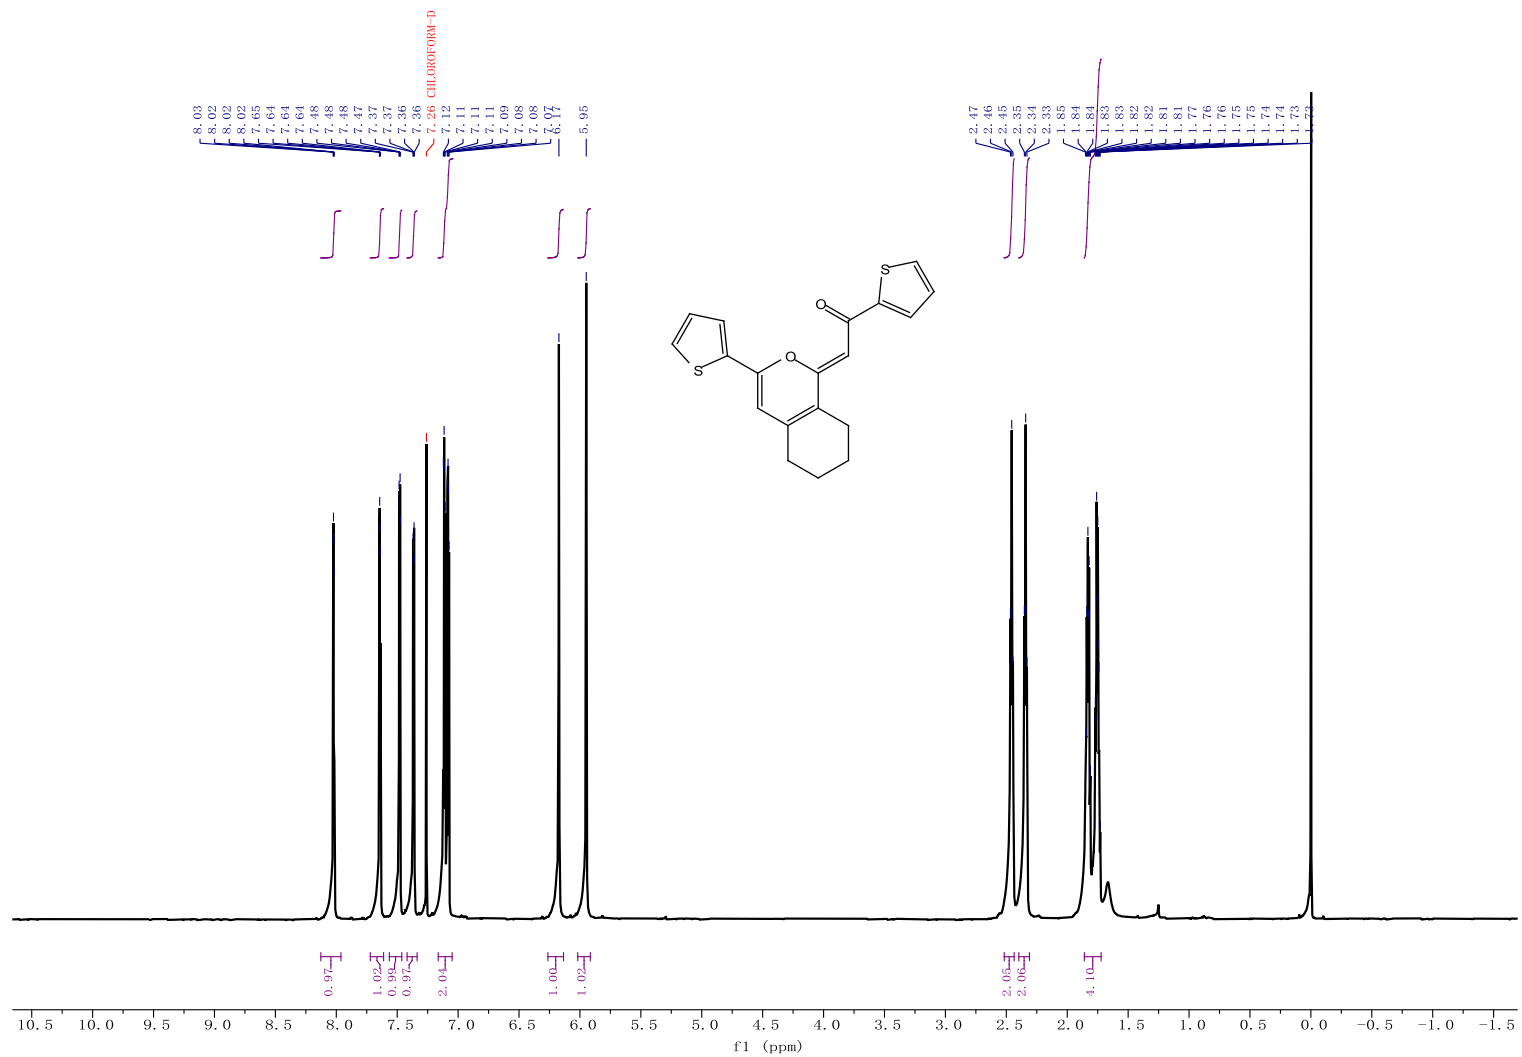

$^{13}\text{C}$  NMR (151 MHz,  $\text{CDCl}_3$ ) of **4w**

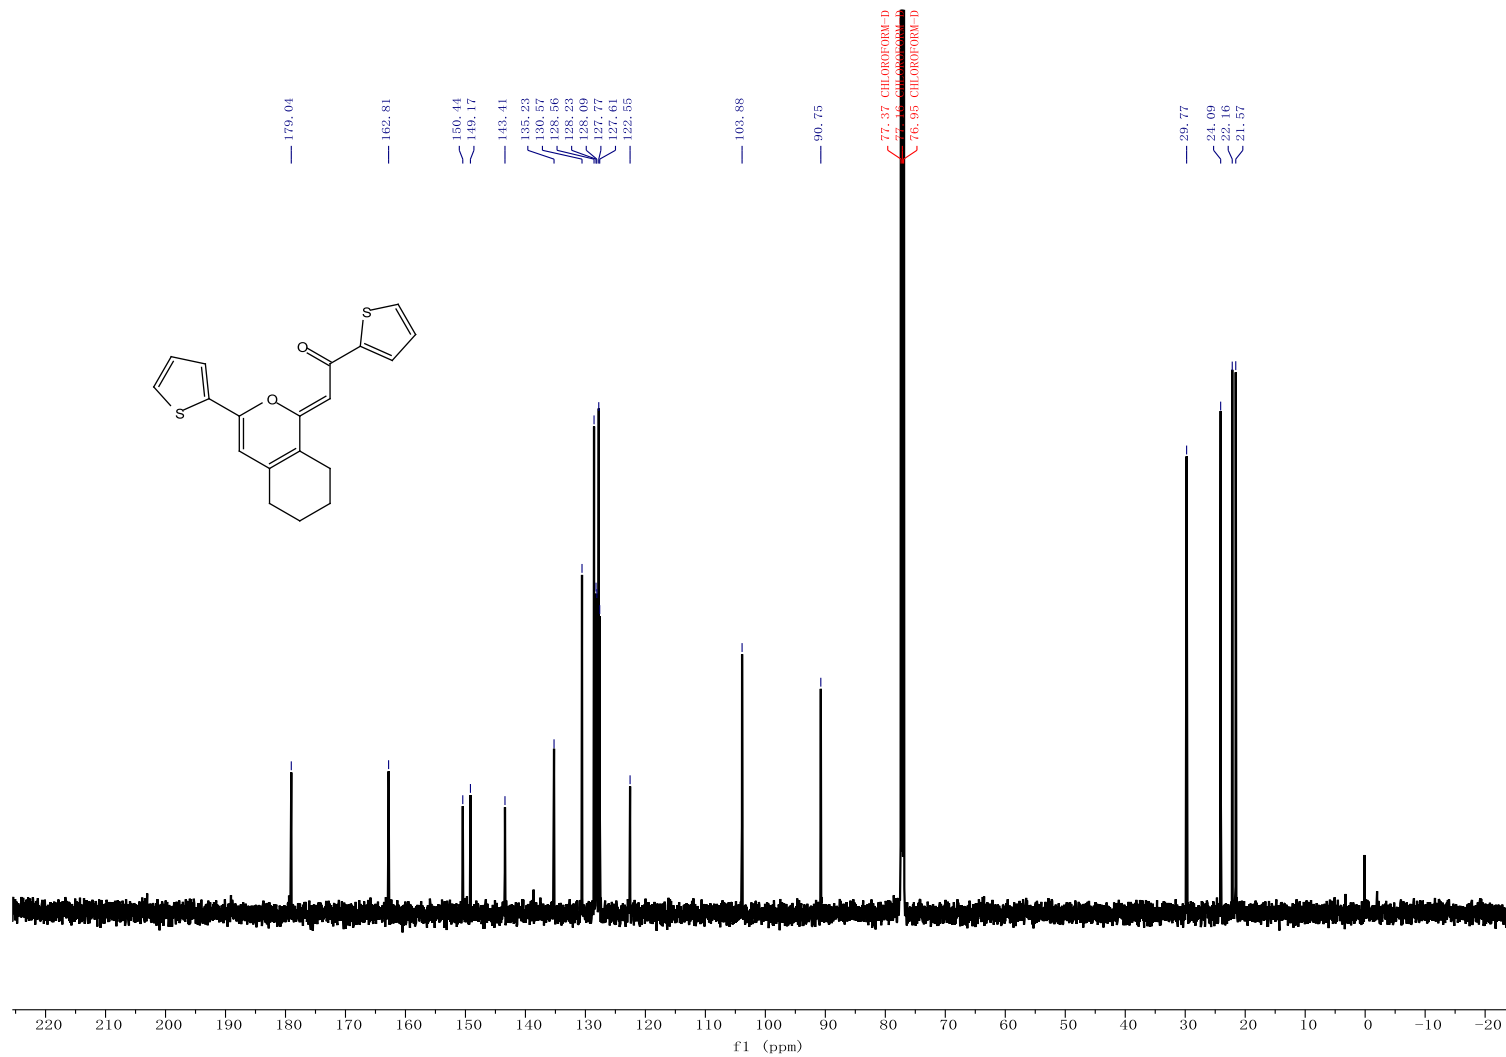



<sup>1</sup>H NMR (600 MHz, CDCl<sub>3</sub>) of **4x**

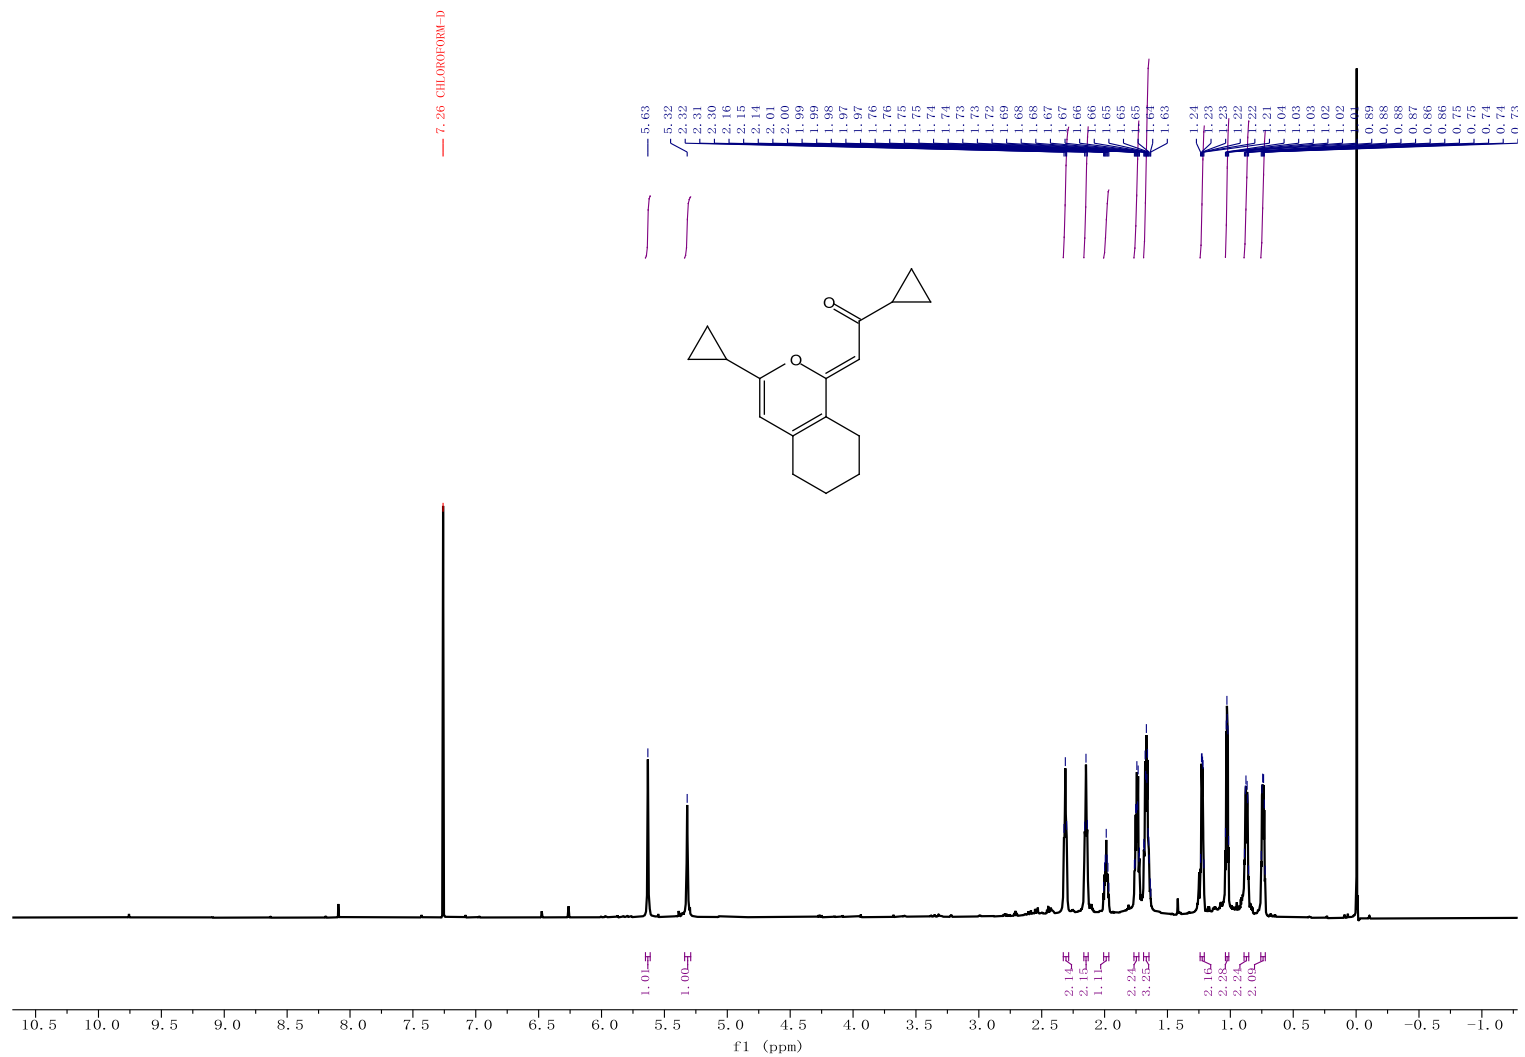

$^{13}\text{C}$  NMR (151 MHz,  $\text{CDCl}_3$ ) of **4x**

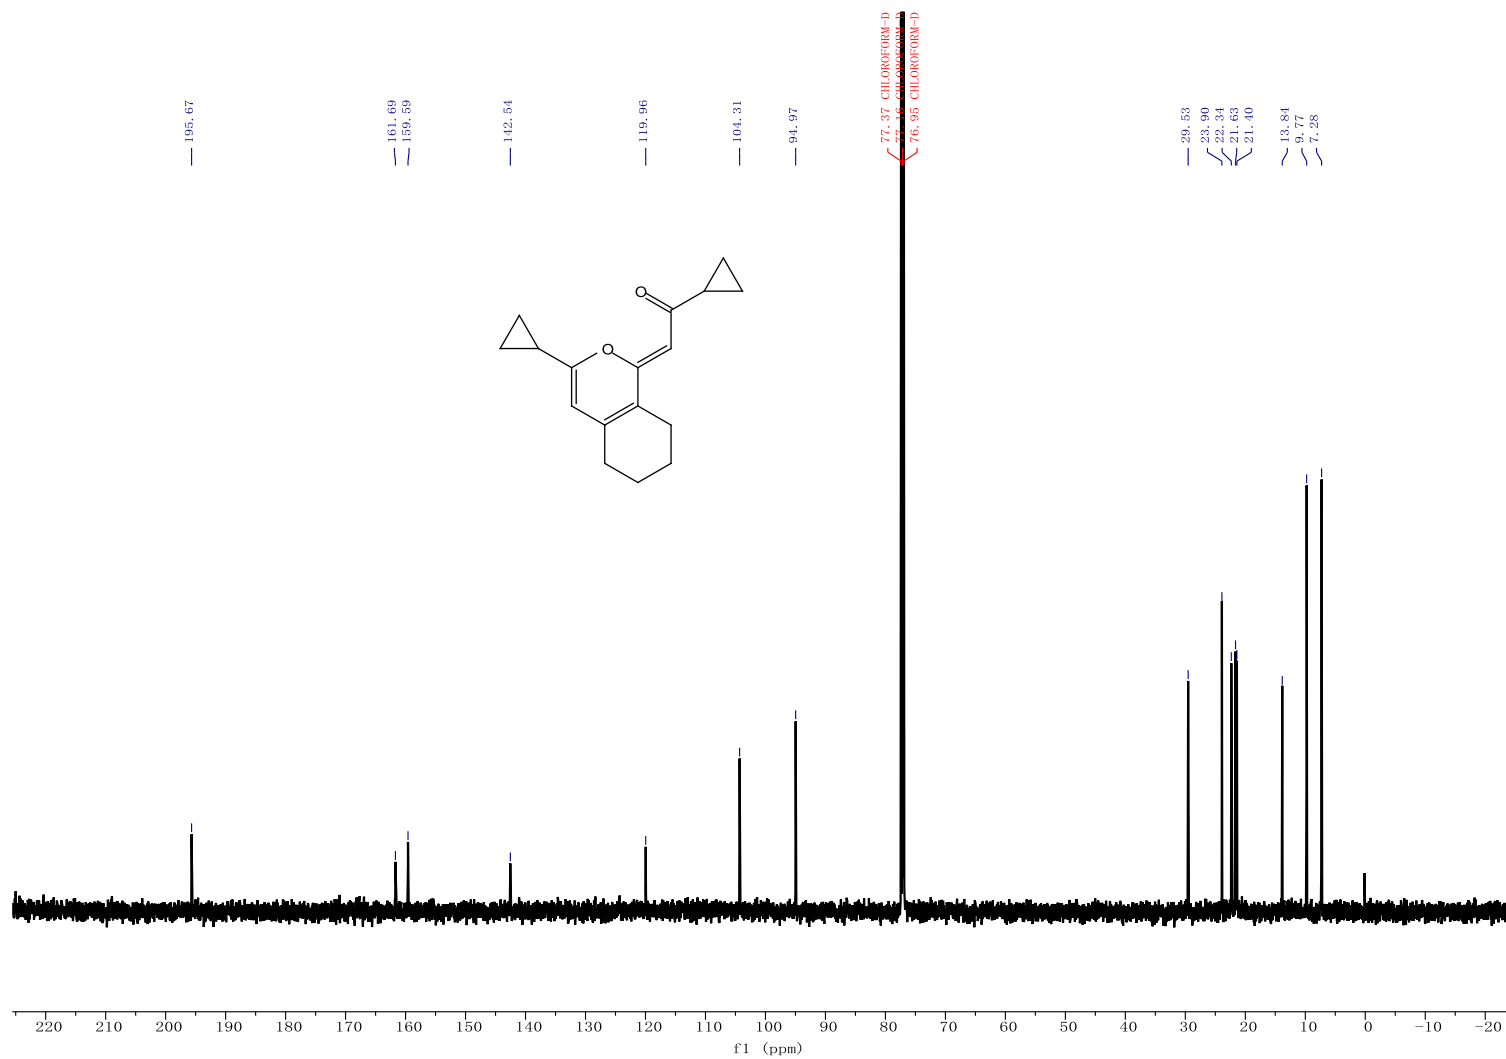

<sup>1</sup>H NMR (600 MHz, CDCl<sub>3</sub>) of **6a**

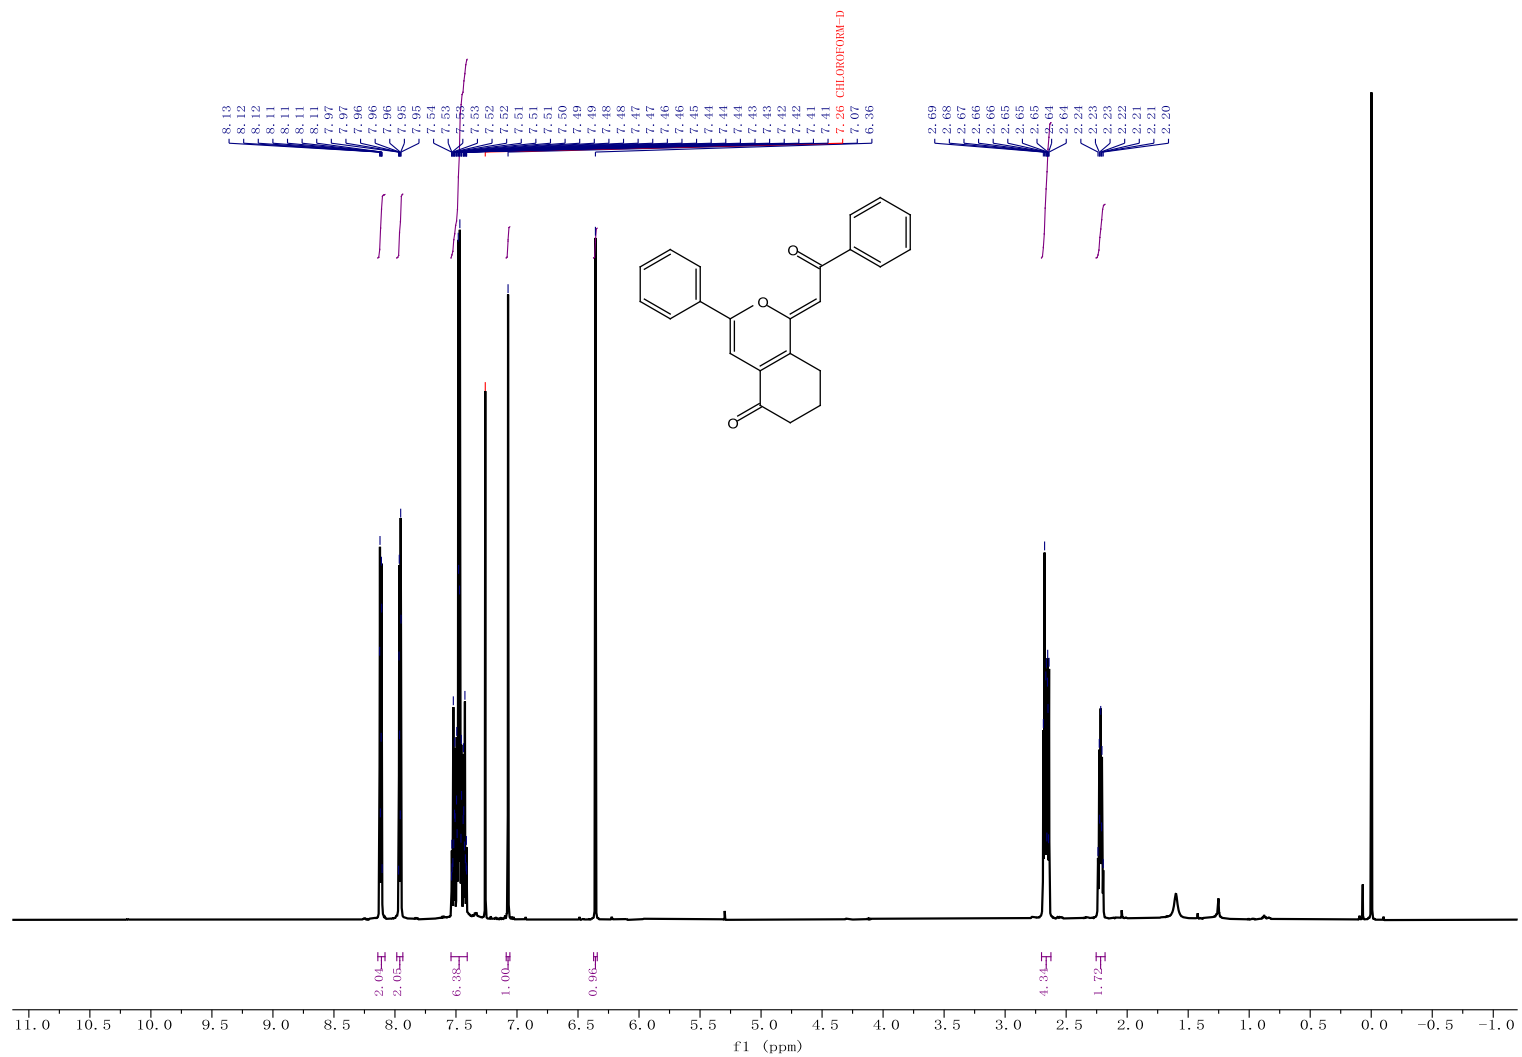

<sup>13</sup>C NMR (151 MHz, CDCl<sub>3</sub>) of **6a**

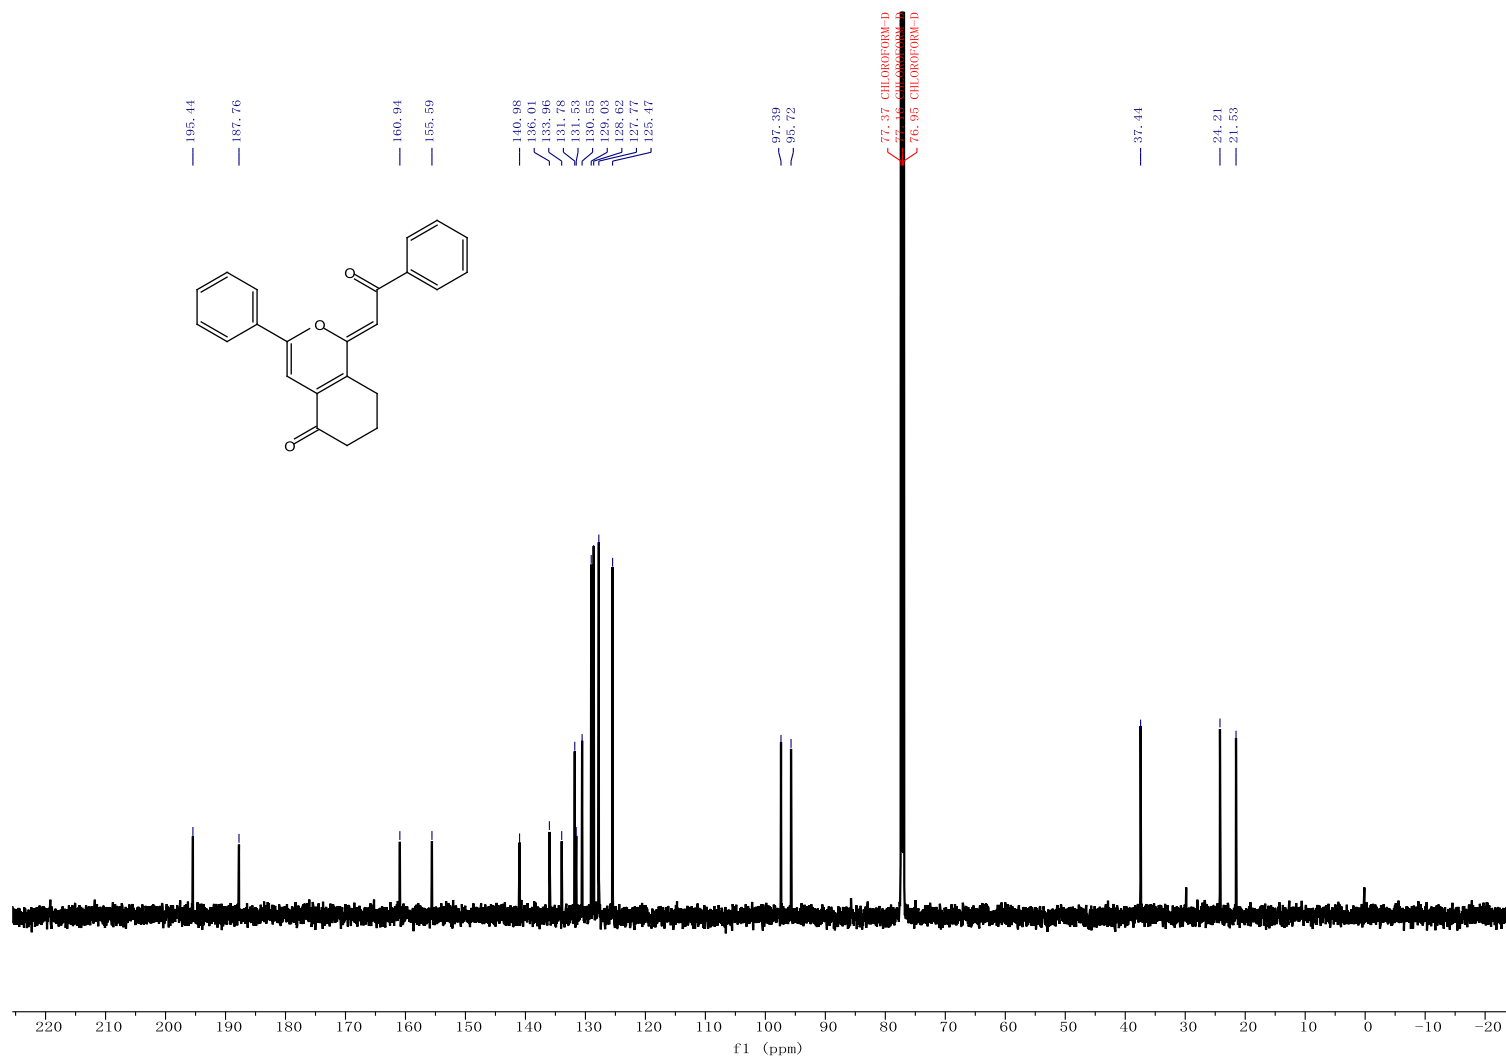

<sup>1</sup>H NMR (600 MHz, CDCl<sub>3</sub>) of **6b**

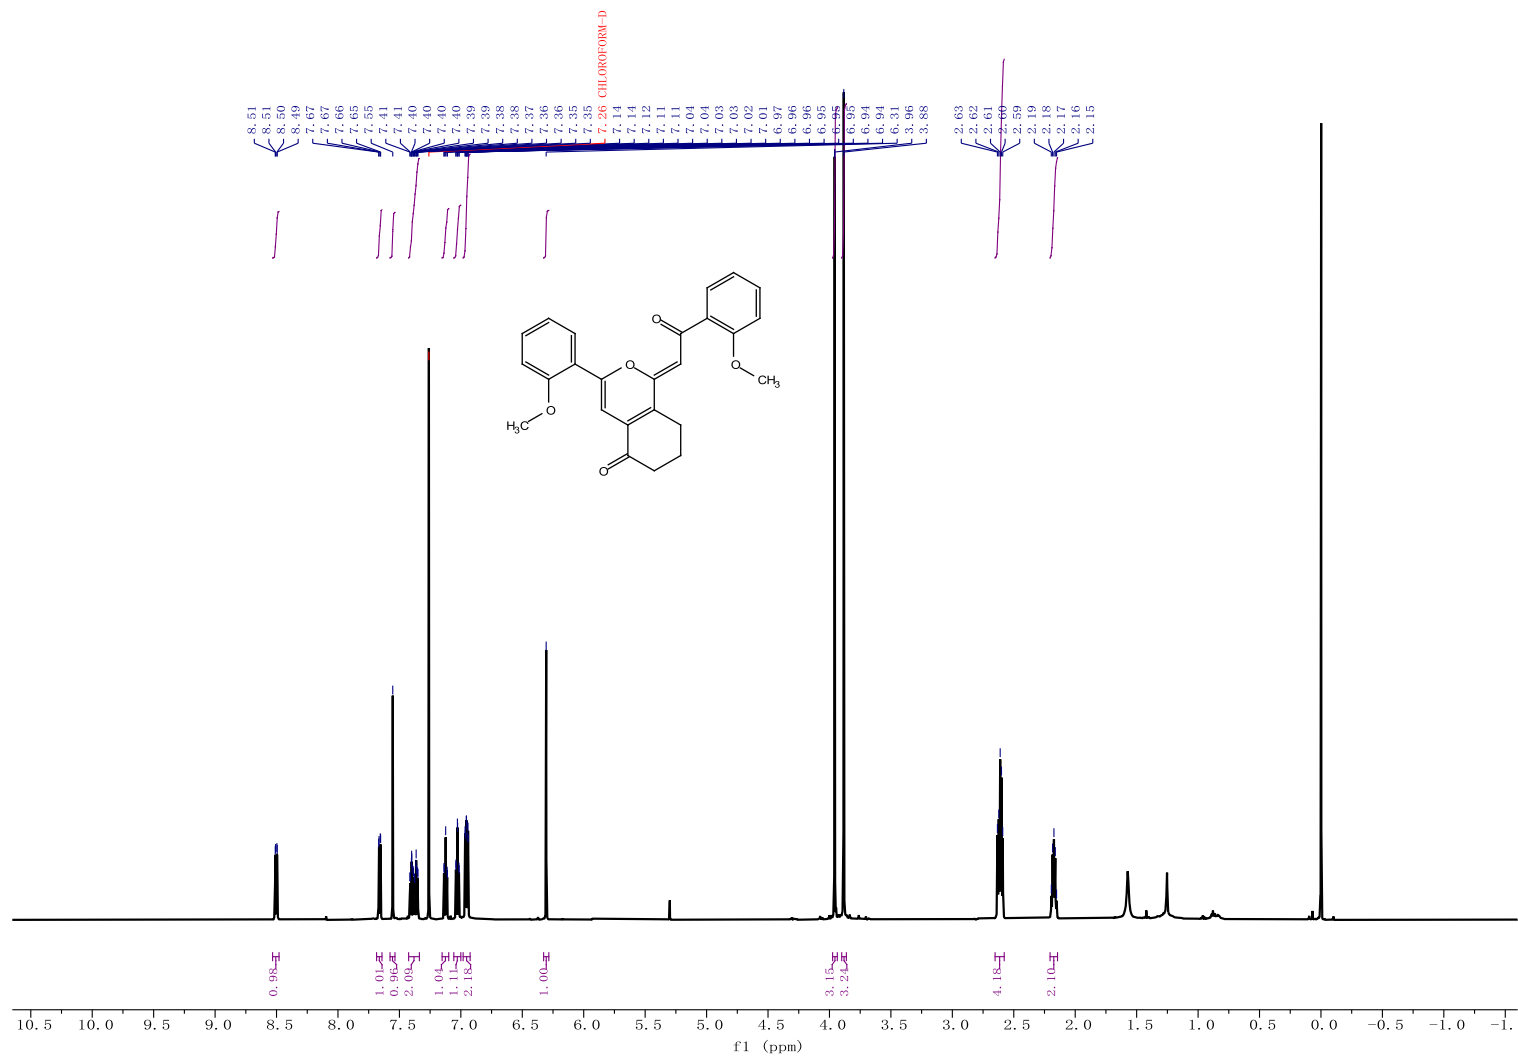

<sup>13</sup>C NMR (151 MHz, CDCl<sub>3</sub>) of **6b**

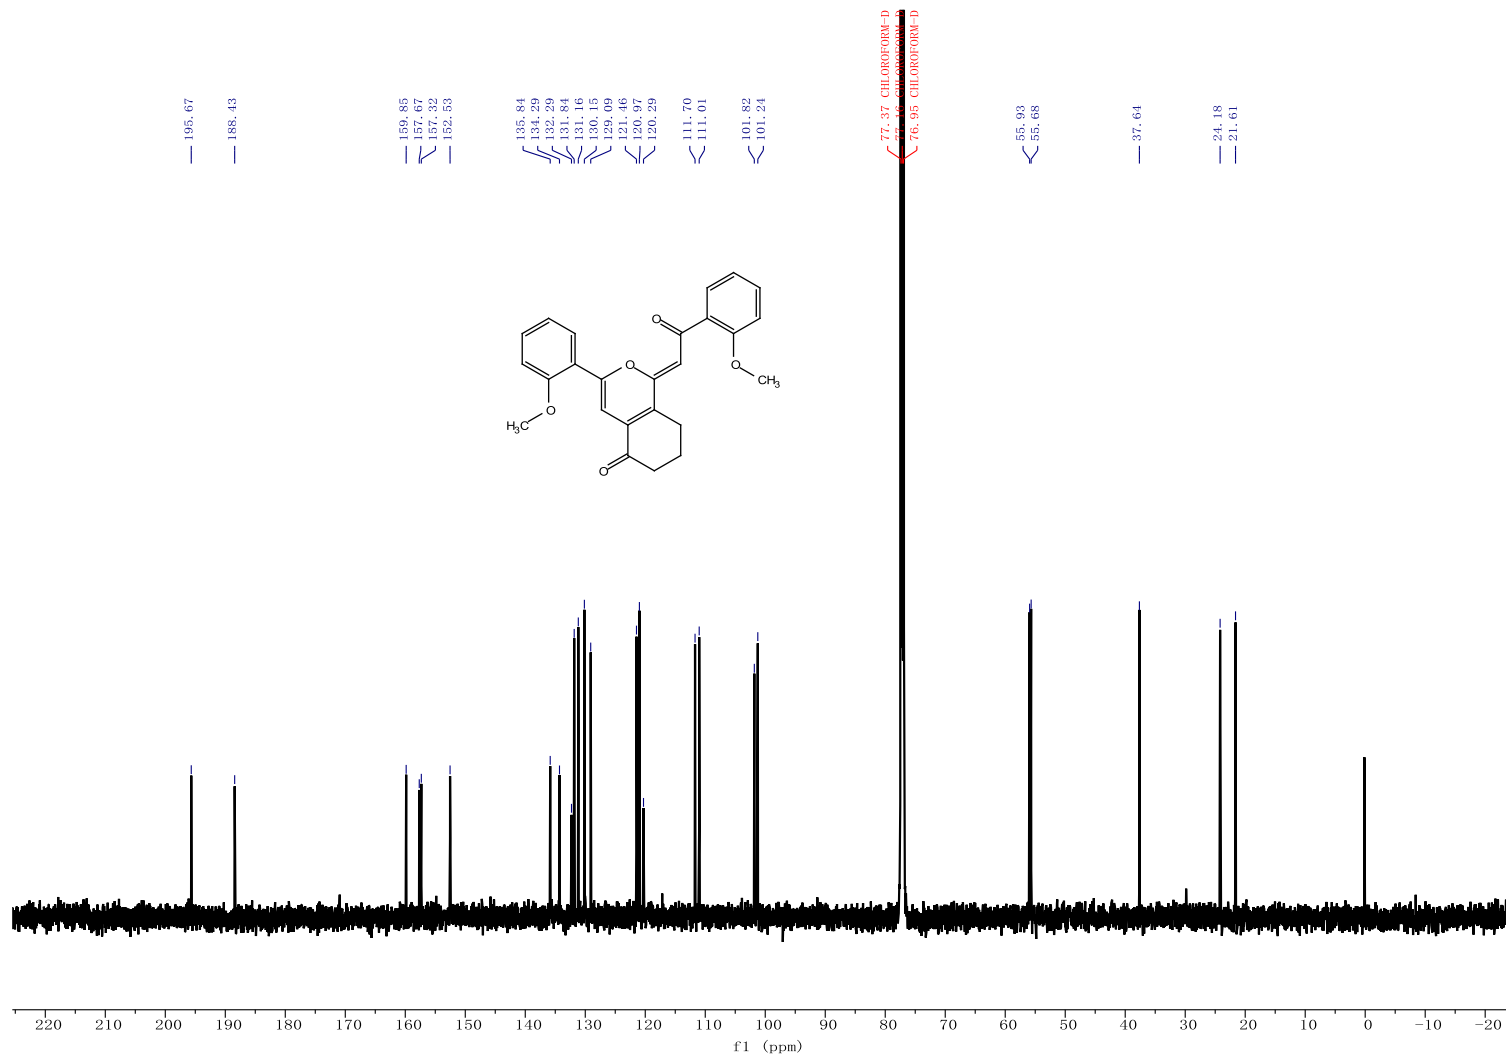

<sup>1</sup>H NMR (600 MHz, CDCl<sub>3</sub>) of **6c**

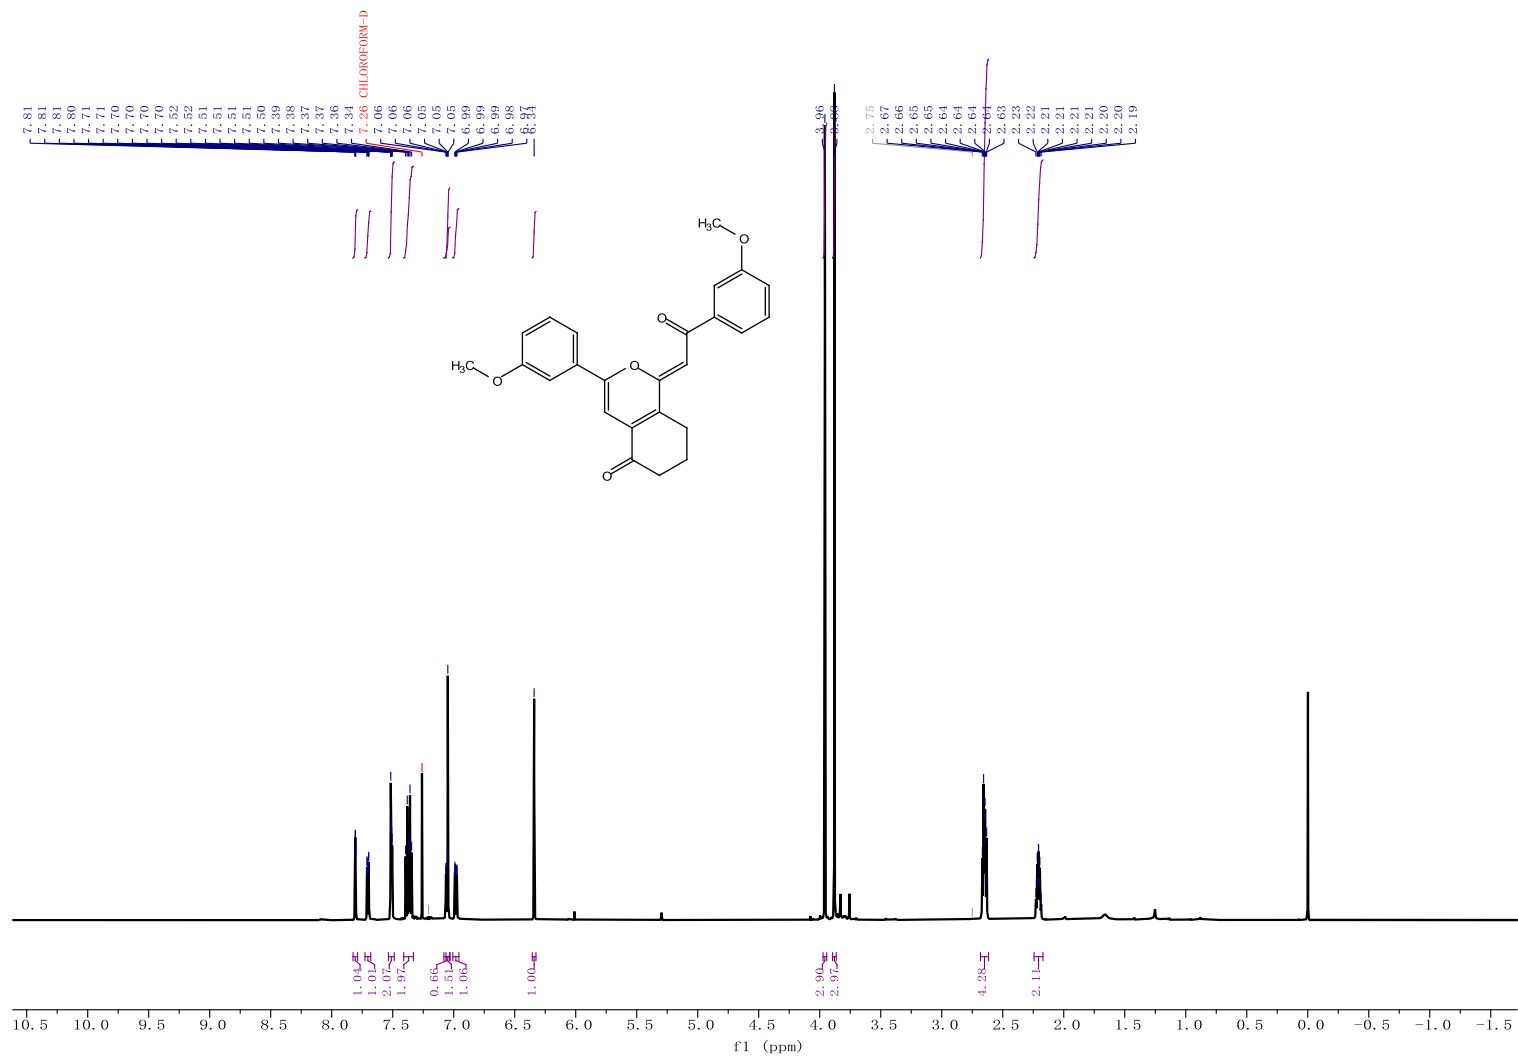

$^{13}\text{C}$  NMR (151 MHz,  $\text{CDCl}_3$ ) of **6c**

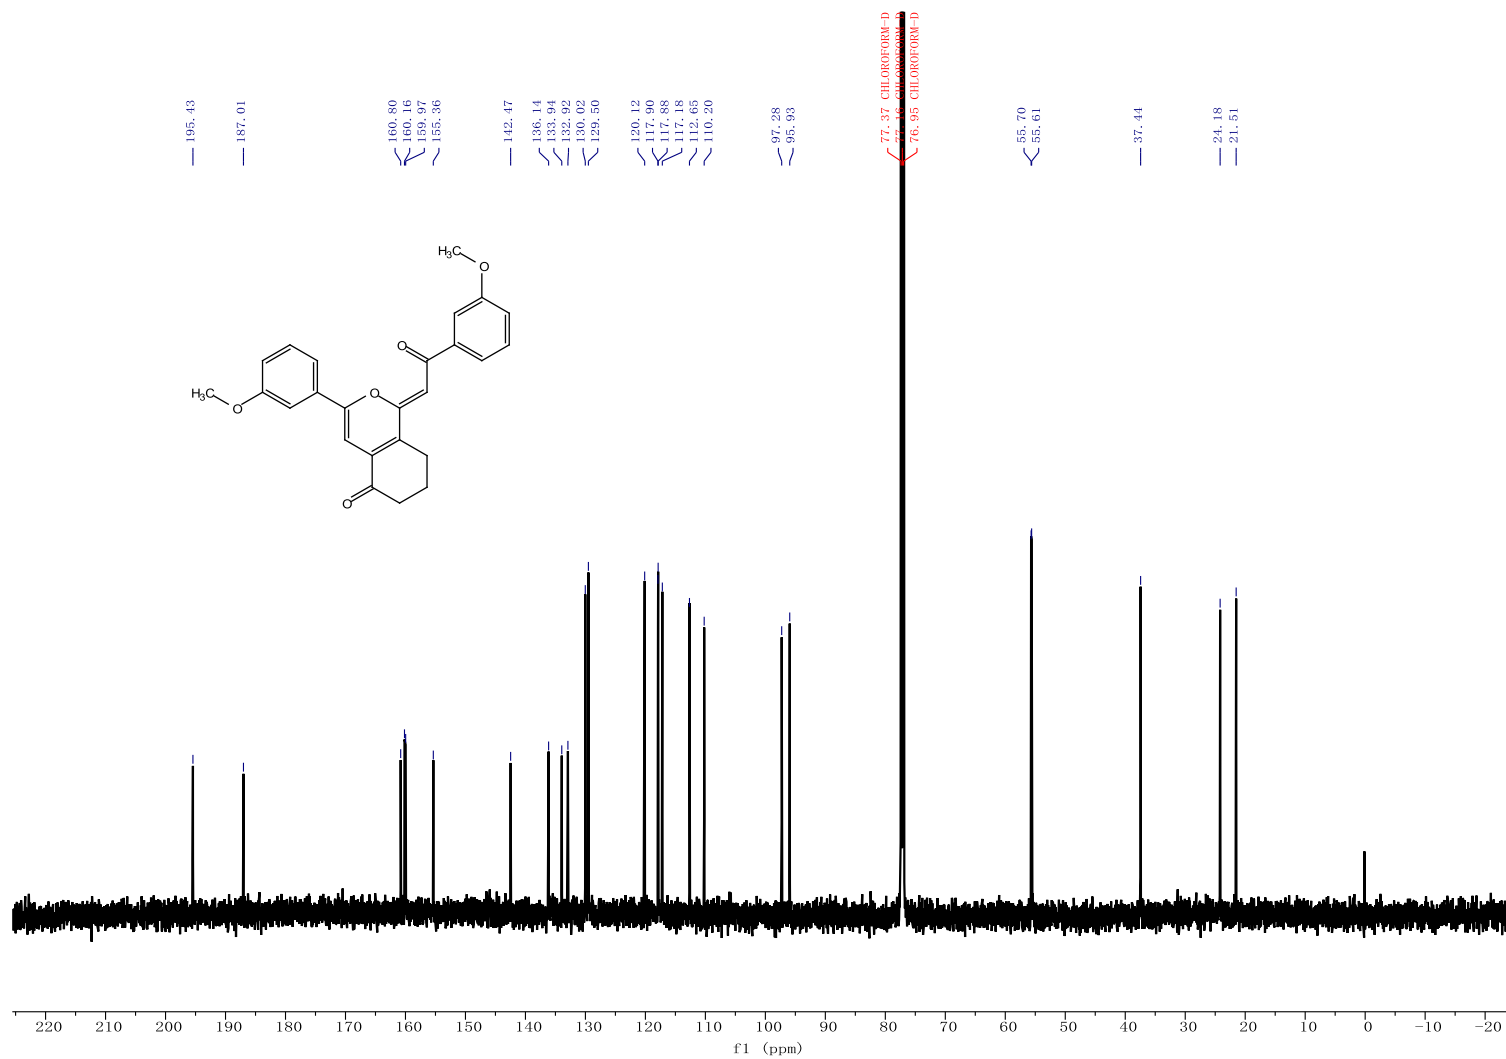



<sup>1</sup>H NMR (600 MHz, CDCl<sub>3</sub>) of **6d**

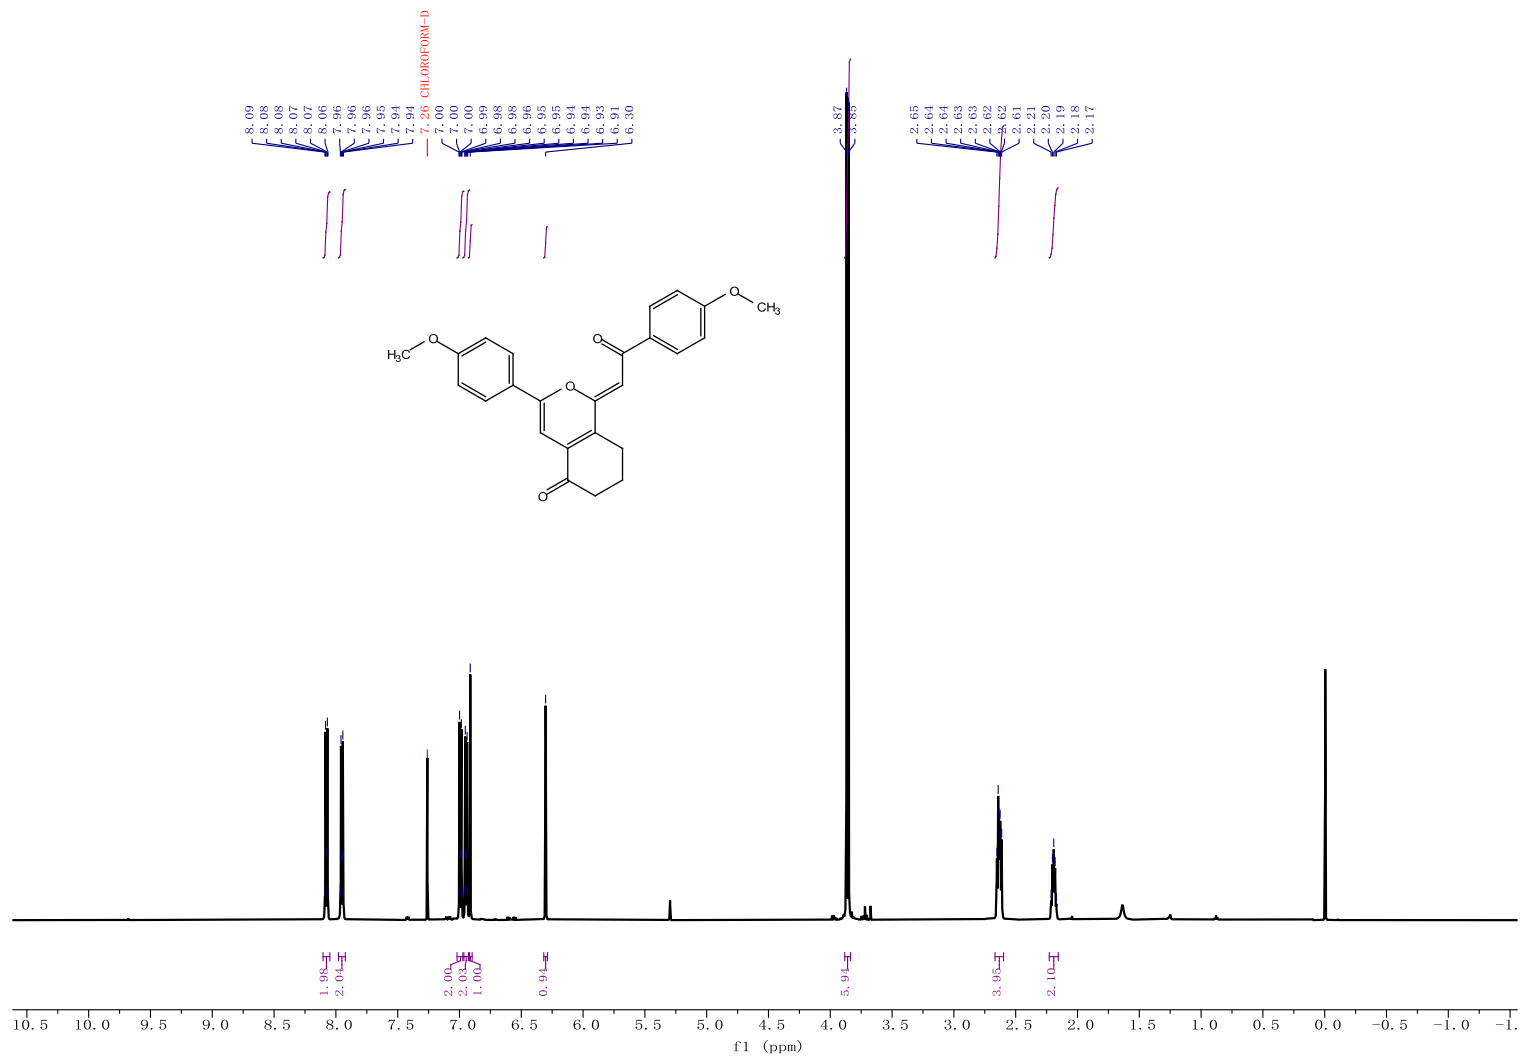

$^{13}\text{C}$  NMR (151 MHz,  $\text{CDCl}_3$ ) of **6d**

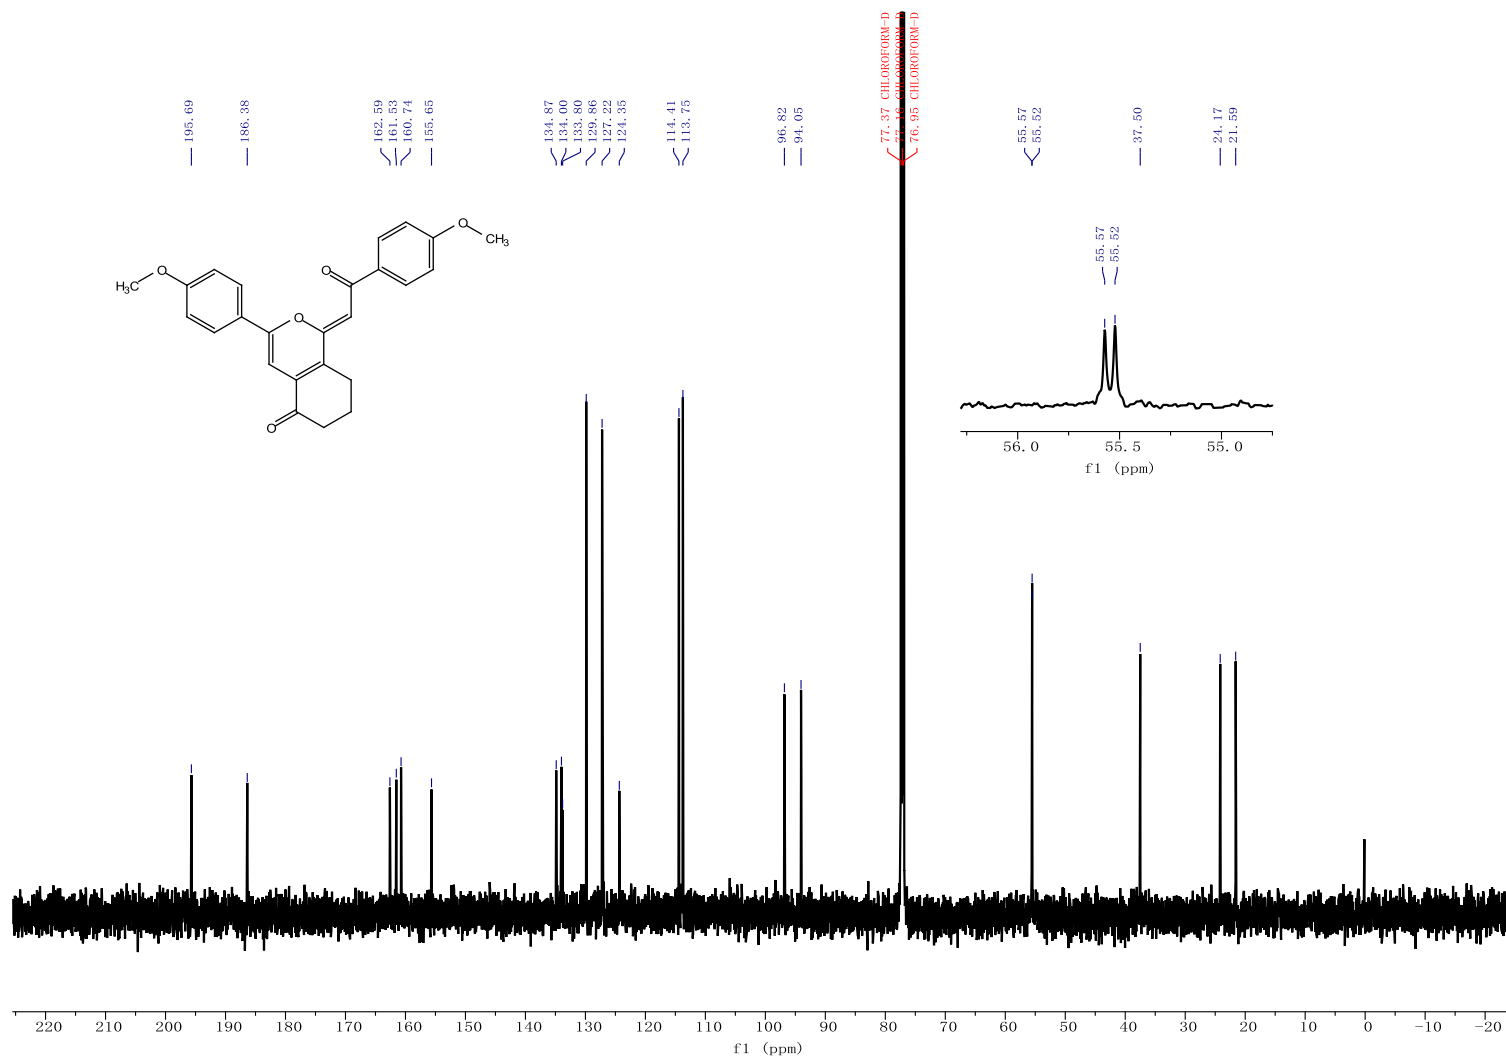

<sup>1</sup>H NMR (600 MHz, CDCl<sub>3</sub>) of **6e**

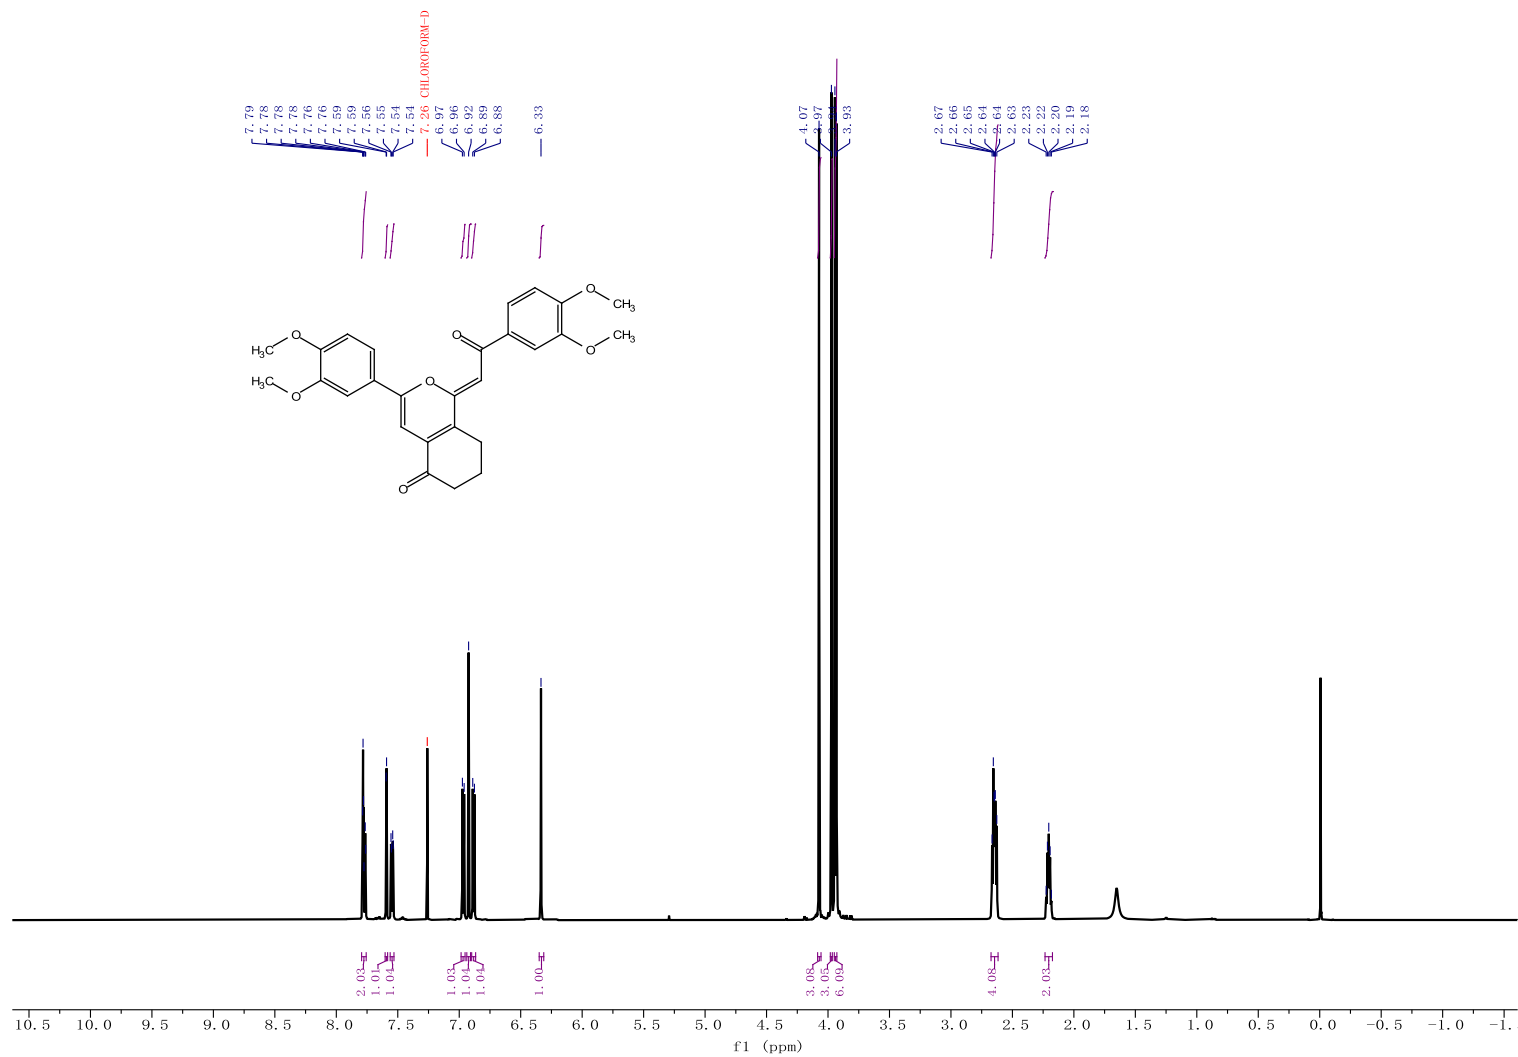

<sup>13</sup>C NMR (151 MHz, CDCl<sub>3</sub>) of **6e**

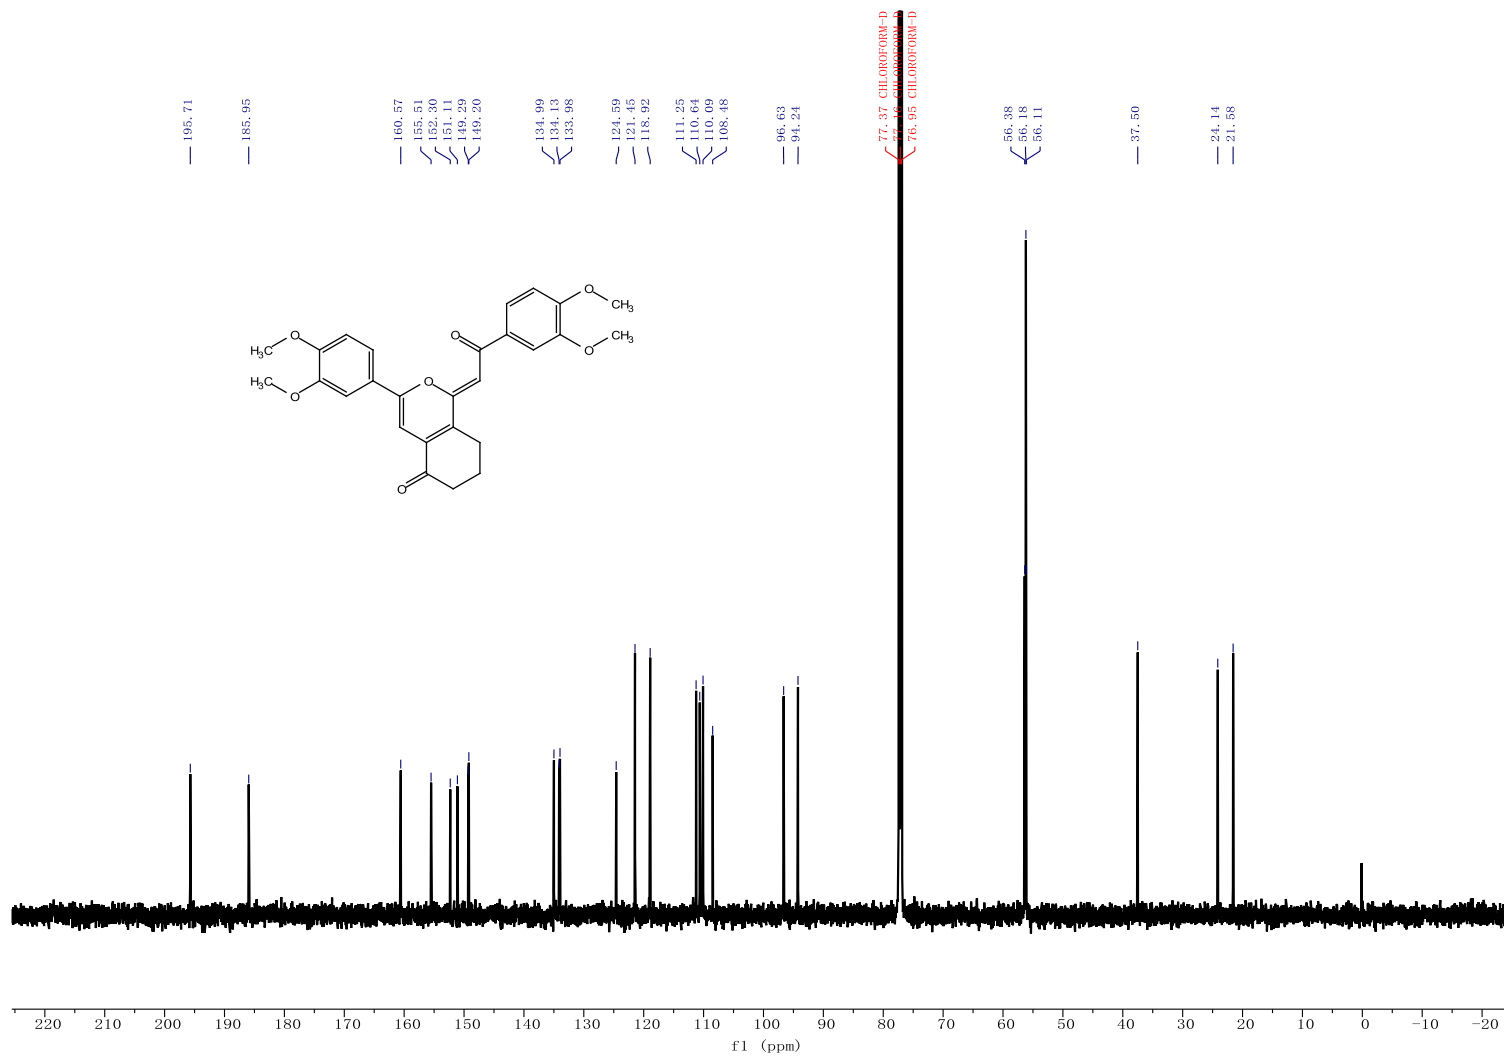

<sup>1</sup>H NMR (600 MHz, CDCl<sub>3</sub>) of **6f**

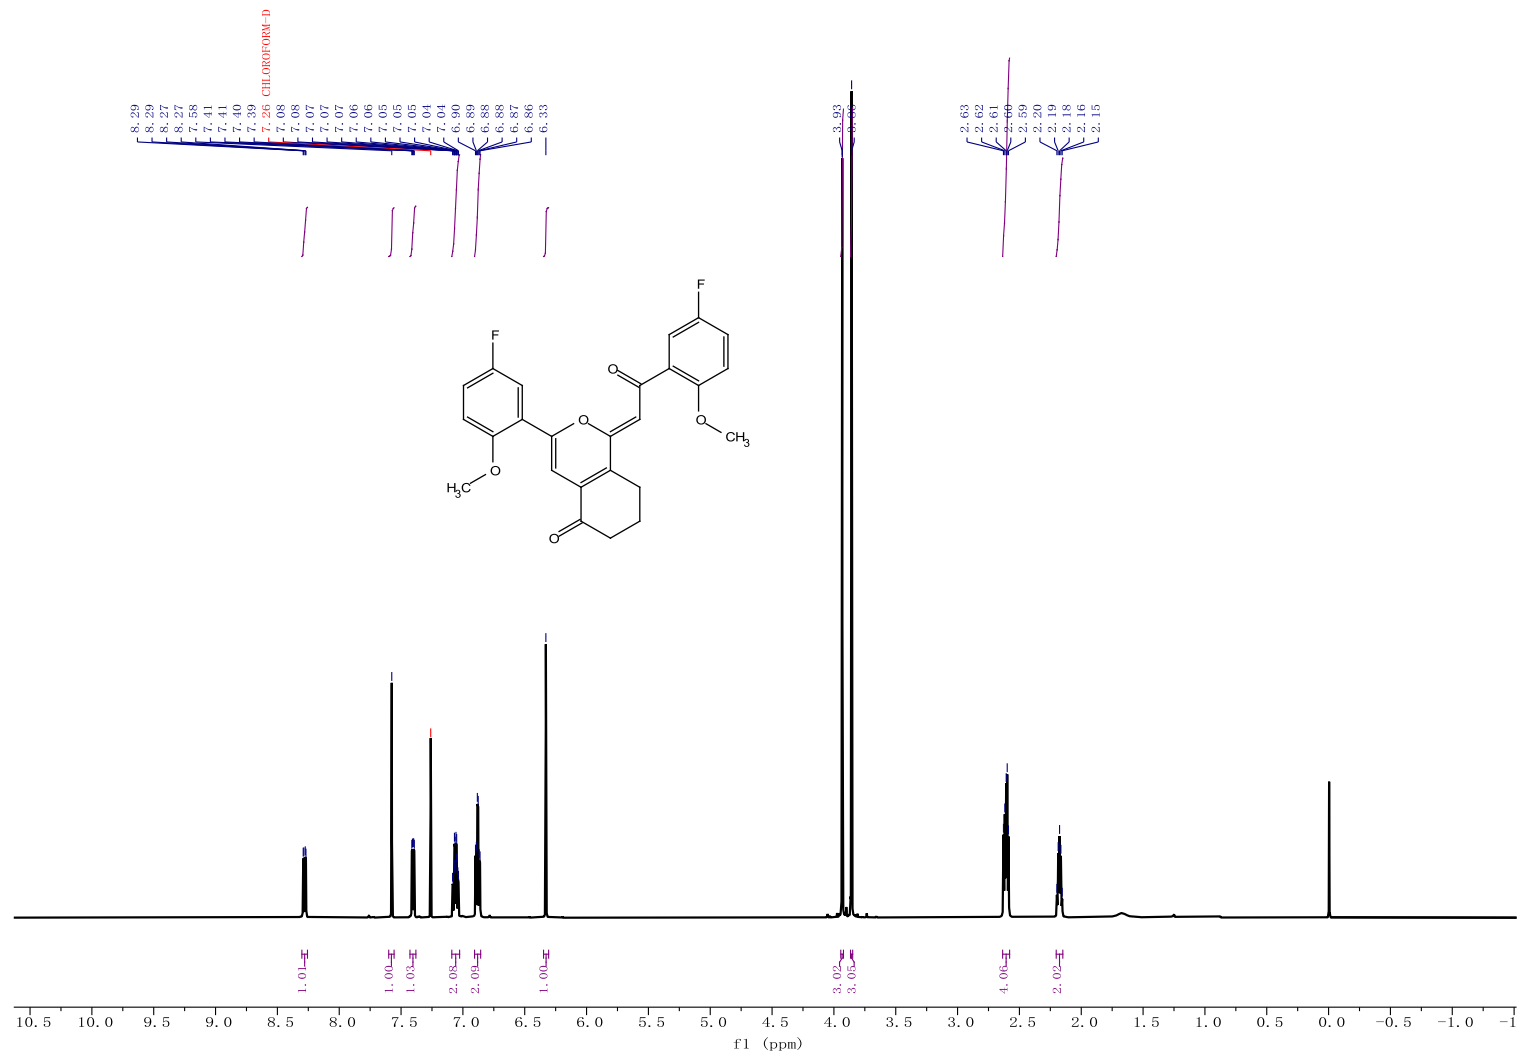

<sup>13</sup>C NMR (151 MHz, CDCl<sub>3</sub>) of **6f**

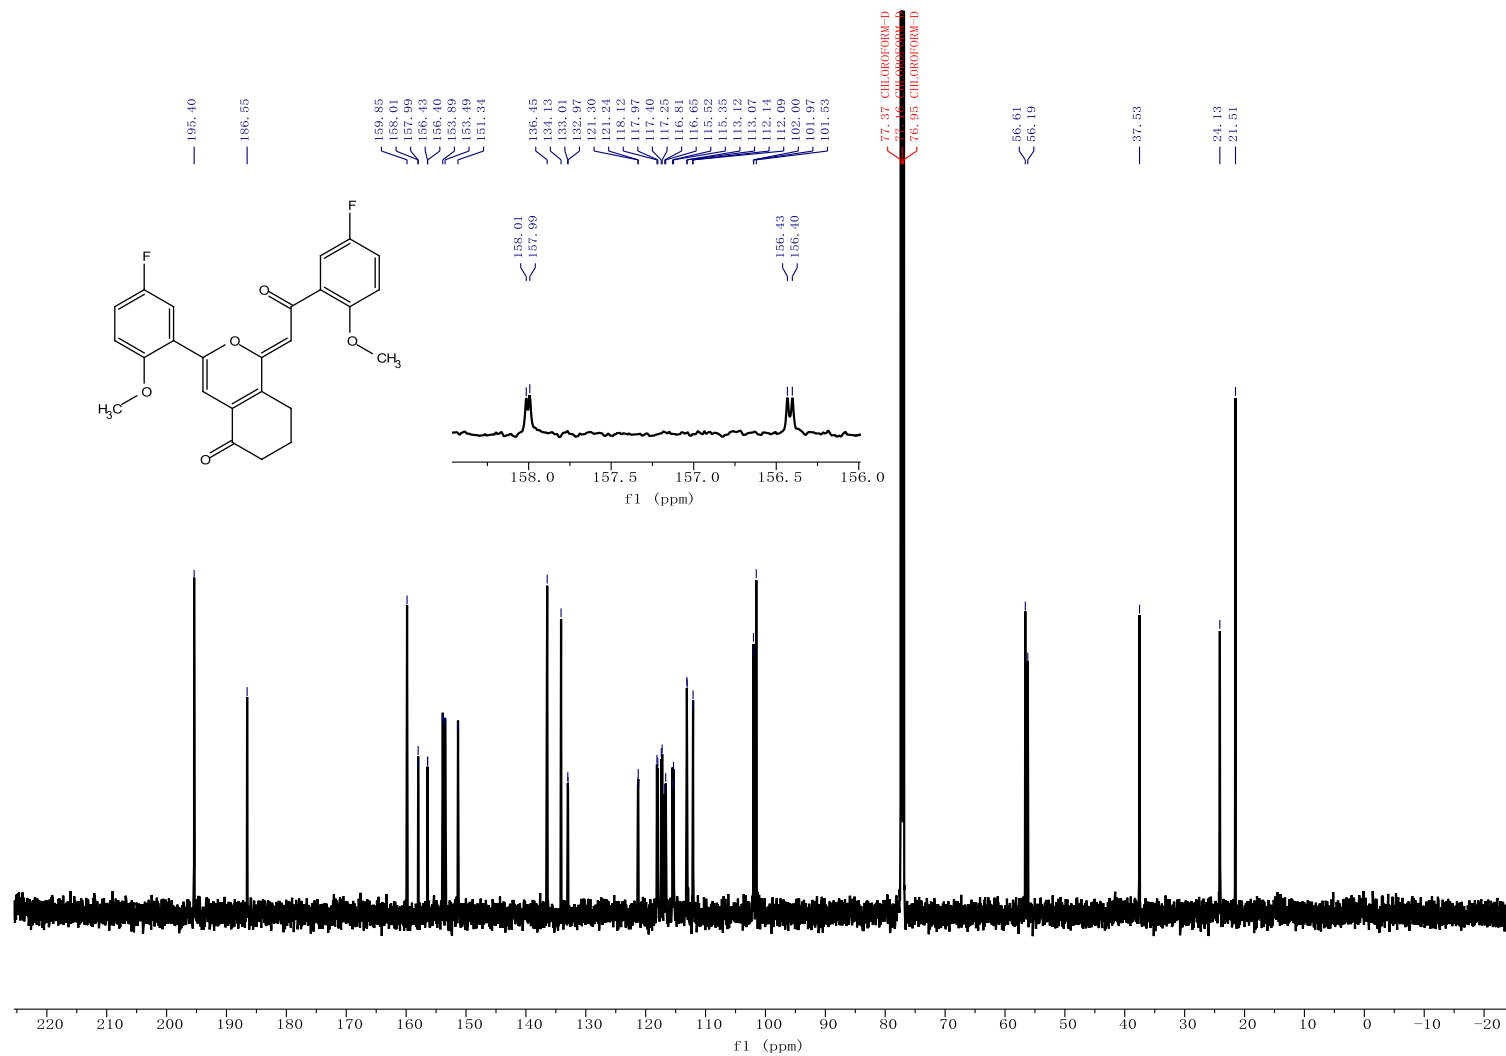

$^{19}\text{F}$  NMR (565 MHz,  $\text{CDCl}_3$ ) of **6f**

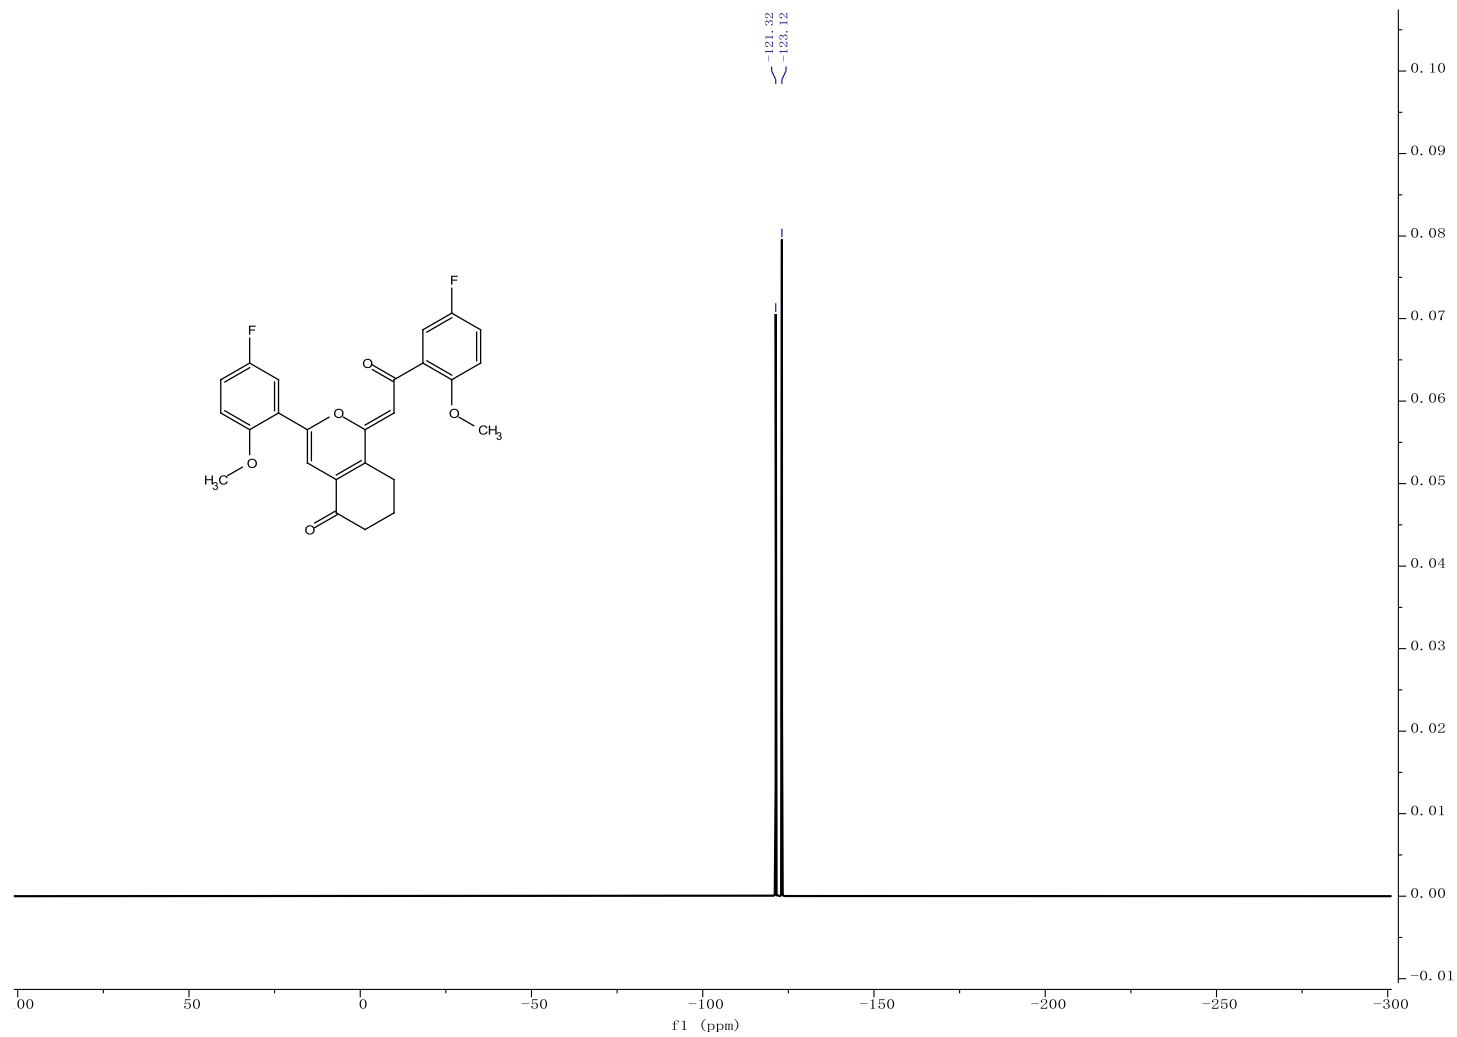

S191

$^1\text{H}$  NMR (600 MHz,  $\text{CDCl}_3$ ) of **6g**

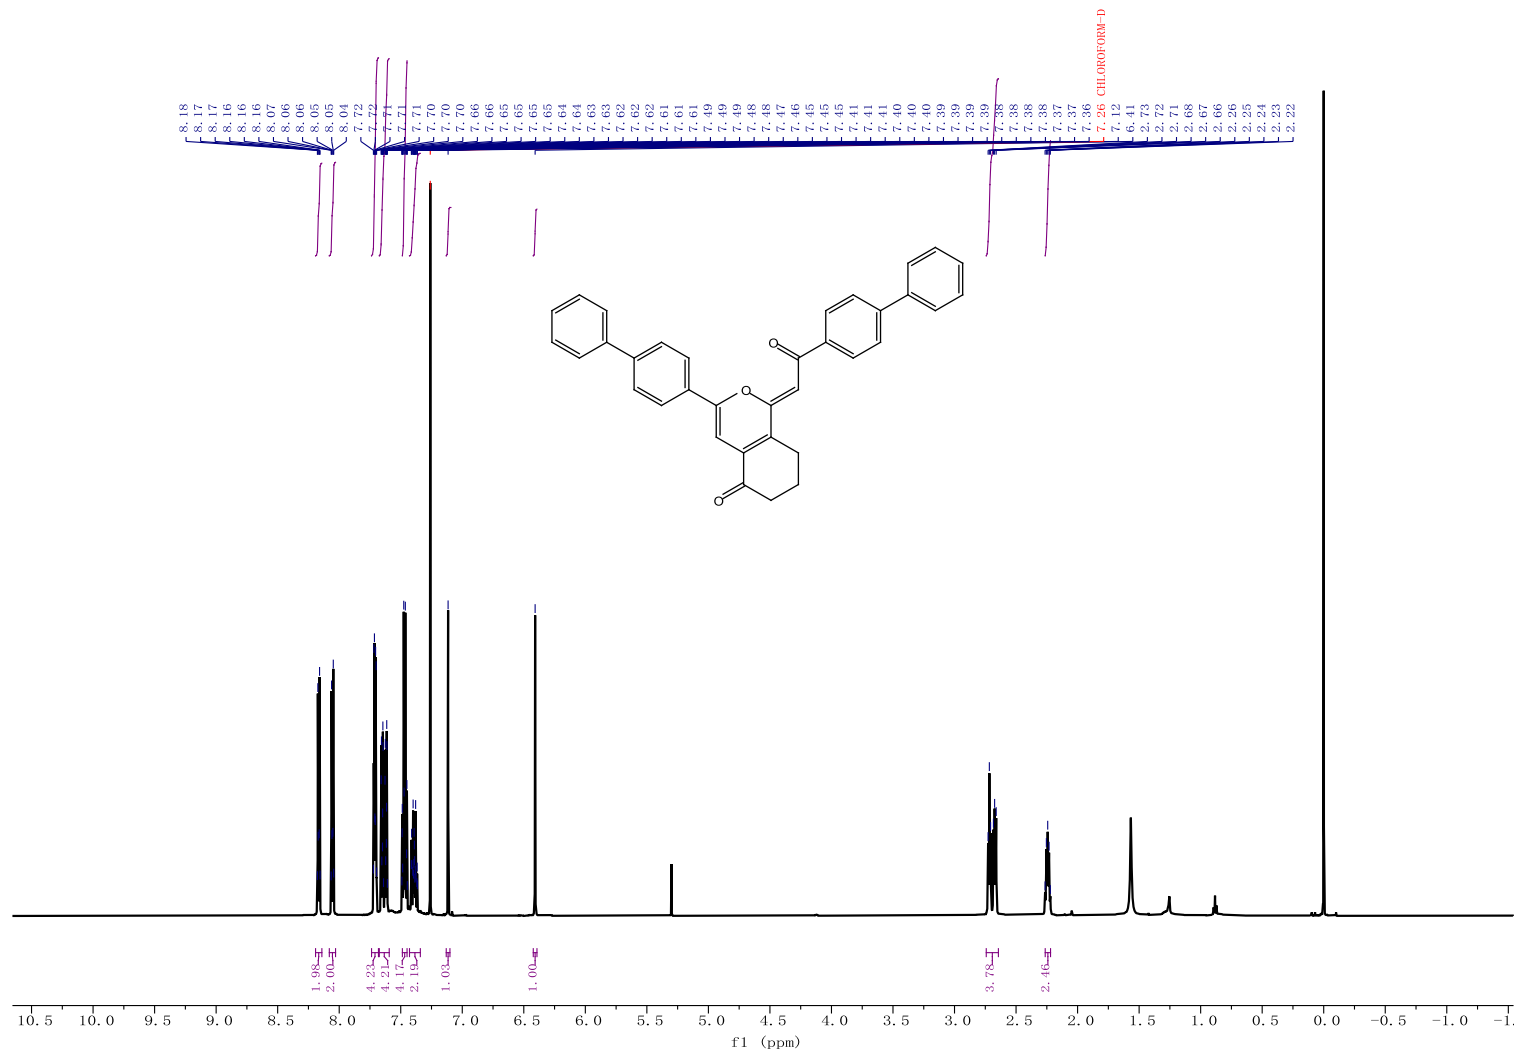



$^{13}\text{C}$  NMR (101 MHz,  $\text{CDCl}_3$ ) of **6g**

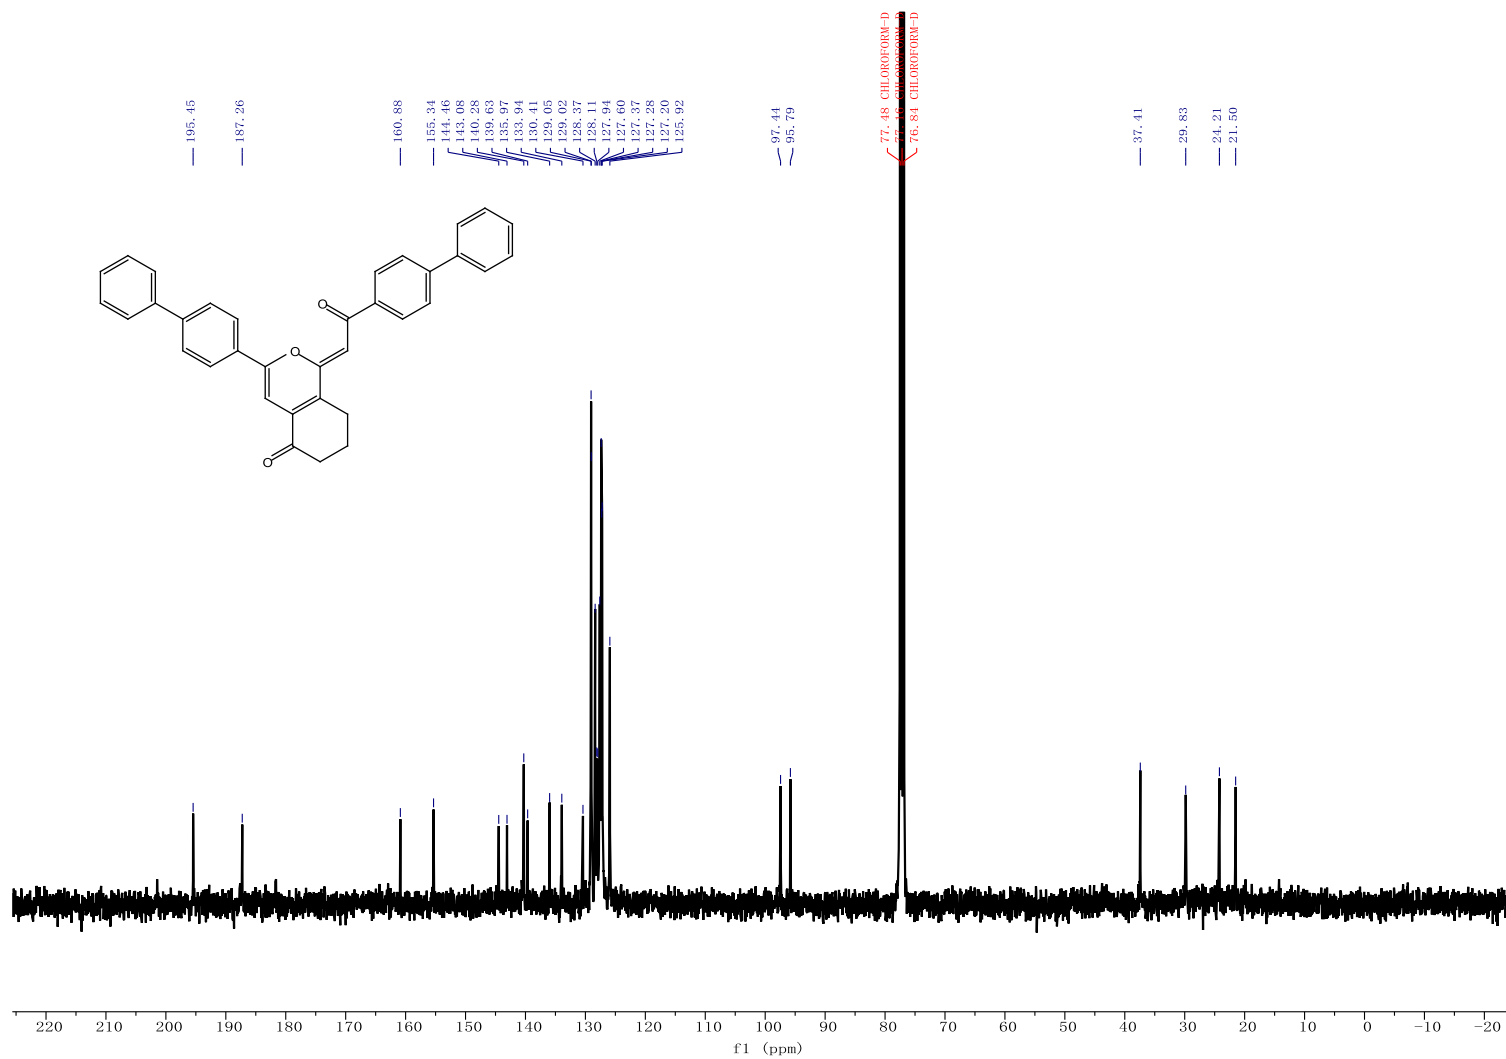

<sup>1</sup>H NMR (600 MHz, CDCl<sub>3</sub>) of **6h**

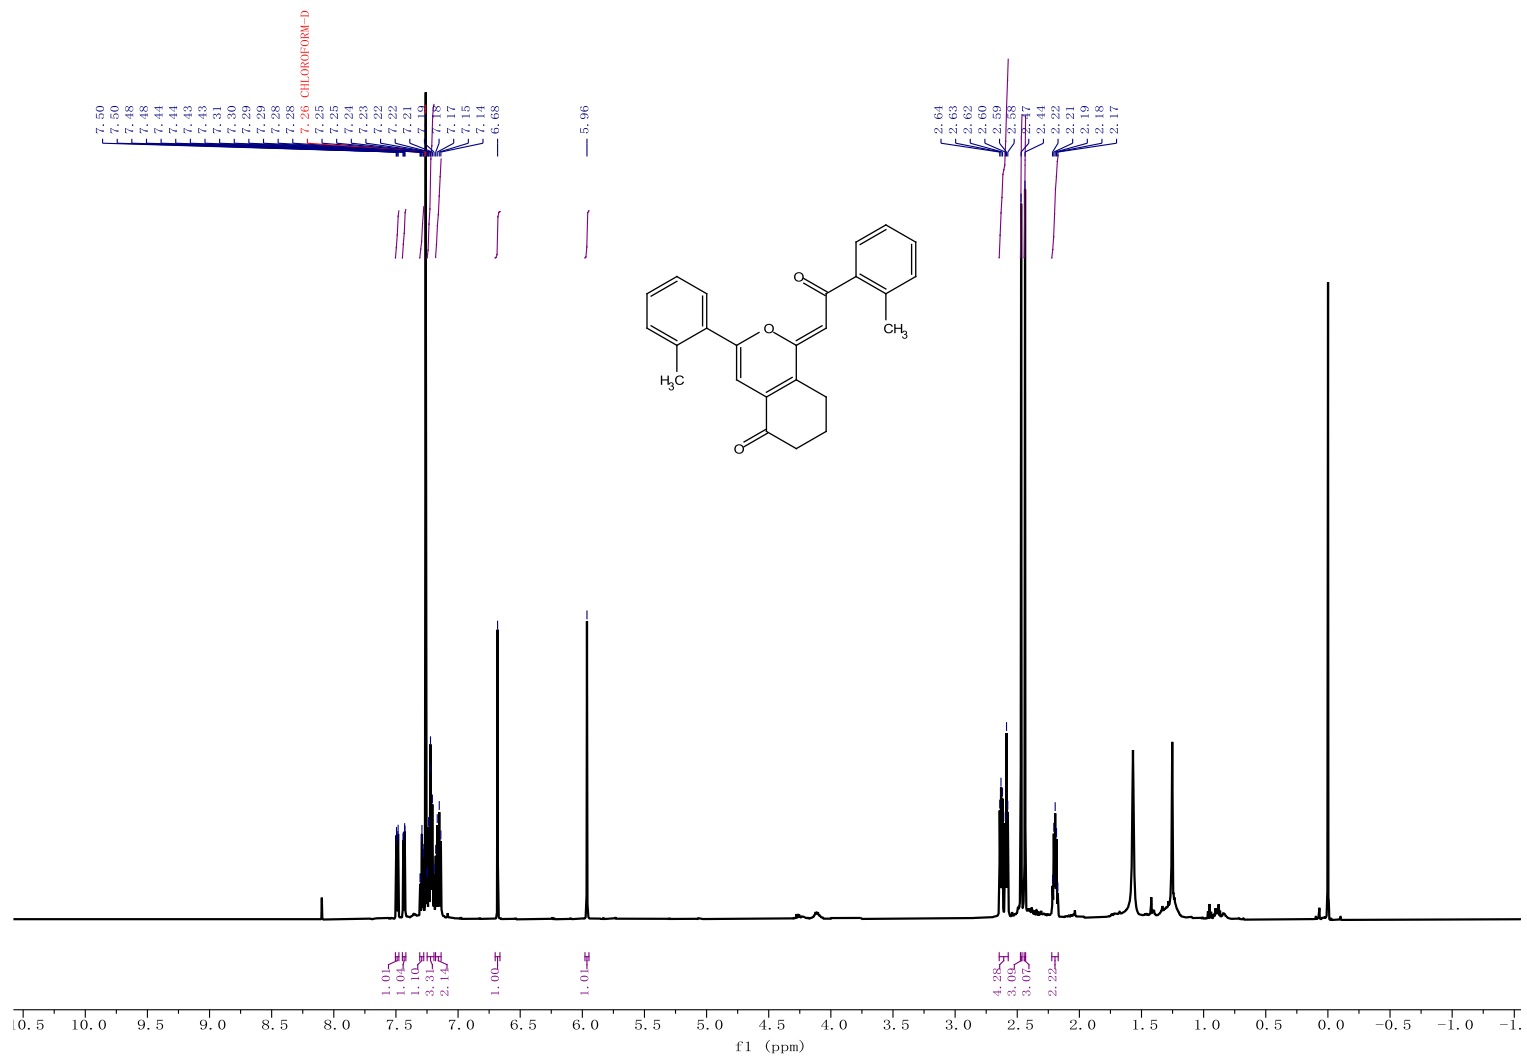

<sup>13</sup>C NMR (151 MHz, CDCl<sub>3</sub>) of **6h**

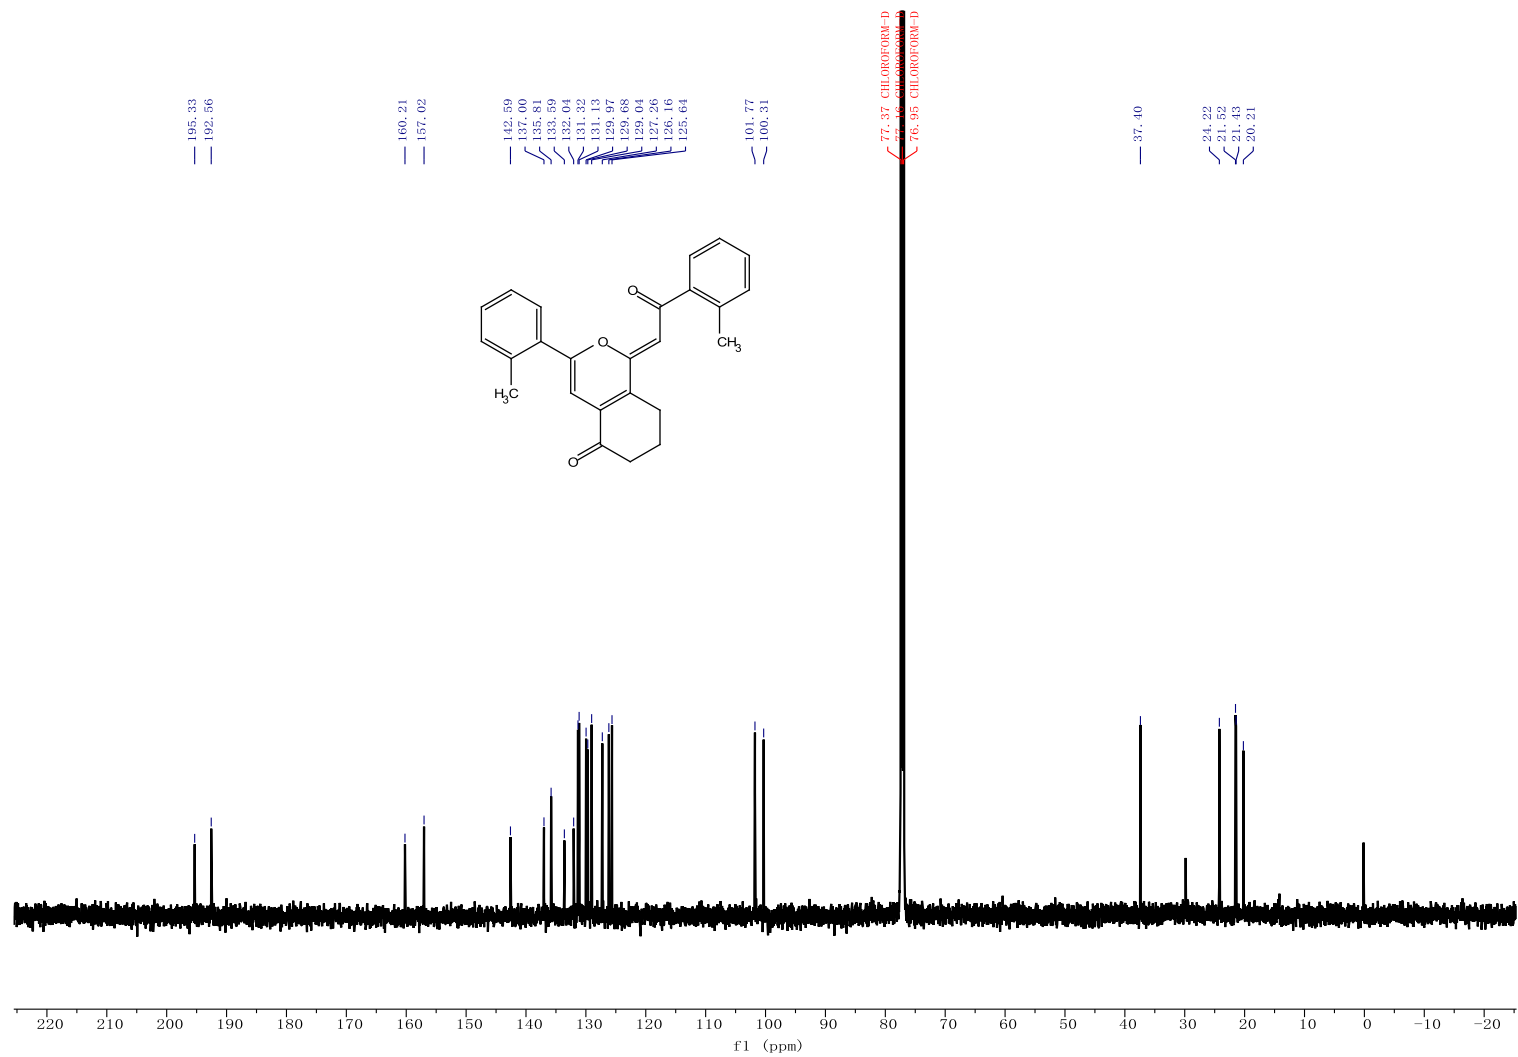

$^1\text{H}$  NMR (600 MHz,  $\text{CDCl}_3$ ) of **6i**

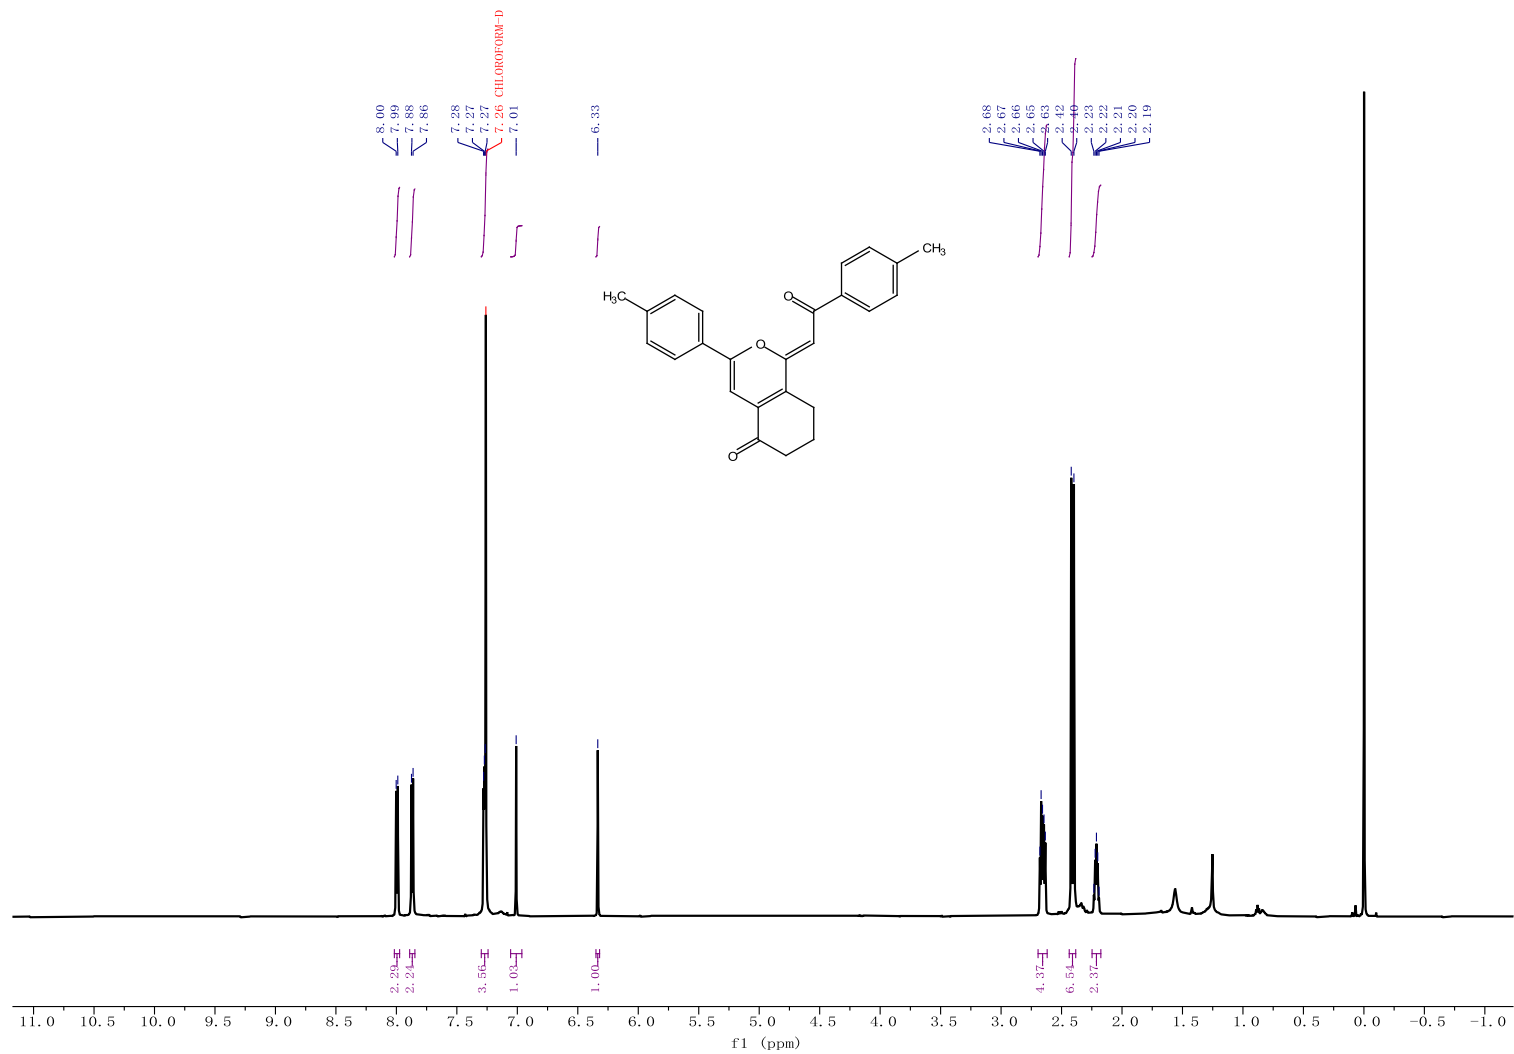

$^{13}\text{C}$  NMR (151 MHz,  $\text{CDCl}_3$ ) of **6i**

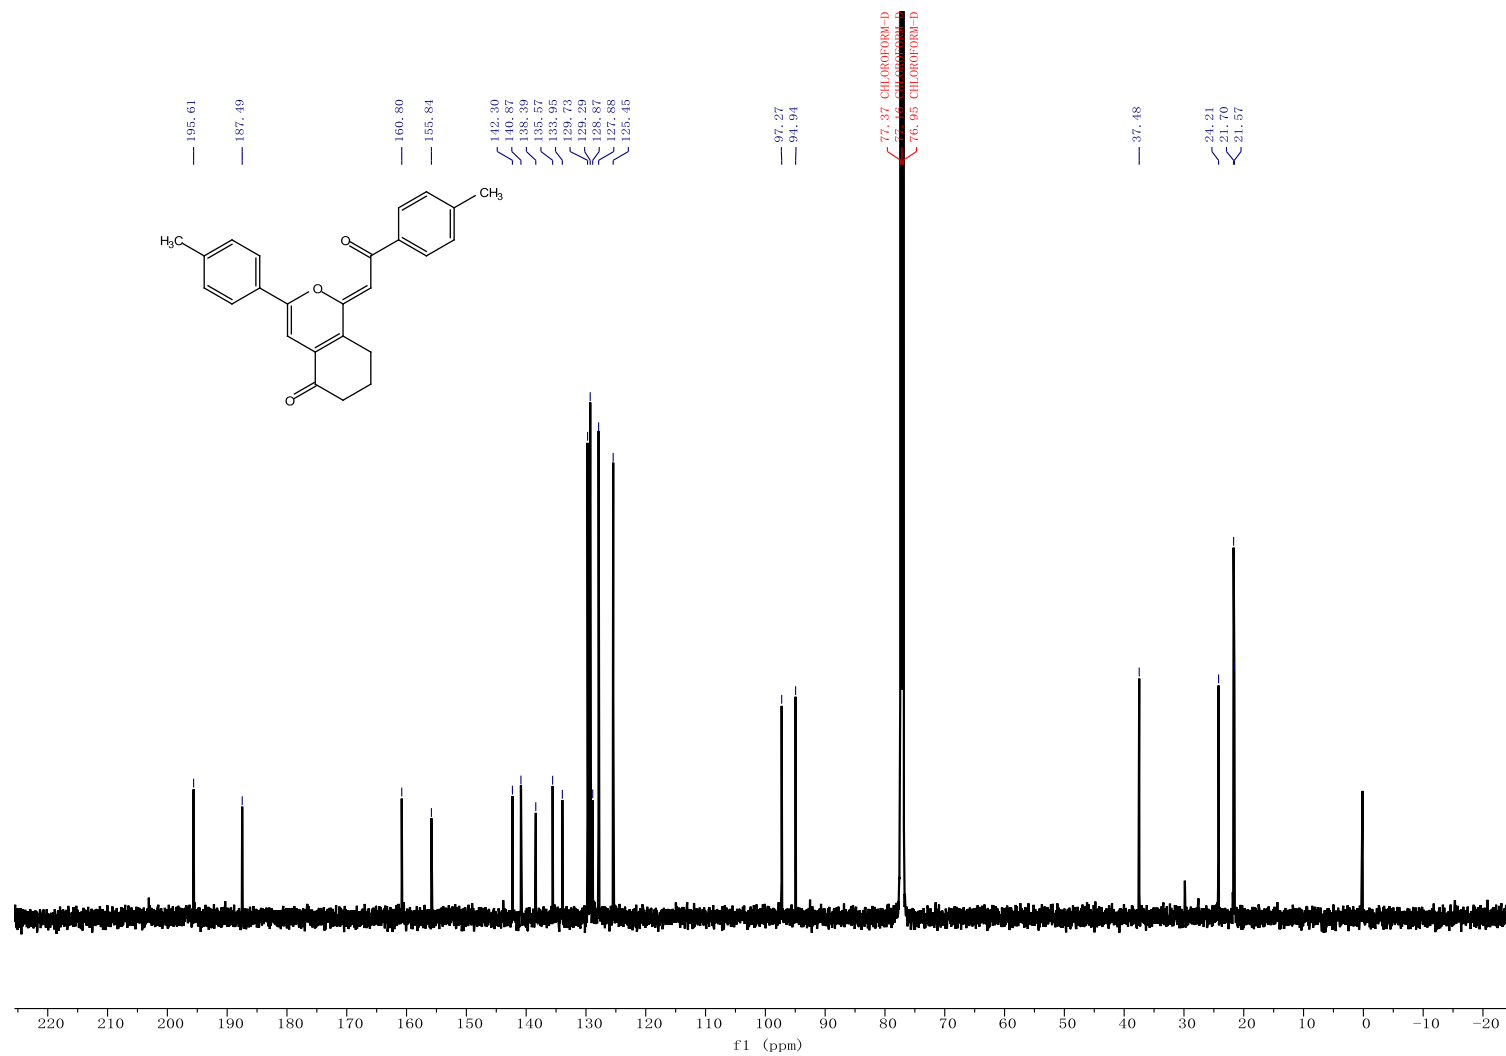

<sup>1</sup>H NMR (600 MHz, CDCl<sub>3</sub>) of **6j**

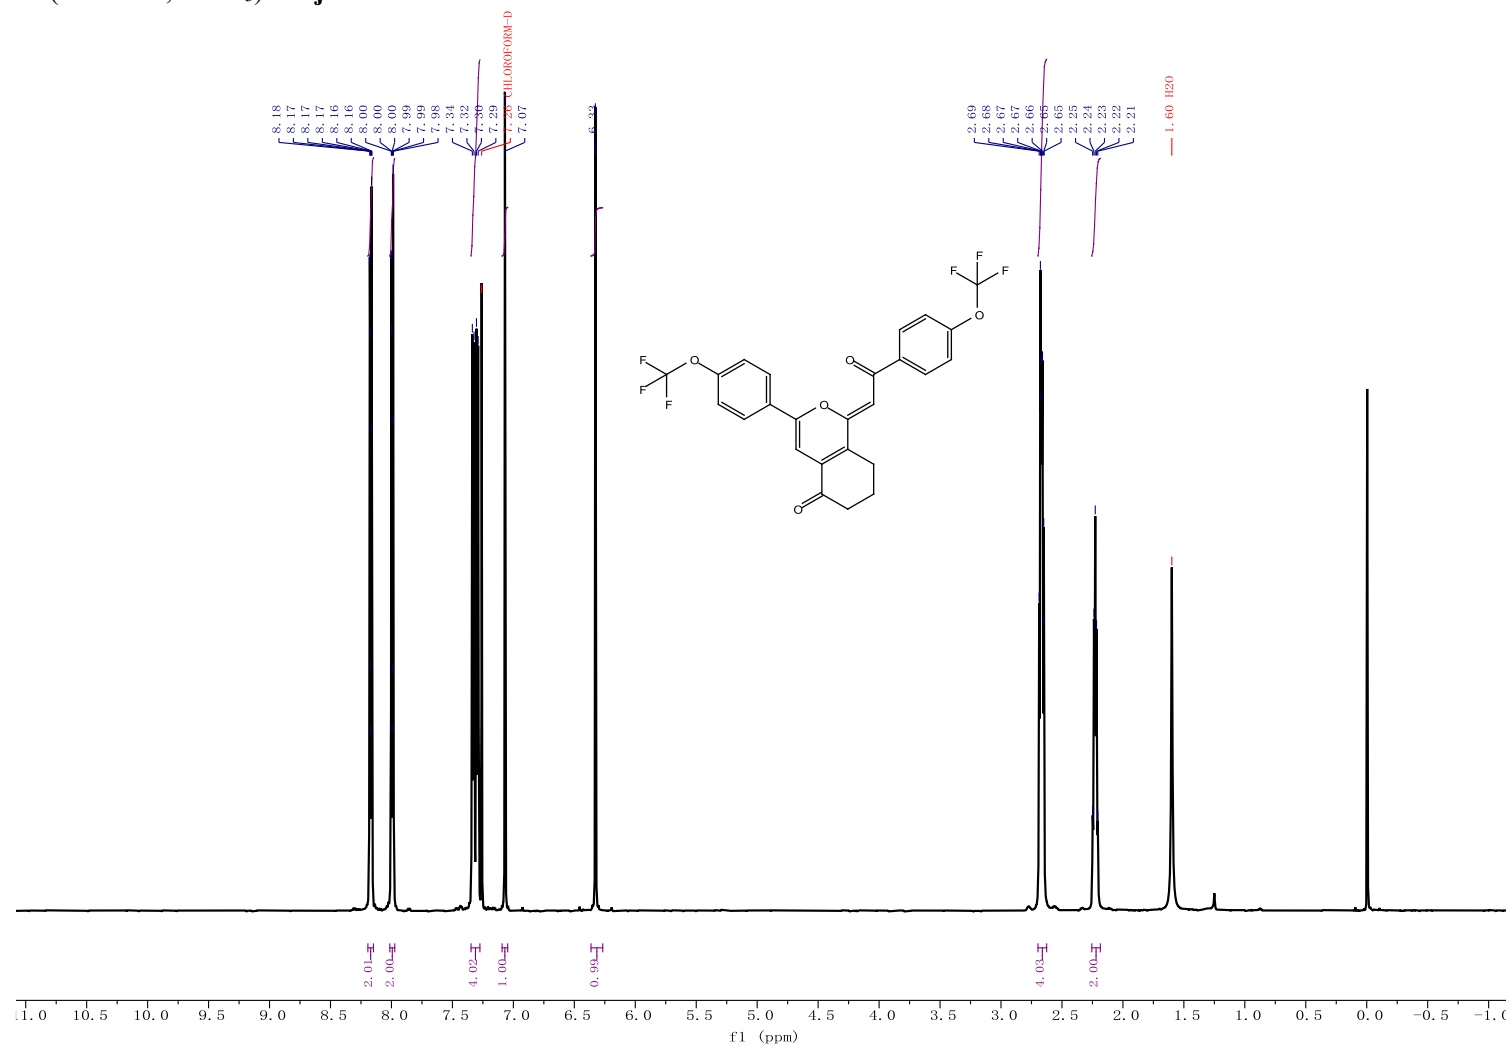

<sup>13</sup>C NMR (151 MHz, CDCl<sub>3</sub>) of **6j**

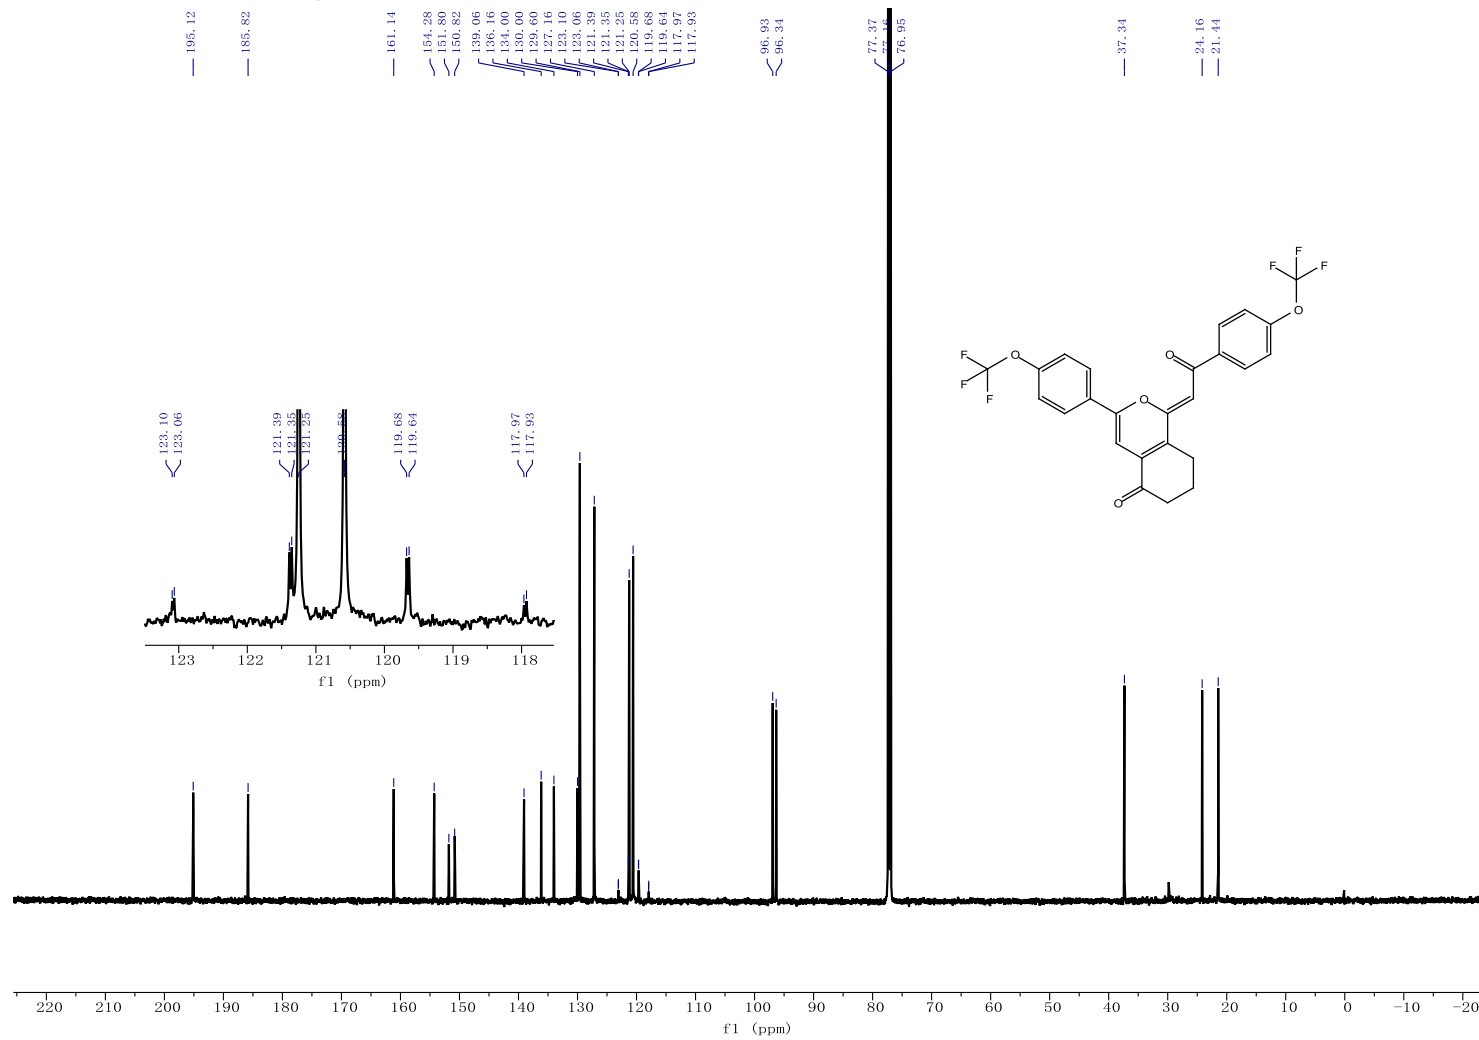

$^{19}\text{F}$  NMR (565 MHz,  $\text{CDCl}_3$ ) of **6j**

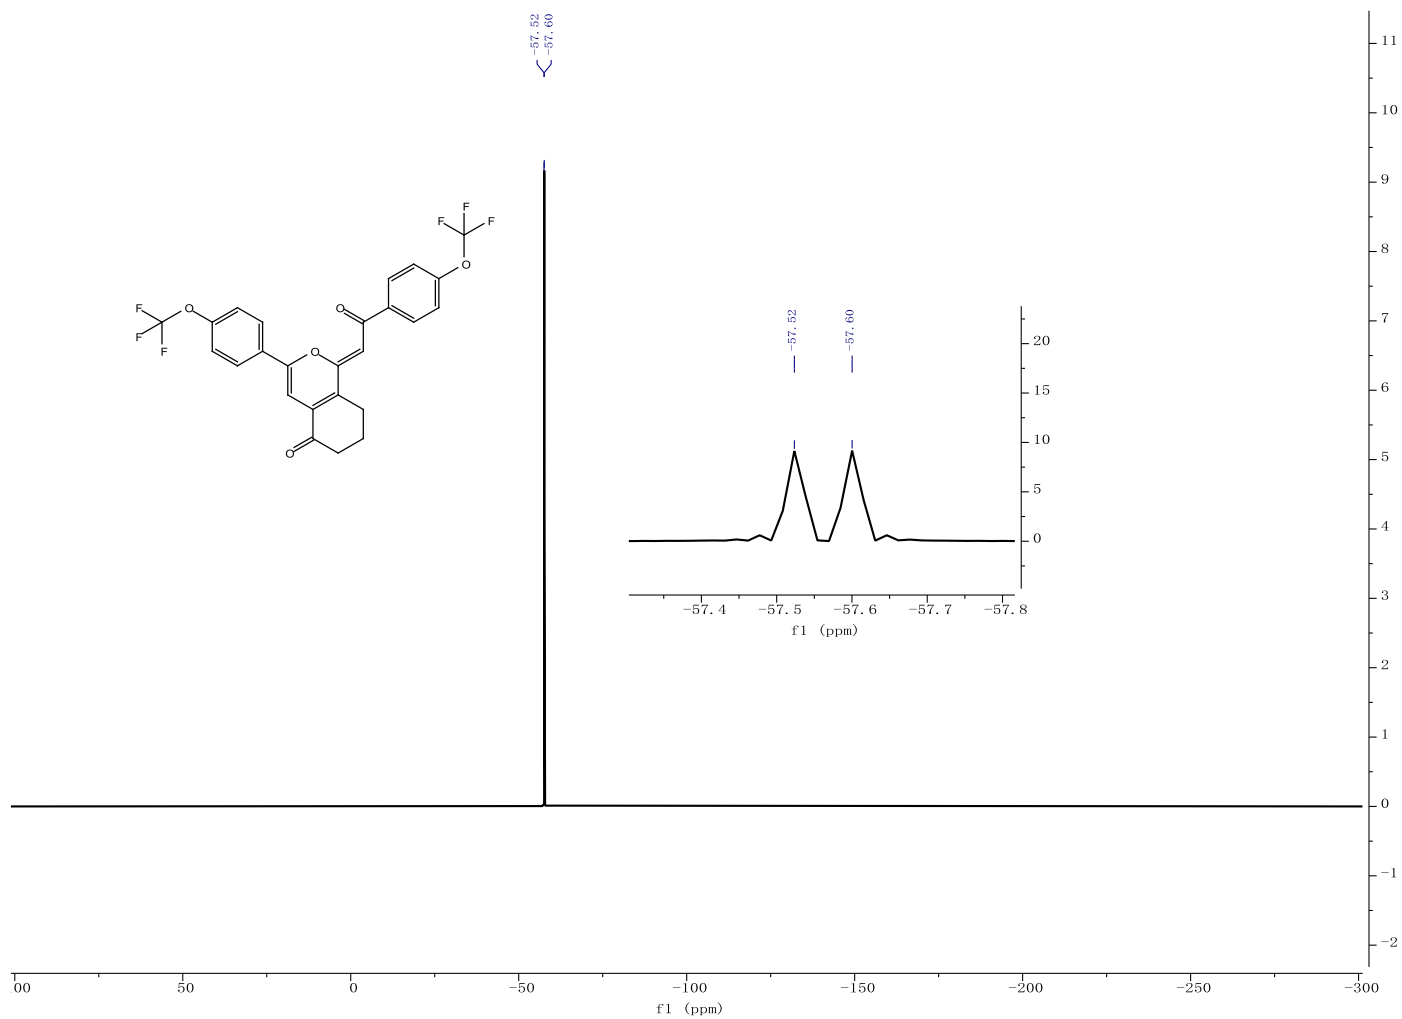

S200



<sup>1</sup>H NMR (600 MHz, CDCl<sub>3</sub>) of **6k**

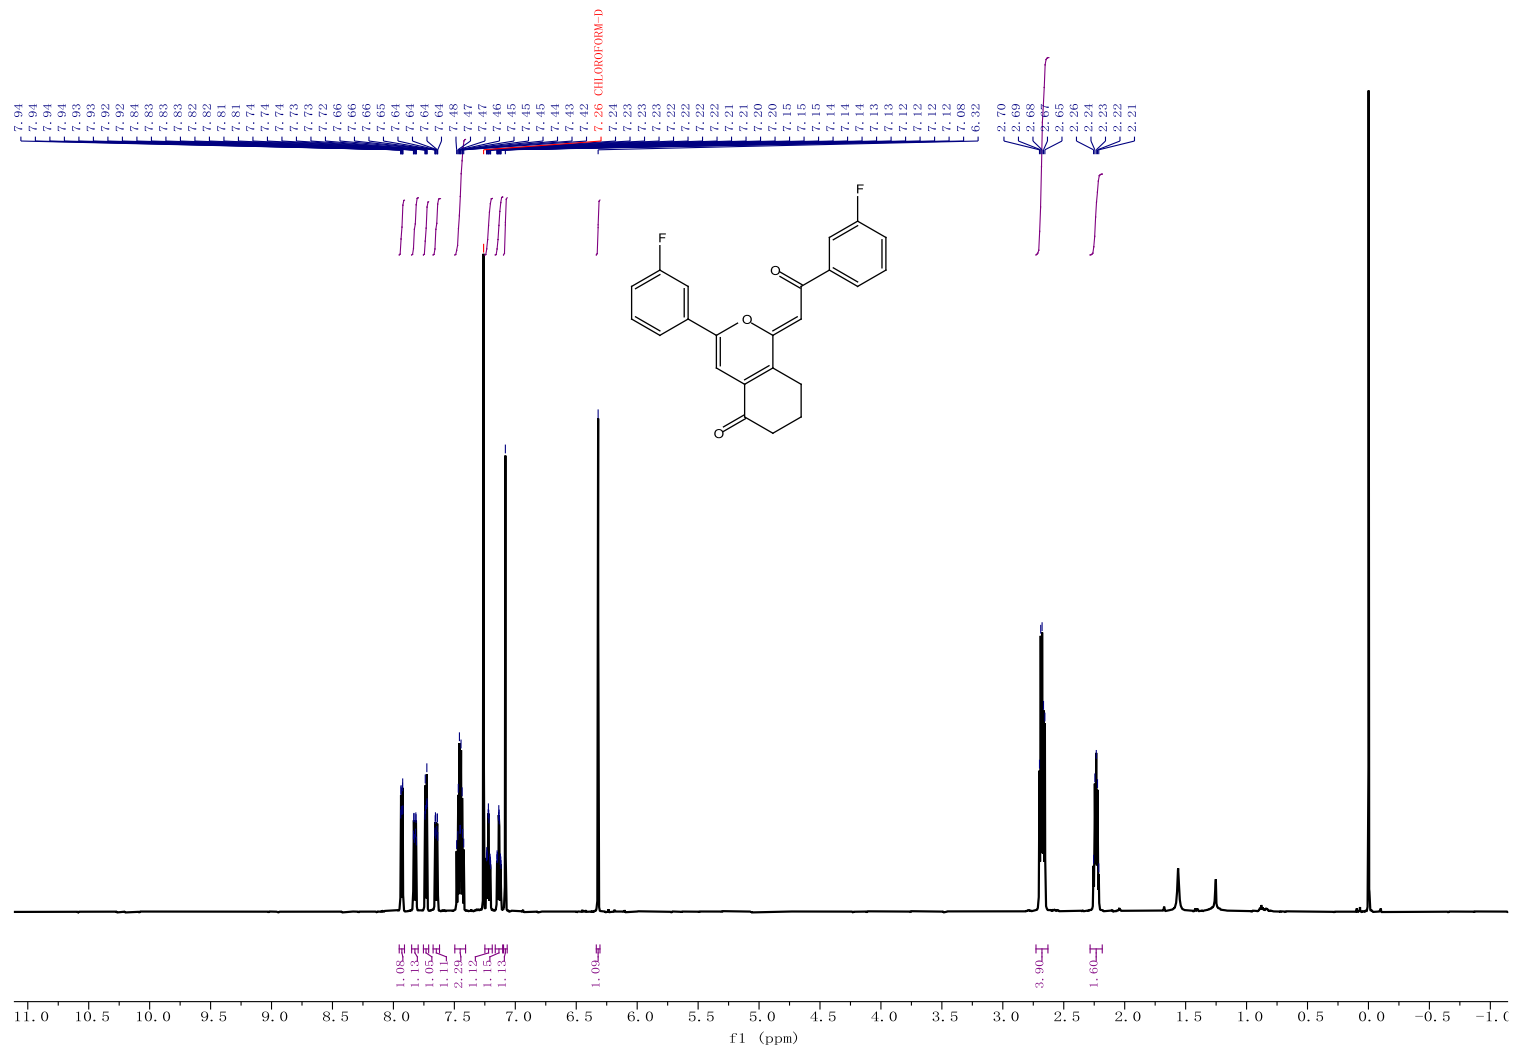

<sup>13</sup>C NMR (151 MHz, CDCl<sub>3</sub>) of **6k**

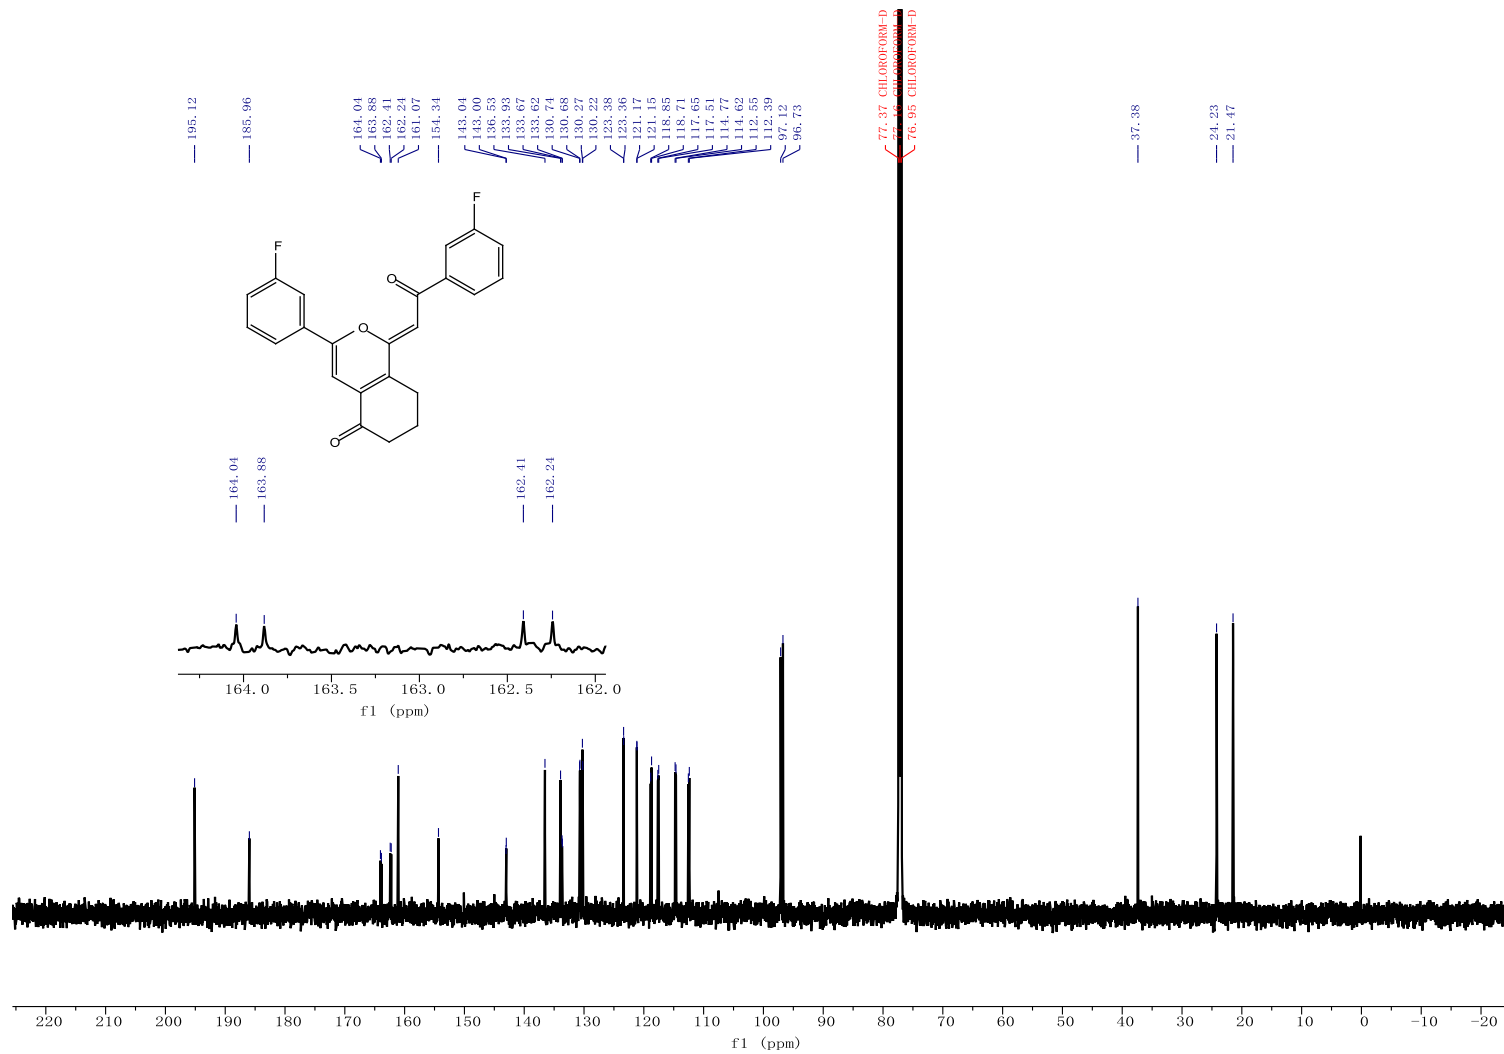

$^{19}\text{F}$  NMR (565 MHz,  $\text{CDCl}_3$ ) of **6k**

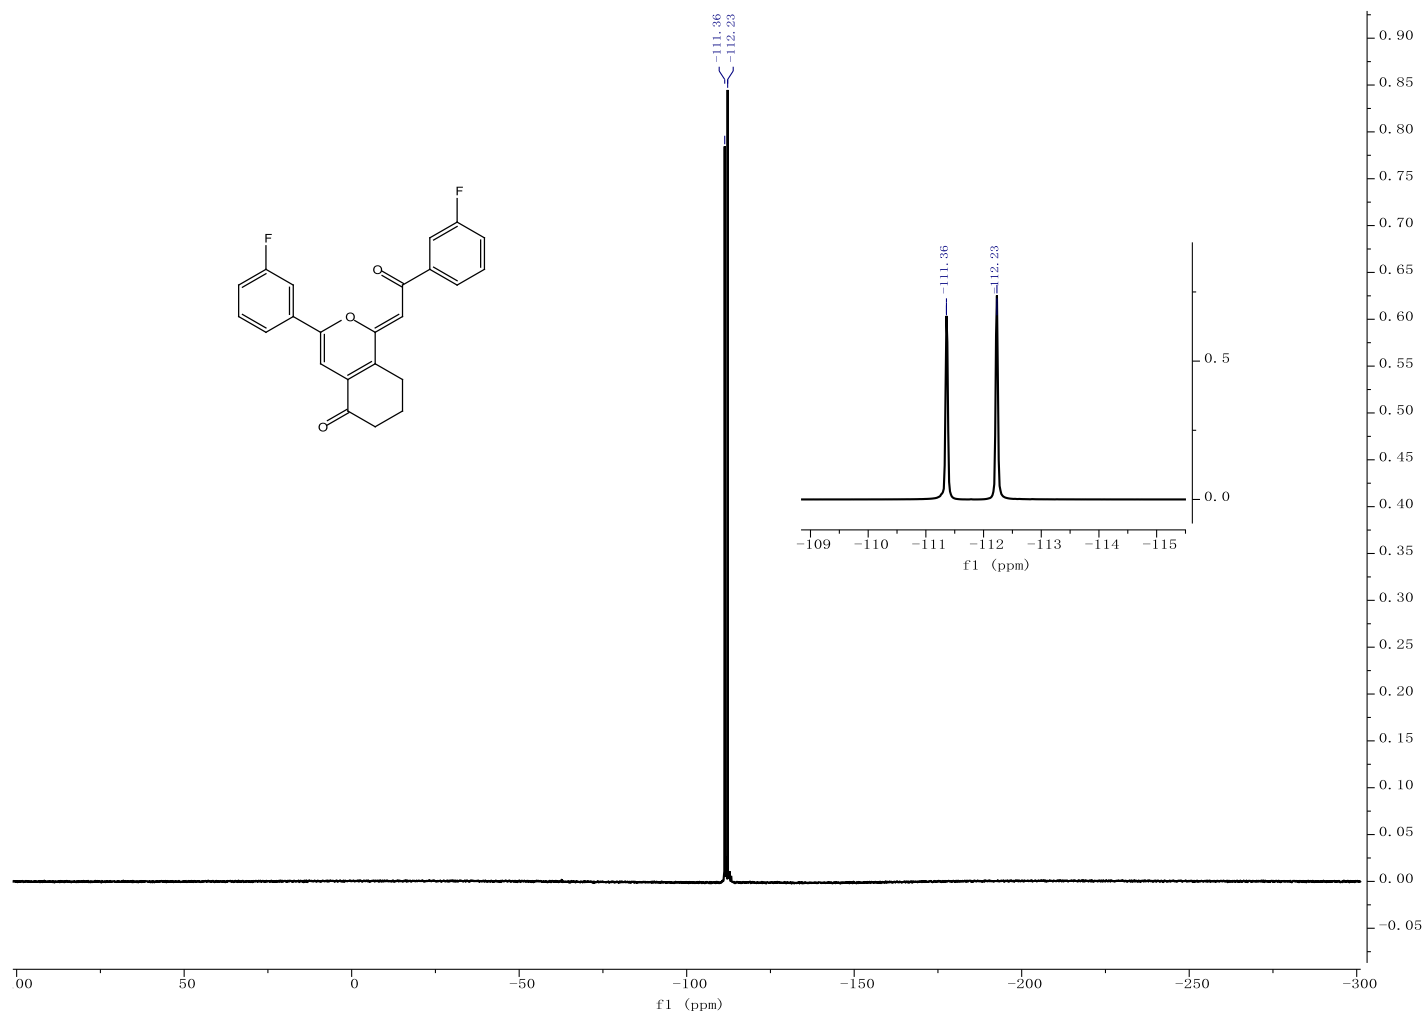

<sup>1</sup>H NMR (600 MHz, CDCl<sub>3</sub>) of **6l**

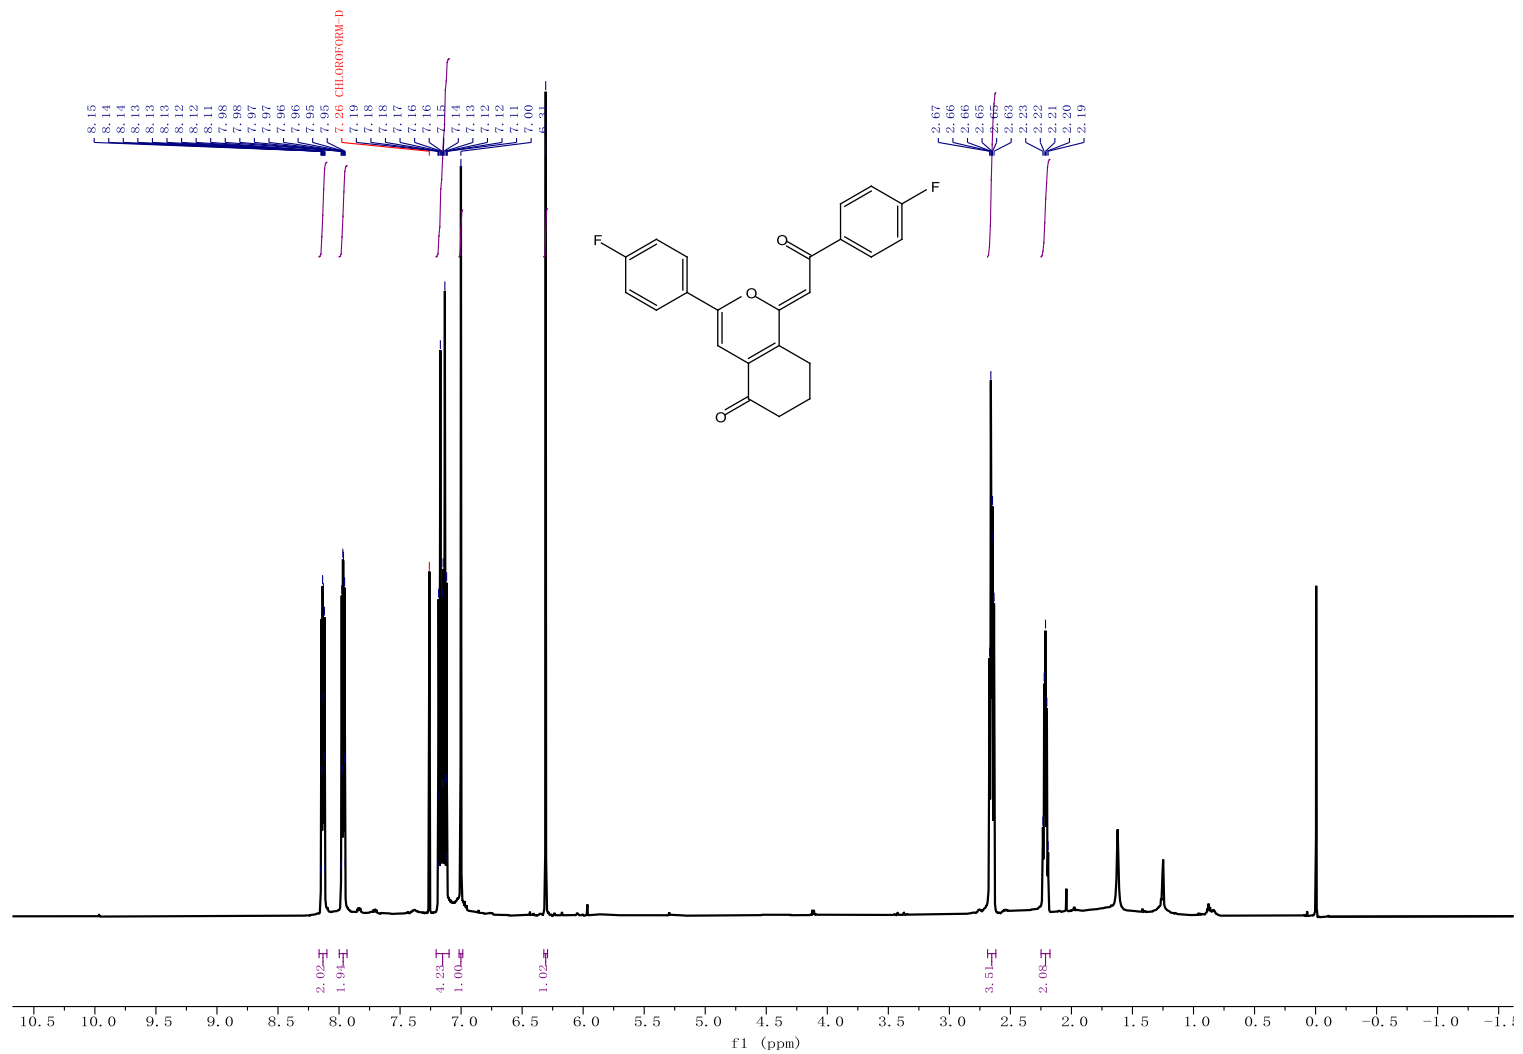

$^{13}\text{C}$  NMR (151 MHz,  $\text{CDCl}_3$ ) of **61**

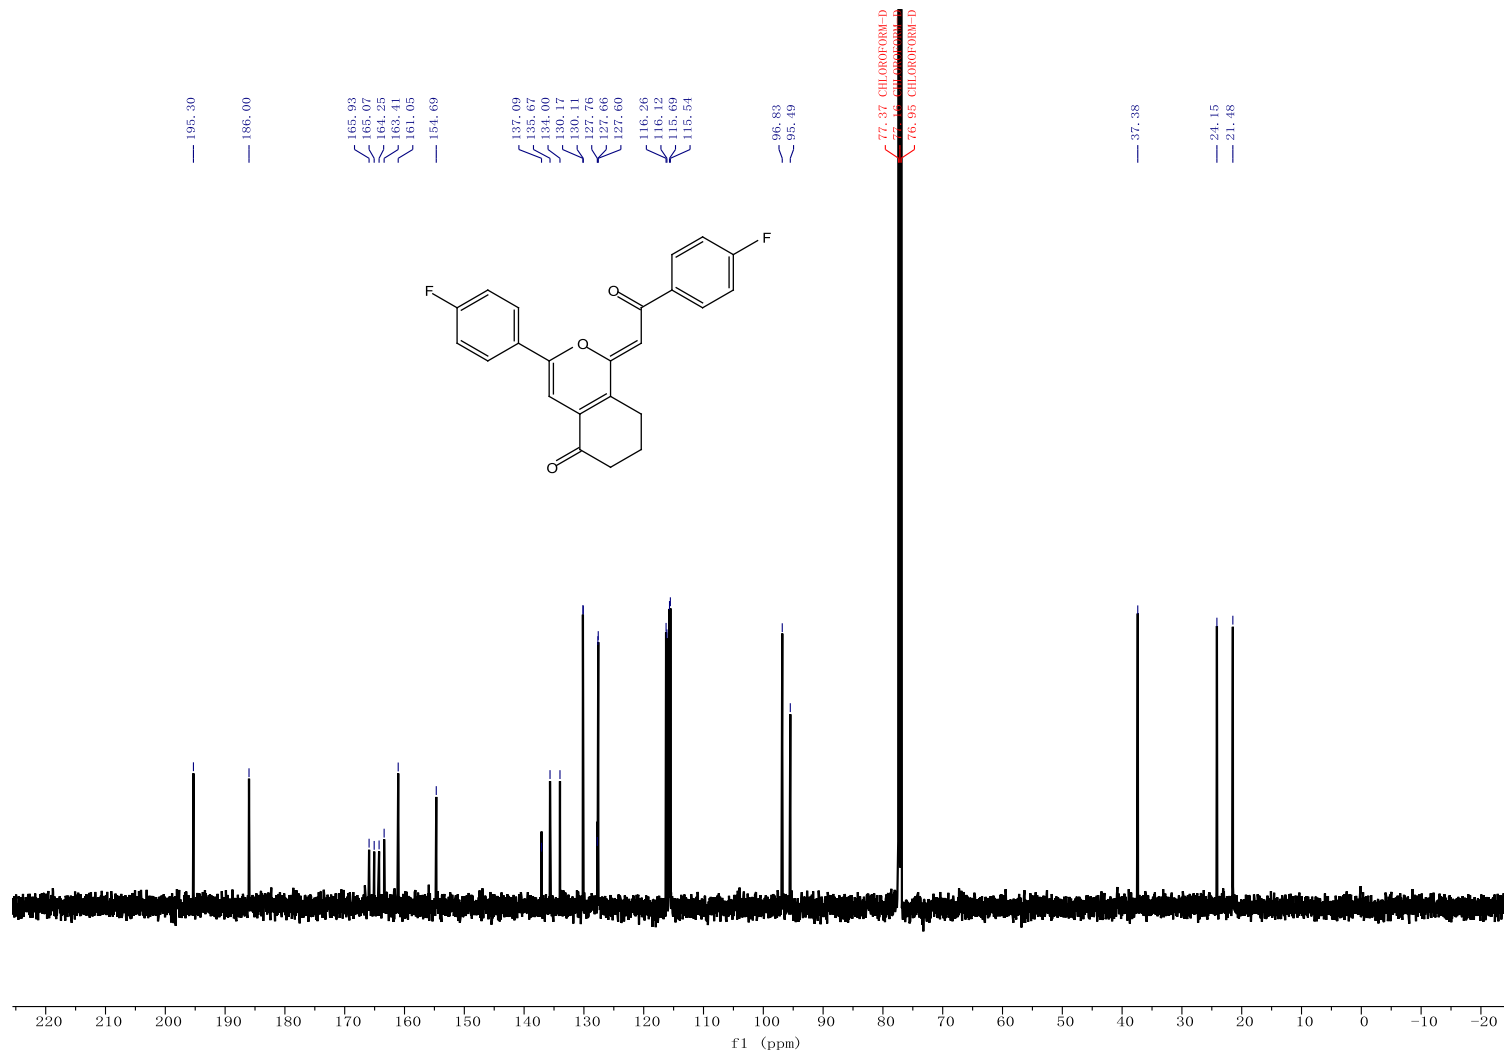

$^{19}\text{F}$  NMR (565 MHz,  $\text{CDCl}_3$ ) of **61**

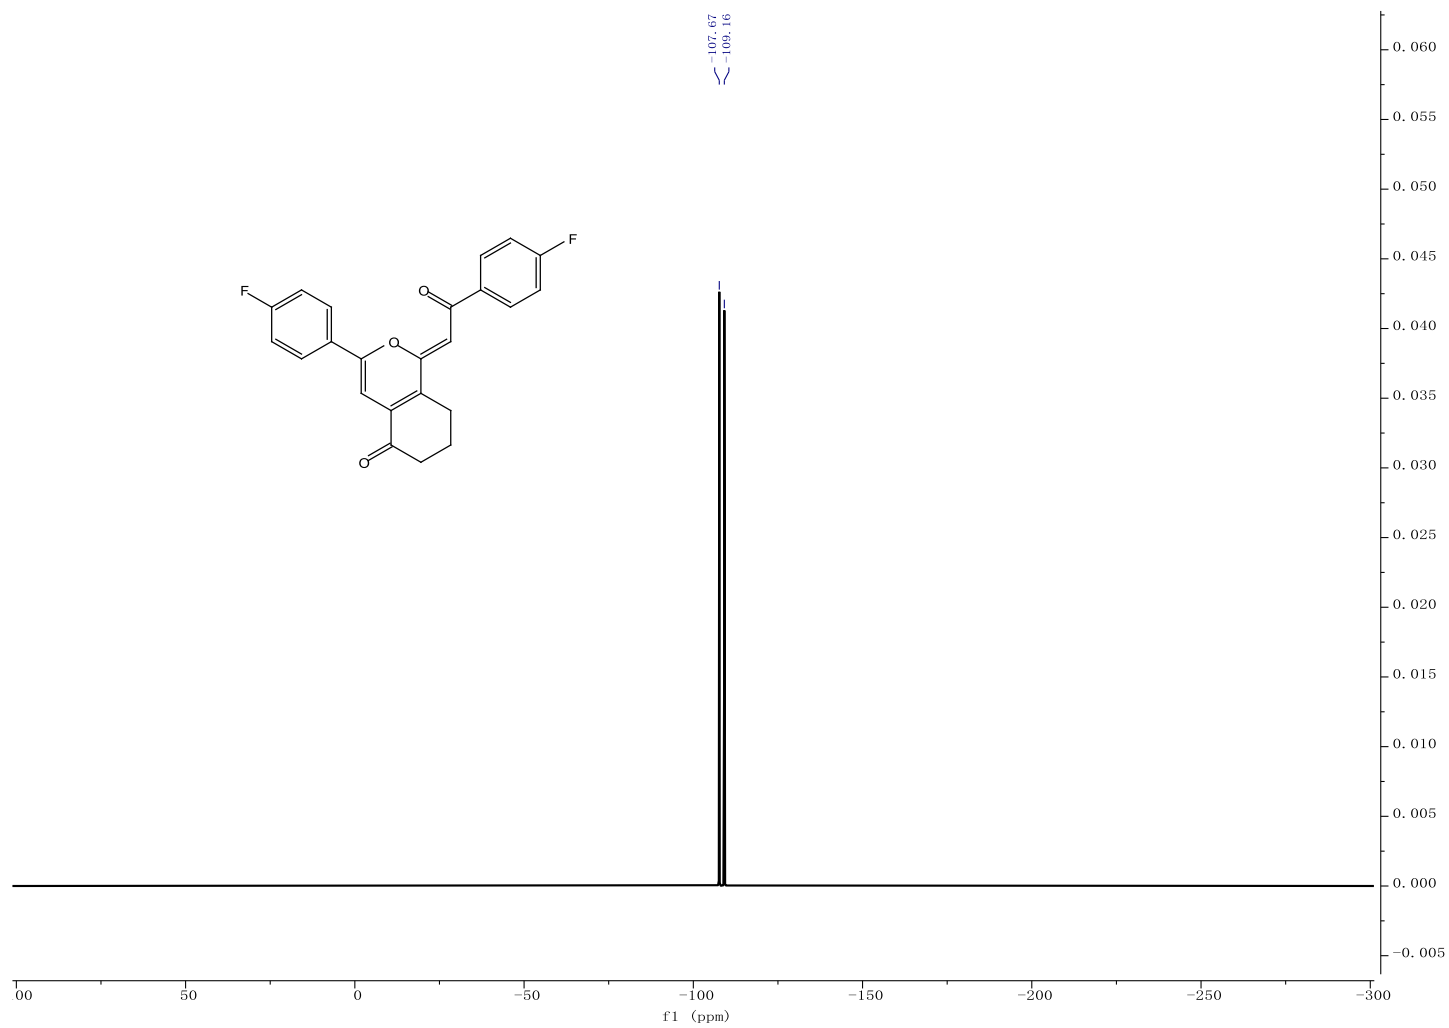

S206

$^1\text{H}$  NMR (600 MHz,  $\text{CD}_2\text{Cl}_2$ ) of **6m**

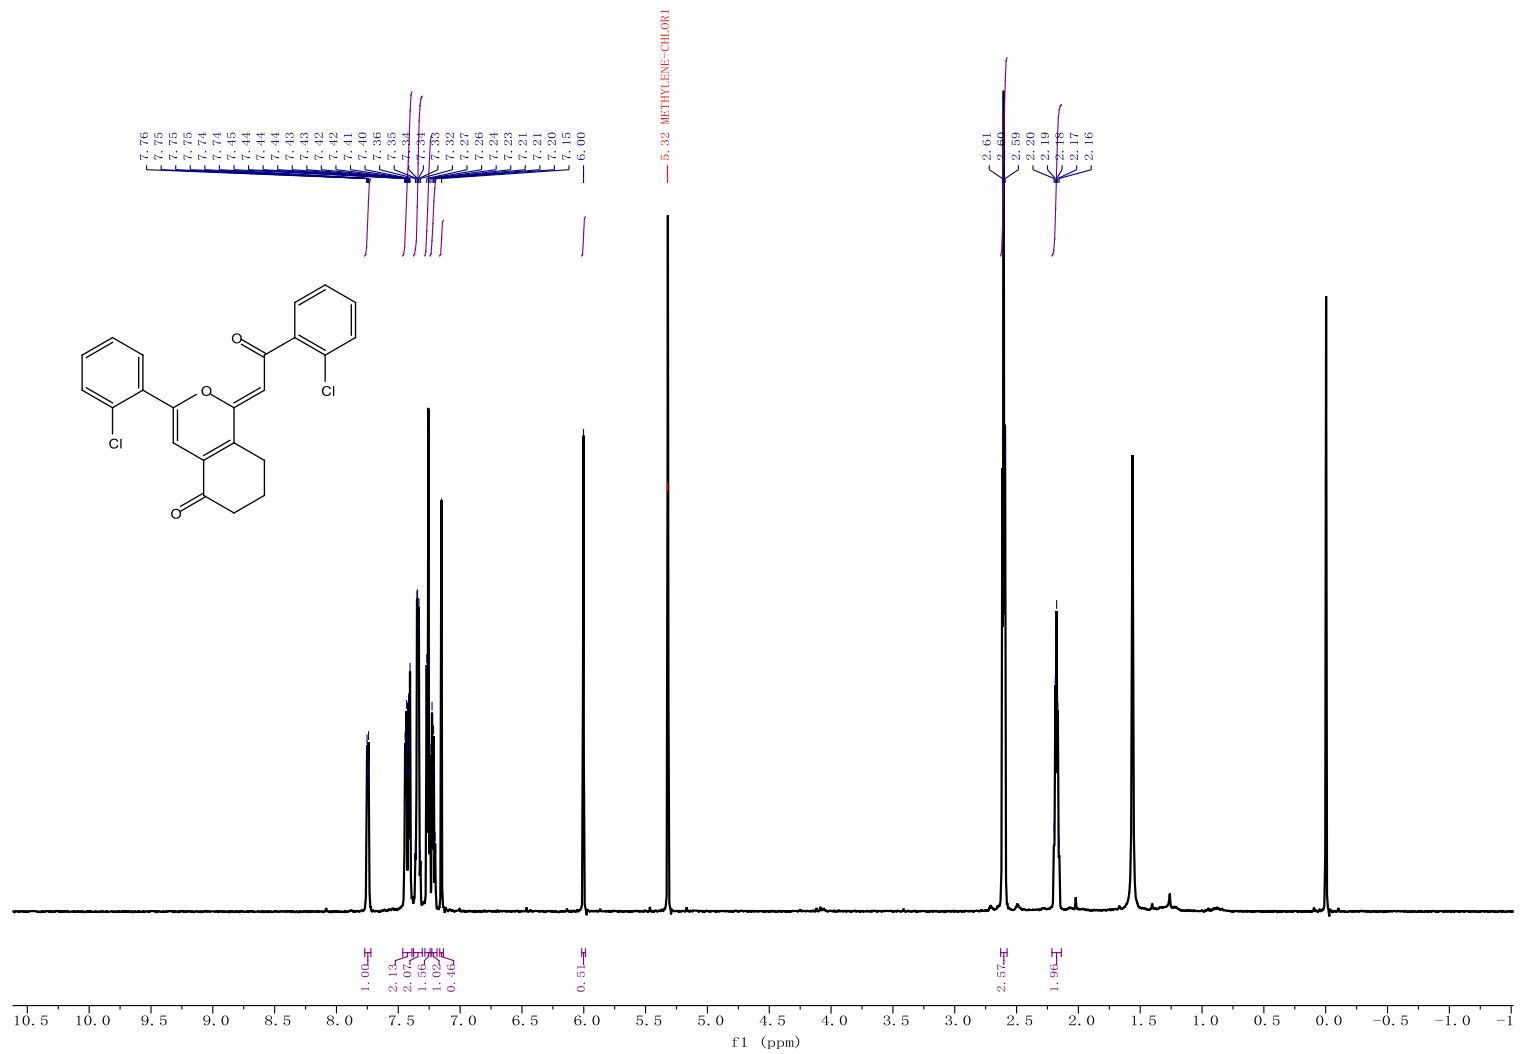

$^{13}\text{C}$  NMR (151 MHz,  $\text{CD}_2\text{Cl}_2$ ) of **6m**

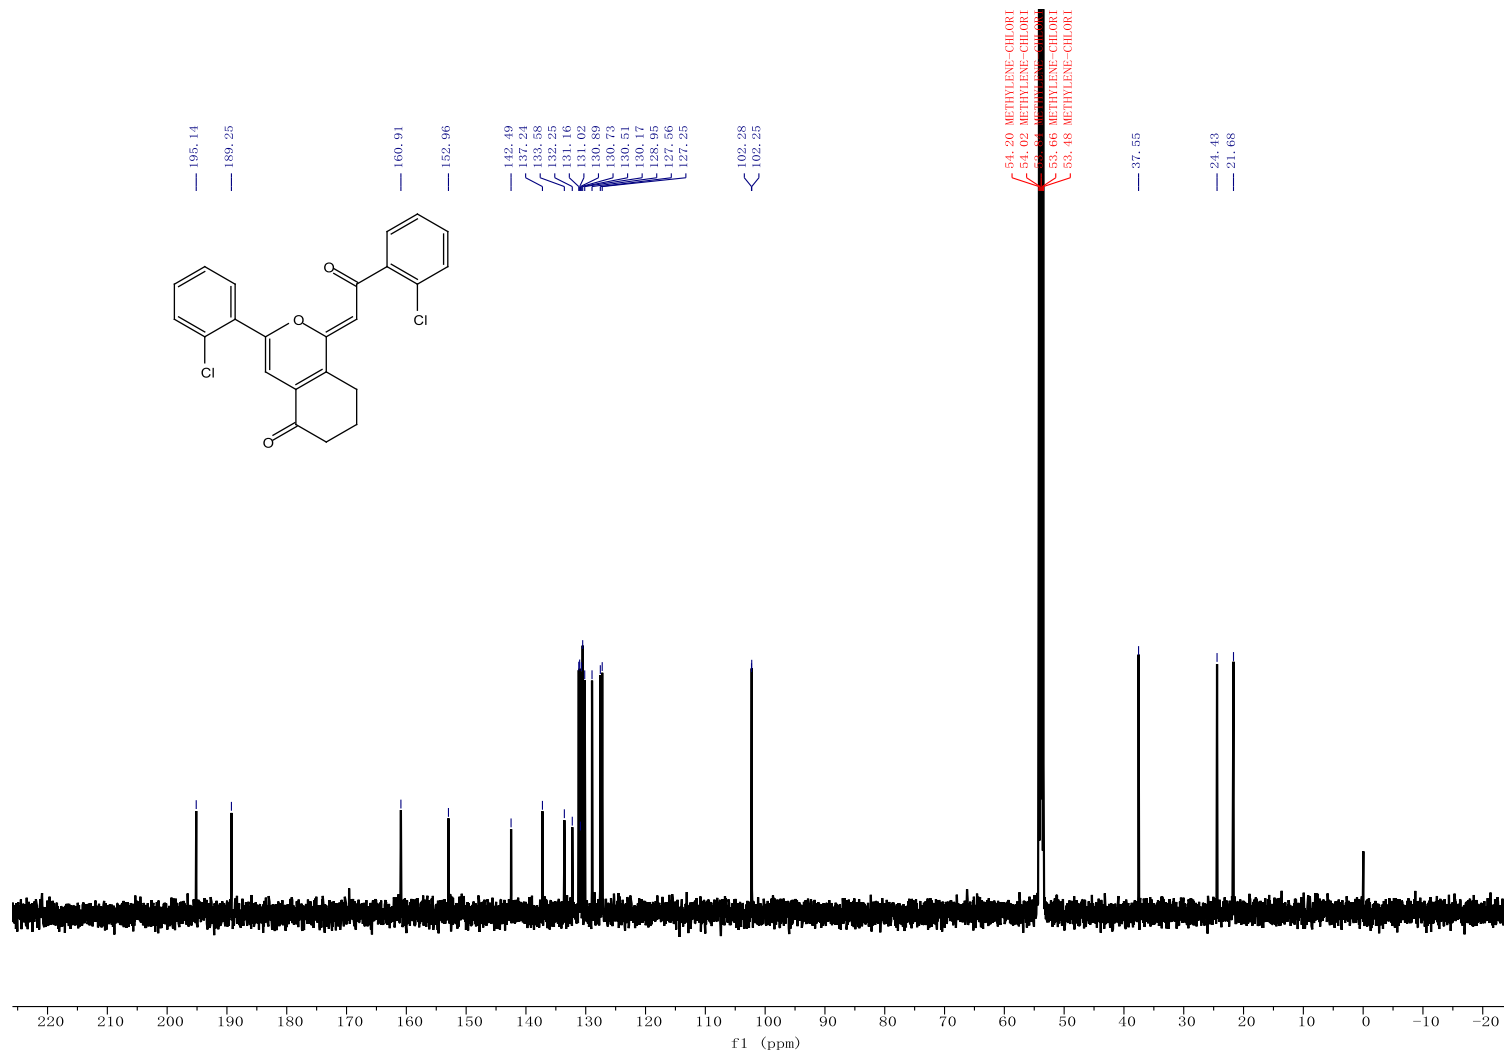



<sup>1</sup>H NMR (600 MHz, CDCl<sub>3</sub>) of **6n**

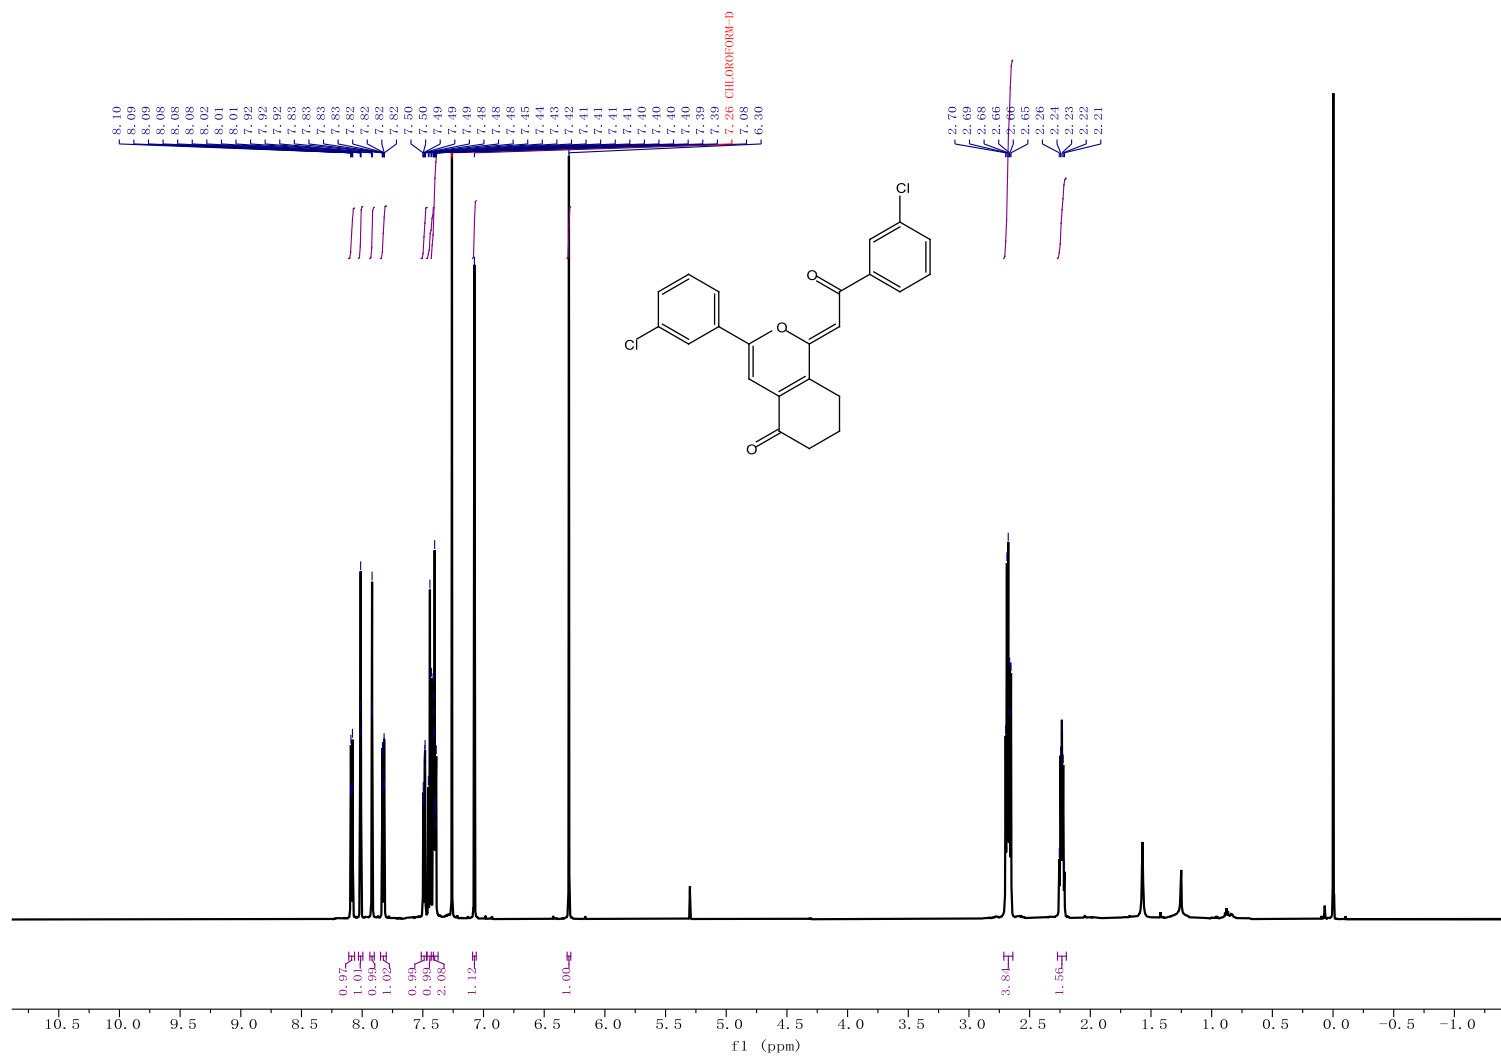

$^{13}\text{C}$  NMR (151 MHz,  $\text{CDCl}_3$ ) of **6n**

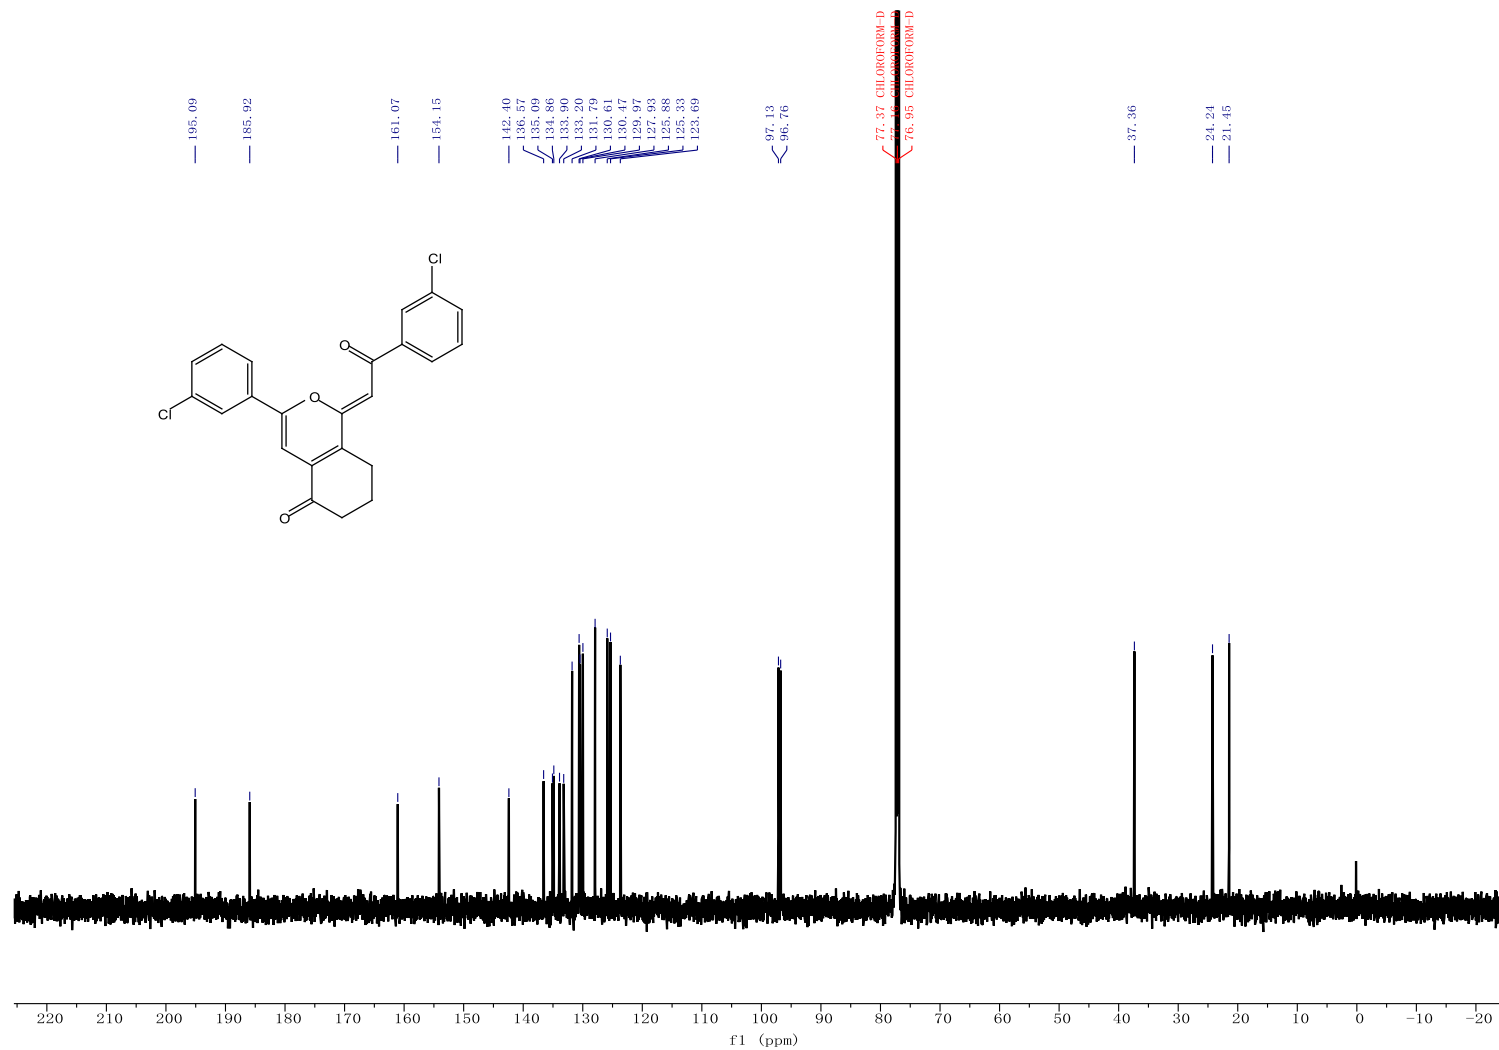

$^1\text{H}$  NMR (600 MHz,  $\text{CDCl}_3$ ) of **60**

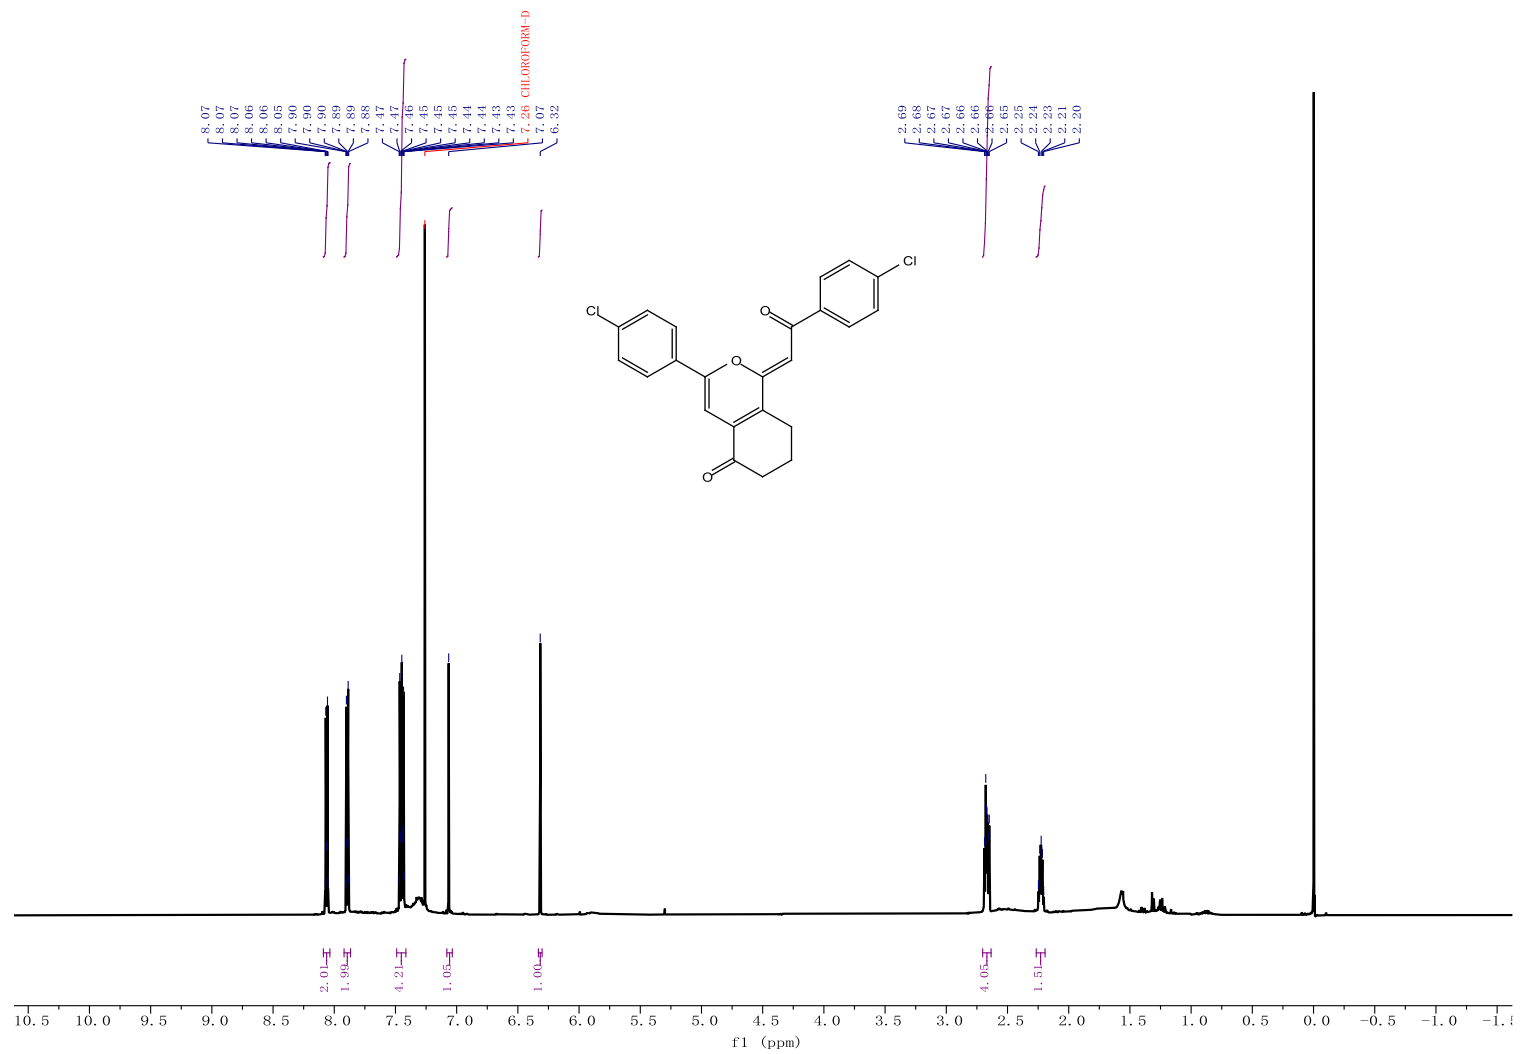

<sup>13</sup>C NMR (151 MHz, CDCl<sub>3</sub>) of **60**

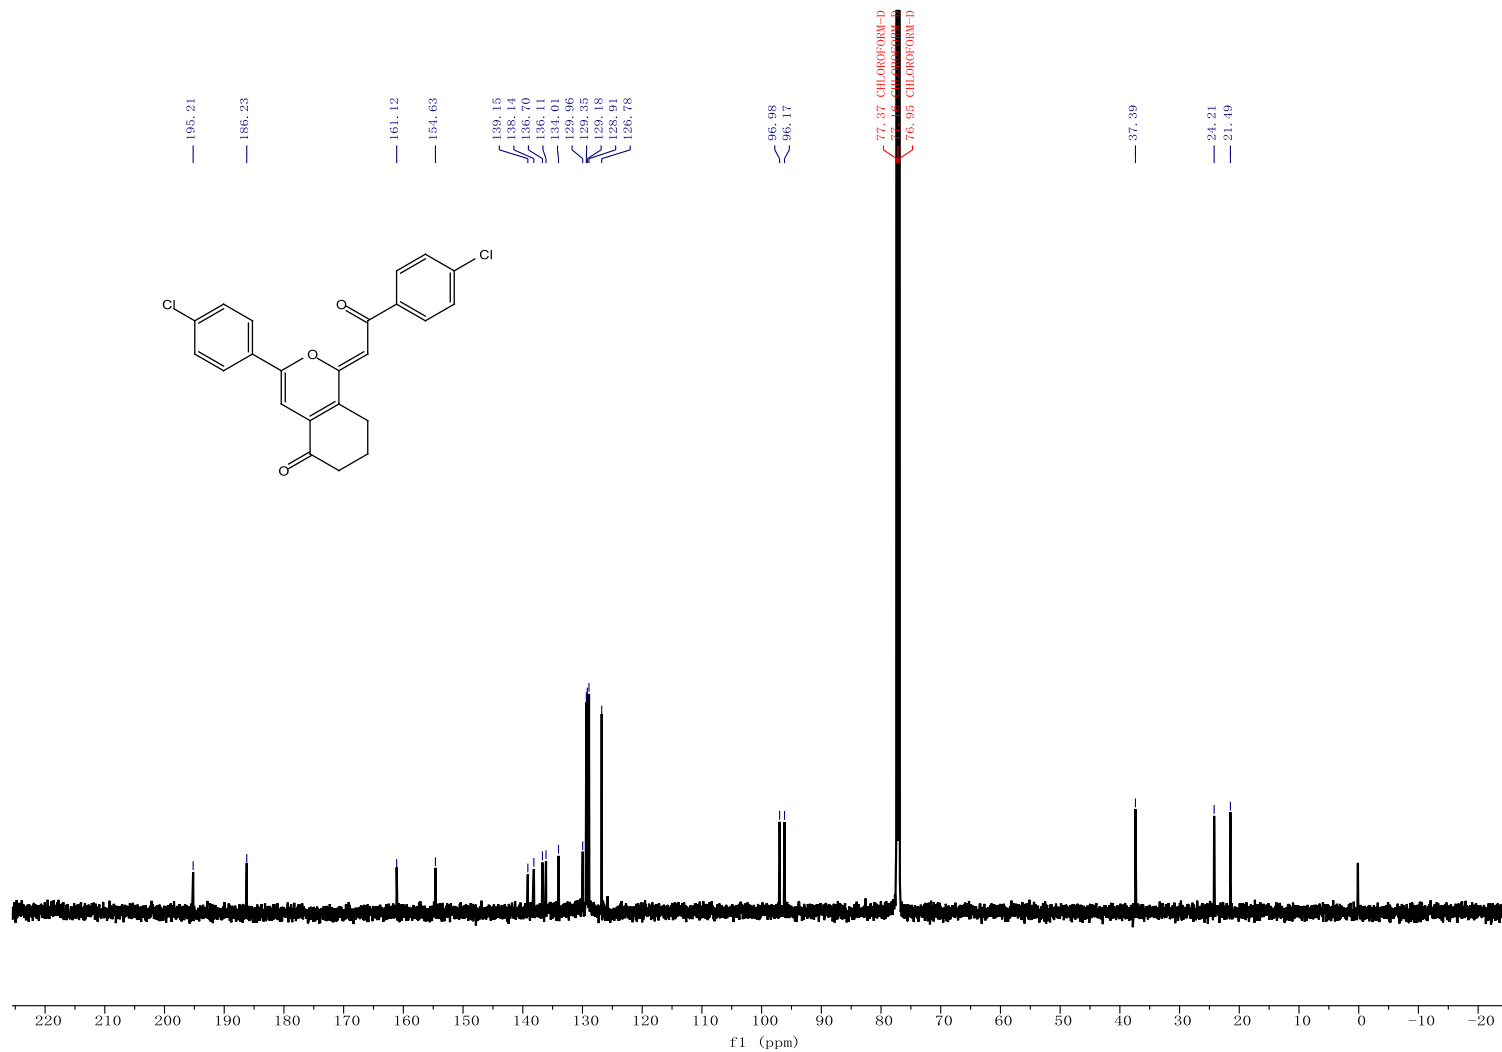

<sup>1</sup>H NMR (600 MHz, CDCl<sub>3</sub>) of **6p**

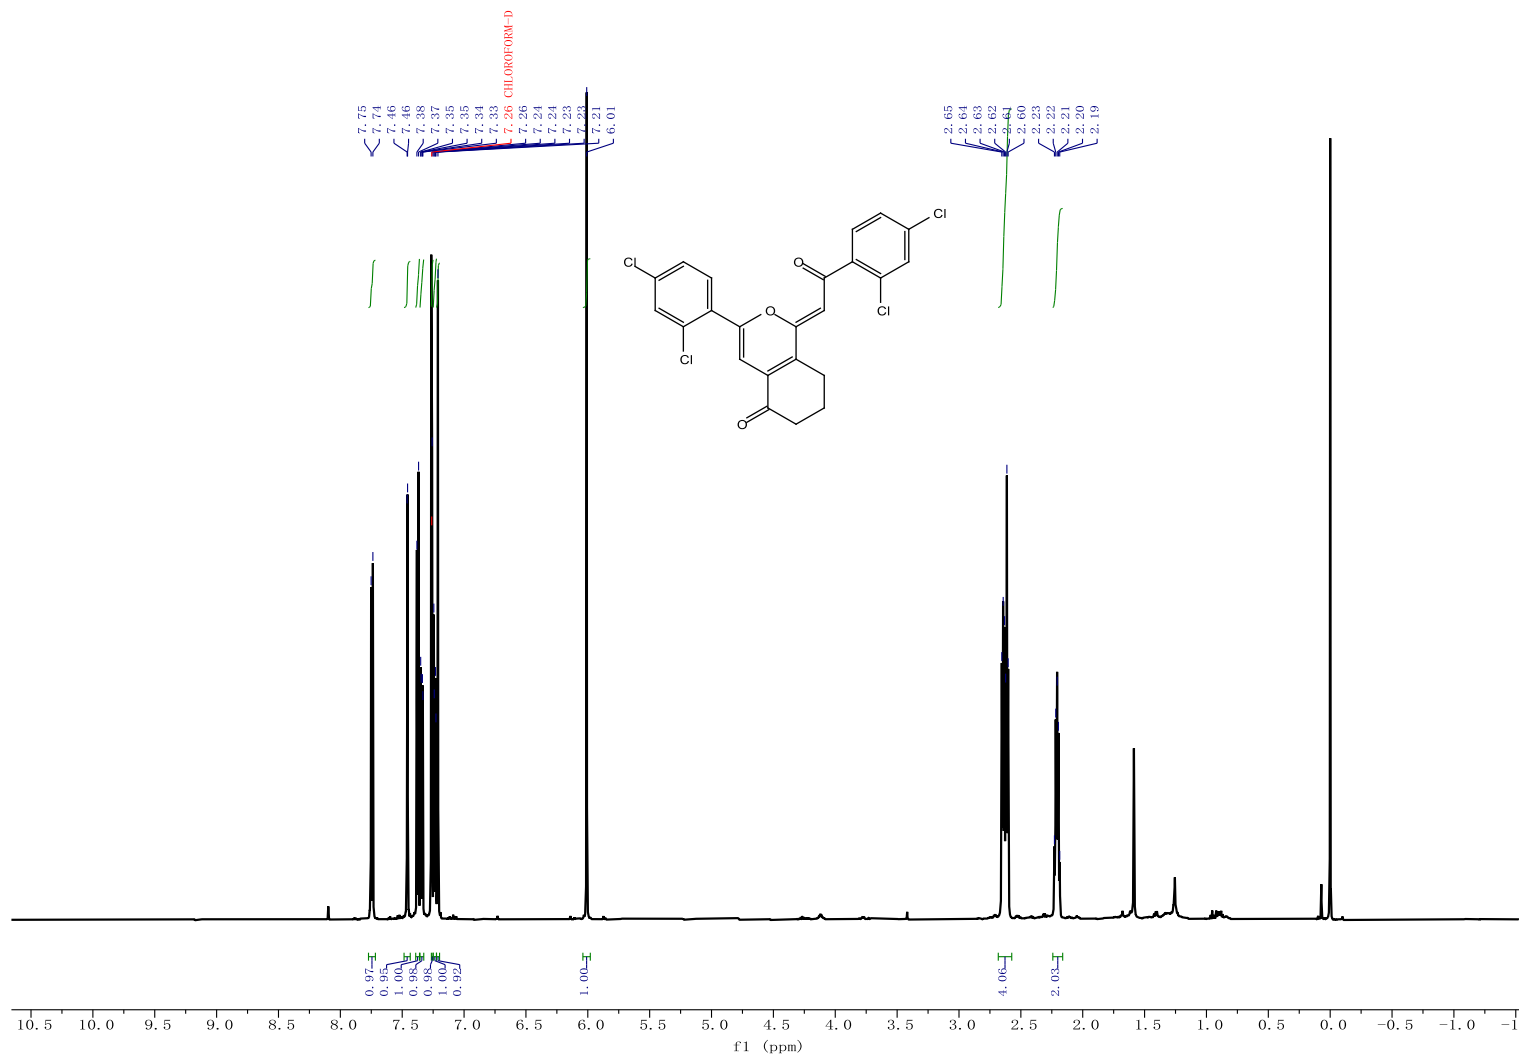

$^{13}\text{C}$  NMR (151 MHz,  $\text{CDCl}_3$ ) of **6p**

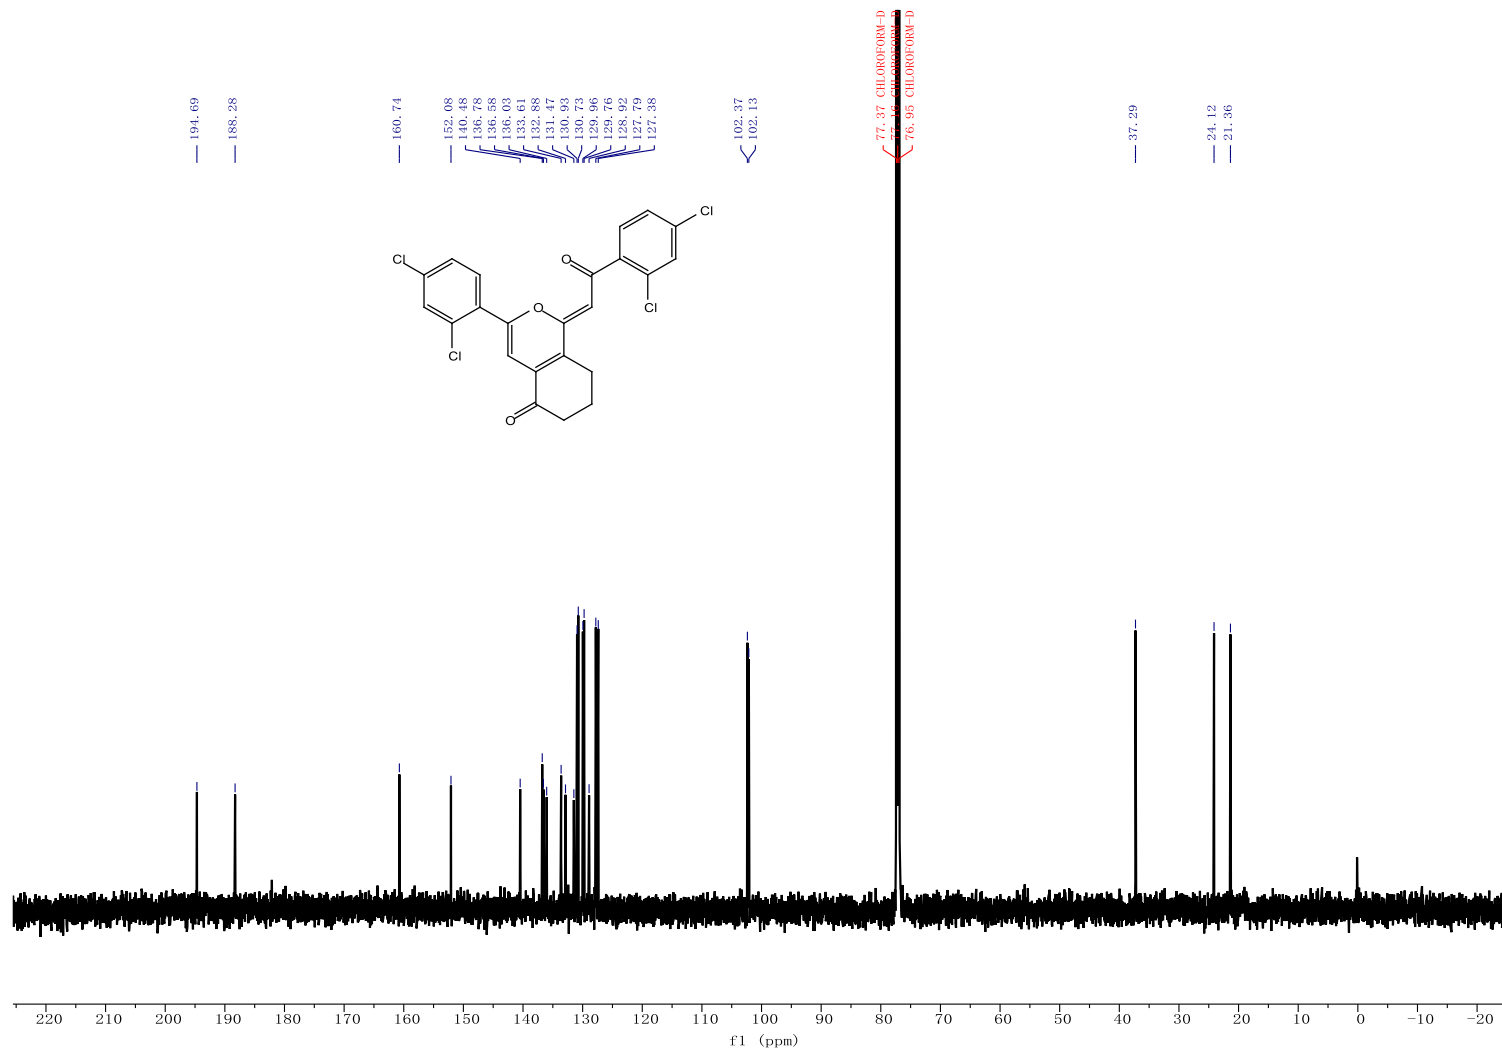

$^1\text{H}$  NMR (600 MHz,  $\text{CDCl}_3$ ) of **6q**

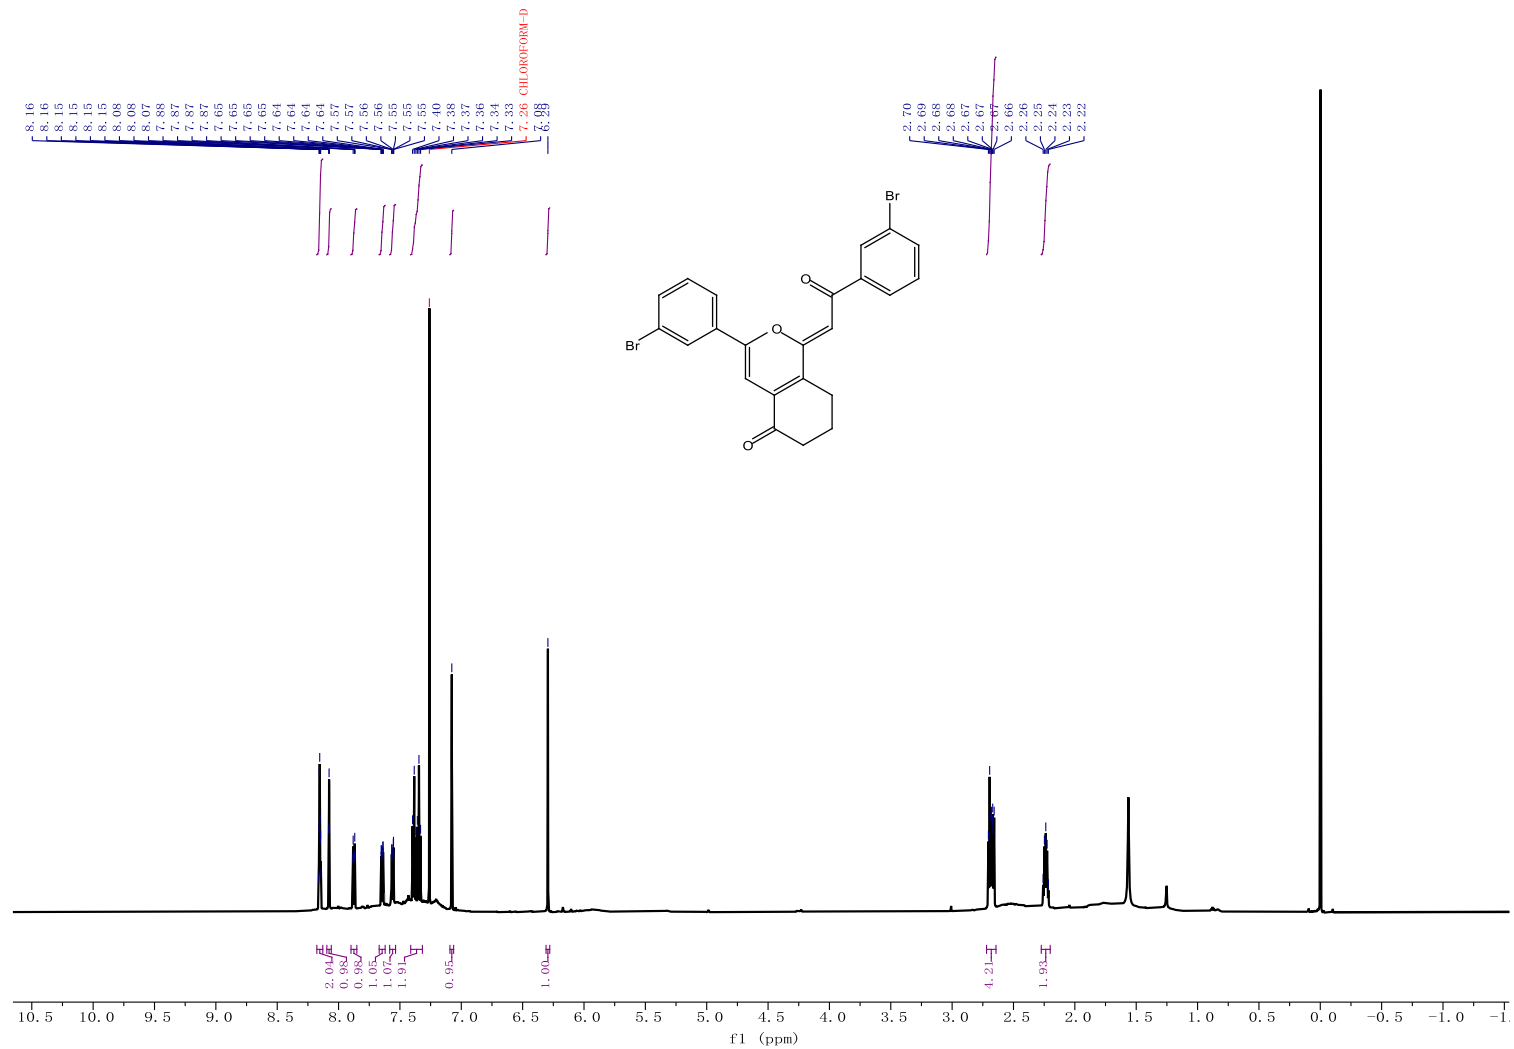

$^{13}\text{C}$  NMR (151 MHz,  $\text{CDCl}_3$ ) of **6q**

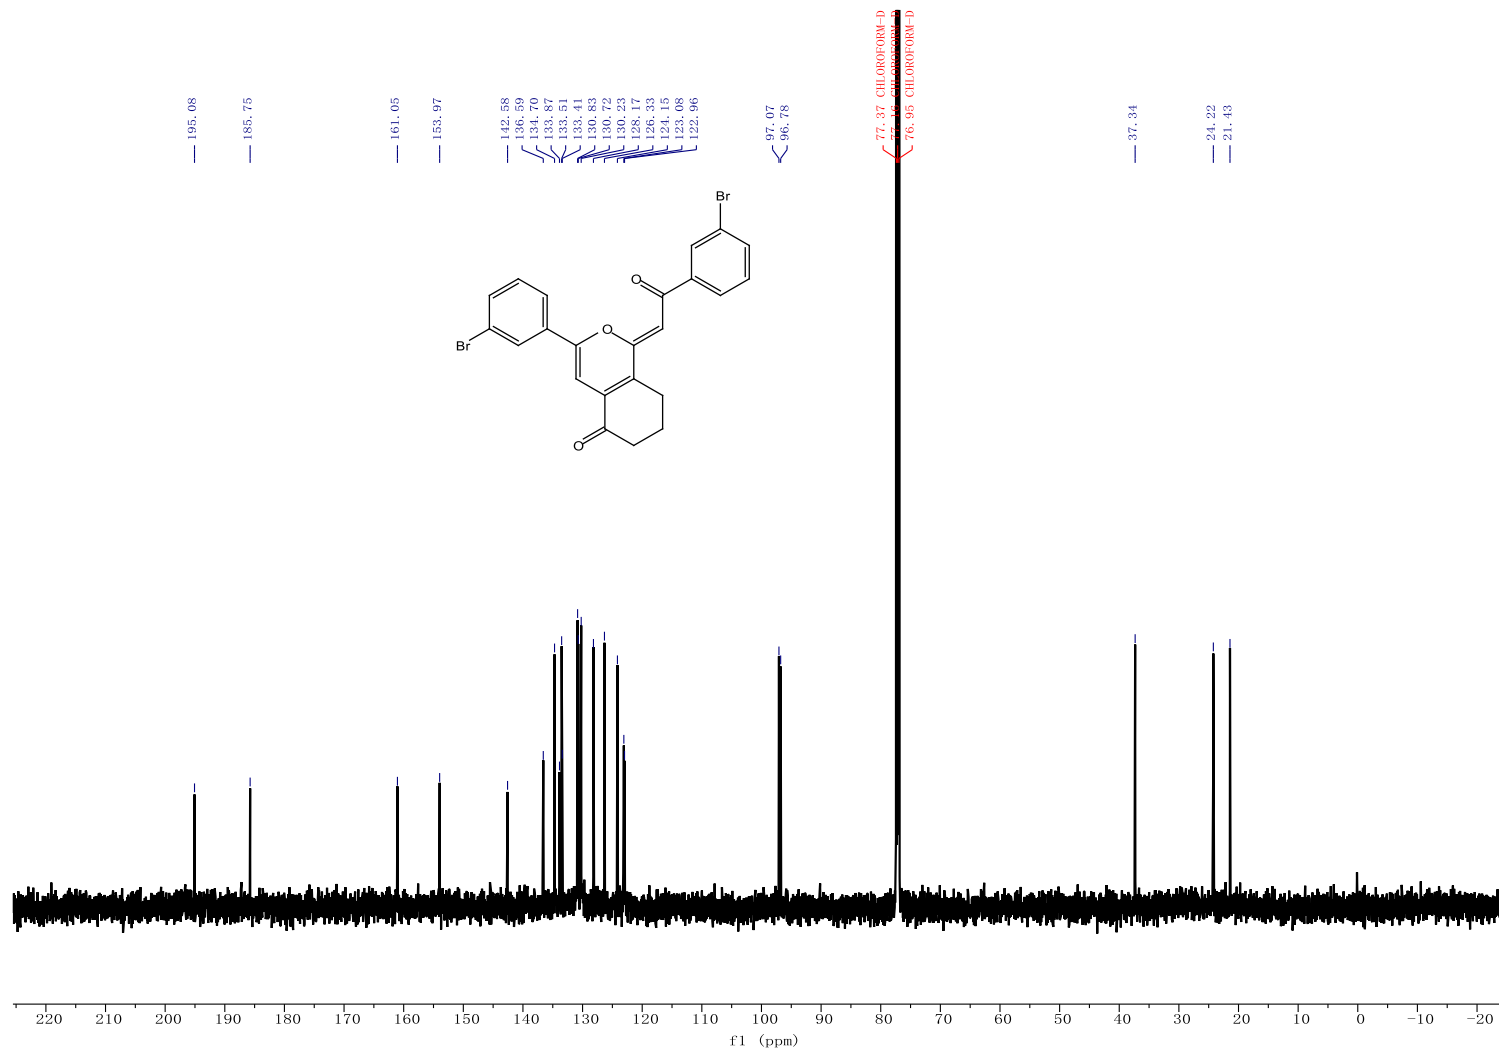



$^1\text{H}$  NMR (600 MHz,  $\text{CDCl}_3$ ) of **6r**

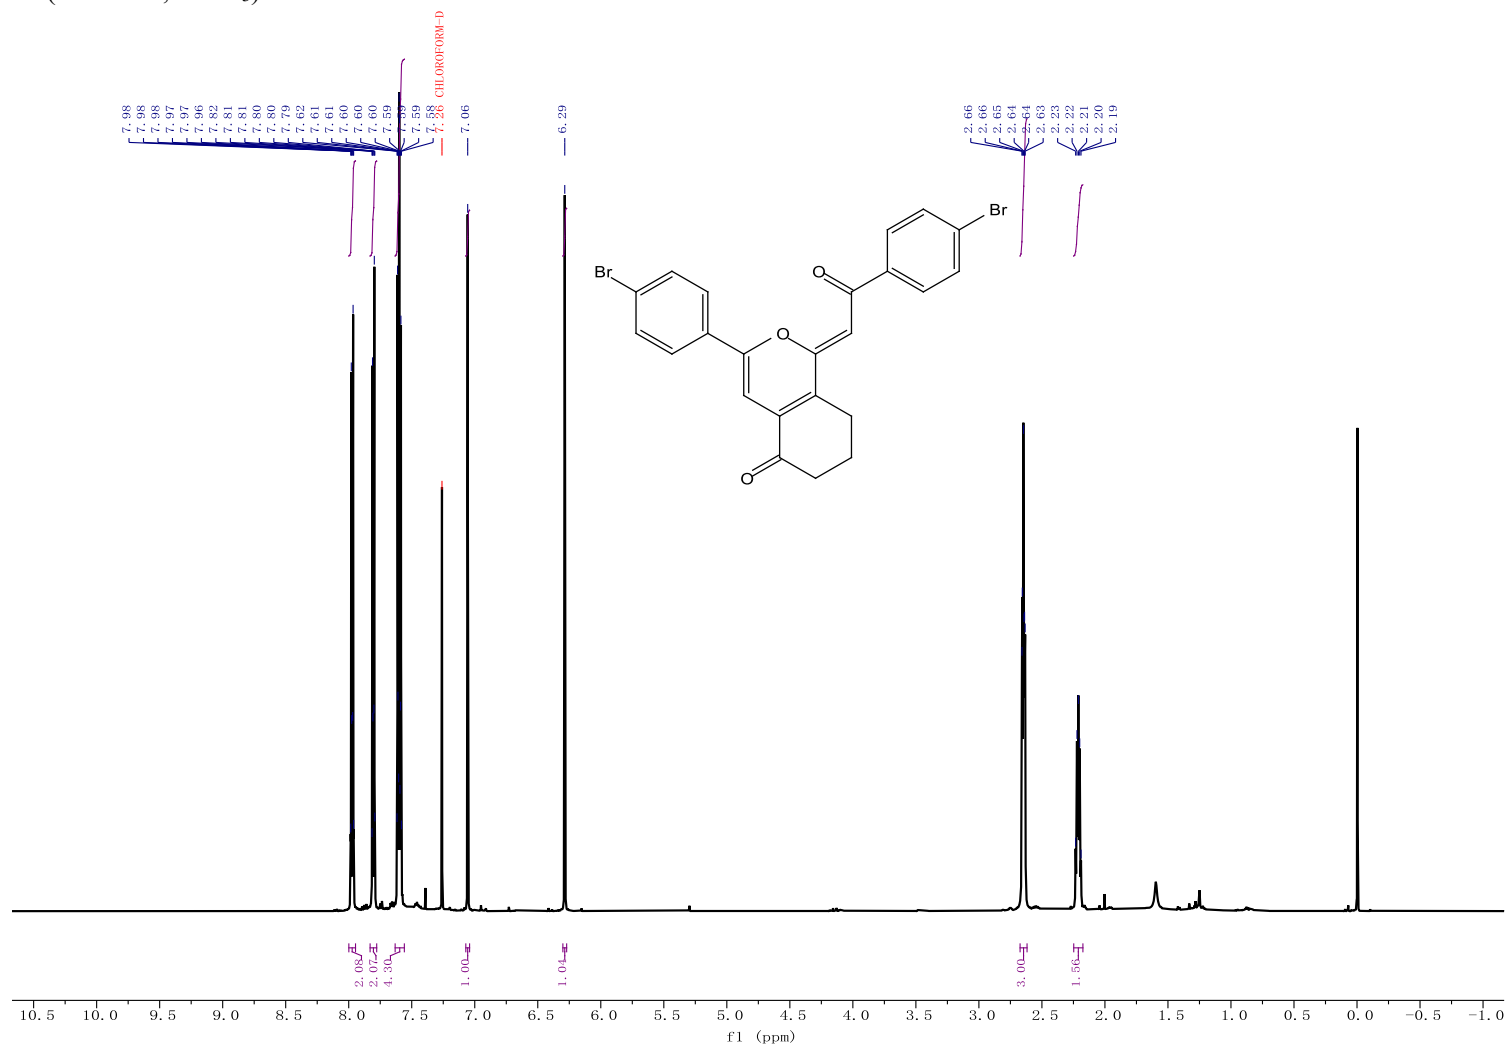

$^{13}\text{C}$  NMR (151 MHz,  $\text{CDCl}_3$ ) of **6r**

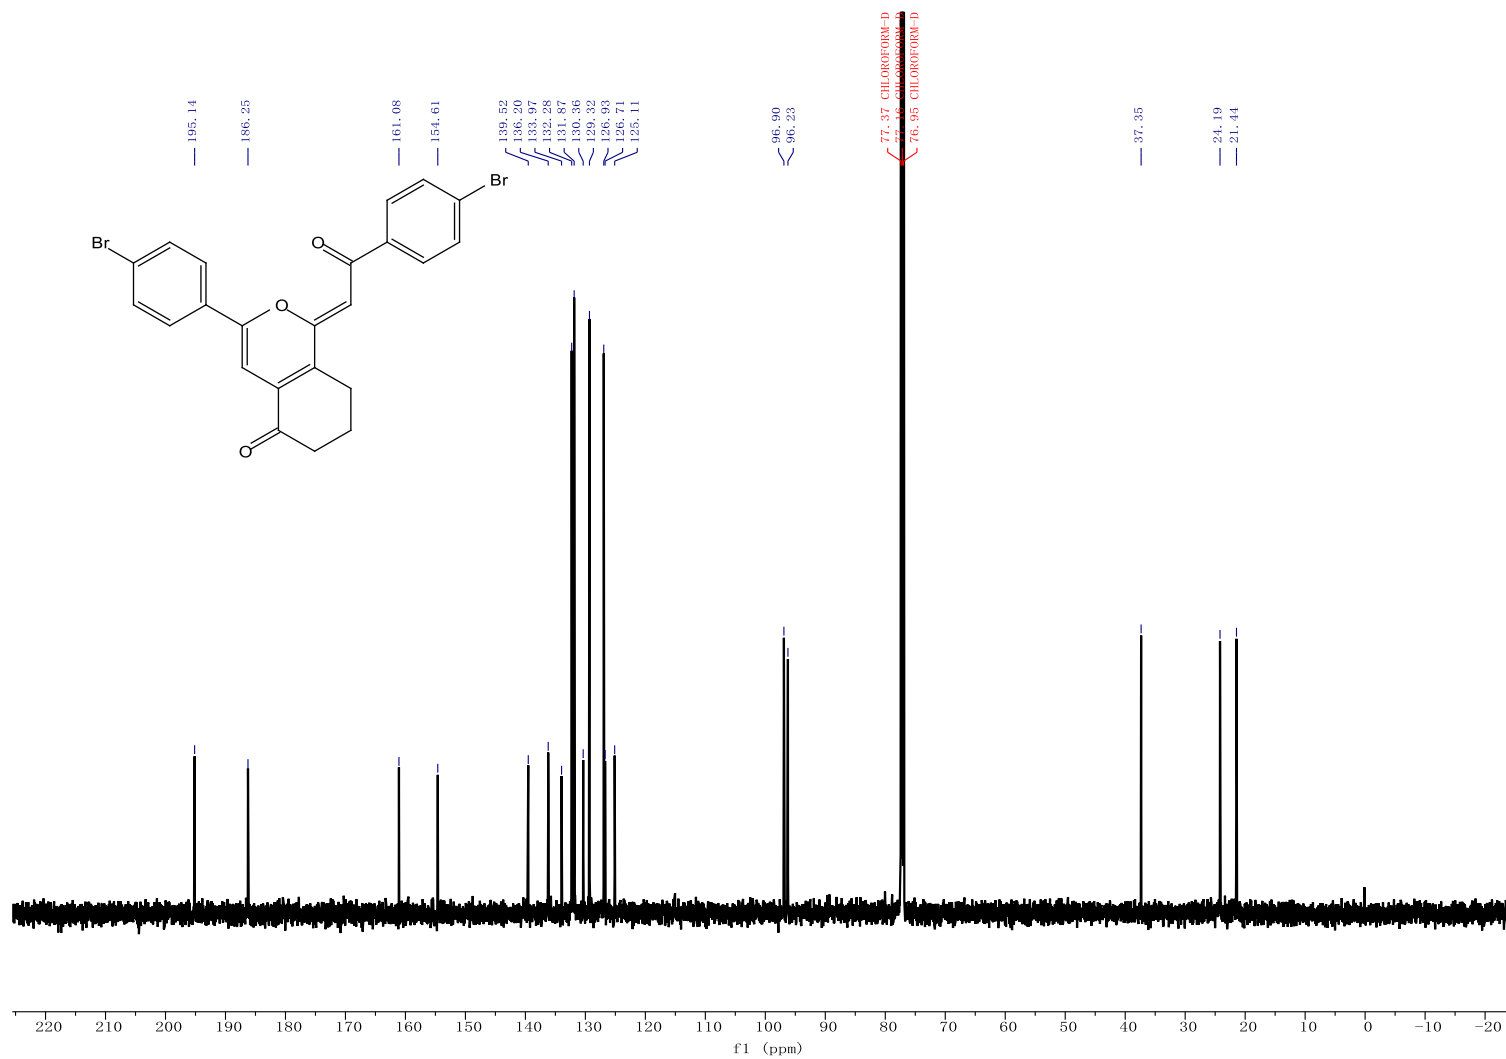

$^1\text{H}$  NMR (600 MHz,  $\text{CDCl}_3$ ) of **6s**

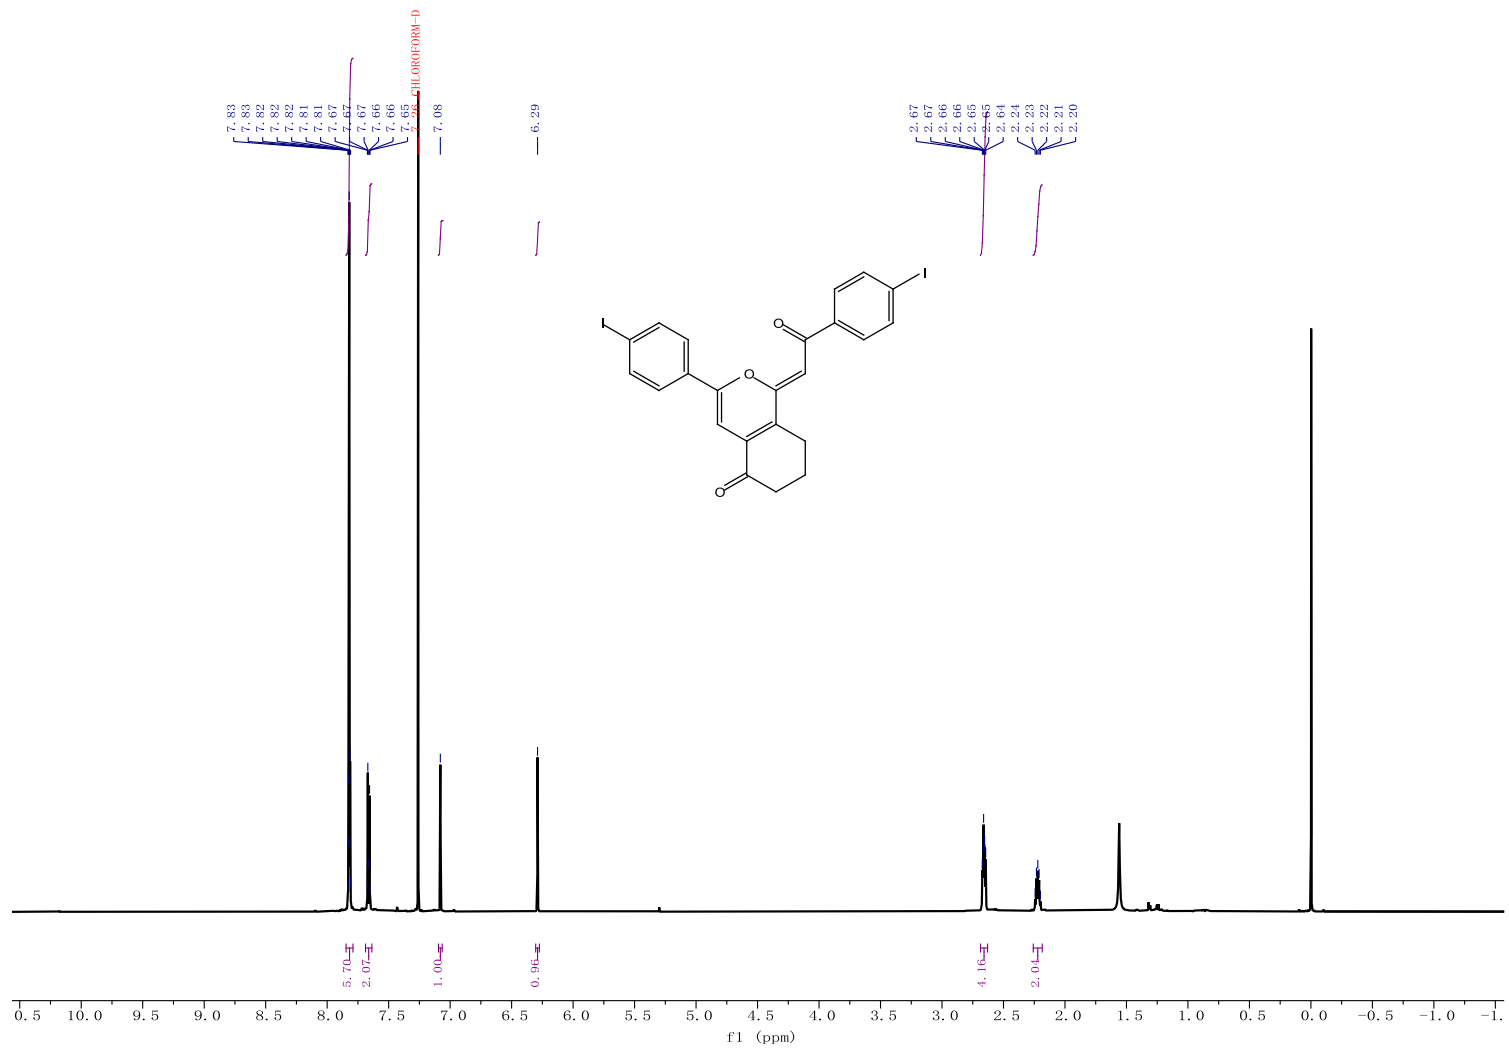

$^{13}\text{C}$  NMR (101 MHz,  $\text{CDCl}_3$ ) of **6s**

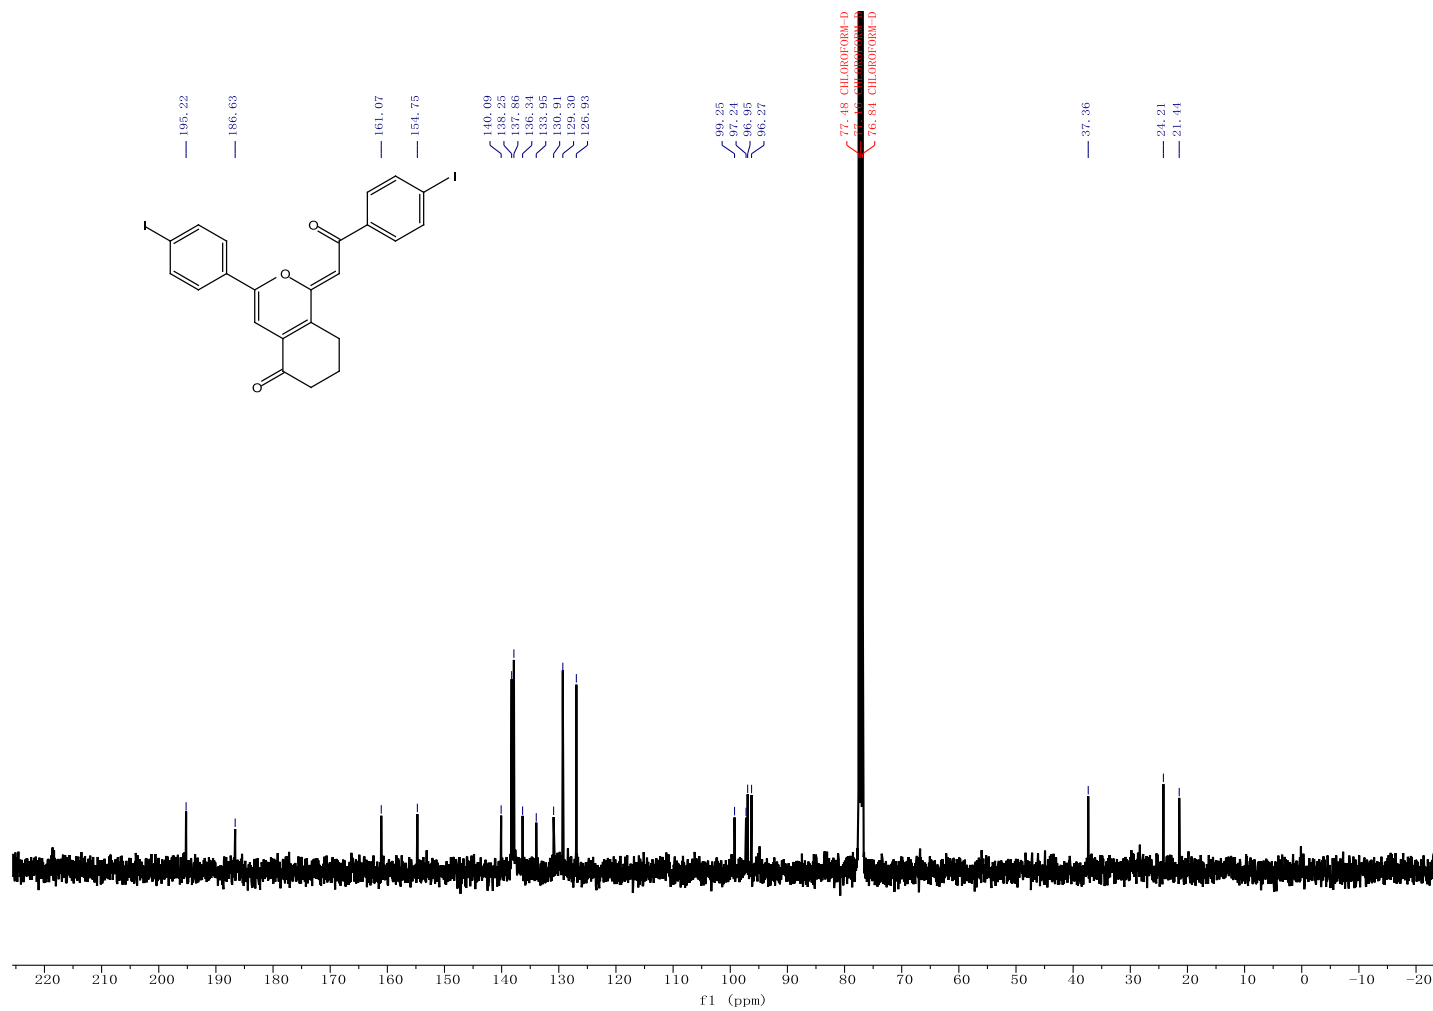

<sup>1</sup>H NMR (600 MHz, CDCl<sub>3</sub>) of **6t**

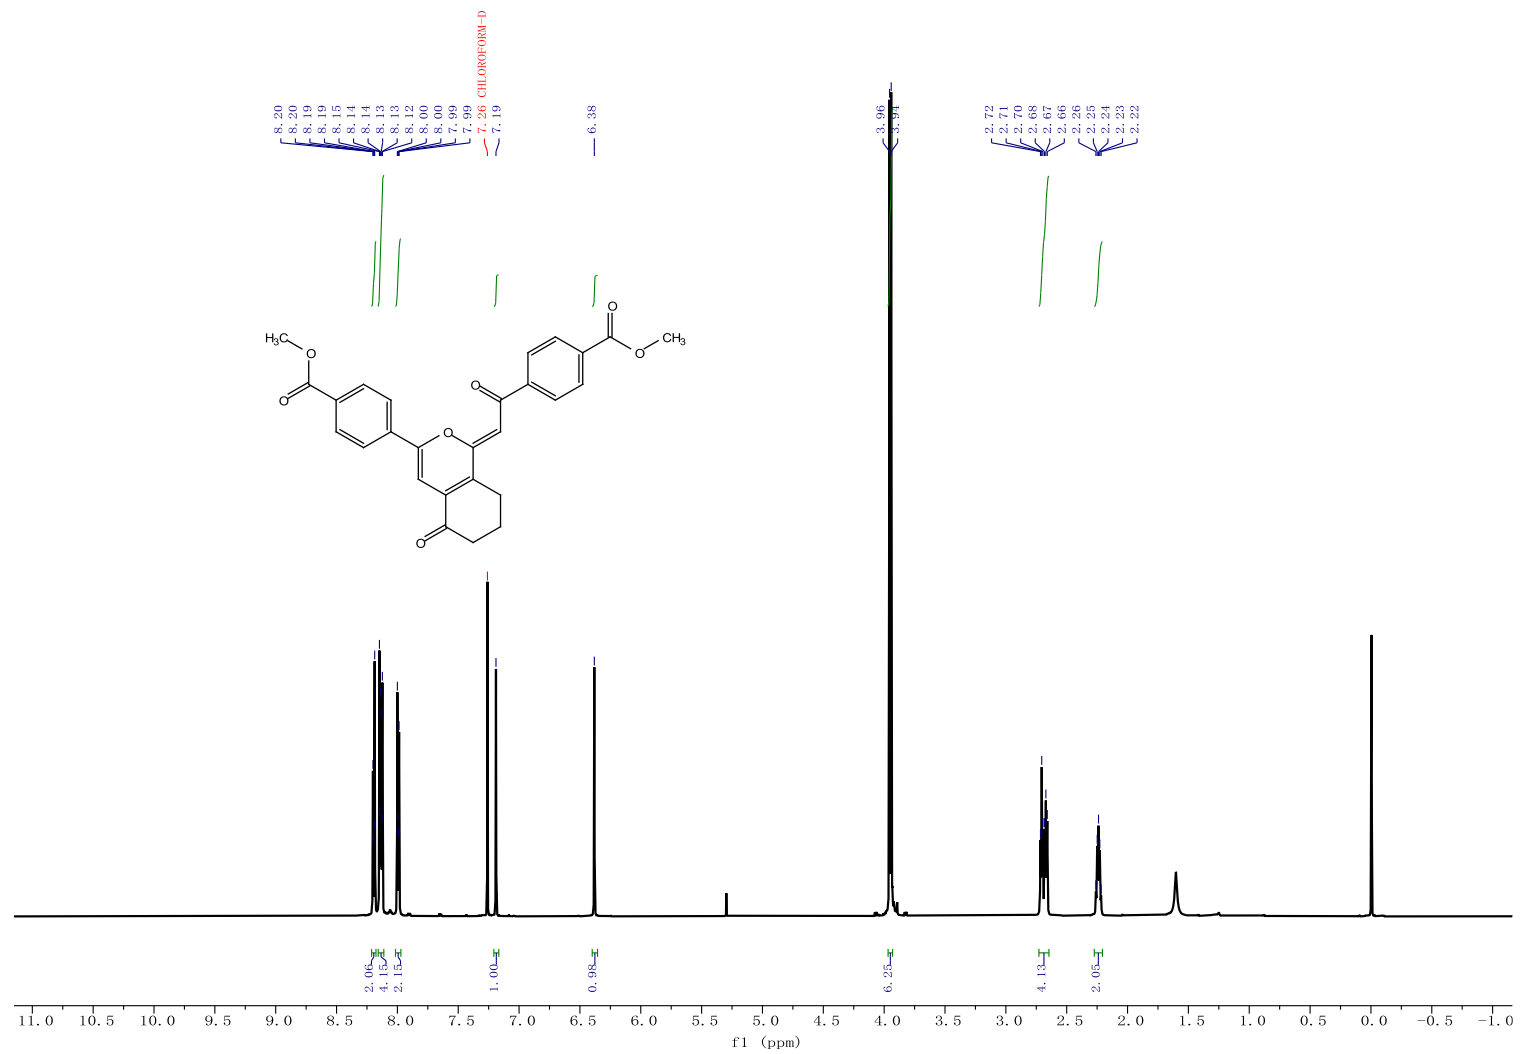

$^{13}\text{C}$  NMR (151 MHz,  $\text{CDCl}_3$ ) of **6t**

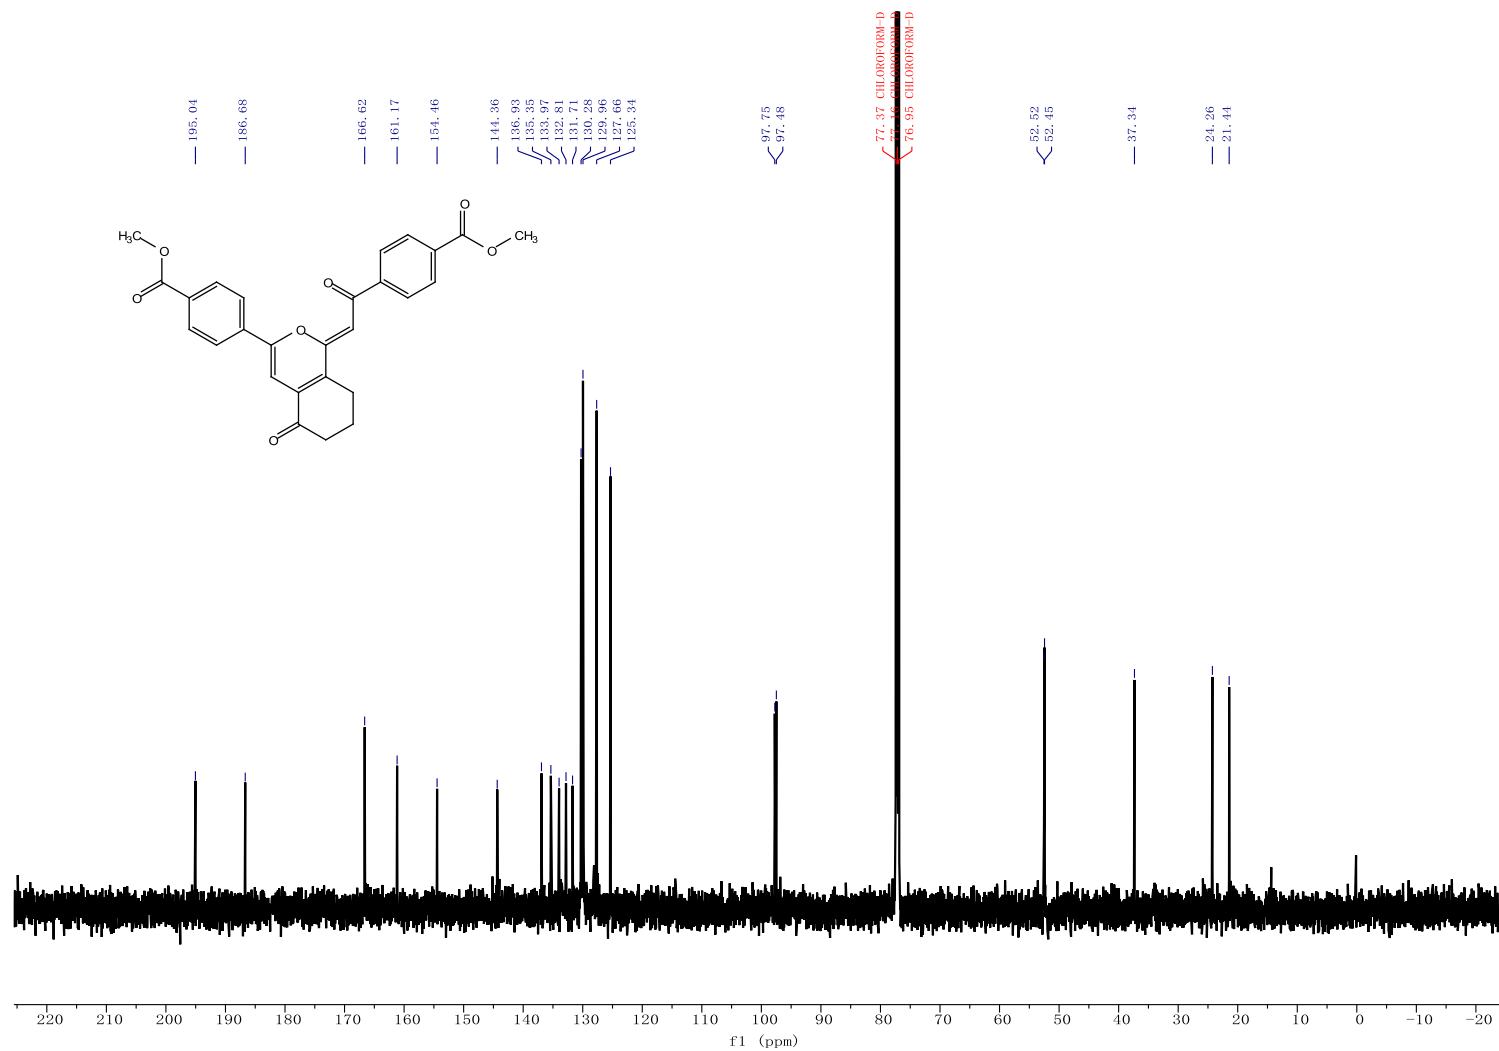

<sup>1</sup>H NMR (600 MHz, CDCl<sub>3</sub>) of **6u**

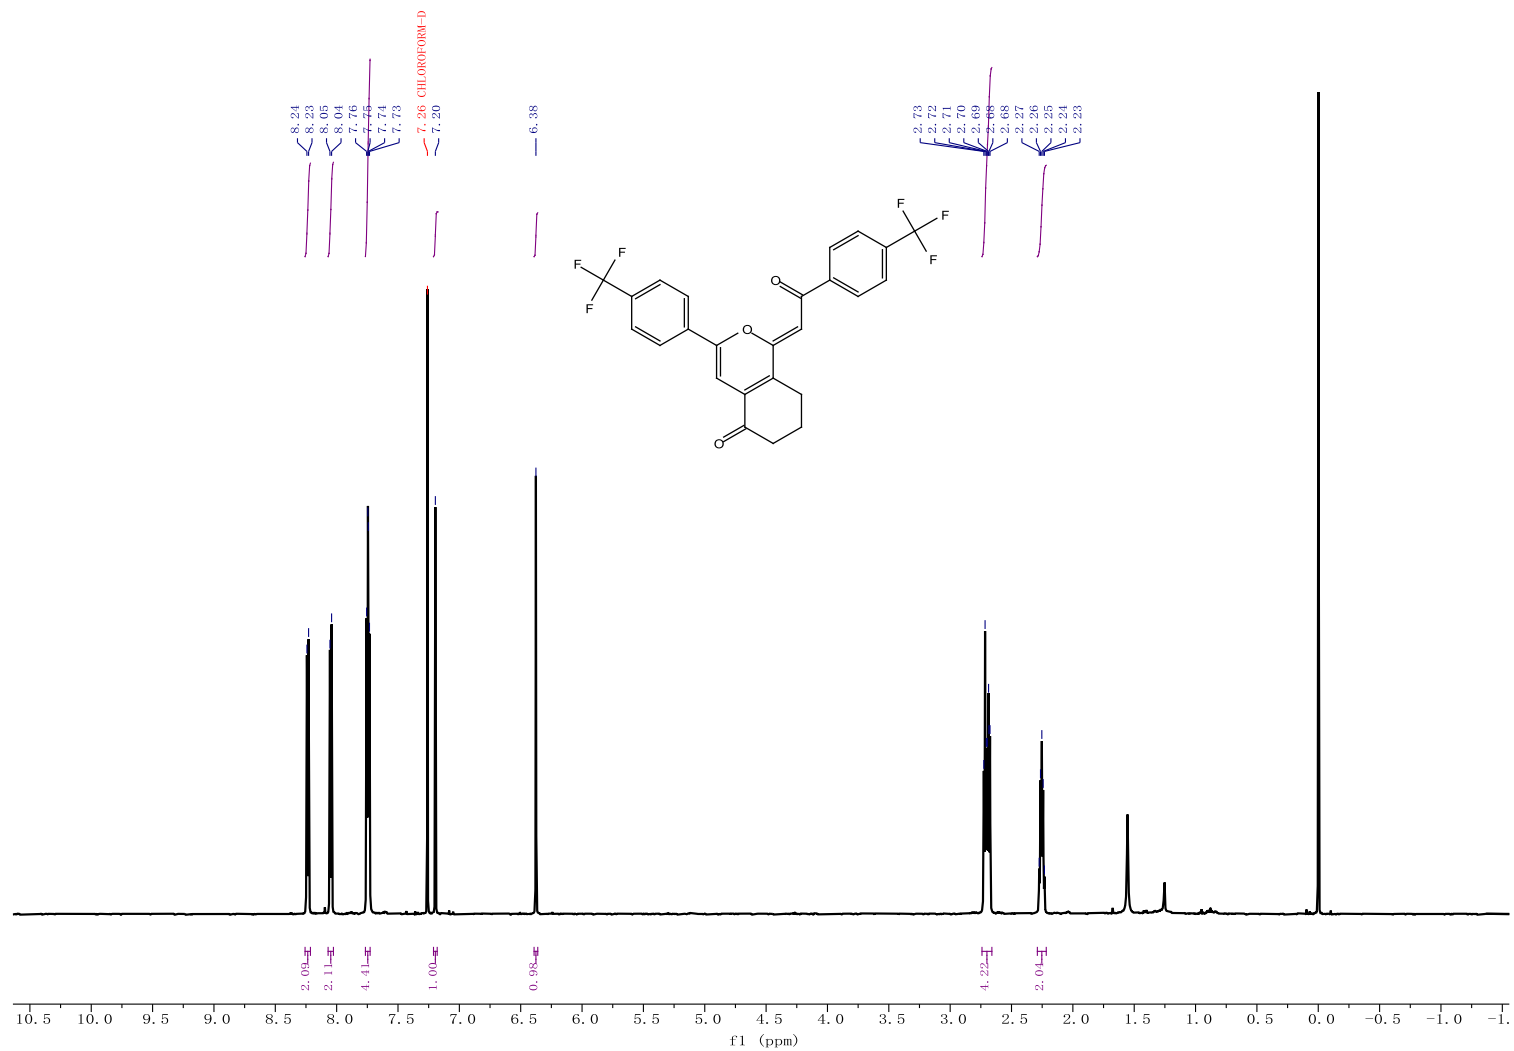

S223

$^{13}\text{C}$  NMR (151 MHz,  $\text{CDCl}_3$ ) of **6u**

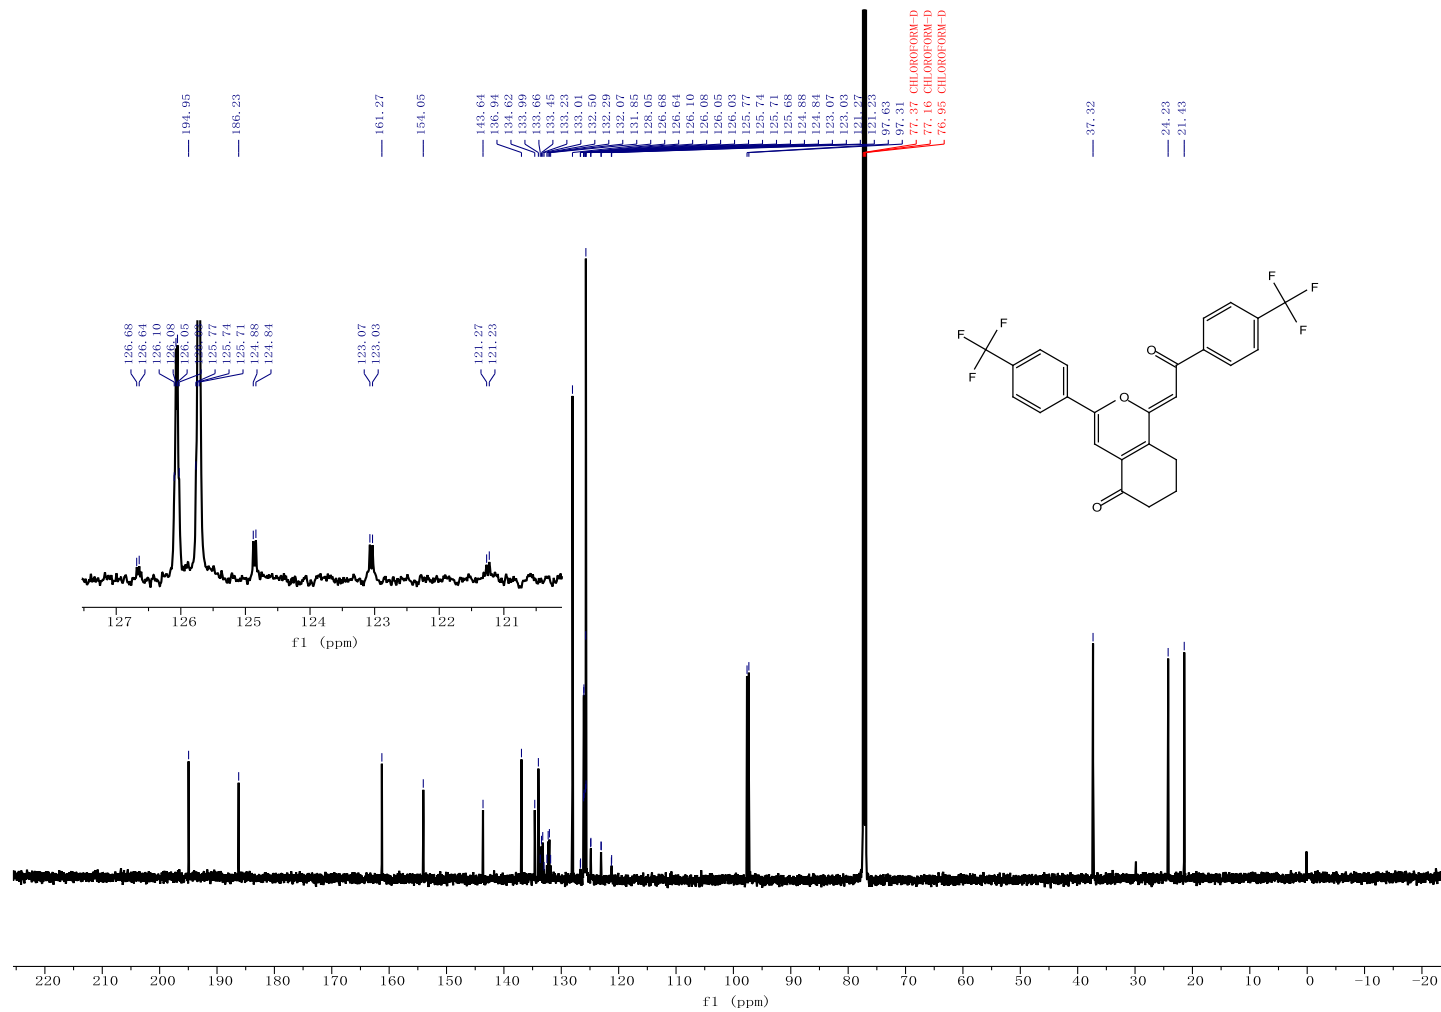



$^{19}\text{F}$  NMR (565 MHz,  $\text{CDCl}_3$ ) of **6u**

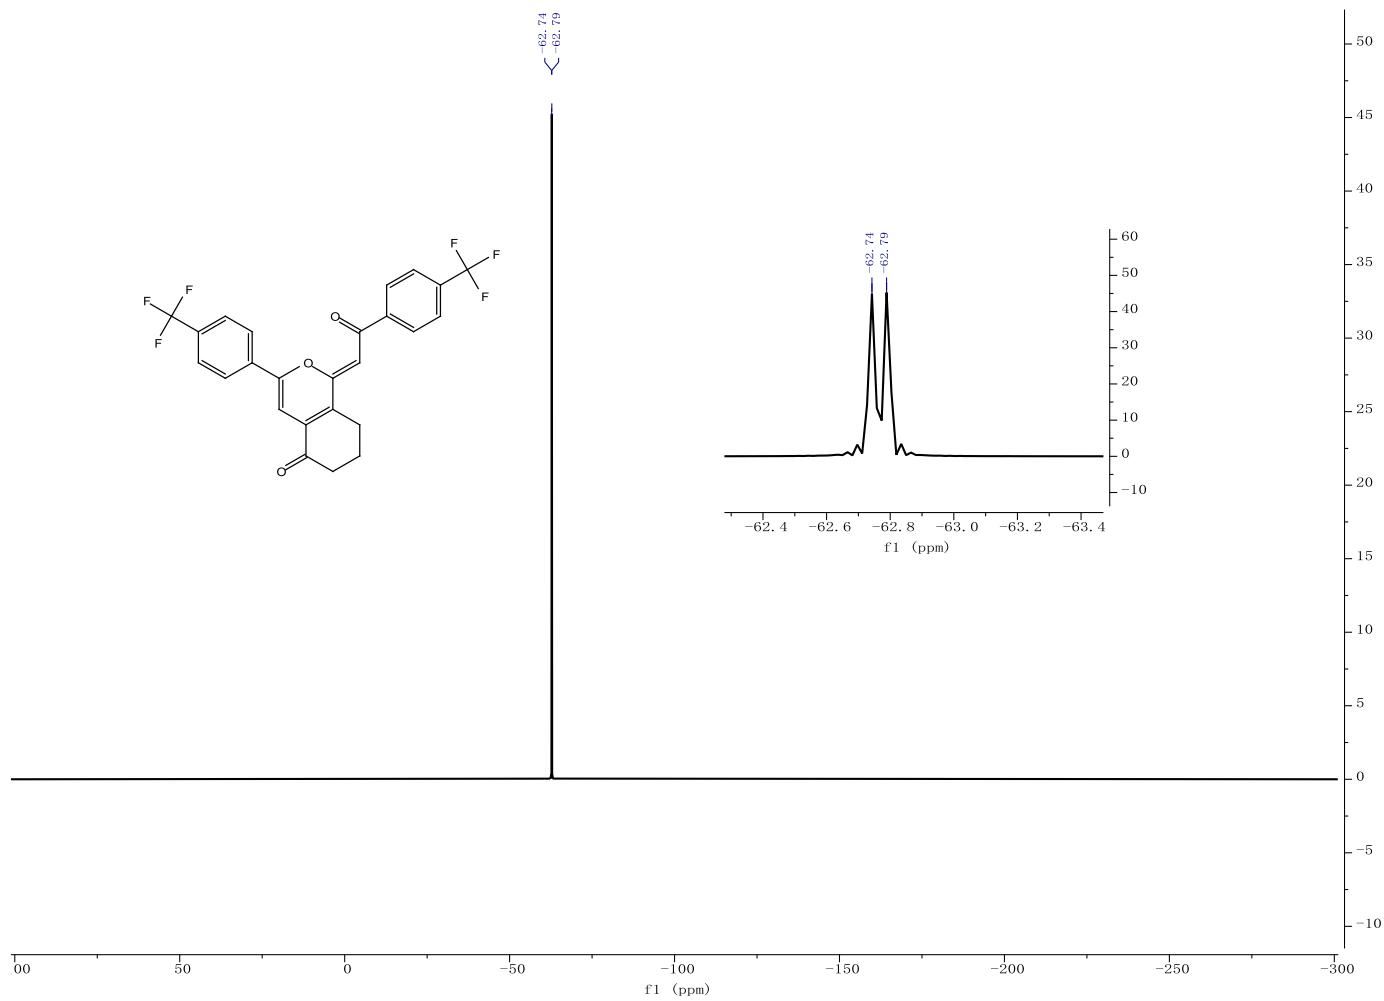

$^1\text{H}$  NMR (600 MHz,  $\text{CDCl}_3$ ) of **6v**

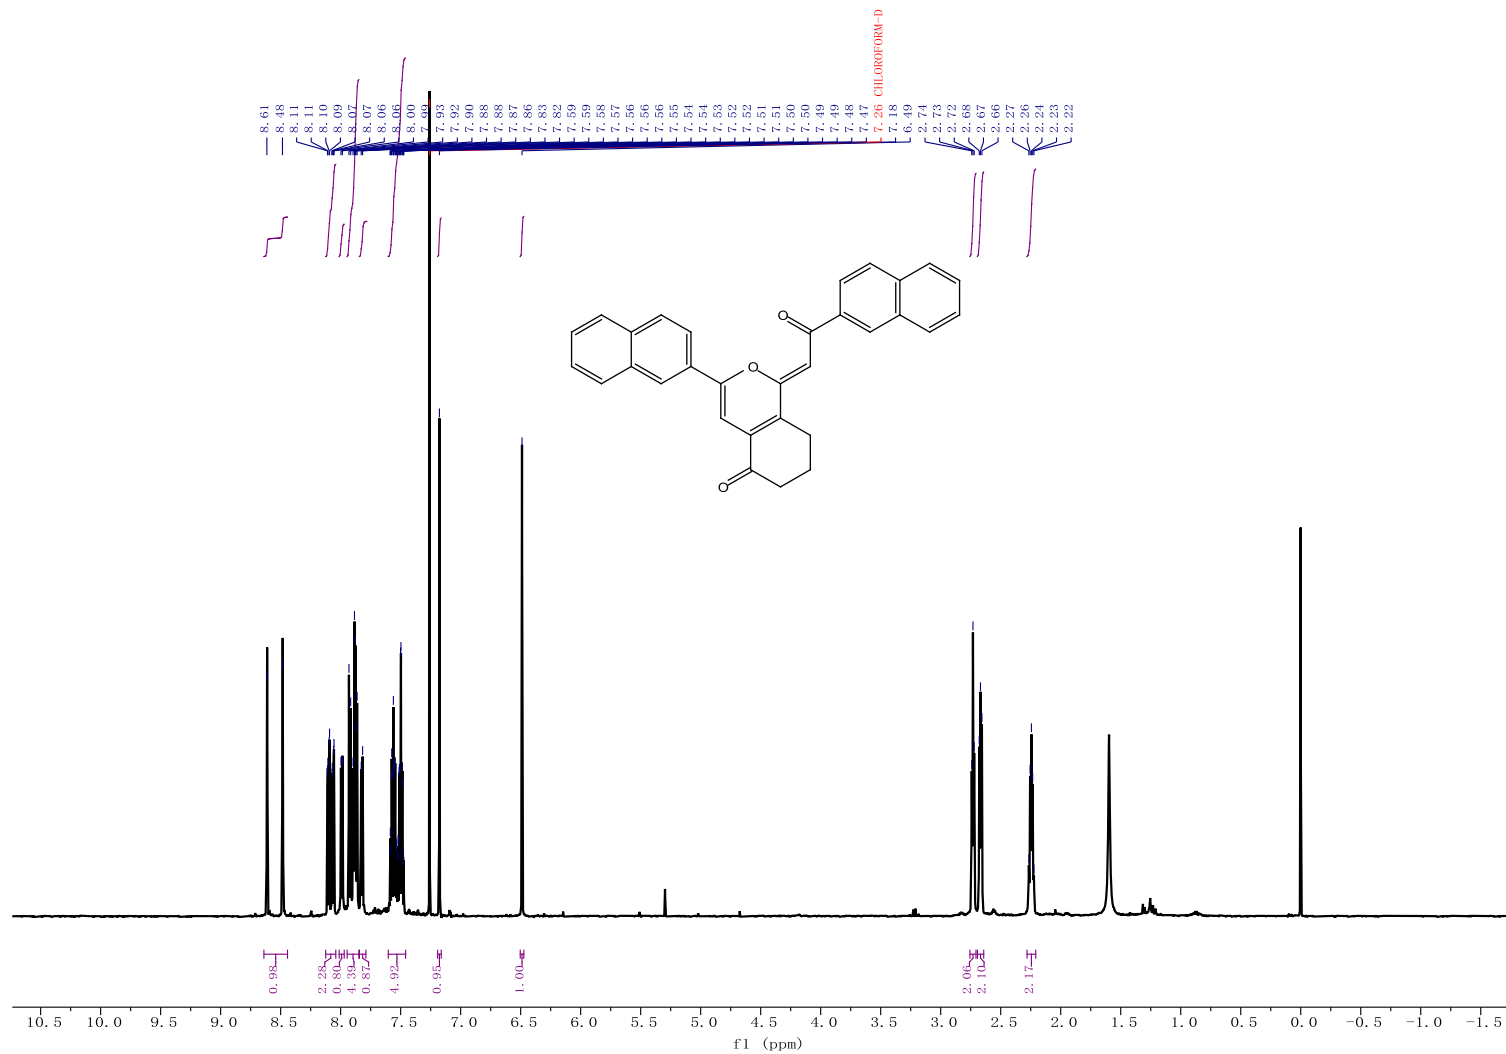

$^{13}\text{C}$  NMR (151 MHz,  $\text{CDCl}_3$ ) of **6v**

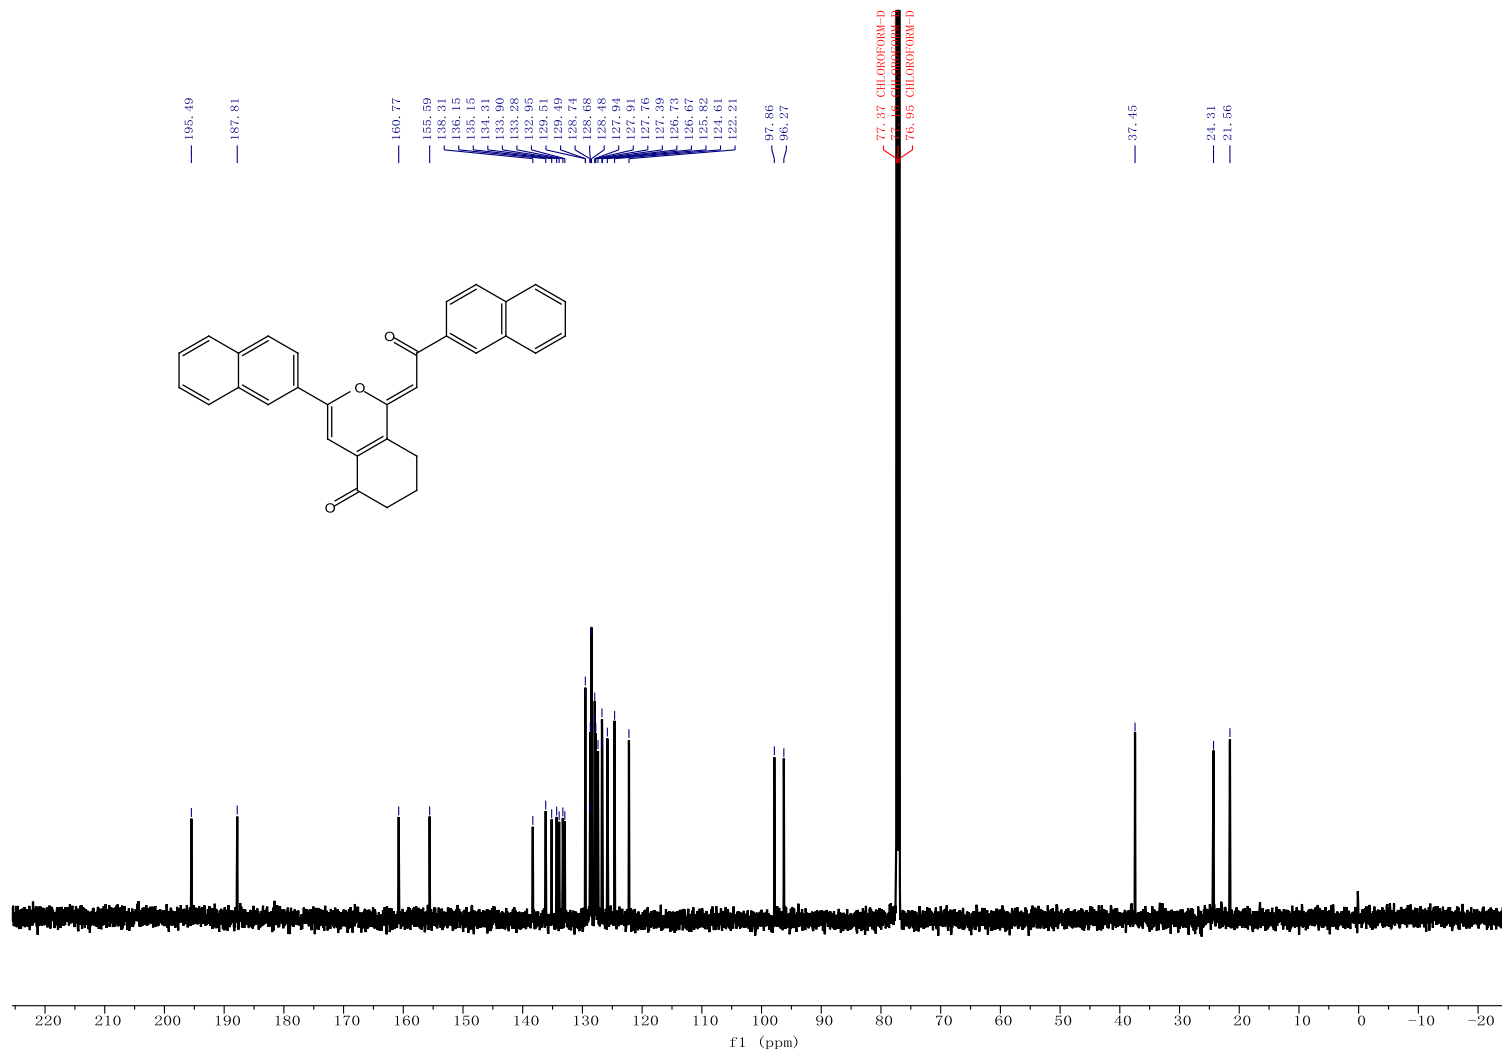

<sup>1</sup>H NMR (600 MHz, CDCl<sub>3</sub>) of **6w**

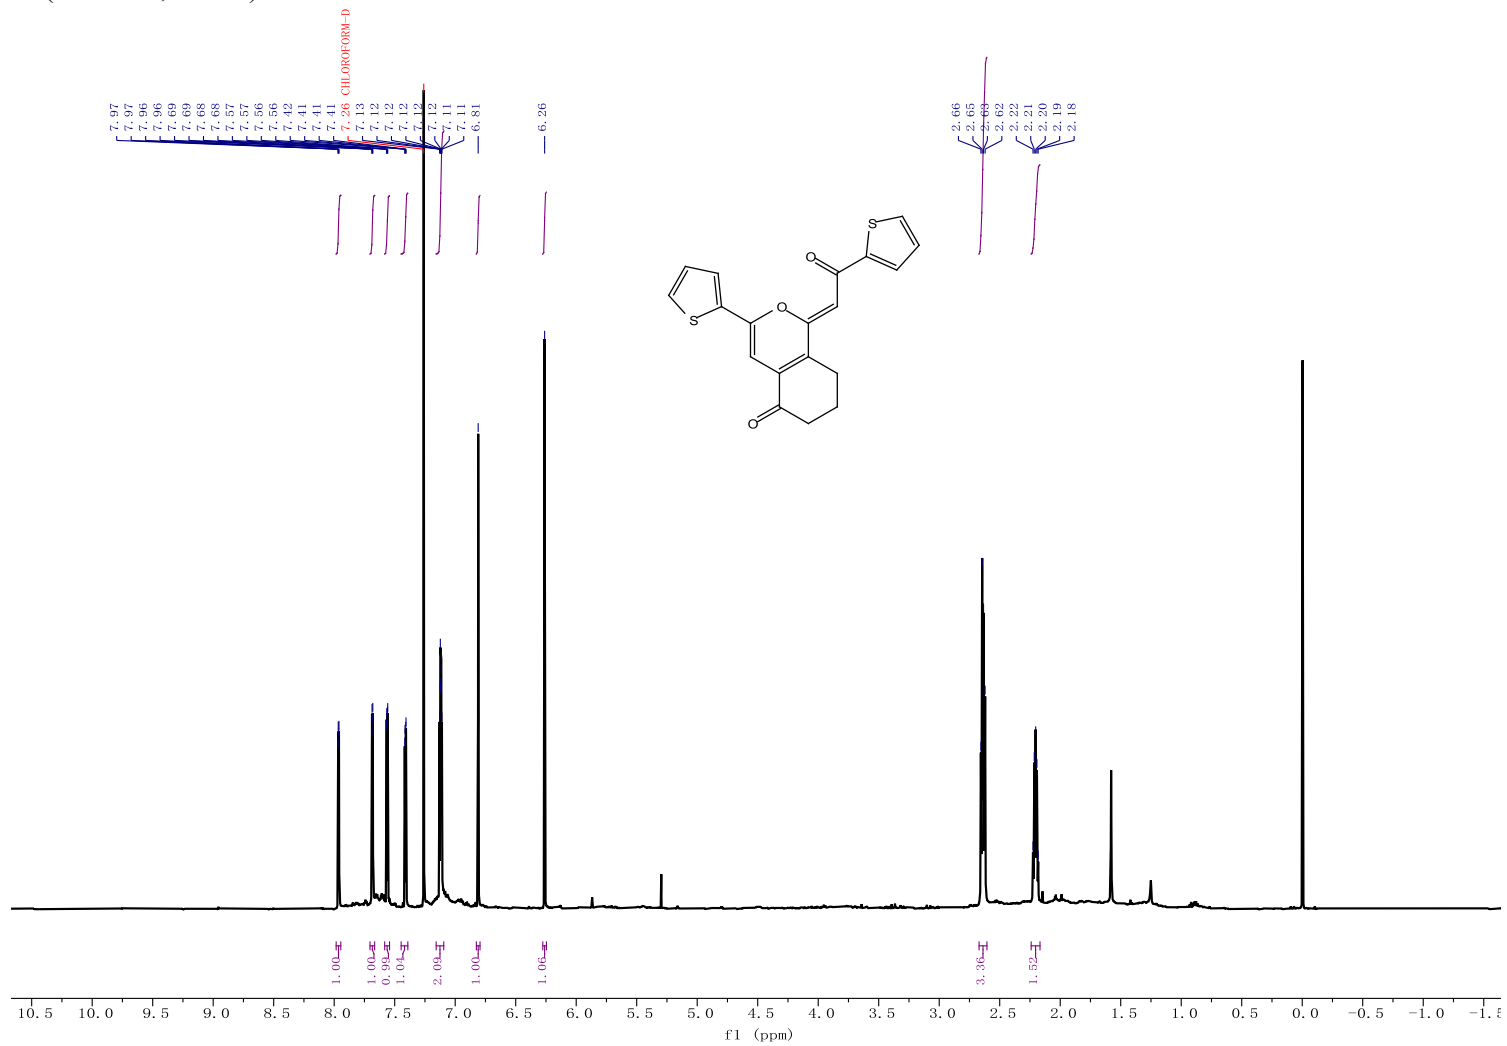

$^{13}\text{C}$  NMR (151 MHz,  $\text{CDCl}_3$ ) of **6w**

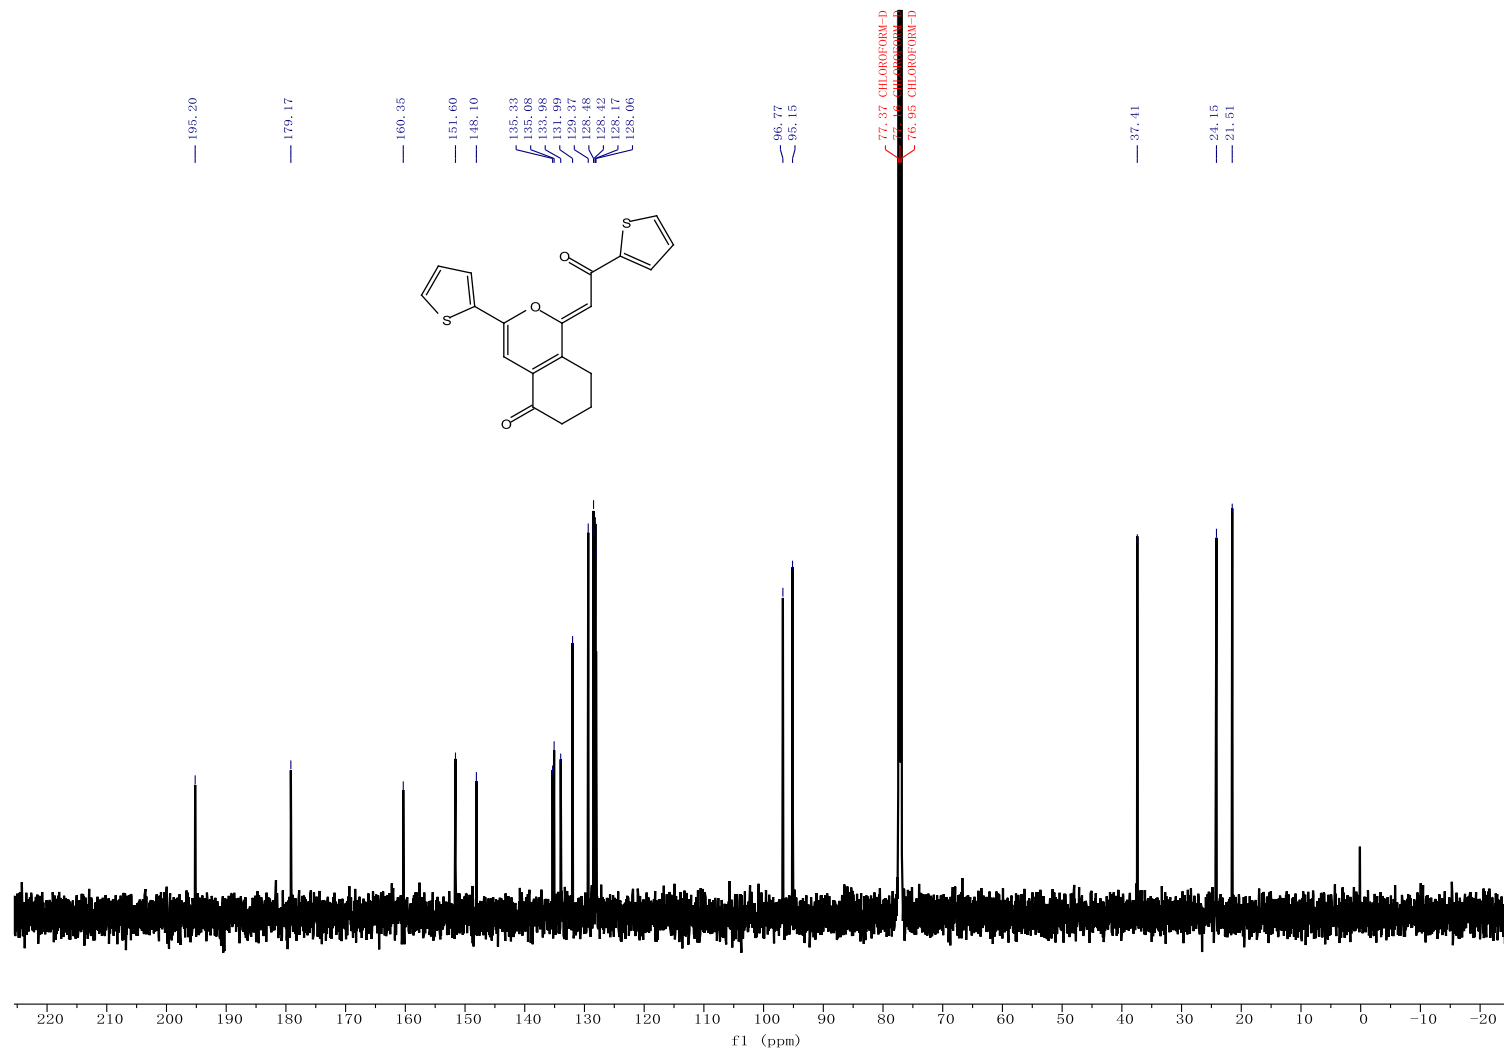

<sup>1</sup>H NMR (600 MHz, CDCl<sub>3</sub>) of **6x**

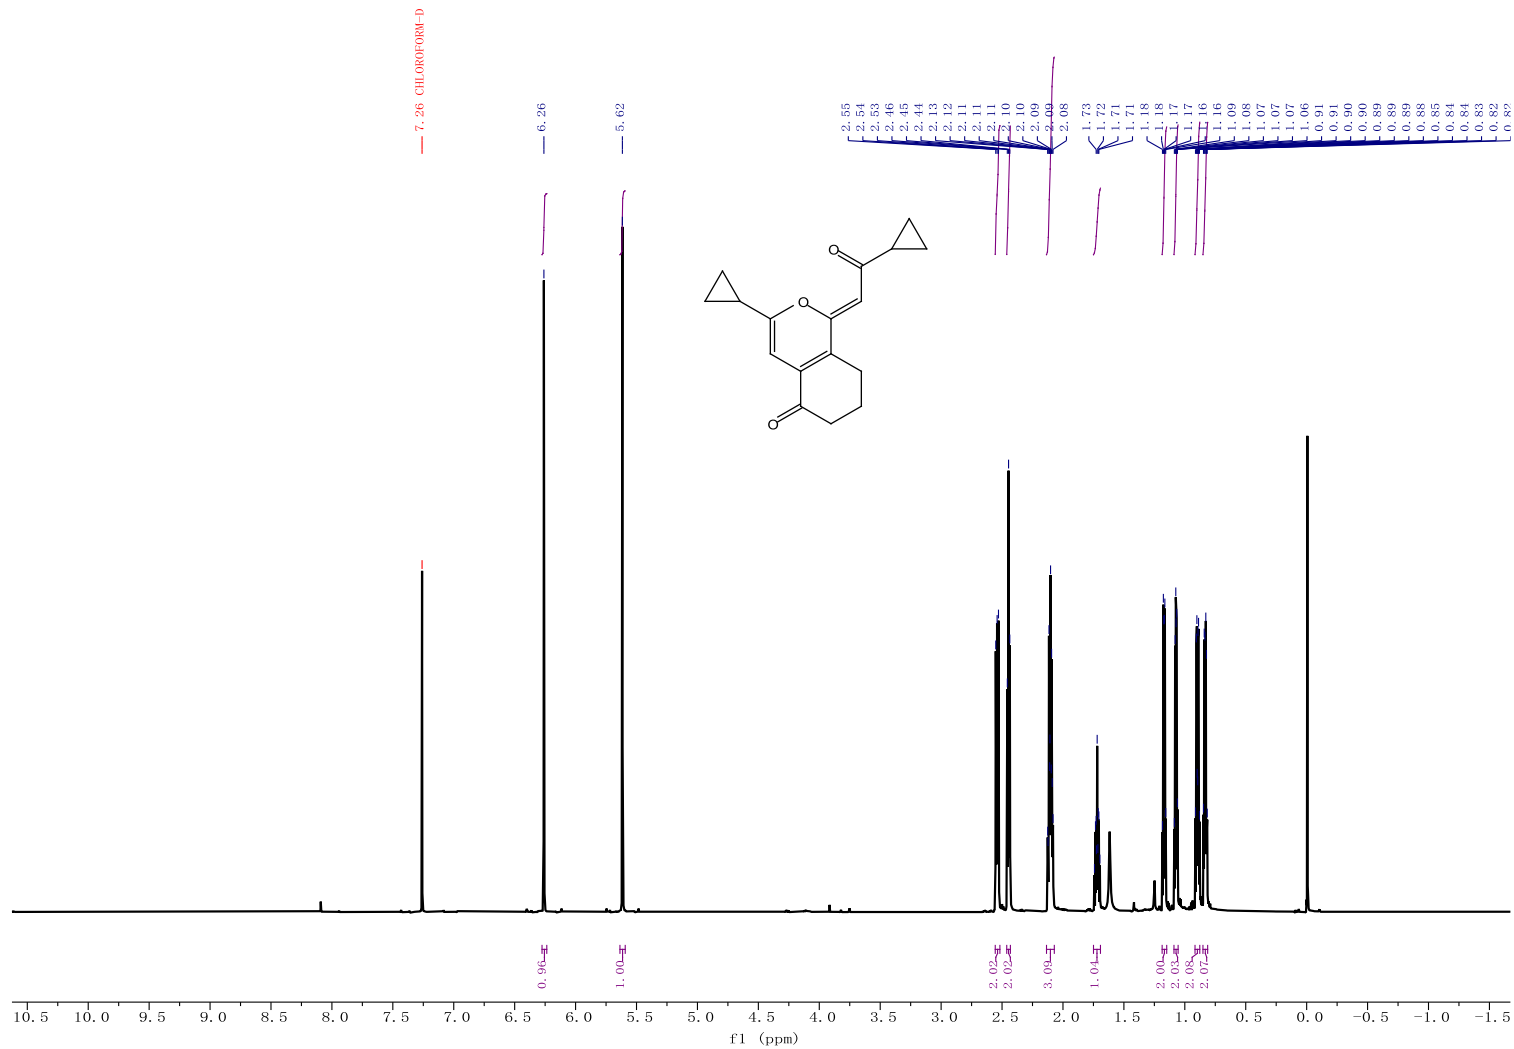

$^{13}\text{C}$  NMR (151 MHz,  $\text{CDCl}_3$ ) of **6x**

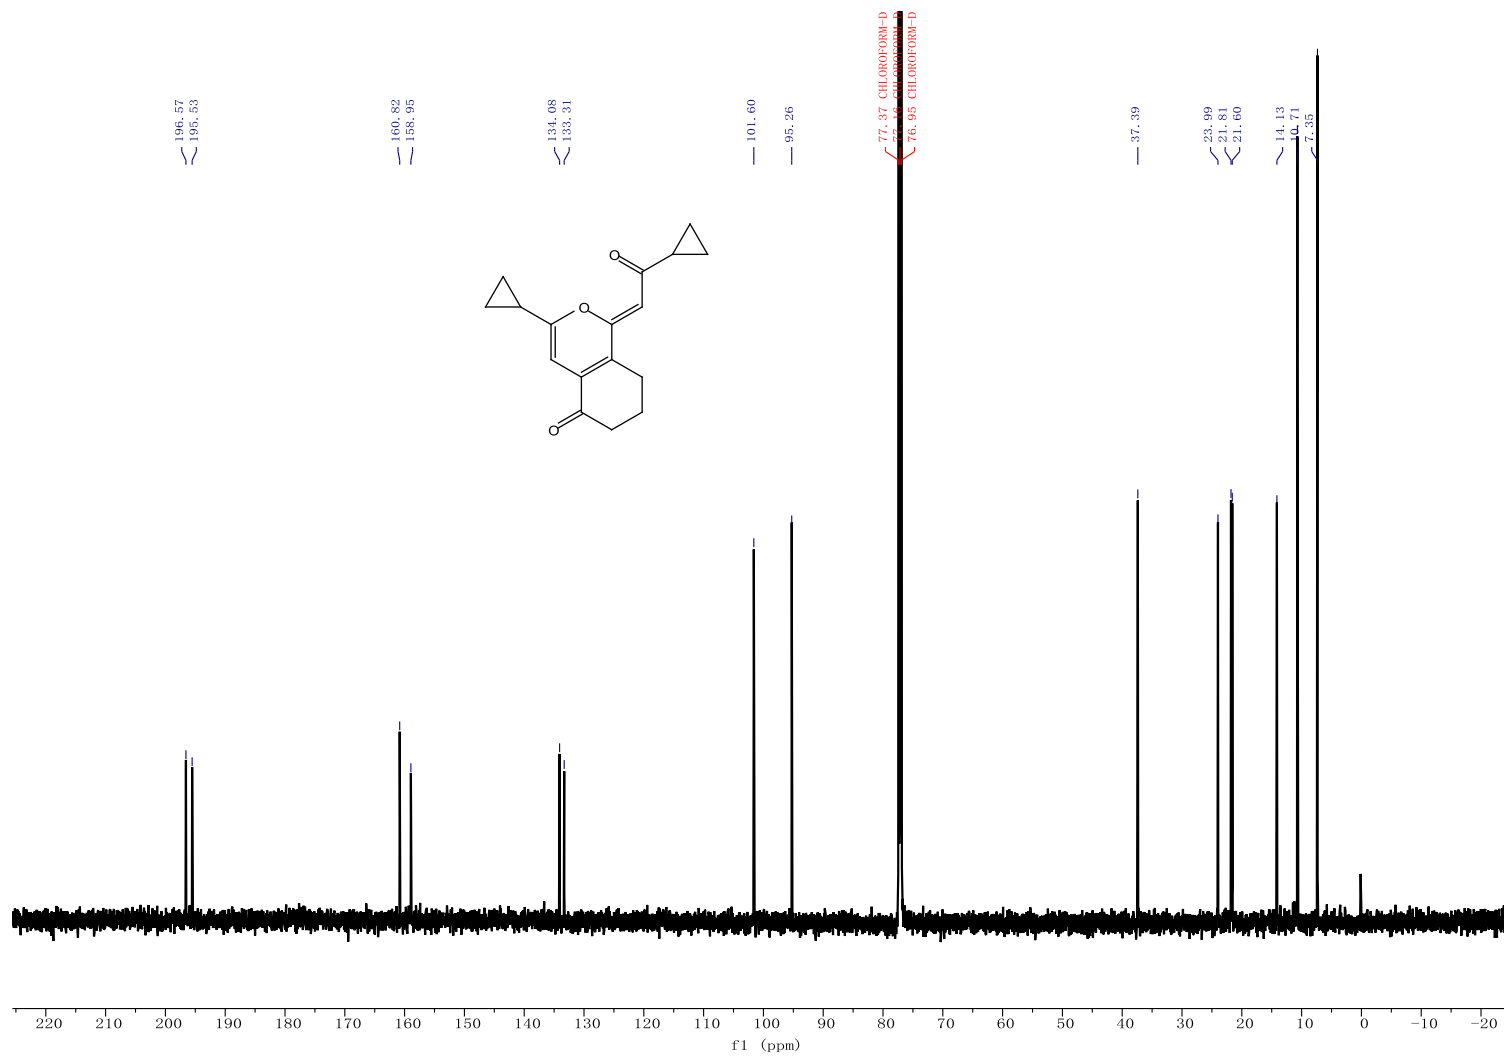

<sup>1</sup>H NMR (600 MHz, CDCl<sub>3</sub>) of **6ad**

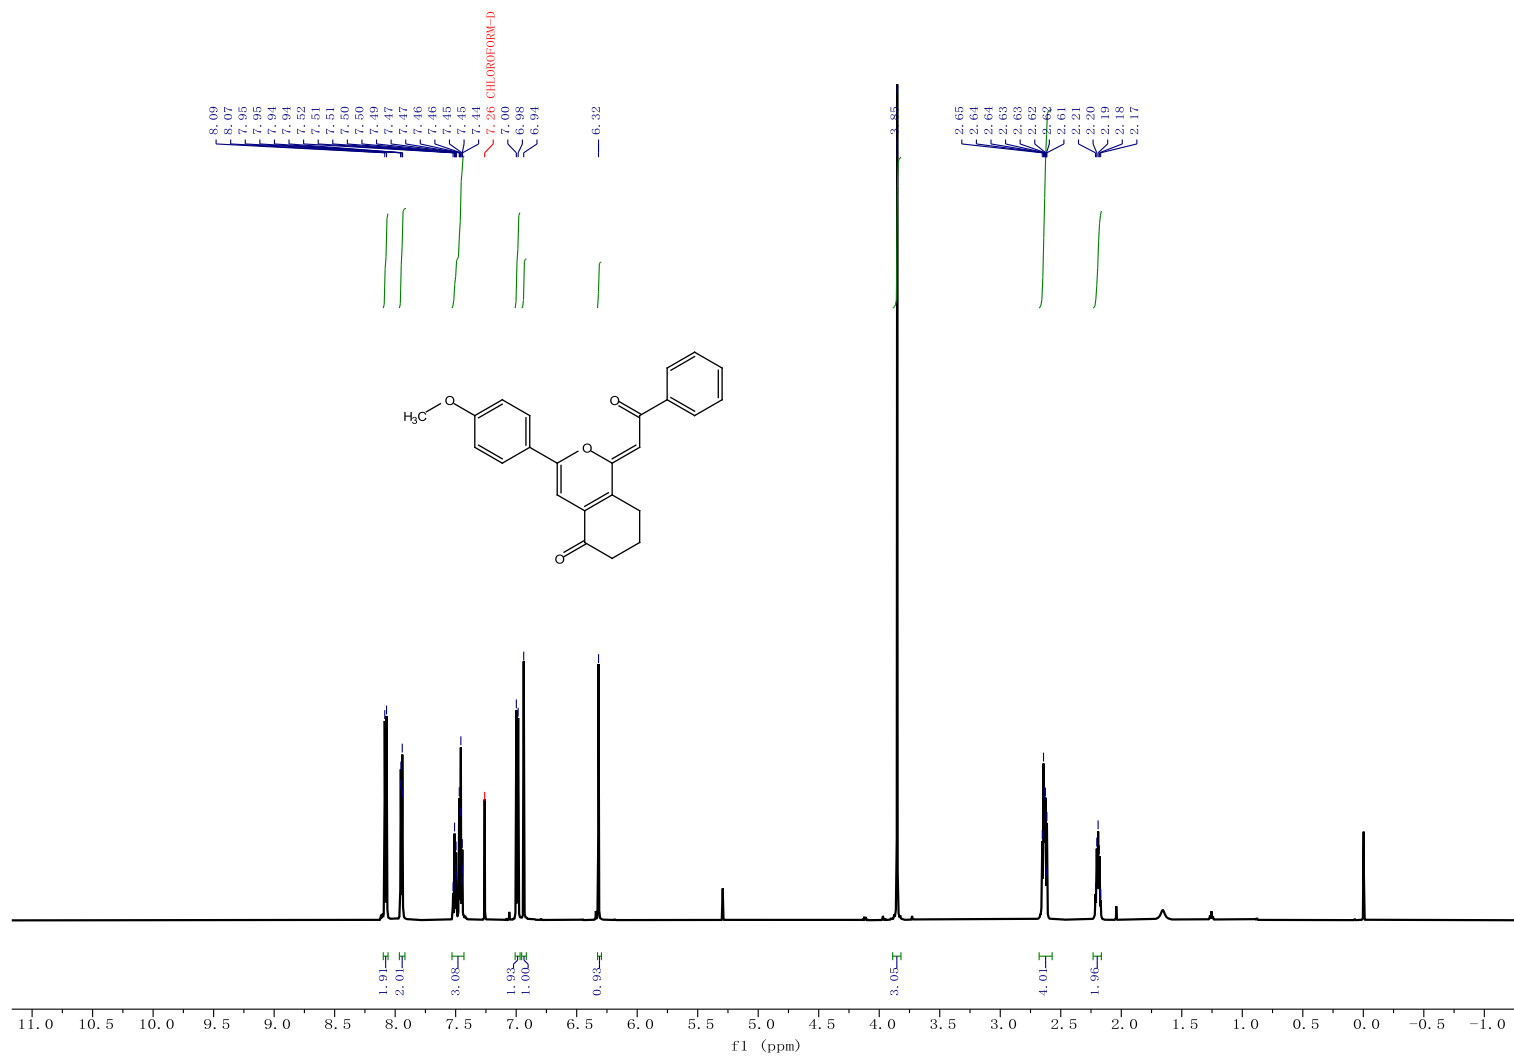



<sup>13</sup>C NMR (151 MHz, CDCl<sub>3</sub>) of **6ad**

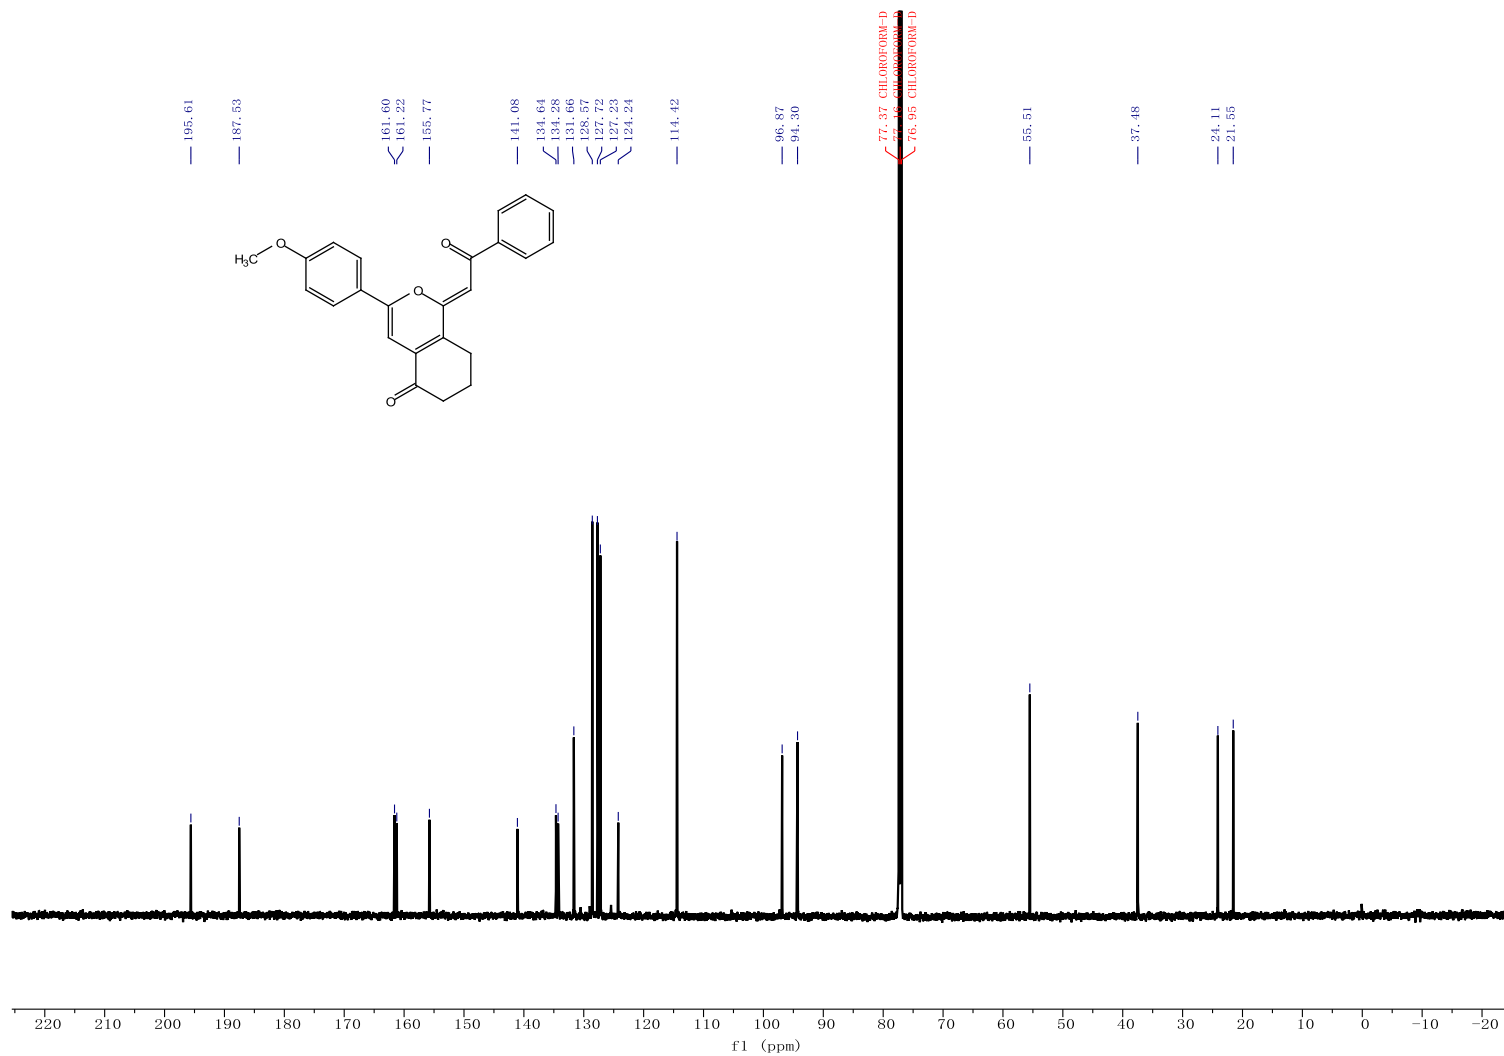

<sup>1</sup>H NMR (600 MHz, CDCl<sub>3</sub>) of **6du**

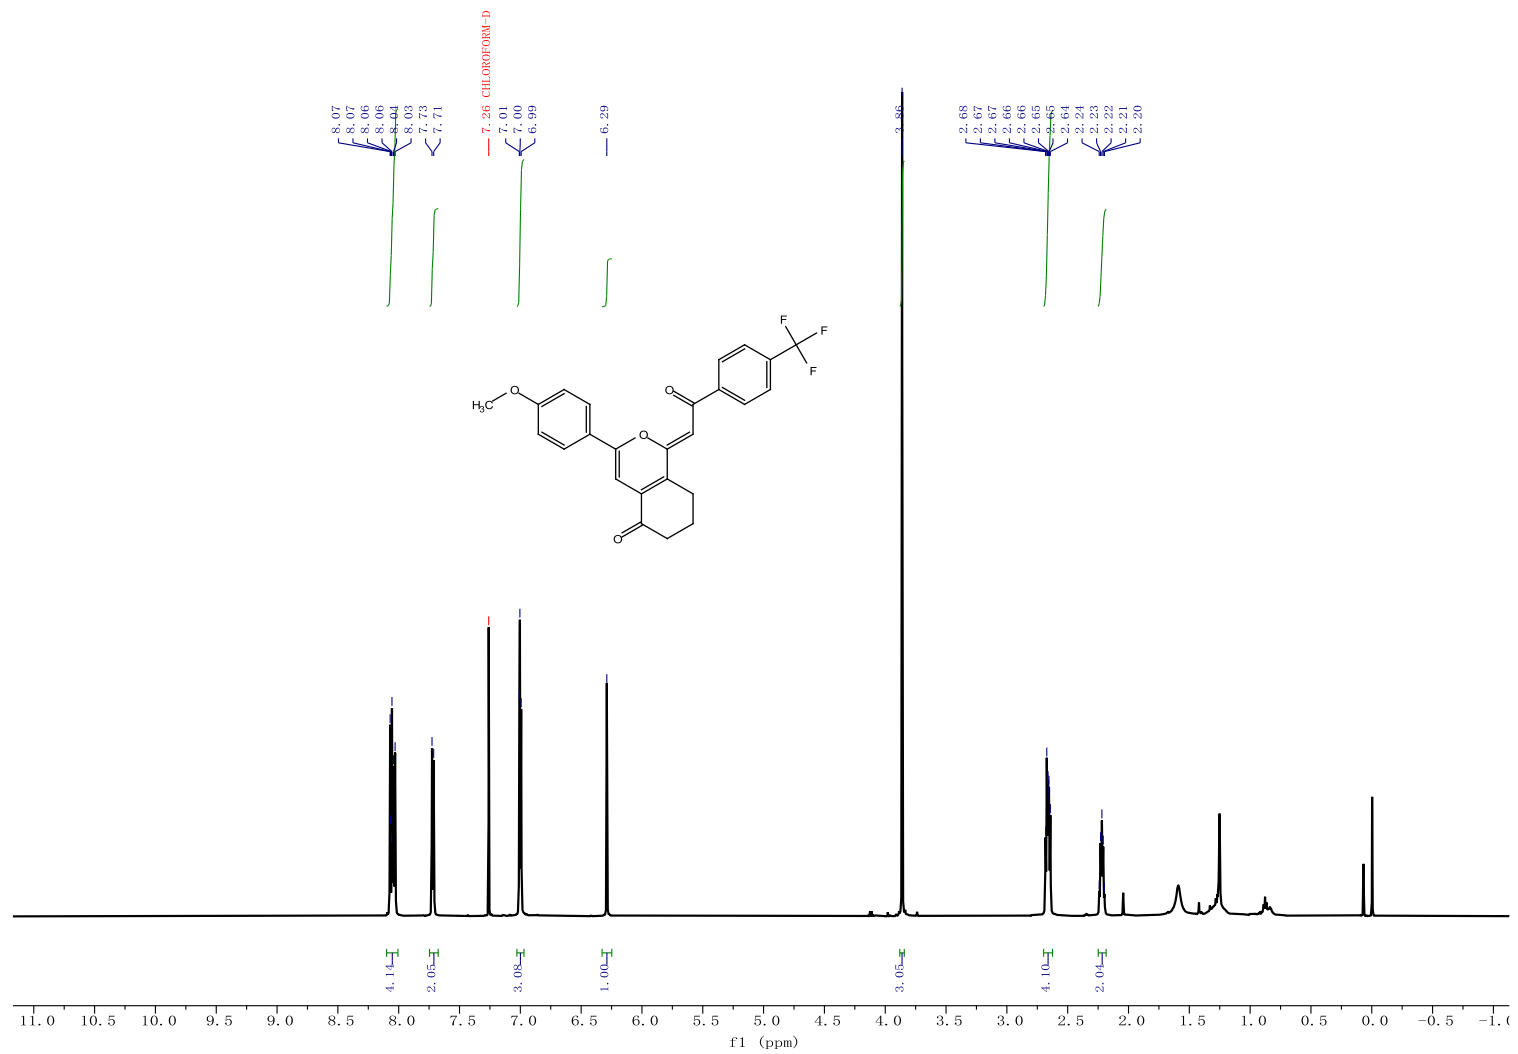

$^{13}\text{C}$  NMR (151 MHz,  $\text{CDCl}_3$ ) of **6du**

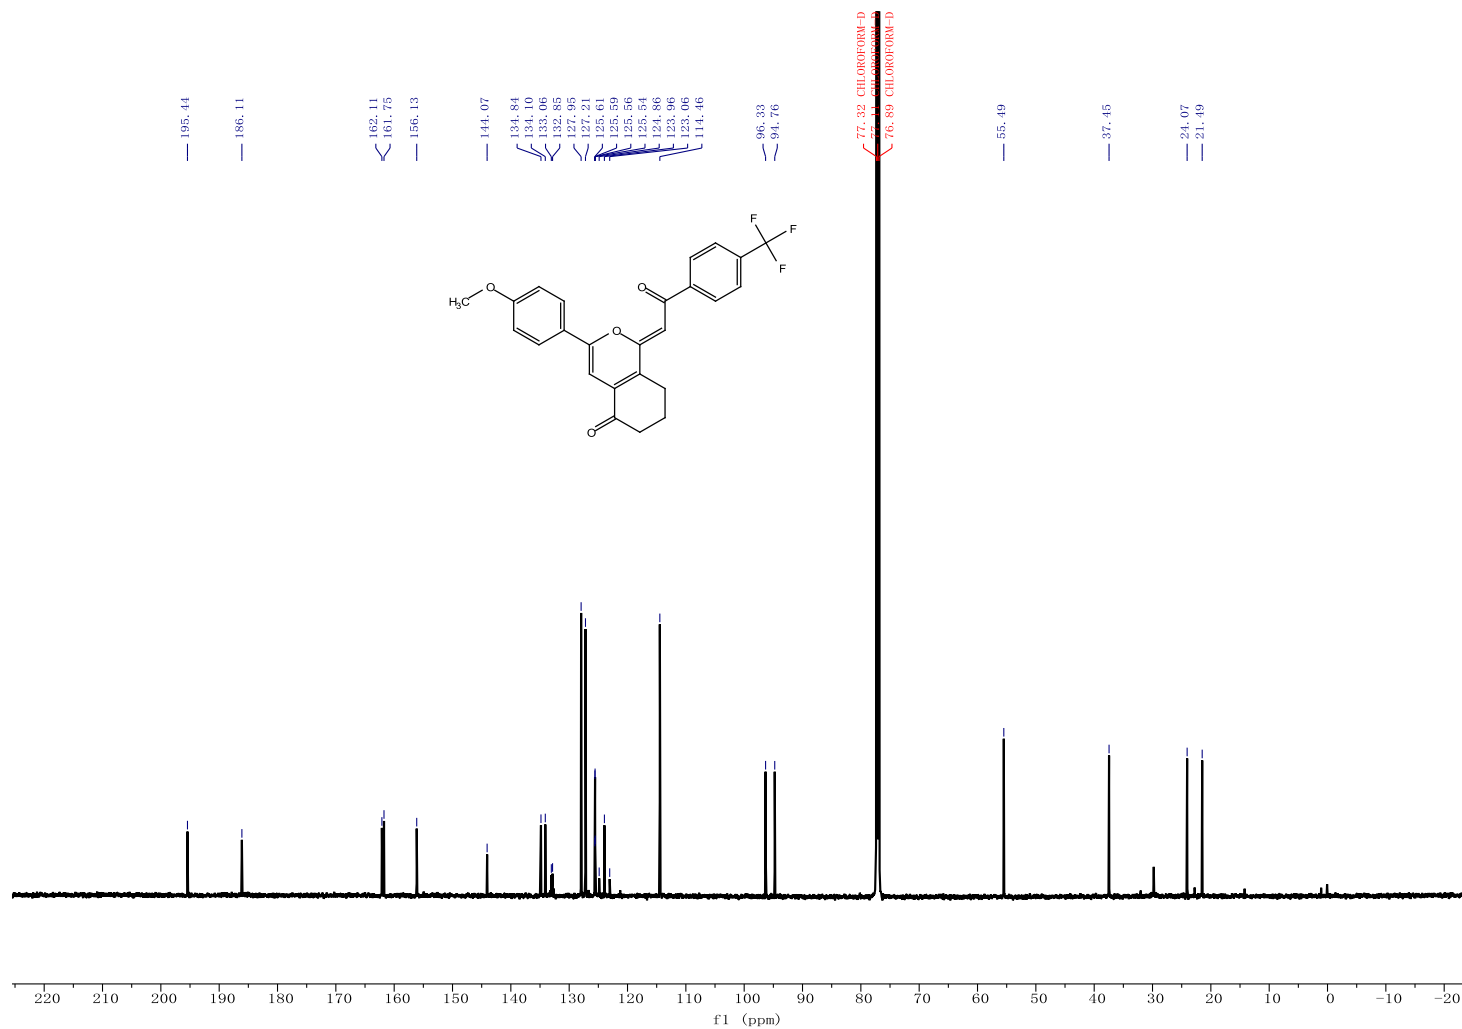

$^{19}\text{F}$  NMR (565 MHz,  $\text{CDCl}_3$ ) of **6du**

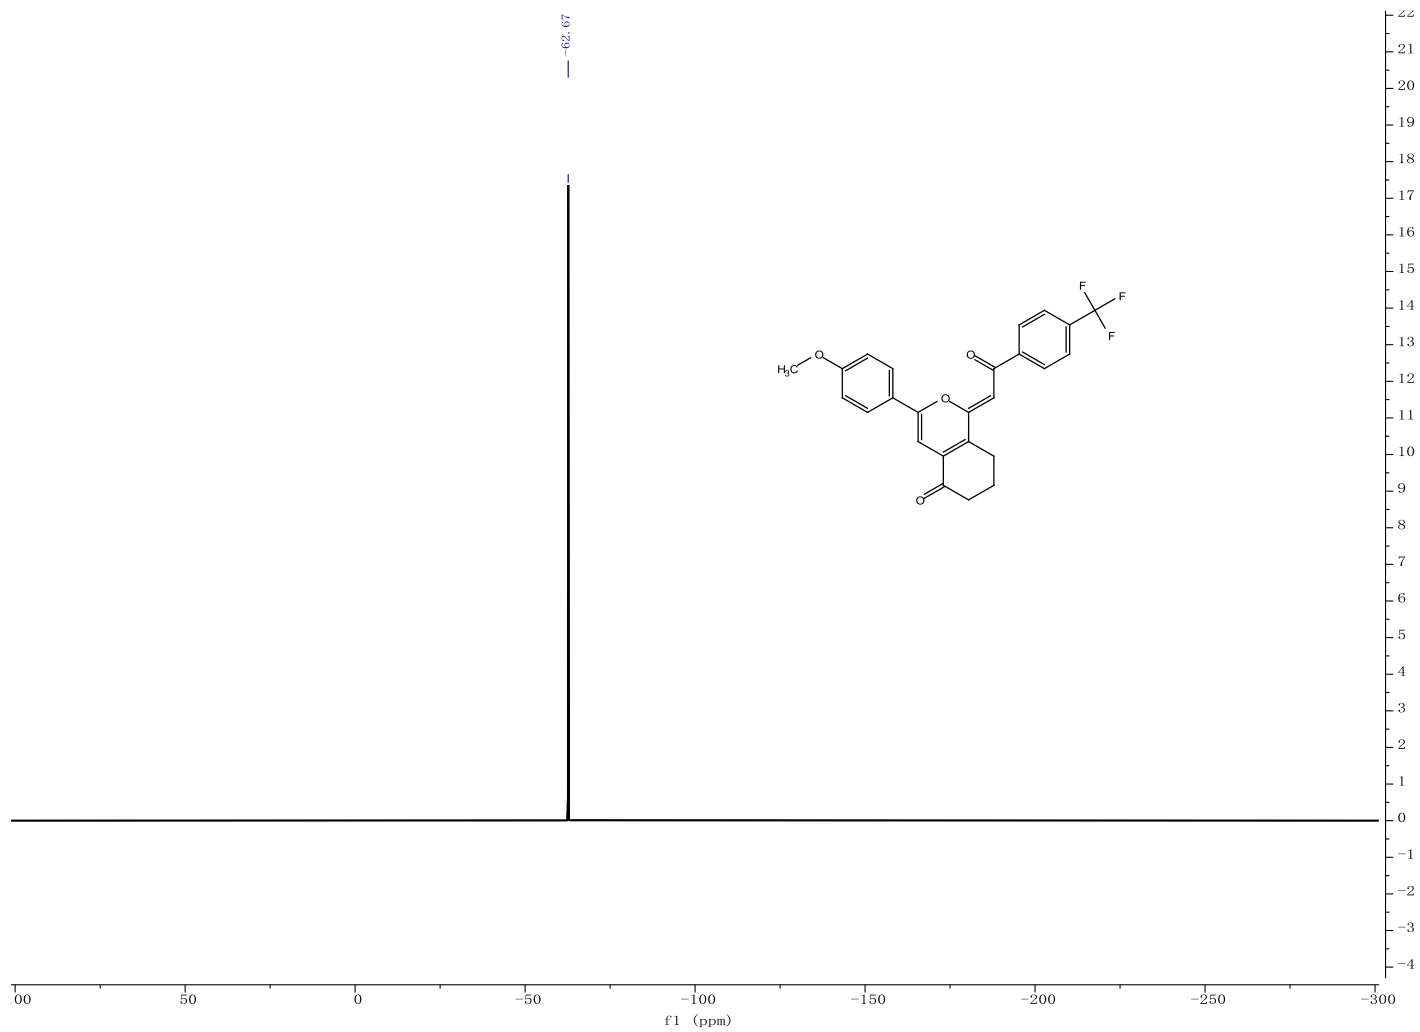

S236

## 6. References

1. N. A. Petasis and K. A. Teets, *J. Am. Chem. Soc.*, 1992, **114**, 10328-10334.
2. J. Teske and B. Plietker, *Org. Lett.*, 2018, **20**, 2257-2260.
